# Supplementary material for: Identification of ERAD-dependent degrons for the endoplasmic reticulum lumen
Source: eLife journal article supplement (doi:10.7554/elife.89606), 2023-09-05

Figure 2. DegV1 is an ERAD-dependent degron degraded by the cytosolic proteasome.

A

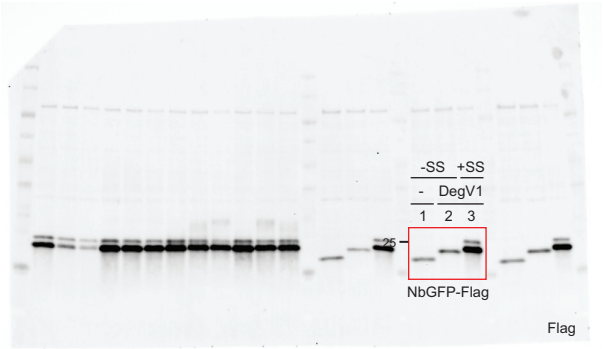

B

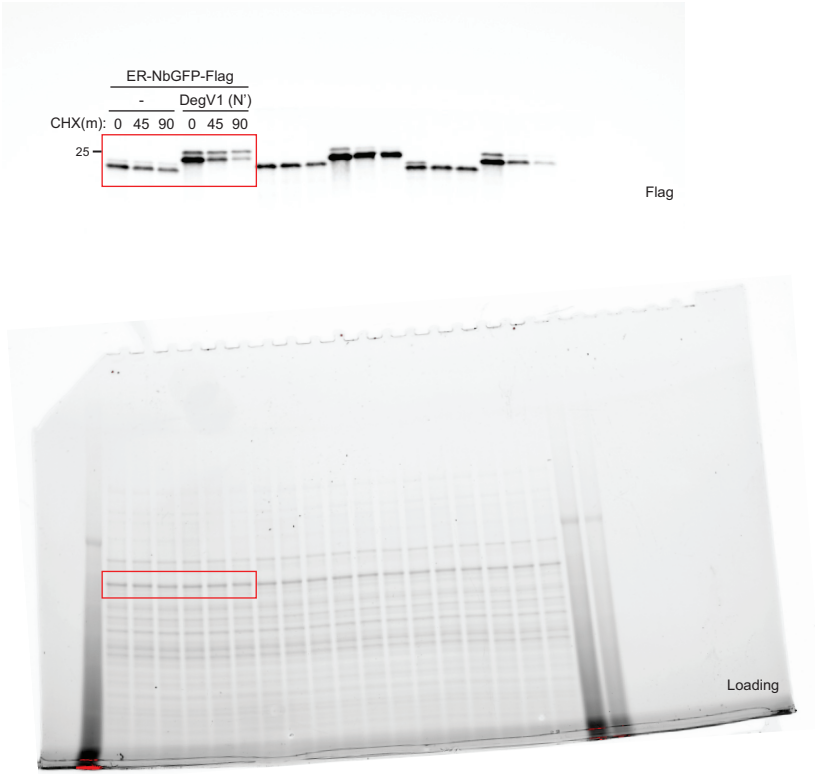

**Figure 2. DegV1 is an ERAD-dependent degron degraded by the cytosolic proteasome.**

**C**

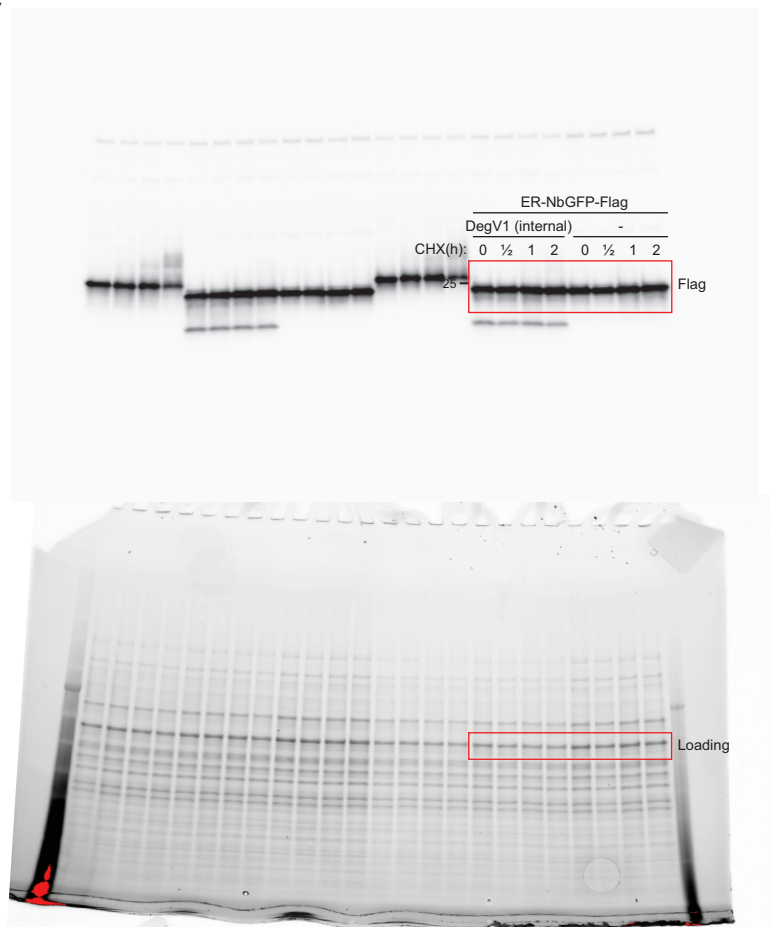

**D**

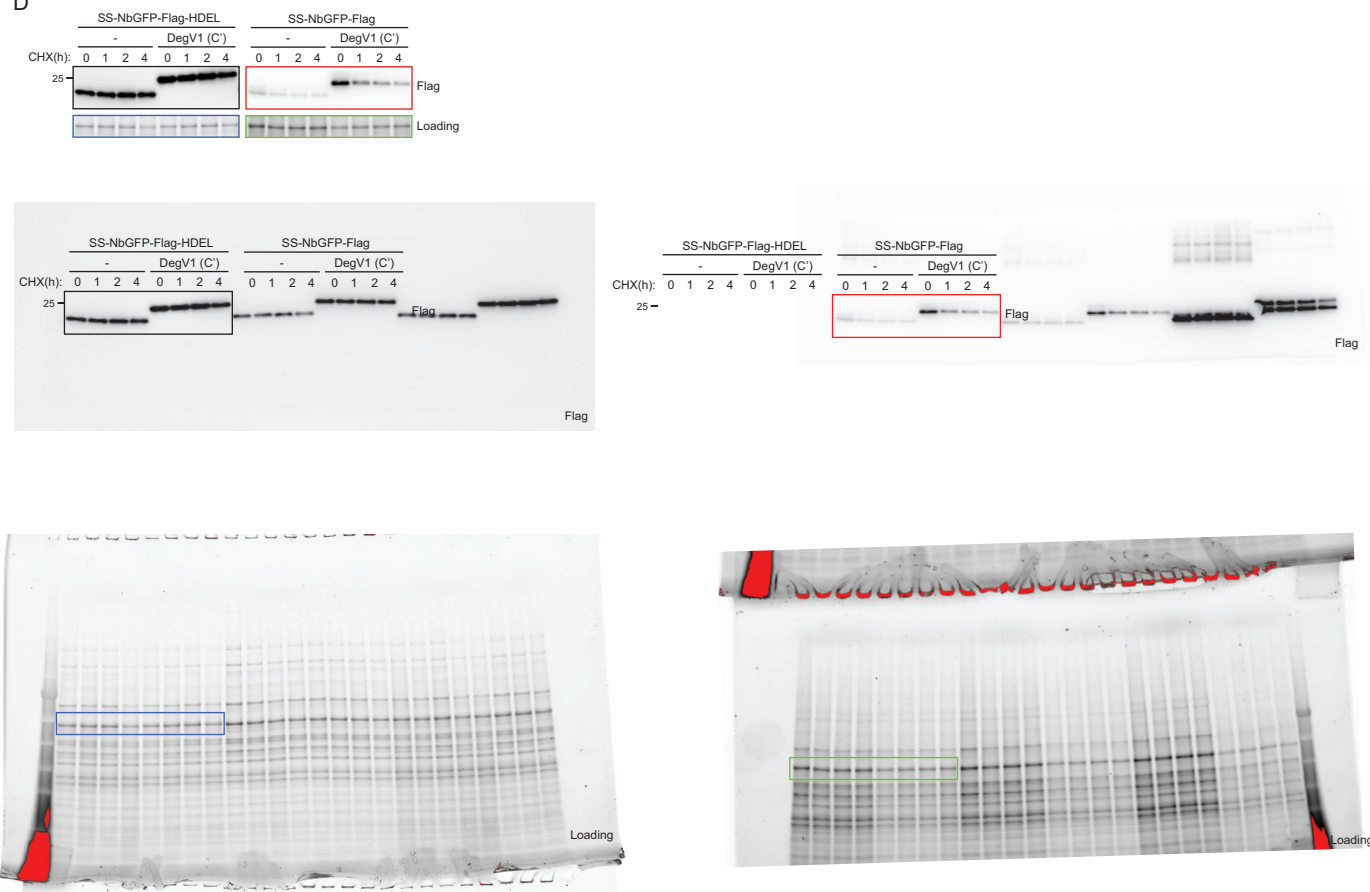

Figure 2. DegV1 is an ERAD-dependent degron degraded by the cytosolic proteasome.

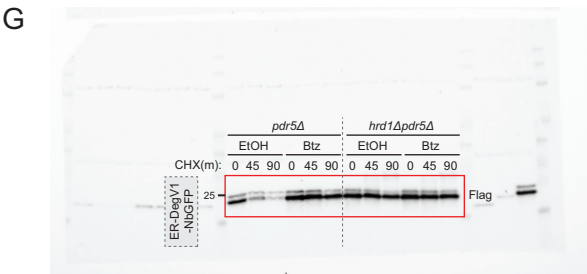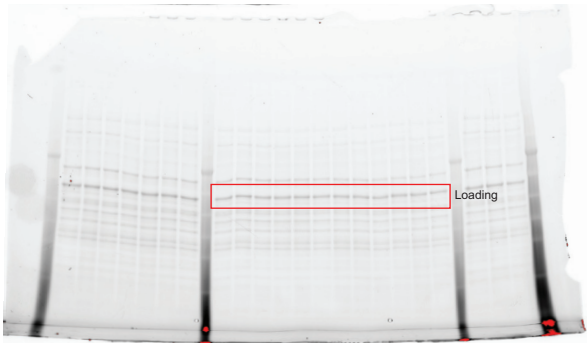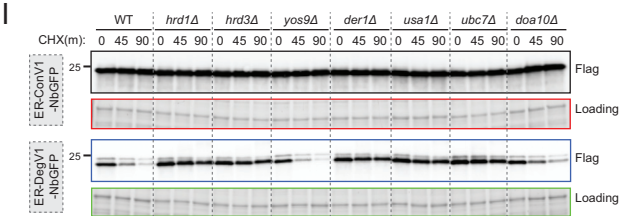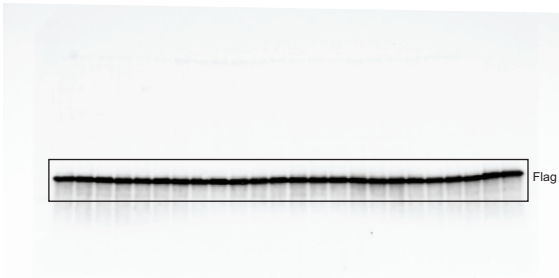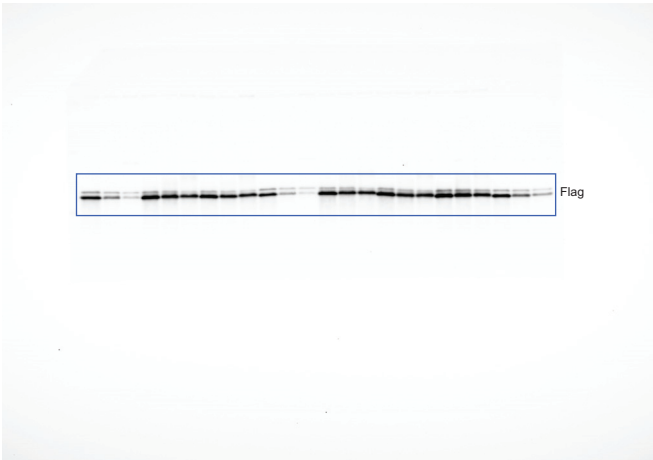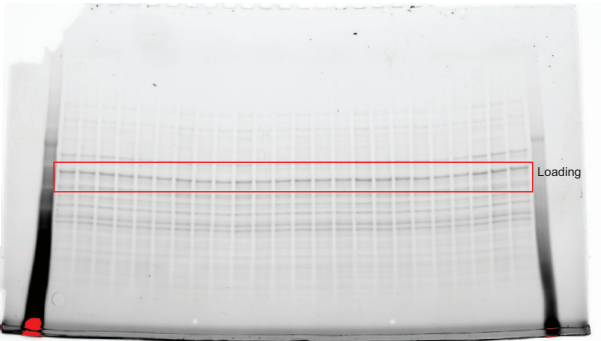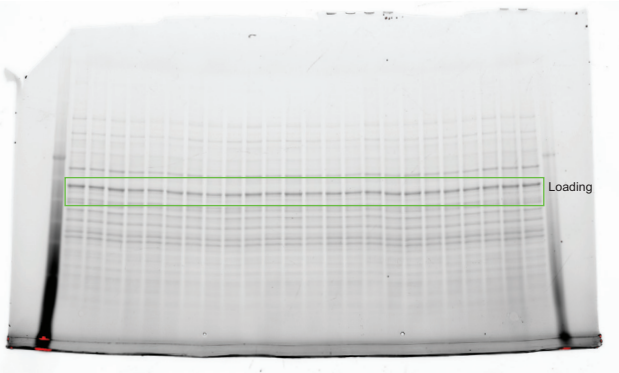

Supplement: fig2-data1 [file elife-89606-fig2-data1-v1.zip]
