# Supplementary material for: Identification of ERAD-dependent degrons for the endoplasmic reticulum lumen
Source: eLife journal article supplement (doi:10.7554/elife.89606), 2023-09-05

Figure 3. DegV targets endogenous ER proteins for degradation

A

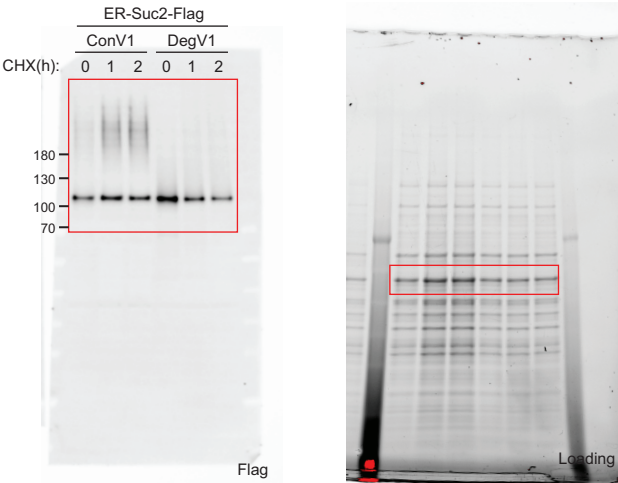

B

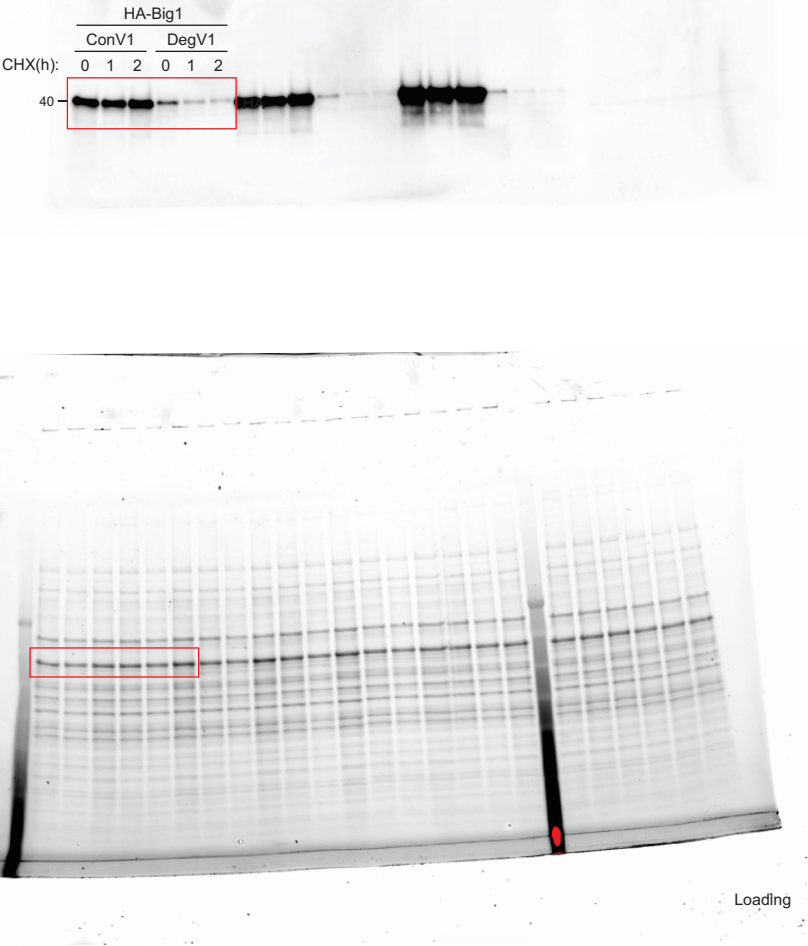

C

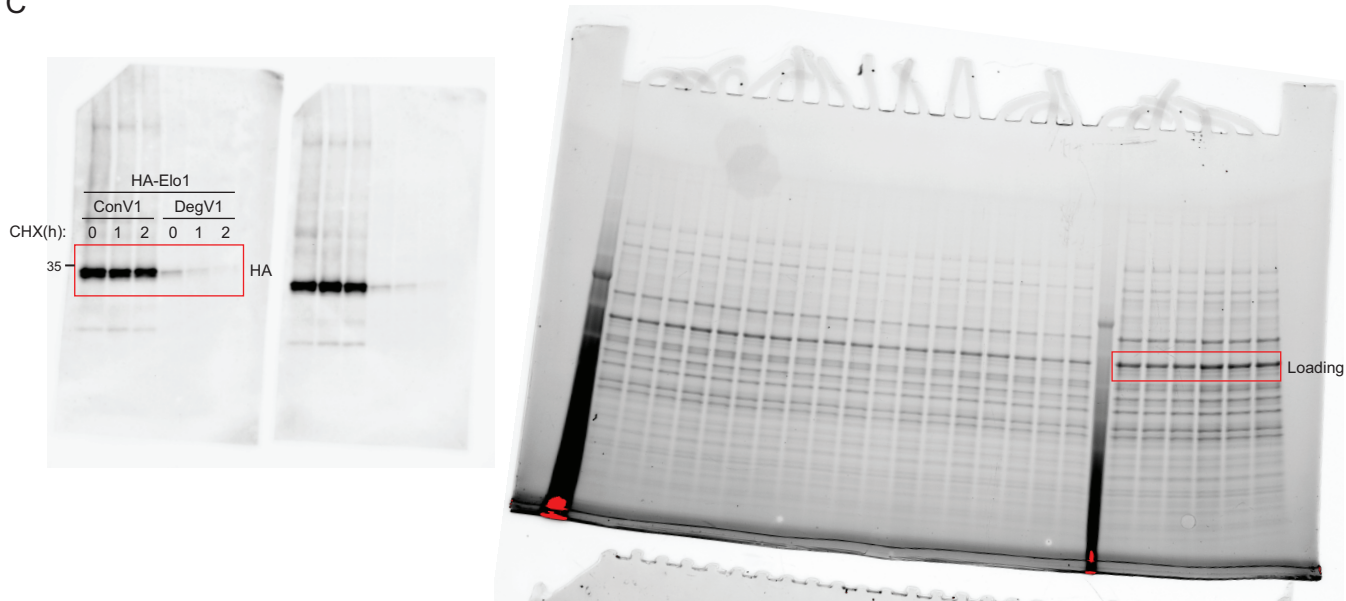

D

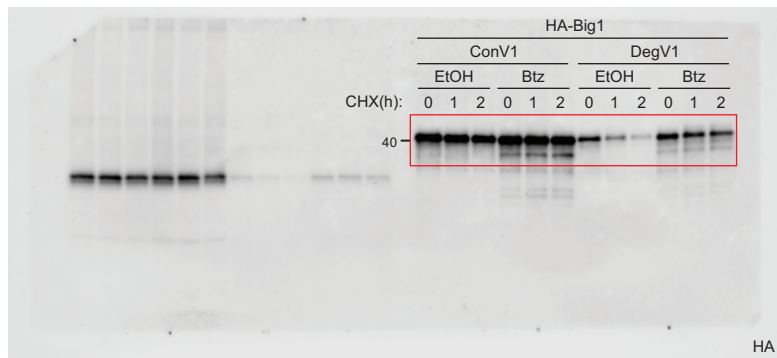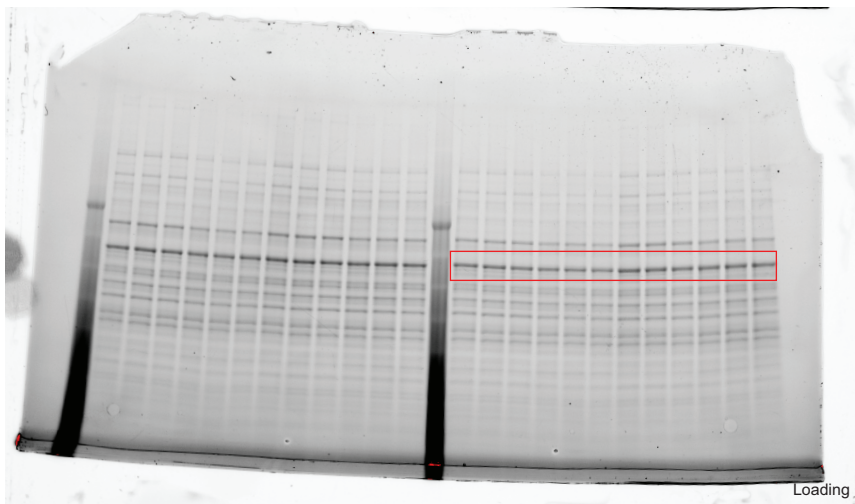

Figure 3. DegV targets endogenous ER proteins for degradation

E

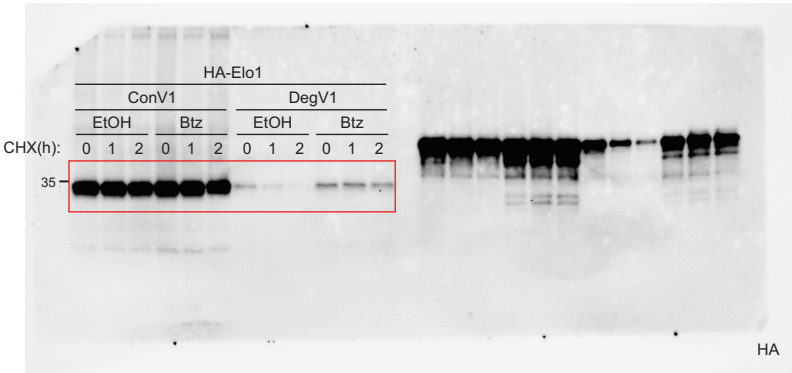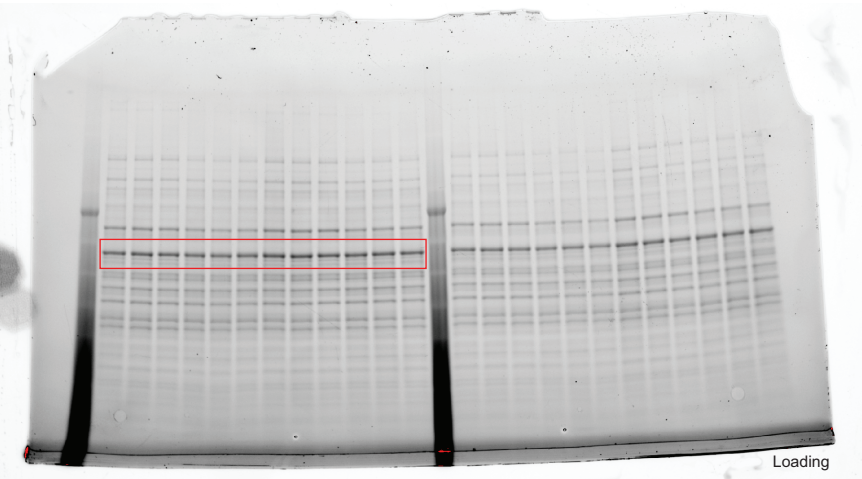

Supplement: fig3-data1 [file elife-89606-fig3-data1-v1.zip]
