# Supplementary material for: Identification of ERAD-dependent degrons for the endoplasmic reticulum lumen
Source: eLife journal article supplement (doi:10.7554/elife.89606), 2023-09-05

Figure 4. DegV1 functions as an ER degron in mammalian cells.

A

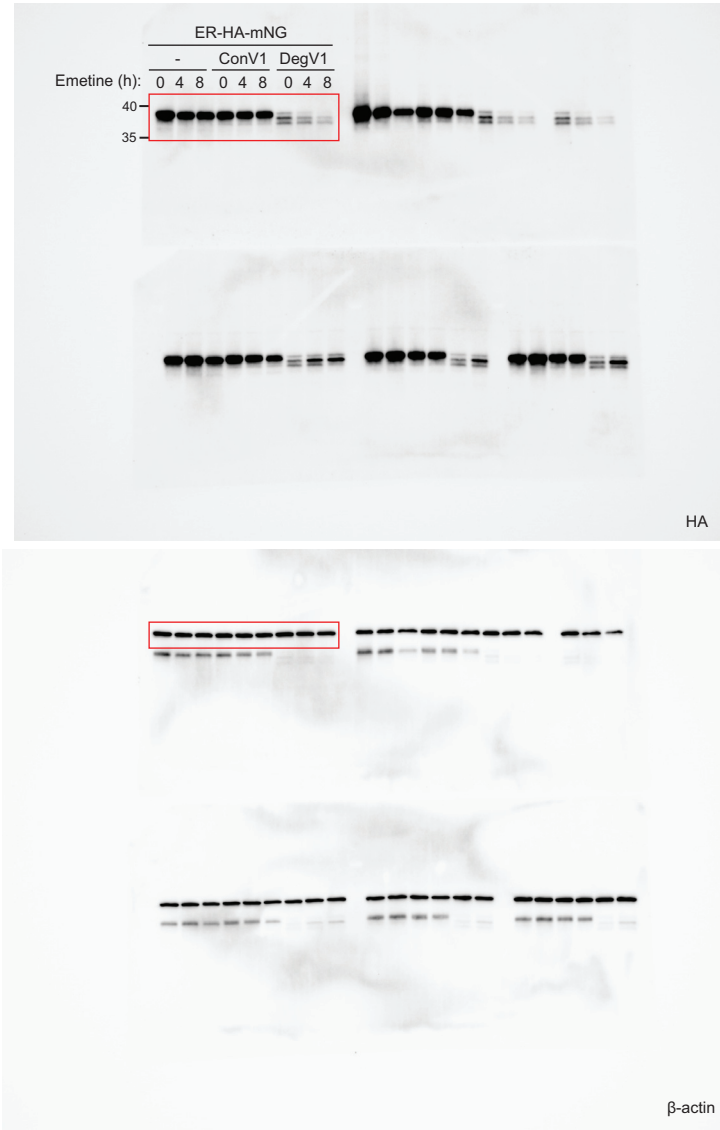

Figure 4. DegV1 functions as an ER degron in mammalian cells.

C

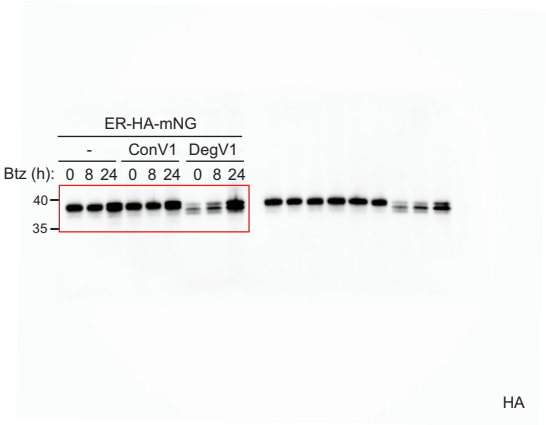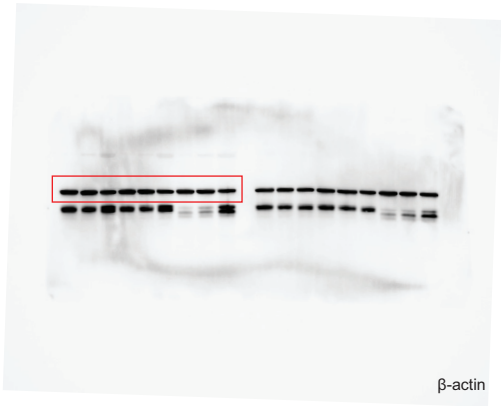

Figure 4. DegV1 functions as an ER degron in mammalian cells.

E

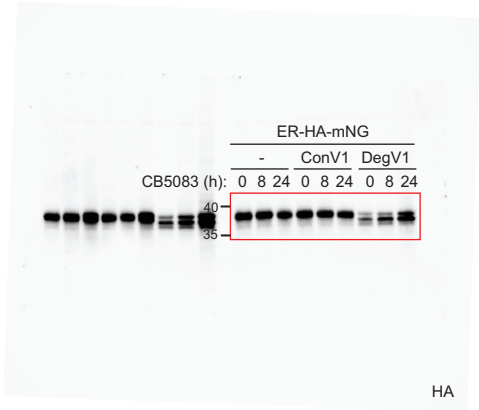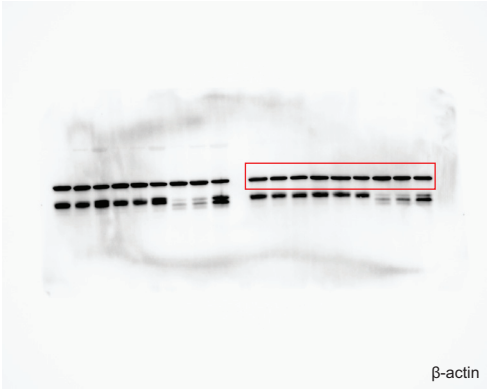

Figure 4. DegV1 functions as an ER degron in mammalian cells.

G

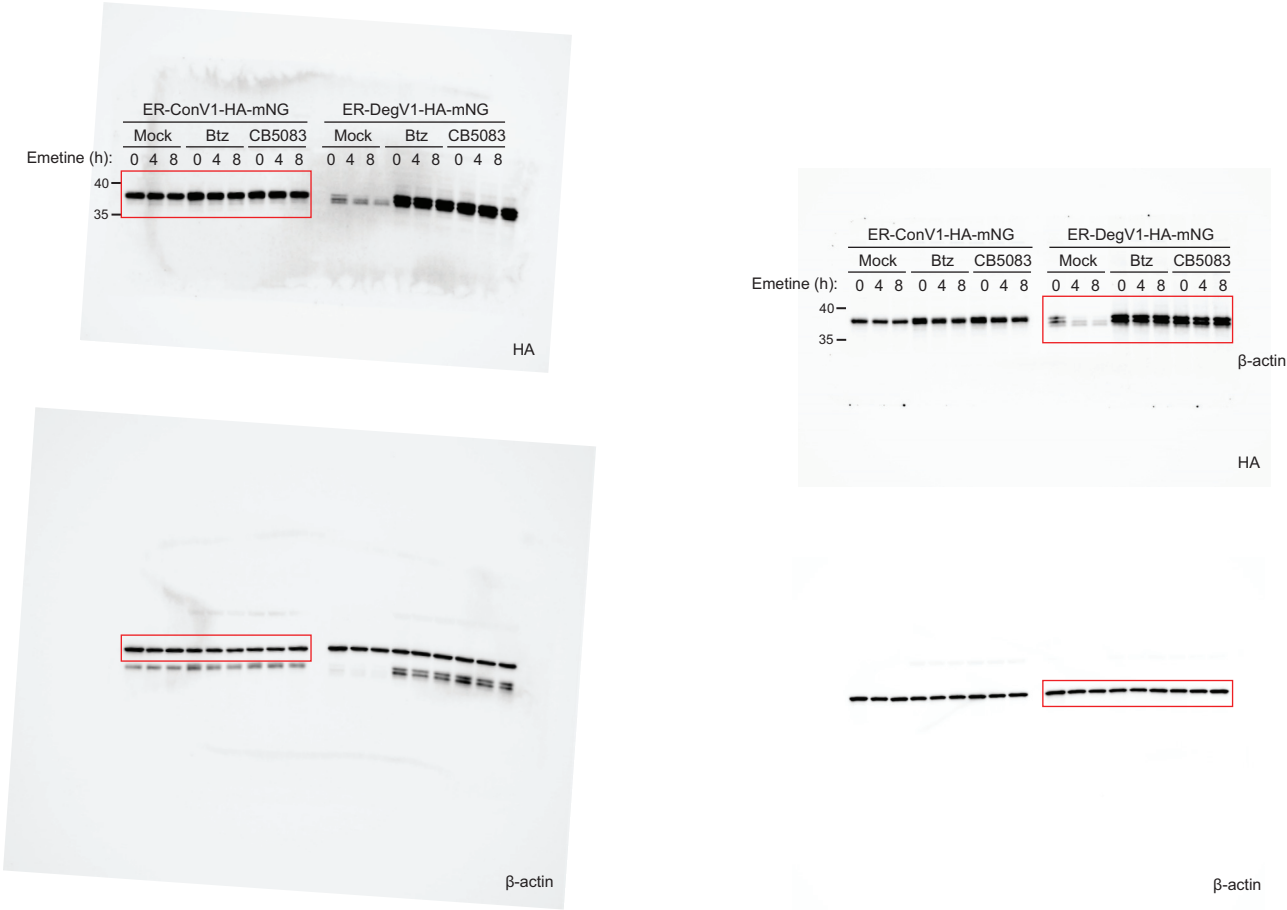

Figure 4. DegV1 functions as an ER degron in mammalian cells.

H

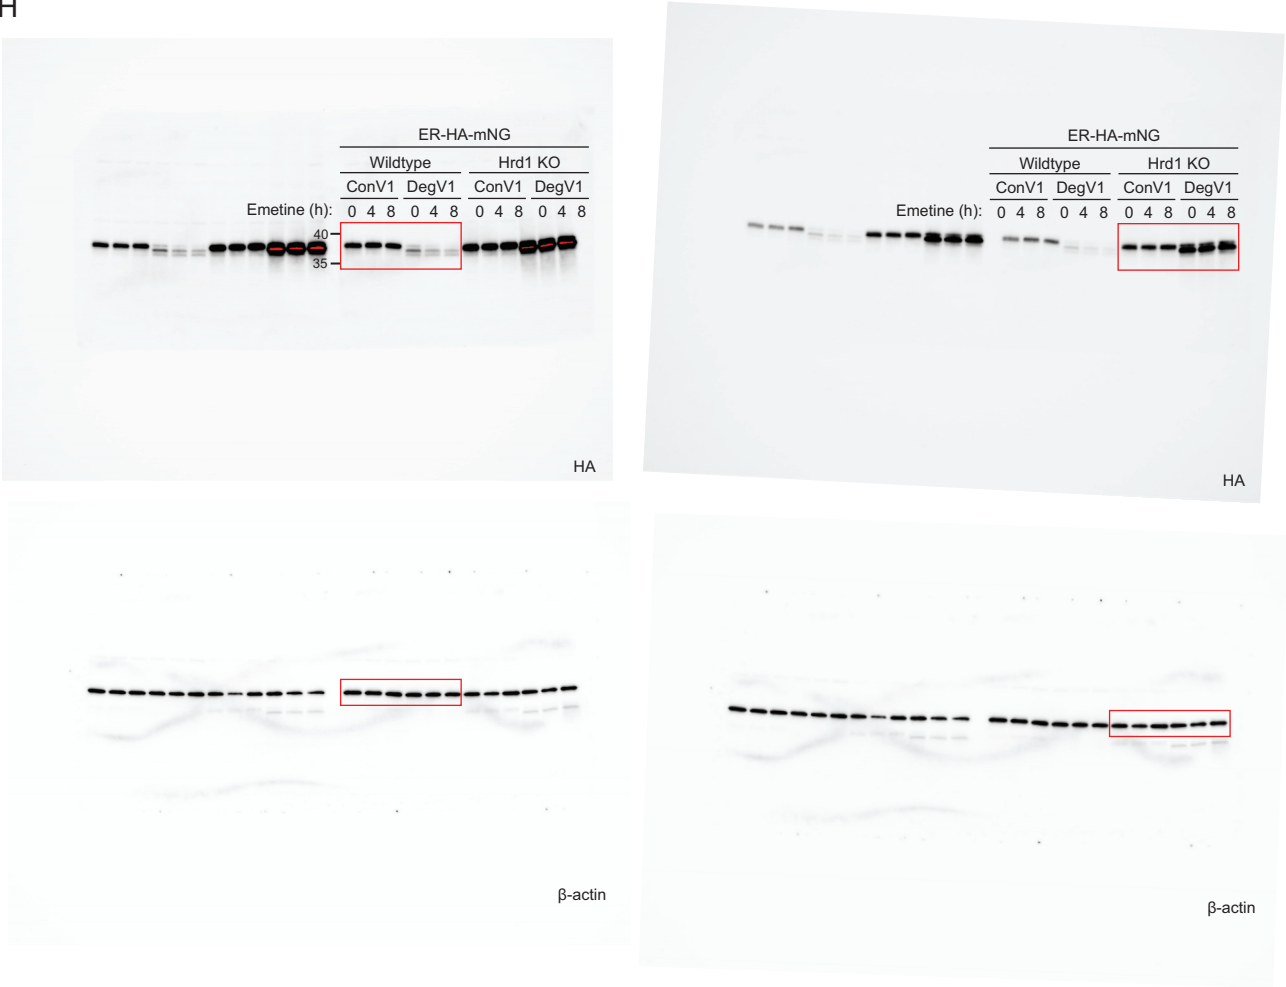

Supplement: fig4-data1 [file elife-89606-fig4-data1-v1.zip]
