# Supplementary material for: Identification of ERAD-dependent degrons for the endoplasmic reticulum lumen
Source: eLife. 2024 Nov 12;12:RP89606. doi: 10.7554/eLife.89606 (PMC11556787; doi:10.7554/eLife.89606)
Supplement: Figure 1—source data 3. [file elife-89606-fig1-data3.xlsx]

## Sheet: Sheet1
Figure 1D
	Timer	KHN
Replicate 1	2.029	1.069
Replicate 2	2.123	0.9711
Replicate 3	1.699	1.133
Replicate 4	2.267	1.141
Mean	2.0295	1.07852
Figure 1H
	Timer	KHN	IHPYW	IWRGR	IYTLE	LHQLY	LWGNH	LYTMR	IITNV	GNRWG	LQKGA	QFVRE	KFGLL	TPLCR
Replicate 1	1	0	0.568886	0.895122	0.197203	0.656761			1.09534	1.40998	1.39091	1.08104	1.28285	1.12236
Replicate 2	1	0	0.449143	0.859592	0.596735	0.541224	0.750204	0.825306	1.01959	1.44082		1.45061	1.01306	1.38204
Replicate 3	1	0	0.153779	0.467487	0.497364	0.641476	0.347979	0.507909	0.527241	0.739895	0.959578	1.14675	0.855009	1.16784
Mean	1	0	0.390602	0.740733	0.430434	0.613154	0.549091	0.666607	0.880726	1.1969	1.17524	1.22613	1.05031	1.22408
Figure 1J
	Timer	KHN	IHPYW	2X-IHPYW	4X-IHPYW	GNRWG	2X-GNRWG	4X-GNRWG
Replicate 1	0.95549	0.0463564	0.41001	0.333628	0.166627	1.34377	1.41858	0.980113
Replicate 2	1.04451	-0.0463564	0.446944	0.370796	0.227236	1.26232	1.45841	1.05398
Replicate 3	1	-0.00353982	0.529204		0.115929		1.59027	1.26903
Replicate 4	1	0.00353982	0.454867		0.107965		1.4292	1.33628
Mean	1	2.60209e-17	0.460256	0.352212	0.154439	1.30304	1.47412	1.15985
