# Supplementary material for: Identification of ERAD-dependent degrons for the endoplasmic reticulum lumen
Source: eLife. 2024 Nov 12;12:RP89606. doi: 10.7554/eLife.89606 (PMC11556787; doi:10.7554/eLife.89606)
Supplement: Figure 2—figure supplement 2—source data 3. [file elife-89606-fig2-figsupp2-data3.xlsx]

## Sheet: Sheet1
Figure 2-figure supplement 2B
	pdr5Δ+EtOH 0min	pdr5Δ+EtOH 45min	pdr5Δ+EtOH 90min	pdr5Δ+Btz 0min	pdr5Δ+Btz 45min	pdr5Δ+Btz 90min	hrd1Δpdr5Δ+EtOH 0min	hrd1Δpdr5Δ+EtOH 45min	hrd1Δpdr5Δ+EtOH 90min	hrd1Δpdr5Δ+Btz 0min	hrd1Δpdr5Δ+Btz 45min	hrd1Δpdr5Δ+Btz 90min
Replicate 1	1	0.278757	0.186269	1	0.766698	0.884613	1	0.294088	0.13813	1	0.874667	0.824593
Replicate 2	1	0.218416	0.186374	1	0.746202	0.575052	1	0.165526	0.124924	1	0.667181	0.401667
Replicate 3	1	0.183552	0.144606	1	0.990706	1.00848	1	0.178958	0.122134	1	0.887141	0.83313
Mean	1	0.226908	0.172416	1	0.834535	0.822714	1	0.212857	0.128396	1	0.809663	0.686463
