# Supplementary material for: Identification of ERAD-dependent degrons for the endoplasmic reticulum lumen
Source: eLife. 2024 Nov 12;12:RP89606. doi: 10.7554/eLife.89606 (PMC11556787; doi:10.7554/eLife.89606)
Supplement: Figure 2—source data 3. [file elife-89606-fig2-data3.xlsx]

## Sheet: Sheet1
Figure 2H
	pdr5Δ+EtOH 0min	pdr5Δ+EtOH 45min	pdr5Δ+EtOH 90min	pdr5Δ+Btz 0min	pdr5Δ+Btz 45min	pdr5Δ+Btz 90min	hrd1Δpdr5Δ+EtOH 0min	hrd1Δpdr5Δ+EtOH 45min	hrd1Δpdr5Δ+EtOH 90min	hrd1Δpdr5Δ+Btz 0min	hrd1Δpdr5Δ+Btz 45min	hrd1Δpdr5Δ+Btz 90min
Replicate 1	1	0.273377	0.181621	1	0.881705	0.820568	1	0.896756	0.811286	1	1.00341	0.998277
Replicate 2	1	0.416441	0.18186	1	0.900892	0.801784	1	0.998687	0.86345	1	0.887542	0.943274
Replicate 3	1	0.32794	0.241523	1	0.956976	0.902411	1	0.968532	0.837422	1	0.939105	0.835381
Mean	1	0.339252	0.201668	1	0.913191	0.841588	1	0.954659	0.837386	1	0.943351	0.925644
