# Supplementary material for: Identification of ERAD-dependent degrons for the endoplasmic reticulum lumen
Source: eLife. 2024 Nov 12;12:RP89606. doi: 10.7554/eLife.89606 (PMC11556787; doi:10.7554/eLife.89606)
Supplement: Figure 4—source data 3. [file elife-89606-fig4-data3.xlsx]

## Sheet: Sheet1
Figure 4B
	ER-HA-mNG 0hr	ER-HA-mNG 4hr	ER-HA-mNG 8hr	ER-ConV1-HA-mNG 0hr	ER-ConV1-HA-mNG 4hr	ER-ConV1-HA-mNG 8hr	ER-DegV1-HA-mNG 0hr	ER-DegV1-HA-mNG 4hr	ER-DegV1-HA-mNG 8hr
Replicate 1	1	0.872398	0.677806	1	0.839319	0.669969	1	0.408149	0.232142
Replicate 2	1	0.848681	0.861666	1	0.855017	0.777215	1	0.585488	0.371225
Replicate 3	1	1.08557	0.93886	1	0.796523	0.799442	1	0.49374	0.345728
Mean	1	0.935548	0.826111	1	0.830286	0.748875	1	0.495792	0.316365
Figure 4D
	ER-HA-mNG 0hr	ER-HA-mNG 8hr	ER-HA-mNG 24hr	ER-ConV1-HA-mNG 0hr	ER-ConV1-HA-mNG 8hr	ER-ConV1-HA-mNG 24hr	ER-DegV1-HA-mNG 0hr	ER-DegV1-HA-mNG 8hr	ER-DegV1-HA-mNG 24hr
Replicate 1	1	0.972057	1.46145	0.997072	1.02783	1.55911	0.318438	0.469088	1.36593
Replicate 2	1	1.4258	1.93226	1.44768	1.20281	2.17648	0.443369	1.0959	2.06278
Replicate 3	1	1.00492	1.3707	1.02921	1.05493	1.65829	0.388652	0.804425	1.87184
Mean	1	1.13426	1.58814	1.15799	1.09519	1.79796	0.383486	0.789804	1.76685
Figure 4F
	ER-HA-mNG 0hr	ER-HA-mNG 8hr	ER-HA-mNG 24hr	ER-ConV1-HA-mNG 0hr	ER-ConV1-HA-mNG 8hr	ER-ConV1-HA-mNG 24hr	ER-DegV1-HA-mNG 0hr	ER-DegV1-HA-mNG 8hr	ER-DegV1-HA-mNG 24hr
Replicate 1	1	0.85495	0.896086	0.905501	0.863485	0.86107	0.277718	0.529749	0.846404
Replicate 2	1	0.959116	0.869061	0.94977	0.837809	0.760217	0.309806	0.561265	0.991473
Replicate 3	1	0.994034	1.25128	1.04593	0.924714	1.00136	0.336676	0.529721	0.981509
Mean	1	0.936033	1.00548	0.967069	0.875336	0.874214	0.308067	0.540245	0.939795
Figure 4I
	WT cells ER-ConV1-HA-mNG 0hr	WT cells ER-ConV1-HA-mNG 4hr	WT cells ER-ConV1-HA-mNG 8hr	WT cells ER-DegV1-HA-mNG 0hr	WT cells ER-DegV1-HA-mNG 4hr	WT cells ER-DegV1-HA-mNG 8hr	H1KO cells ER-ConV1-HA-mNG 0hr	H1KO cells ER-ConV1-HA-mNG 4hr	H1KO cells ER-ConV1-HA-mNG 8hr	H1KO cells ER-DegV1-HA-mNG 0hr	H1KO cells ER-DegV1-HA-mNG 4hr	H1KO cells ER-DegV1-HA-mNG 8hr
Replicate 1	1	1.04684	1.09485	1	0.300718	0.285076	1	1.02666	1.07891	1	0.875559	0.975021
Replicate 2	1	1.10113	1.19706	1	0.550919	0.382326	1	1.06477	1.11335	1	0.922088	1.156
Replicate 3	1	1.22253	1.06871	1	0.415251	0.259745	1	1.17787	0.893913	1	1.18082	1.07422
Mean	1	1.1235	1.12021	1	0.422296	0.309049	1	1.08977	1.02872	1	0.992821	1.06841
