# Supplementary material for: Identification of ERAD-dependent degrons for the endoplasmic reticulum lumen
Source: eLife. 2024 Nov 12;12:RP89606. doi: 10.7554/eLife.89606 (PMC11556787; doi:10.7554/eLife.89606)
Supplement: Source data 1. — Illumina sequencing reads were trimmed, translated into amino acids, and analyzed as described in the Methods section. [file elife-89606-data1.xlsx]

## Sheet: HeatMaps
	AA Frequency Sorted Bin vs Predicted Codon Frequency								AA Frequency vs Library Codon Frequency							AA Frequency Sorted Bin vs Predicted Codon Frequency										AA Frequency vs Library Codon Frequency
	Amino Acids	POS 1	POS 2	POS 3	POS 4	POS 5			Amino Acids	POS 1	POS 2	POS 3	POS 4	POS 5		AA	P1	P2	P3	P4	P5					AA	P1	P2	P3	P4	P5
	A	0.405956	0.894979	0.669537	0.576285	0.750808			A	0.949043	1.00617	1.00774	0.860736	0.903352		A	0.405956	0.894979	0.669537	0.576285	0.750808					A	0.949043	1.00617	1.00774	0.860736	0.903352
	I	3.78306	1.04501	1.39618	1.4457	0.425458			I	2.67973	0.952549	1.2086	1.25518	1.21953		I	3.78306	1.04501	1.39618	1.4457	0.425458					I	2.67973	0.952549	1.2086	1.25518	1.21953
	L	1.58255	0.791677	1.00587	1.24429	1.26692			L	1.52264	1.02873	1.17576	1.29695	1.27508		L	1.58255	0.791677	1.00587	1.24429	1.26692					L	1.52264	1.02873	1.17576	1.29695	1.27508
	M	1.14618	1.02877	1.01599	1.24602	0.649369			M	1.39194	1.09875	1.32462	1.30224	1.38329		M	1.14618	1.02877	1.01599	1.24602	0.649369					M	1.39194	1.09875	1.32462	1.30224	1.38329
	V	1.29754	1.03356	1.04973	0.873613	1.36863			V	1.56843	0.994841	1.14067	1.04067	1.08828		V	1.29754	1.03356	1.04973	0.873613	1.36863					V	1.56843	0.994841	1.14067	1.04067	1.08828
	F	1.06191	1.28556	1.41256	1.67494	1.58029			F	1.26401	1.44215	1.26733	1.55833	1.31492		F	1.06191	1.28556	1.41256	1.67494	1.58029					F	1.26401	1.44215	1.26733	1.55833	1.31492
	W	0.638187	1.3882	1.11263	1.28676	1.88022			W	0.949554	1.919	1.58298	1.52931	1.66204		W	0.638187	1.3882	1.11263	1.28676	1.88022					W	0.949554	1.919	1.58298	1.52931	1.66204
	Y	0.626605	1.83708	1.82151	1.62462	2.10466			Y	1.11284	1.82924	1.34995	1.41209	1.45988		Y	0.626605	1.83708	1.82151	1.62462	2.10466					Y	1.11284	1.82924	1.34995	1.41209	1.45988
	C	0.751207	0.750409	1.06631	0.868621	1.22965			C	0.956999	1.07945	1.13573	1.01533	0.977271		C	0.751207	0.750409	1.06631	0.868621	1.22965					C	0.956999	1.07945	1.13573	1.01533	0.977271
	G	0.561509	1.04834	0.914348	0.676726	1.31072			G	0.848418	1.13205	1.07119	0.944697	0.963158		G	0.561509	1.04834	0.914348	0.676726	1.31072					G	0.848418	1.13205	1.07119	0.944697	0.963158
	P	1.08428	1.28935	0.783356	1.07869	1.06271			P	0.705058	1.13332	0.796802	0.743595	0.861727		P	1.08428	1.28935	0.783356	1.07869	1.06271					P	0.705058	1.13332	0.796802	0.743595	0.861727
	N	1.12701	1.56072	1.48604	1.40737	0.255594			N	0.540727	0.906726	0.794106	0.826251	0.763508		N	1.12701	1.56072	1.48604	1.40737	0.255594					N	0.540727	0.906726	0.794106	0.826251	0.763508
	Q	1.26679	1.11583	1.33548	1.4469	2.15099			Q	0.730518	0.965552	0.929656	0.966656	0.940566		Q	1.26679	1.11583	1.33548	1.4469	2.15099					Q	0.730518	0.965552	0.929656	0.966656	0.940566
	S	0.4622	0.759994	0.815905	0.829616	0.634859			S	0.743515	0.821822	0.841807	0.838568	0.779892		S	0.4622	0.759994	0.815905	0.829616	0.634859					S	0.743515	0.821822	0.841807	0.838568	0.779892
	T	1.0713	1.10485	0.972257	0.96986	0.153956			T	0.737198	0.71014	0.838988	0.77714	0.941431		T	1.0713	1.10485	0.972257	0.96986	0.153956					T	0.737198	0.71014	0.838988	0.77714	0.941431
	D	0.446092	0.864627	0.898174	0.771575	1.45249			D	0.60592	0.68787	0.819026	0.870569	0.773529		D	0.446092	0.864627	0.898174	0.771575	1.45249					D	0.60592	0.68787	0.819026	0.870569	0.773529
	E	0.536748	0.986833	0.946497	0.843062	1.77997			E	0.634059	0.764043	0.862083	0.970898	0.814418		E	0.536748	0.986833	0.946497	0.843062	1.77997					E	0.634059	0.764043	0.862083	0.970898	0.814418
	H	1.48524	1.9521	1.68293	1.67135	1.8291			H	0.78989	1.55461	1.14594	1.03666	0.907744		H	1.48524	1.9521	1.68293	1.67135	1.8291					H	0.78989	1.55461	1.14594	1.03666	0.907744
	K	0.936513	1.10025	1.3255	1.27957	0.381395			K	0.521915	0.736958	0.704933	0.808447	0.895653		K	0.936513	1.10025	1.3255	1.27957	0.381395					K	0.521915	0.736958	0.704933	0.808447	0.895653
	R	0.739892	0.791144	0.874212	0.801661	0.777965			R	0.722582	0.919712	0.992118	0.982221	0.921335		R	0.739892	0.791144	0.874212	0.801661	0.777965					R	0.722582	0.919712	0.992118	0.982221	0.921335
																AA Frequency Library vs Predicted Codon Frequency
																AA	P1	P2	P3	P4	P5
																A	0.427753	0.889495	0.664395	0.669526	0.831136
																I	1.02396	0.860208	0.881158	0.816172	0.844389
																L	2.08425	1.72127	1.87134	1.70331	0.334763
																M	0.736222	1.25696	1.09664	0.886288	1.87775
																V	0.784961	0.695178	0.938875	0.855505	1.25825
																F	0.846527	1.29159	1.09792	0.868331	2.18558
																W	1.7341	1.15564	1.43653	1.49681	2.28691
																Y	0.66183	0.926049	0.853581	0.716341	1.36086
																C	1.88032	1.25568	1.4686	1.61225	2.01499
																G	1.41173	1.09706	1.15521	1.15179	0.348872
																P	1.03935	0.76957	0.855505	0.959397	0.9936
																N	1.79438	1.49297	1.88032	1.58275	0.425829
																Q	0.82344	0.93631	0.767005	0.956832	0.469438
																S	0.840114	0.891418	1.11459	1.07483	1.20181
																T	1.53786	1.13768	0.983126	1.45064	1.23324
																D	0.621641	0.924767	0.969231	0.989325	0.814034
																E	1.4532	1.55581	1.15884	1.24799	0.163534
																H	0.672091	0.723396	0.702874	0.841396	1.13127
																K	0.563069	1.00429	1.34931	1.15051	1.44166
																R	0.827288	1.03892	0.920277	0.839473	1.25761

## Sheet: Library data
TargetSequence	Reads	AvgQScore	Type	Pct	IndelLength	# of **	# of AA translated	TargetAA	AA sequence starting from 5AA	5AA sequence	Position 1-4 AA	Position 2-5 AA	Pos 3 and 4 AA	1st position AA	2nd position AA	3rd position AA	4th position AA	5th position AA	ReferenceAA	WideTargetSeq	WideReference	TargetLeftFlank	TargetRightFlank
ATGAGATTTCCTT-AATTTTTACTGCTGTTTTATTCGCAGCATCCTCCGCATTAGCTGCTAGCCtgatctgtcacta-------------AGCAAGCGGTGTGAGCAAGGGCGAGGAGGATAACATGGCCATCATCAAGGAGTTCATGCGCTTCAAGGTGCACATGGAGGGCTCCGTGAACGGC	1	21	Insertion and Deletion	0	-1	Total # of reads	5	MRFP*											MRFPSIFTAVLFAASSALAASKKKKKASGVSKGEEDNMAIIKEFMRFKVHMEGSVNG	ATGAGATTTCCTT-AATTTTTACTGCTGTTTTATTCGCAGCATCCTCCGCATTAGCTGCTAGCCTGATCTGTCACTA-------------AGCAAGCGGTGTGAGCAAGGGCGAGGAGGATAACATGGCCATCATCAAGGAGTTCATGCGCTTCAAGGTGCACATGGAGGGCTCCGTGAACGGC	ATGAGATTTCCTTCAATTTTTACTGCTGTTTTATTCGCAGCATCCTCCGCATTAGCTGCTAGCAAAAAAAAAAAAAAAGCAAGCGGTGTGAGCAAGGGCGAGGAGGATAACATGGCCATCATCAAGGAGTTCATGCGCTTCAAGGTGCACATGGAGGGCTCCGTGAACGGC
ATGAGATTTCCTTAAATTTTTACTGCTGTTTTATTCGCAGCATCCTCCGCATTAGCTGCTAG-----------ACAGAGcagggcgtgtgCAAGCGGTGTGAGCAAGGGCGAGGAGGATAACATGGCCATCATCAAGGAGTTCATGCGCTTCGAGGTGCACATGGAGGGCTCCGTGAACGGC	1	22	Insertion and Deletion	0	0	44394	5	MRFP*											MRFPSIFTAVLFAASSALAASKKKKKASGVSKGEEDNMAIIKEFMRFKVHMEGSVNG	ATGAGATTTCCTTAAATTTTTACTGCTGTTTTATTCGCAGCATCCTCCGCATTAGCTGCTAG-----------ACAGAGCAGGGCGTGTGCAAGCGGTGTGAGCAAGGGCGAGGAGGATAACATGGCCATCATCAAGGAGTTCATGCGCTTCGAGGTGCACATGGAGGGCTCCGTGAACGGC	ATGAGATTTCCTTCAATTTTTACTGCTGTTTTATTCGCAGCATCCTCCGCATTAGCTGCTAGCAAAAAAAAAAAAAAAGCAAGCGGTGTGAGCAAGGGCGAGGAGGATAACATGGCCATCATCAAGGAGTTCATGCGCTTCAAGGTGCACATGGAGGGCTCCGTGAACGGC
ATGAGATTTCCTTAAATTTTTACTGCTGTTTTATTCGCAGCATCCTCCGCATTAGCTGCTAGC-------------GATcggcctctttgcgCAAGCGGTGTGAGCAAGGGCGAGGAGGATAACATGGCCATCATCAAGGAGTTCATGCGCTTCAAGGTGCACATGGAGGGCTCCGTGAACGGC	1	36	Insertion and Deletion	0	0	# of stops	5	MRFP*											MRFPSIFTAVLFAASSALAASKKKKKASGVSKGEEDNMAIIKEFMRFKVHMEGSVNG	ATGAGATTTCCTTAAATTTTTACTGCTGTTTTATTCGCAGCATCCTCCGCATTAGCTGCTAGC-------------GATCGGCCTCTTTGCGCAAGCGGTGTGAGCAAGGGCGAGGAGGATAACATGGCCATCATCAAGGAGTTCATGCGCTTCAAGGTGCACATGGAGGGCTCCGTGAACGGC	ATGAGATTTCCTTCAATTTTTACTGCTGTTTTATTCGCAGCATCCTCCGCATTAGCTGCTAGCAAAAAAAAAAAAAAAGCAAGCGGTGTGAGCAAGGGCGAGGAGGATAACATGGCCATCATCAAGGAGTTCATGCGCTTCAAGGTGCACATGGAGGGCTCCGTGAACGGC
ATGAGATCTCCTTCAATTTTTACTGCTGTTTAATTCGCAGCATCCTCCGCATTAGCTGCTAGC----------CTAAACgcgagcctggCAAGCGGTGTGAGCAAGGGCGAGGAGGATAACATGGCCAGCATCAAGGAGTTCATGCGCTTCAAGGTGCACATGGAGGGATCCGTGAACGGC	1	27	Insertion and Deletion	0	0	17539	11	MRSPSIFTAV*											MRFPSIFTAVLFAASSALAASKKKKKASGVSKGEEDNMAIIKEFMRFKVHMEGSVNG	ATGAGATCTCCTTCAATTTTTACTGCTGTTTAATTCGCAGCATCCTCCGCATTAGCTGCTAGC----------CTAAACGCGAGCCTGGCAAGCGGTGTGAGCAAGGGCGAGGAGGATAACATGGCCAGCATCAAGGAGTTCATGCGCTTCAAGGTGCACATGGAGGGATCCGTGAACGGC	ATGAGATTTCCTTCAATTTTTACTGCTGTTTTATTCGCAGCATCCTCCGCATTAGCTGCTAGCAAAAAAAAAAAAAAAGCAAGCGGTGTGAGCAAGGGCGAGGAGGATAACATGGCCATCATCAAGGAGTTCATGCGCTTCAAGGTGCACATGGAGGGCTCCGTGAACGGC
ATGAGATTTCCTTCAATTTTTACTGCTGTTTAATTCGCAGCATCCTCCGCATTAGCTGCTAGC---------GAATTCGCAAGCGGTGTGAGCAAGGGCGAGGAGGATAACATGGCCATCATCAAGGAGTTCATGCGCTTCAAGGTGCACATGGAGGGCTCCGTGAACGGC	1	33	Deletion	0	-9	Fraction target seq with STOP	11	MRFPSIFTAV*											MRFPSIFTAVLFAASSALAASKKKKKASGVSKGEEDNMAIIKEFMRFKVHMEGSVNG	ATGAGATTTCCTTCAATTTTTACTGCTGTTTAATTCGCAGCATCCTCCGCATTAGCTGCTAGC---------GAATTCGCAAGCGGTGTGAGCAAGGGCGAGGAGGATAACATGGCCATCATCAAGGAGTTCATGCGCTTCAAGGTGCACATGGAGGGCTCCGTGAACGGC	ATGAGATTTCCTTCAATTTTTACTGCTGTTTTATTCGCAGCATCCTCCGCATTAGCTGCTAGCAAAAAAAAAAAAAAAGCAAGCGGTGTGAGCAAGGGCGAGGAGGATAACATGGCCATCATCAAGGAGTTCATGCGCTTCAAGGTGCACATGGAGGGCTCCGTGAACGGC
ATGAGATTTCCTTCAATTTTTACTGCTGTTTGATTCGCAGCATCCTCCGCATTAGCTGCTAGCCCATCAGTAACAAGAGCAAGCGGTGTGAGCAAGGGCGAGGAGGATAACATGGCCATCATCAAGGAGTTCATGCGCTTCAAGGTGCACATGGAGGGCTCCGTGAACGGC	1	28	9 Base Changes	0	0	0.411936	11	MRFPSIFTAV*											MRFPSIFTAVLFAASSALAASKKKKKASGVSKGEEDNMAIIKEFMRFKVHMEGSVNG	ATGAGATTTCCTTCAATTTTTACTGCTGTTTGATTCGCAGCATCCTCCGCATTAGCTGCTAGCCCATCAGTAACAAGAGCAAGCGGTGTGAGCAAGGGCGAGGAGGATAACATGGCCATCATCAAGGAGTTCATGCGCTTCAAGGTGCACATGGAGGGCTCCGTGAACGGC	ATGAGATTTCCTTCAATTTTTACTGCTGTTTTATTCGCAGCATCCTCCGCATTAGCTGCTAGCAAAAAAAAAAAAAAAGCAAGCGGTGTGAGCAAGGGCGAGGAGGATAACATGGCCATCATCAAGGAGTTCATGCGCTTCAAGGTGCACATGGAGGGCTCCGTGAACGGC
ATGAGATTTCCTTCAATTTTTACTGCTGTTTTATTCGCAGCATCCTCCGCA-TAGCTGCTAGC--------------AGgccagagttttctgCAAGCGGTGTGAGCAAGGGCGAGGAGGATAACATGGCCATCATCAAGGAGTTCATGCGCTTCAAGGTGCACATGGAGGGCTCCGTGAACGGC	2	31	Insertion and Deletion	0	-1		18	MRFPSIFTAVLFAASSA*											MRFPSIFTAVLFAASSALAASKKKKKASGVSKGEEDNMAIIKEFMRFKVHMEGSVNG	ATGAGATTTCCTTCAATTTTTACTGCTGTTTTATTCGCAGCATCCTCCGCA-TAGCTGCTAGC--------------AGGCCAGAGTTTTCTGCAAGCGGTGTGAGCAAGGGCGAGGAGGATAACATGGCCATCATCAAGGAGTTCATGCGCTTCAAGGTGCACATGGAGGGCTCCGTGAACGGC	ATGAGATTTCCTTCAATTTTTACTGCTGTTTTATTCGCAGCATCCTCCGCATTAGCTGCTAGCAAAAAAAAAAAAAAAGCAAGCGGTGTGAGCAAGGGCGAGGAGGATAACATGGCCATCATCAAGGAGTTCATGCGCTTCAAGGTGCACATGGAGGGCTCCGTGAACGGC
ATGAGATTTCCTTCAATTTTTACTGCTGTTTTATTCGCAGCATCCTCCGCA-TAGCTGCTAGCTAAATTAATCAATGGGCAAGCGGTGTGAGCAAGGGCGAGGAGGATAACATGGCCATCATCAAGGAGTTCATGCGCTTCAAGGTGCACATGGAGGGCTCCGTGAACGGC	2	29	Deletion	0	-1	# of indels	18	MRFPSIFTAVLFAASSA*											MRFPSIFTAVLFAASSALAASKKKKKASGVSKGEEDNMAIIKEFMRFKVHMEGSVNG	ATGAGATTTCCTTCAATTTTTACTGCTGTTTTATTCGCAGCATCCTCCGCA-TAGCTGCTAGCTAAATTAATCAATGGGCAAGCGGTGTGAGCAAGGGCGAGGAGGATAACATGGCCATCATCAAGGAGTTCATGCGCTTCAAGGTGCACATGGAGGGCTCCGTGAACGGC	ATGAGATTTCCTTCAATTTTTACTGCTGTTTTATTCGCAGCATCCTCCGCATTAGCTGCTAGCAAAAAAAAAAAAAAAGCAAGCGGTGTGAGCAAGGGCGAGGAGGATAACATGGCCATCATCAAGGAGTTCATGCGCTTCAAGGTGCACATGGAGGGCTCCGTGAACGGC
ATGAGATTTCCTTCAATTTTTACTGCTGTTTTATTCGCAGCATCCTCCGCTTAAGCTGCTAGCATGAGAGAGTACTTCGCAAGCGGTGTGAGCAAGGGCGAGGAGGATAACATGGCCATCATCAAGGAGTTCATGCGCTTCAAGGTGCACATGGAGGGCTCCGTGAACGGC	2	31	12 Base Changes	0	0	3619	18	MRFPSIFTAVLFAASSA*											MRFPSIFTAVLFAASSALAASKKKKKASGVSKGEEDNMAIIKEFMRFKVHMEGSVNG	ATGAGATTTCCTTCAATTTTTACTGCTGTTTTATTCGCAGCATCCTCCGCTTAAGCTGCTAGCATGAGAGAGTACTTCGCAAGCGGTGTGAGCAAGGGCGAGGAGGATAACATGGCCATCATCAAGGAGTTCATGCGCTTCAAGGTGCACATGGAGGGCTCCGTGAACGGC	ATGAGATTTCCTTCAATTTTTACTGCTGTTTTATTCGCAGCATCCTCCGCATTAGCTGCTAGCAAAAAAAAAAAAAAAGCAAGCGGTGTGAGCAAGGGCGAGGAGGATAACATGGCCATCATCAAGGAGTTCATGCGCTTCAAGGTGCACATGGAGGGCTCCGTGAACGGC
ATGAGATTGCCTTCAATTTTTACTGCTGTTTTATTCGCAGCATCCTCCGCATGAGCTGCTAGCGACTATACCAAATAGGCAAGCGGTGTGAGCAAGGGCGAGGAGGATAACATGGCCATCATCAAGGAGTTCATGCGCTTCAAGGTGCACATGGAGGGCTCCGTGAACGGC	1	29	10 Base Changes	0	0	Fraction target with indels	18	MRLPSIFTAVLFAASSA*											MRFPSIFTAVLFAASSALAASKKKKKASGVSKGEEDNMAIIKEFMRFKVHMEGSVNG	ATGAGATTGCCTTCAATTTTTACTGCTGTTTTATTCGCAGCATCCTCCGCATGAGCTGCTAGCGACTATACCAAATAGGCAAGCGGTGTGAGCAAGGGCGAGGAGGATAACATGGCCATCATCAAGGAGTTCATGCGCTTCAAGGTGCACATGGAGGGCTCCGTGAACGGC	ATGAGATTTCCTTCAATTTTTACTGCTGTTTTATTCGCAGCATCCTCCGCATTAGCTGCTAGCAAAAAAAAAAAAAAAGCAAGCGGTGTGAGCAAGGGCGAGGAGGATAACATGGCCATCATCAAGGAGTTCATGCGCTTCAAGGTGCACATGGAGGGCTCCGTGAACGGC
ATGAGATTTCC-TCAATTTTTACTGCTGTTTTATTCGCAGCATCCTCCGCATTAGCTGCTAGCCAATGACGCAACCCAGCAAGCGGTGTGAGCAAGGGCGAGGAGGATAACATGGCCATCATCAAGGAGTTCATGCGCTTCAAGGTGCACATGGAGGGCTCCGTGAACGGC	1	34	Deletion	0	-1	0.0849989	18	MRFPQFLLLFYSQHPPH*											MRFPSIFTAVLFAASSALAASKKKKKASGVSKGEEDNMAIIKEFMRFKVHMEGSVNG	ATGAGATTTCC-TCAATTTTTACTGCTGTTTTATTCGCAGCATCCTCCGCATTAGCTGCTAGCCAATGACGCAACCCAGCAAGCGGTGTGAGCAAGGGCGAGGAGGATAACATGGCCATCATCAAGGAGTTCATGCGCTTCAAGGTGCACATGGAGGGCTCCGTGAACGGC	ATGAGATTTCCTTCAATTTTTACTGCTGTTTTATTCGCAGCATCCTCCGCATTAGCTGCTAGCAAAAAAAAAAAAAAAGCAAGCGGTGTGAGCAAGGGCGAGGAGGATAACATGGCCATCATCAAGGAGTTCATGCGCTTCAAGGTGCACATGGAGGGCTCCGTGAACGGC
ATGAGATTTCCTTCAA-TTTTACTGCTGTTTTATTCGCAGCATCCTCCGCATTAGCTGCTAGC----------ATACcctaAGtggcggCAAGCGGTGTGAGCAAGGGCGAGGAGGATAACATGGCCATCATCAAGGAGTTCATGCGCTTCAAGGTGCACATGGAGGGCTCCGTGAACGGC	1	35	Insertion and Deletion	0	-1		18	MRFPSILLLFYSQHPPH*											MRFPSIFTAVLFAASSALAASKKKKKASGVSKGEEDNMAIIKEFMRFKVHMEGSVNG	ATGAGATTTCCTTCAA-TTTTACTGCTGTTTTATTCGCAGCATCCTCCGCATTAGCTGCTAGC----------ATACCCTAAGTGGCGGCAAGCGGTGTGAGCAAGGGCGAGGAGGATAACATGGCCATCATCAAGGAGTTCATGCGCTTCAAGGTGCACATGGAGGGCTCCGTGAACGGC	ATGAGATTTCCTTCAATTTTTACTGCTGTTTTATTCGCAGCATCCTCCGCATTAGCTGCTAGCAAAAAAAAAAAAAAAGCAAGCGGTGTGAGCAAGGGCGAGGAGGATAACATGGCCATCATCAAGGAGTTCATGCGCTTCAAGGTGCACATGGAGGGCTCCGTGAACGGC
ATGAGATTTCCTTCAA-TTTTACTGCTGTTTTATTCGCAGCATCCTCCGCATTAGCTGCTAGC----------ATttgactctcaCACGCAAGCGGTGTGAGCAAGGGCGAGGAGGATAACATGGCCATCATCAAGGAGTTCATGCGCTTCAAGGTGCACATGGAGGGCTCCGTGAACGGC	1	34	Insertion and Deletion	0	-1	# of TARGET Seq (# of all rows)	18	MRFPSILLLFYSQHPPH*											MRFPSIFTAVLFAASSALAASKKKKKASGVSKGEEDNMAIIKEFMRFKVHMEGSVNG	ATGAGATTTCCTTCAA-TTTTACTGCTGTTTTATTCGCAGCATCCTCCGCATTAGCTGCTAGC----------ATTTGACTCTCACACGCAAGCGGTGTGAGCAAGGGCGAGGAGGATAACATGGCCATCATCAAGGAGTTCATGCGCTTCAAGGTGCACATGGAGGGCTCCGTGAACGGC	ATGAGATTTCCTTCAATTTTTACTGCTGTTTTATTCGCAGCATCCTCCGCATTAGCTGCTAGCAAAAAAAAAAAAAAAGCAAGCGGTGTGAGCAAGGGCGAGGAGGATAACATGGCCATCATCAAGGAGTTCATGCGCTTCAAGGTGCACATGGAGGGCTCCGTGAACGGC
ATGAGATTTCCTTCAA-TTTTACTGCTGTTTTATTCGCAGCATCCTCCGCATTAGCTGCTAGC---------ACCAAACgccctcgcgCAAGCGGTGTGAGCAAGGGCGAGGAGGATAACATGGCCATCATCAAGGAGTTCATGCGCTTCAAGGTGCACATGGAGGGCTCCGTGAACGGC	1	32	Insertion and Deletion	0	-1	42577	18	MRFPSILLLFYSQHPPH*											MRFPSIFTAVLFAASSALAASKKKKKASGVSKGEEDNMAIIKEFMRFKVHMEGSVNG	ATGAGATTTCCTTCAA-TTTTACTGCTGTTTTATTCGCAGCATCCTCCGCATTAGCTGCTAGC---------ACCAAACGCCCTCGCGCAAGCGGTGTGAGCAAGGGCGAGGAGGATAACATGGCCATCATCAAGGAGTTCATGCGCTTCAAGGTGCACATGGAGGGCTCCGTGAACGGC	ATGAGATTTCCTTCAATTTTTACTGCTGTTTTATTCGCAGCATCCTCCGCATTAGCTGCTAGCAAAAAAAAAAAAAAAGCAAGCGGTGTGAGCAAGGGCGAGGAGGATAACATGGCCATCATCAAGGAGTTCATGCGCTTCAAGGTGCACATGGAGGGCTCCGTGAACGGC
ATGAGATTTCCTTCAA-TTTTACTGCTGTTTTATTCGCAGCATCCTCCGCATTAGCTGCTAGC---------CAACAACcaccgtcggCAAGCGGTGTGAGCAAGGGCGAGGAGGATAACATGGCCATCATCAAGGAGTTCATGCGCTTCAAGGTGCACATGGAGGGCTCCGTGAACGGC	1	34	Insertion and Deletion	0	-1		18	MRFPSILLLFYSQHPPH*											MRFPSIFTAVLFAASSALAASKKKKKASGVSKGEEDNMAIIKEFMRFKVHMEGSVNG	ATGAGATTTCCTTCAA-TTTTACTGCTGTTTTATTCGCAGCATCCTCCGCATTAGCTGCTAGC---------CAACAACCACCGTCGGCAAGCGGTGTGAGCAAGGGCGAGGAGGATAACATGGCCATCATCAAGGAGTTCATGCGCTTCAAGGTGCACATGGAGGGCTCCGTGAACGGC	ATGAGATTTCCTTCAATTTTTACTGCTGTTTTATTCGCAGCATCCTCCGCATTAGCTGCTAGCAAAAAAAAAAAAAAAGCAAGCGGTGTGAGCAAGGGCGAGGAGGATAACATGGCCATCATCAAGGAGTTCATGCGCTTCAAGGTGCACATGGAGGGCTCCGTGAACGGC
ATGAGATTTCCTTCAA-TTTTACTGCTGTTTTATTCGCAGCATCCTCCGCATTAGCTGCTAGC---------GAATTCGCAAGCGGTGTGAGCAAGGGCGAGGAGGATAACATGGCCATCATCAAGGAGTTCATGCGCTTCAAGGTGCACATGGAGGGCTCCGTGAACGGC	1	35	Deletion	0	-10		18	MRFPSILLLFYSQHPPH*											MRFPSIFTAVLFAASSALAASKKKKKASGVSKGEEDNMAIIKEFMRFKVHMEGSVNG	ATGAGATTTCCTTCAA-TTTTACTGCTGTTTTATTCGCAGCATCCTCCGCATTAGCTGCTAGC---------GAATTCGCAAGCGGTGTGAGCAAGGGCGAGGAGGATAACATGGCCATCATCAAGGAGTTCATGCGCTTCAAGGTGCACATGGAGGGCTCCGTGAACGGC	ATGAGATTTCCTTCAATTTTTACTGCTGTTTTATTCGCAGCATCCTCCGCATTAGCTGCTAGCAAAAAAAAAAAAAAAGCAAGCGGTGTGAGCAAGGGCGAGGAGGATAACATGGCCATCATCAAGGAGTTCATGCGCTTCAAGGTGCACATGGAGGGCTCCGTGAACGGC
ATGAGATTTCCTTCAA-TTTTACTGCTGTTTTATTCGCAGCATCCTCCGCATTAGCTGCTAGCGATGATATCAAGTTTGCAAGCGGTGTGAGCAAGGGCGAGGAGGATAACATGGCCATCATCAAGGAGTTCATGCGCTTCAAGGTGCACATGGAGGGCTCCGTGAACGGC	1	34	Deletion	0	-1		18	MRFPSILLLFYSQHPPH*											MRFPSIFTAVLFAASSALAASKKKKKASGVSKGEEDNMAIIKEFMRFKVHMEGSVNG	ATGAGATTTCCTTCAA-TTTTACTGCTGTTTTATTCGCAGCATCCTCCGCATTAGCTGCTAGCGATGATATCAAGTTTGCAAGCGGTGTGAGCAAGGGCGAGGAGGATAACATGGCCATCATCAAGGAGTTCATGCGCTTCAAGGTGCACATGGAGGGCTCCGTGAACGGC	ATGAGATTTCCTTCAATTTTTACTGCTGTTTTATTCGCAGCATCCTCCGCATTAGCTGCTAGCAAAAAAAAAAAAAAAGCAAGCGGTGTGAGCAAGGGCGAGGAGGATAACATGGCCATCATCAAGGAGTTCATGCGCTTCAAGGTGCACATGGAGGGCTCCGTGAACGGC
ATGAGATTTCCTTCAA-TTTTACTGCTGTTTTATTCGCAGCATCCTCCGCATTAGCTGCTAGCtgctttcgcatgcc--------------GGCAAGCGGTGTGAGCAAGGGCGAGGAGGATAACATGGCCATCATCAAGGAGTTCATGCGCTTCAAGGTGCACATGGAGGGCTCCGTGAACGGC	1	34	Insertion and Deletion	0	-1		18	MRFPSILLLFYSQHPPH*											MRFPSIFTAVLFAASSALAASKKKKKASGVSKGEEDNMAIIKEFMRFKVHMEGSVNG	ATGAGATTTCCTTCAA-TTTTACTGCTGTTTTATTCGCAGCATCCTCCGCATTAGCTGCTAGCTGCTTTCGCATGCC--------------GGCAAGCGGTGTGAGCAAGGGCGAGGAGGATAACATGGCCATCATCAAGGAGTTCATGCGCTTCAAGGTGCACATGGAGGGCTCCGTGAACGGC	ATGAGATTTCCTTCAATTTTTACTGCTGTTTTATTCGCAGCATCCTCCGCATTAGCTGCTAGCAAAAAAAAAAAAAAAGCAAGCGGTGTGAGCAAGGGCGAGGAGGATAACATGGCCATCATCAAGGAGTTCATGCGCTTCAAGGTGCACATGGAGGGCTCCGTGAACGGC
ATGAGATTTCCTTCAATTTTTACT-CTGTTTTATTCGCAGCATCCTCCGCATTAGCTGCTAGCCGAACAGGAGAGGCCGCAAGCGGTGTGAGCAAGGGCGAGGAGGATAACATGGCCATCATCAAGGAGTTCATGCGCTTCAAGGTGCACATGGAGGGCTCCGTGAACGGC	1	33	Deletion	0	-1		18	MRFPSIFTLFYSQHPPH*											MRFPSIFTAVLFAASSALAASKKKKKASGVSKGEEDNMAIIKEFMRFKVHMEGSVNG	ATGAGATTTCCTTCAATTTTTACT-CTGTTTTATTCGCAGCATCCTCCGCATTAGCTGCTAGCCGAACAGGAGAGGCCGCAAGCGGTGTGAGCAAGGGCGAGGAGGATAACATGGCCATCATCAAGGAGTTCATGCGCTTCAAGGTGCACATGGAGGGCTCCGTGAACGGC	ATGAGATTTCCTTCAATTTTTACTGCTGTTTTATTCGCAGCATCCTCCGCATTAGCTGCTAGCAAAAAAAAAAAAAAAGCAAGCGGTGTGAGCAAGGGCGAGGAGGATAACATGGCCATCATCAAGGAGTTCATGCGCTTCAAGGTGCACATGGAGGGCTCCGTGAACGGC
ATGAGATTTCCTTCAATTTTTACTGCTG-TTTATTCGCAGCATCCTCCGCATTAGCTGCTAGC------------ATAGggactagtgtggCAAGCGGTGTGAGCAAGGGCGAGGAGGATAACATGGCCATCATCAAGGAGTTCATGCGCTTCAAGGTGCACATGGAGGGCTCCGTGAACGGC	1	38	Insertion and Deletion	0	-1		18	MRFPSIFTAVYSQHPPH*											MRFPSIFTAVLFAASSALAASKKKKKASGVSKGEEDNMAIIKEFMRFKVHMEGSVNG	ATGAGATTTCCTTCAATTTTTACTGCTG-TTTATTCGCAGCATCCTCCGCATTAGCTGCTAGC------------ATAGGGACTAGTGTGGCAAGCGGTGTGAGCAAGGGCGAGGAGGATAACATGGCCATCATCAAGGAGTTCATGCGCTTCAAGGTGCACATGGAGGGCTCCGTGAACGGC	ATGAGATTTCCTTCAATTTTTACTGCTGTTTTATTCGCAGCATCCTCCGCATTAGCTGCTAGCAAAAAAAAAAAAAAAGCAAGCGGTGTGAGCAAGGGCGAGGAGGATAACATGGCCATCATCAAGGAGTTCATGCGCTTCAAGGTGCACATGGAGGGCTCCGTGAACGGC
ATGAGATTTCCTTCAATTTTTACTGCTG-TTTATTCGCAGCATCCTCCGCATTAGCTGCTAGC---------GATTAAGgtgtgttggCAAGCGGTGTGAGCAAGGGCGAGGAGGATAACATGGCCATCATCAAGGAGTTCATGCGCTTCAAGGTGCACATGGAGGGCTCCGTGAACGGC	1	30	Insertion and Deletion	0	-1		18	MRFPSIFTAVYSQHPPH*											MRFPSIFTAVLFAASSALAASKKKKKASGVSKGEEDNMAIIKEFMRFKVHMEGSVNG	ATGAGATTTCCTTCAATTTTTACTGCTG-TTTATTCGCAGCATCCTCCGCATTAGCTGCTAGC---------GATTAAGGTGTGTTGGCAAGCGGTGTGAGCAAGGGCGAGGAGGATAACATGGCCATCATCAAGGAGTTCATGCGCTTCAAGGTGCACATGGAGGGCTCCGTGAACGGC	ATGAGATTTCCTTCAATTTTTACTGCTGTTTTATTCGCAGCATCCTCCGCATTAGCTGCTAGCAAAAAAAAAAAAAAAGCAAGCGGTGTGAGCAAGGGCGAGGAGGATAACATGGCCATCATCAAGGAGTTCATGCGCTTCAAGGTGCACATGGAGGGCTCCGTGAACGGC
ATGAGATTTCCTTCAATTTTTACTGCTGTTTTATTCGCAACATCCTCCGCATAAGCTGCTAGC---------TGACATggcttgtgaGCAAGCGGTGTGAGCAAGGGCGAGGAGGATAACATGGCCAACATCAAGGAGTTCATGCGCTTCAAGGTGCACATGGAGGGATCCGTGAACGGC	1	24	Insertion and Deletion	0	0		18	MRFPSIFTAVLFATSSA*											MRFPSIFTAVLFAASSALAASKKKKKASGVSKGEEDNMAIIKEFMRFKVHMEGSVNG	ATGAGATTTCCTTCAATTTTTACTGCTGTTTTATTCGCAACATCCTCCGCATAAGCTGCTAGC---------TGACATGGCTTGTGAGCAAGCGGTGTGAGCAAGGGCGAGGAGGATAACATGGCCAACATCAAGGAGTTCATGCGCTTCAAGGTGCACATGGAGGGATCCGTGAACGGC	ATGAGATTTCCTTCAATTTTTACTGCTGTTTTATTCGCAGCATCCTCCGCATTAGCTGCTAGCAAAAAAAAAAAAAAAGCAAGCGGTGTGAGCAAGGGCGAGGAGGATAACATGGCCATCATCAAGGAGTTCATGCGCTTCAAGGTGCACATGGAGGGCTCCGTGAACGGC
ATGAGATTTCCTTCAATTTTTACTGCTGTTTTATTCGCAGCAT-CTCCGCATTAGCTGCTAGC----------ACAAATcgggatggcgC-AGCGGTGTGAGCAAGGGCGAGGAGGATAACATGGCCATCATCAAGGAGTTCATGCGCTTCAAGGTGCACATGGAGGGCTCCGTGAACGGC	1	35	Insertion and Deletion	0	-2		18	MRFPSIFTAVLFAASPH*											MRFPSIFTAVLFAASSALAASKKKKKASGVSKGEEDNMAIIKEFMRFKVHMEGSVNG	ATGAGATTTCCTTCAATTTTTACTGCTGTTTTATTCGCAGCAT-CTCCGCATTAGCTGCTAGC----------ACAAATCGGGATGGCGC-AGCGGTGTGAGCAAGGGCGAGGAGGATAACATGGCCATCATCAAGGAGTTCATGCGCTTCAAGGTGCACATGGAGGGCTCCGTGAACGGC	ATGAGATTTCCTTCAATTTTTACTGCTGTTTTATTCGCAGCATCCTCCGCATTAGCTGCTAGCAAAAAAAAAAAAAAAGCAAGCGGTGTGAGCAAGGGCGAGGAGGATAACATGGCCATCATCAAGGAGTTCATGCGCTTCAAGGTGCACATGGAGGGCTCCGTGAACGGC
ATGAGATTTCCTTCAATTTTTACTGCTGTTTTATTCGCAGCAT-CTCCGCATTAGCTGCTAGC-------ATCAAATATgtggctgCAAGCGGTGTGAGCAAGGGCGAGGAGGATAACATGGCCATCATCAAGGAGTTCATGCGCTTCAAGGTGCACATGGAGGGCTCCGTGAACGGC	1	32	Insertion and Deletion	0	-1		18	MRFPSIFTAVLFAASPH*											MRFPSIFTAVLFAASSALAASKKKKKASGVSKGEEDNMAIIKEFMRFKVHMEGSVNG	ATGAGATTTCCTTCAATTTTTACTGCTGTTTTATTCGCAGCAT-CTCCGCATTAGCTGCTAGC-------ATCAAATATGTGGCTGCAAGCGGTGTGAGCAAGGGCGAGGAGGATAACATGGCCATCATCAAGGAGTTCATGCGCTTCAAGGTGCACATGGAGGGCTCCGTGAACGGC	ATGAGATTTCCTTCAATTTTTACTGCTGTTTTATTCGCAGCATCCTCCGCATTAGCTGCTAGCAAAAAAAAAAAAAAAGCAAGCGGTGTGAGCAAGGGCGAGGAGGATAACATGGCCATCATCAAGGAGTTCATGCGCTTCAAGGTGCACATGGAGGGCTCCGTGAACGGC
ATGAGATTTCCTTCAATTTTTACTGCTGTTTTATTCGCAGCATCCT-CGCATTAGCTGCTAGCAGGTAATTAGTACCCGCAAGCGGTGTGAGCAAGGGCGAGGAGGATAACATGGCCATCATCAAGGAGTTCATGCGCTTCAAGGTGCACATGGAGGGCTCCGTGAACGGC	1	30	Deletion	0	-1		18	MRFPSIFTAVLFAASSH*											MRFPSIFTAVLFAASSALAASKKKKKASGVSKGEEDNMAIIKEFMRFKVHMEGSVNG	ATGAGATTTCCTTCAATTTTTACTGCTGTTTTATTCGCAGCATCCT-CGCATTAGCTGCTAGCAGGTAATTAGTACCCGCAAGCGGTGTGAGCAAGGGCGAGGAGGATAACATGGCCATCATCAAGGAGTTCATGCGCTTCAAGGTGCACATGGAGGGCTCCGTGAACGGC	ATGAGATTTCCTTCAATTTTTACTGCTGTTTTATTCGCAGCATCCTCCGCATTAGCTGCTAGCAAAAAAAAAAAAAAAGCAAGCGGTGTGAGCAAGGGCGAGGAGGATAACATGGCCATCATCAAGGAGTTCATGCGCTTCAAGGTGCACATGGAGGGCTCCGTGAACGGC
ATGAGATTTCCTTCAATTTTTACTGCTGTTTTATTCGCAGCATCCTCCGC-TTAGCTGCTAGCGgcctatgccccga-------------TGCAAGCGGTGTGAGCAAGGGCGAGGAGGATAACATGGCCATCATCAAGGAGTTCATGCGCTTCAAGGTGCACATGGAGGGCTCCGTGAACGGC	1	29	Insertion and Deletion	0	-1		18	MRFPSIFTAVLFAASSA*											MRFPSIFTAVLFAASSALAASKKKKKASGVSKGEEDNMAIIKEFMRFKVHMEGSVNG	ATGAGATTTCCTTCAATTTTTACTGCTGTTTTATTCGCAGCATCCTCCGC-TTAGCTGCTAGCGGCCTATGCCCCGA-------------TGCAAGCGGTGTGAGCAAGGGCGAGGAGGATAACATGGCCATCATCAAGGAGTTCATGCGCTTCAAGGTGCACATGGAGGGCTCCGTGAACGGC	ATGAGATTTCCTTCAATTTTTACTGCTGTTTTATTCGCAGCATCCTCCGCATTAGCTGCTAGCAAAAAAAAAAAAAAAGCAAGCGGTGTGAGCAAGGGCGAGGAGGATAACATGGCCATCATCAAGGAGTTCATGCGCTTCAAGGTGCACATGGAGGGCTCCGTGAACGGC
ATGAGATTTCCTTCAATTTTTACTGCTGTTTTATTCGCAGCATCCTCCGCA-TAGCTGCTAGC---------------GGgtacagtgttgttgcAAGCGGTGTGAGCAAGGGCGAGGAGGATAACATGGCCATCATCAAGGAGTTCATGCGCTTCAAGGTGCACATGGAGGGCTCCGTGAACGGC	1	36	Insertion and Deletion	0	-1		18	MRFPSIFTAVLFAASSA*											MRFPSIFTAVLFAASSALAASKKKKKASGVSKGEEDNMAIIKEFMRFKVHMEGSVNG	ATGAGATTTCCTTCAATTTTTACTGCTGTTTTATTCGCAGCATCCTCCGCA-TAGCTGCTAGC---------------GGGTACAGTGTTGTTGCAAGCGGTGTGAGCAAGGGCGAGGAGGATAACATGGCCATCATCAAGGAGTTCATGCGCTTCAAGGTGCACATGGAGGGCTCCGTGAACGGC	ATGAGATTTCCTTCAATTTTTACTGCTGTTTTATTCGCAGCATCCTCCGCATTAGCTGCTAGCAAAAAAAAAAAAAAAGCAAGCGGTGTGAGCAAGGGCGAGGAGGATAACATGGCCATCATCAAGGAGTTCATGCGCTTCAAGGTGCACATGGAGGGCTCCGTGAACGGC
ATGAGATTTCCTTCAATTTTTACTGCTGTTTTATTCGCAGCATCCTCCGCA-TAGCTGCTAGC---------------GTgttgggggctcgggcAAGCGGTGTGAGCAAGGGCGAGGAGGATAACATGGCCATCATCAAGGAGTTCATGCGCTTCAAGGTGCACATGGAGGGCTCCGTGAACGGC	1	32	Insertion and Deletion	0	-1		18	MRFPSIFTAVLFAASSA*											MRFPSIFTAVLFAASSALAASKKKKKASGVSKGEEDNMAIIKEFMRFKVHMEGSVNG	ATGAGATTTCCTTCAATTTTTACTGCTGTTTTATTCGCAGCATCCTCCGCA-TAGCTGCTAGC---------------GTGTTGGGGGCTCGGGCAAGCGGTGTGAGCAAGGGCGAGGAGGATAACATGGCCATCATCAAGGAGTTCATGCGCTTCAAGGTGCACATGGAGGGCTCCGTGAACGGC	ATGAGATTTCCTTCAATTTTTACTGCTGTTTTATTCGCAGCATCCTCCGCATTAGCTGCTAGCAAAAAAAAAAAAAAAGCAAGCGGTGTGAGCAAGGGCGAGGAGGATAACATGGCCATCATCAAGGAGTTCATGCGCTTCAAGGTGCACATGGAGGGCTCCGTGAACGGC
ATGAGATTTCCTTCAATTTTTACTGCTGTTTTATTCGCAGCATCCTCCGCA-TAGCTGCTAGC--------------ATggttgcgtgtggCAAGCGGTGTGAGCAAGGGCGAGGAGGATAACATGGCCATCATCAAGGAGTTCATGCGCTTCAAGGTGCACATGGAGGGCTCCGTGAACGGC	1	26	Insertion and Deletion	0	-3		18	MRFPSIFTAVLFAASSA*											MRFPSIFTAVLFAASSALAASKKKKKASGVSKGEEDNMAIIKEFMRFKVHMEGSVNG	ATGAGATTTCCTTCAATTTTTACTGCTGTTTTATTCGCAGCATCCTCCGCA-TAGCTGCTAGC--------------ATGGTTGCGTGTGGCAAGCGGTGTGAGCAAGGGCGAGGAGGATAACATGGCCATCATCAAGGAGTTCATGCGCTTCAAGGTGCACATGGAGGGCTCCGTGAACGGC	ATGAGATTTCCTTCAATTTTTACTGCTGTTTTATTCGCAGCATCCTCCGCATTAGCTGCTAGCAAAAAAAAAAAAAAAGCAAGCGGTGTGAGCAAGGGCGAGGAGGATAACATGGCCATCATCAAGGAGTTCATGCGCTTCAAGGTGCACATGGAGGGCTCCGTGAACGGC
ATGAGATTTCCTTCAATTTTTACTGCTGTTTTATTCGCAGCATCCTCCGCA-TAGCTGCTAGC------------ATcgttcgccagtaAGCAAGCGGTGTGAGCAAGGGCGAGGAGGATAACATGGCCATCATCAAGGAGTTCATGCGCTTCAAGGTGCACATGGAGGGCTCCGTGAACGGC	1	34	Insertion and Deletion	0	-1		18	MRFPSIFTAVLFAASSA*											MRFPSIFTAVLFAASSALAASKKKKKASGVSKGEEDNMAIIKEFMRFKVHMEGSVNG	ATGAGATTTCCTTCAATTTTTACTGCTGTTTTATTCGCAGCATCCTCCGCA-TAGCTGCTAGC------------ATCGTTCGCCAGTAAGCAAGCGGTGTGAGCAAGGGCGAGGAGGATAACATGGCCATCATCAAGGAGTTCATGCGCTTCAAGGTGCACATGGAGGGCTCCGTGAACGGC	ATGAGATTTCCTTCAATTTTTACTGCTGTTTTATTCGCAGCATCCTCCGCATTAGCTGCTAGCAAAAAAAAAAAAAAAGCAAGCGGTGTGAGCAAGGGCGAGGAGGATAACATGGCCATCATCAAGGAGTTCATGCGCTTCAAGGTGCACATGGAGGGCTCCGTGAACGGC
ATGAGATTTCCTTCAATTTTTACTGCTGTTTTATTCGCAGCATCCTCCGCA-TAGCTGCTAGC---------CACATcatgttgtaCGCAAGCGGTGTGAGCAAGGGCGAGGAGGATAACATGGCCATCATCAAGGAGTTCATGCGCTTCAAGGTGCACATGGAGGGCTCCGTGAACGGC	1	29	Insertion and Deletion	0	-1		18	MRFPSIFTAVLFAASSA*											MRFPSIFTAVLFAASSALAASKKKKKASGVSKGEEDNMAIIKEFMRFKVHMEGSVNG	ATGAGATTTCCTTCAATTTTTACTGCTGTTTTATTCGCAGCATCCTCCGCA-TAGCTGCTAGC---------CACATCATGTTGTACGCAAGCGGTGTGAGCAAGGGCGAGGAGGATAACATGGCCATCATCAAGGAGTTCATGCGCTTCAAGGTGCACATGGAGGGCTCCGTGAACGGC	ATGAGATTTCCTTCAATTTTTACTGCTGTTTTATTCGCAGCATCCTCCGCATTAGCTGCTAGCAAAAAAAAAAAAAAAGCAAGCGGTGTGAGCAAGGGCGAGGAGGATAACATGGCCATCATCAAGGAGTTCATGCGCTTCAAGGTGCACATGGAGGGCTCCGTGAACGGC
ATGAGATTTCCTTCAATTTTTACTGCTGTTTTATTCGCAGCATCCTCCGCA-TAGCTGCTAGC-------AAAACTAACtggcgcgCAAGCGGTGTGAGCAAGGGCGAGGAGGATAACATGGCCATCATCAAGGAGTTCATGCGCTTCAAGGTGCACATGGAGGGCTCCGTGAACGGC	1	34	Insertion and Deletion	0	-1		18	MRFPSIFTAVLFAASSA*											MRFPSIFTAVLFAASSALAASKKKKKASGVSKGEEDNMAIIKEFMRFKVHMEGSVNG	ATGAGATTTCCTTCAATTTTTACTGCTGTTTTATTCGCAGCATCCTCCGCA-TAGCTGCTAGC-------AAAACTAACTGGCGCGCAAGCGGTGTGAGCAAGGGCGAGGAGGATAACATGGCCATCATCAAGGAGTTCATGCGCTTCAAGGTGCACATGGAGGGCTCCGTGAACGGC	ATGAGATTTCCTTCAATTTTTACTGCTGTTTTATTCGCAGCATCCTCCGCATTAGCTGCTAGCAAAAAAAAAAAAAAAGCAAGCGGTGTGAGCAAGGGCGAGGAGGATAACATGGCCATCATCAAGGAGTTCATGCGCTTCAAGGTGCACATGGAGGGCTCCGTGAACGGC
ATGAGATTTCCTTCAATTTTTACTGCTGTTTTATTCGCAGCATCCTCCGCA-TAGCTGCTAGC-------ACAAGAAACgctgcggCAAGCGGTGTGAGCAAGGGCGAGGAGGATAACATGGCCATCATCAAGGAGTTCATGCGCTTCAAGGTGCACATGGAGGGCTCCGTGAACGGC	1	30	Insertion and Deletion	0	-1		18	MRFPSIFTAVLFAASSA*											MRFPSIFTAVLFAASSALAASKKKKKASGVSKGEEDNMAIIKEFMRFKVHMEGSVNG	ATGAGATTTCCTTCAATTTTTACTGCTGTTTTATTCGCAGCATCCTCCGCA-TAGCTGCTAGC-------ACAAGAAACGCTGCGGCAAGCGGTGTGAGCAAGGGCGAGGAGGATAACATGGCCATCATCAAGGAGTTCATGCGCTTCAAGGTGCACATGGAGGGCTCCGTGAACGGC	ATGAGATTTCCTTCAATTTTTACTGCTGTTTTATTCGCAGCATCCTCCGCATTAGCTGCTAGCAAAAAAAAAAAAAAAGCAAGCGGTGTGAGCAAGGGCGAGGAGGATAACATGGCCATCATCAAGGAGTTCATGCGCTTCAAGGTGCACATGGAGGGCTCCGTGAACGGC
ATGAGATTTCCTTCAATTTTTACTGCTGTTTTATTCGCAGCATCCTCCGCA-TAGCTGCTAGCCAGTAAGATAATTTAGCAAGCGGTGTGAGCAAGGGCGAGGAGGATAACATGGCCATCATCAAGGAGTTCATGCGCTTCAAGGTGCACATGGAGGGCTCCGTGAACGGC	1	35	Deletion	0	-1		18	MRFPSIFTAVLFAASSA*											MRFPSIFTAVLFAASSALAASKKKKKASGVSKGEEDNMAIIKEFMRFKVHMEGSVNG	ATGAGATTTCCTTCAATTTTTACTGCTGTTTTATTCGCAGCATCCTCCGCA-TAGCTGCTAGCCAGTAAGATAATTTAGCAAGCGGTGTGAGCAAGGGCGAGGAGGATAACATGGCCATCATCAAGGAGTTCATGCGCTTCAAGGTGCACATGGAGGGCTCCGTGAACGGC	ATGAGATTTCCTTCAATTTTTACTGCTGTTTTATTCGCAGCATCCTCCGCATTAGCTGCTAGCAAAAAAAAAAAAAAAGCAAGCGGTGTGAGCAAGGGCGAGGAGGATAACATGGCCATCATCAAGGAGTTCATGCGCTTCAAGGTGCACATGGAGGGCTCCGTGAACGGC
ATGAGATTTCCTTCAATTTTTACTGCTGTTTTATTCGCAGCATCCTCCGCA-TAGCTGCTAGCCgtgctttta---------AAGTTGCAAGCGGTGTGAGCAAGGGCGAGGAGGATAACATGGCCATCATCAAGGAGTTCATGCGCTTCAAGGTGCACATGGAGGGCTCCGTGAACGGC	1	24	Insertion and Deletion	0	-1		18	MRFPSIFTAVLFAASSA*											MRFPSIFTAVLFAASSALAASKKKKKASGVSKGEEDNMAIIKEFMRFKVHMEGSVNG	ATGAGATTTCCTTCAATTTTTACTGCTGTTTTATTCGCAGCATCCTCCGCA-TAGCTGCTAGCCGTGCTTTTA---------AAGTTGCAAGCGGTGTGAGCAAGGGCGAGGAGGATAACATGGCCATCATCAAGGAGTTCATGCGCTTCAAGGTGCACATGGAGGGCTCCGTGAACGGC	ATGAGATTTCCTTCAATTTTTACTGCTGTTTTATTCGCAGCATCCTCCGCATTAGCTGCTAGCAAAAAAAAAAAAAAAGCAAGCGGTGTGAGCAAGGGCGAGGAGGATAACATGGCCATCATCAAGGAGTTCATGCGCTTCAAGGTGCACATGGAGGGCTCCGTGAACGGC
ATGAGATTTCCTTCAATTTTTACTGCTGTTTTATTCGCAGCATCCTCCGCA-TAGCTGCTAGcggttcgC-------AAATGTAGGCAAGCGGTGTGAGCAAGGGCGAGGAGGATAACATGGCCATCATCAAGGAGTTCATGCGCTTCAAGGTGCACATGGAGGGCTCCGTGAACGGC	1	27	Insertion and Deletion	0	-1		18	MRFPSIFTAVLFAASSA*											MRFPSIFTAVLFAASSALAASKKKKKASGVSKGEEDNMAIIKEFMRFKVHMEGSVNG	ATGAGATTTCCTTCAATTTTTACTGCTGTTTTATTCGCAGCATCCTCCGCA-TAGCTGCTAGCGGTTCGC-------AAATGTAGGCAAGCGGTGTGAGCAAGGGCGAGGAGGATAACATGGCCATCATCAAGGAGTTCATGCGCTTCAAGGTGCACATGGAGGGCTCCGTGAACGGC	ATGAGATTTCCTTCAATTTTTACTGCTGTTTTATTCGCAGCATCCTCCGCATTAGCTGCTAGCAAAAAAAAAAAAAAAGCAAGCGGTGTGAGCAAGGGCGAGGAGGATAACATGGCCATCATCAAGGAGTTCATGCGCTTCAAGGTGCACATGGAGGGCTCCGTGAACGGC
ATGAGATTTCCTTCAATTTTTACTGCTGTTTTATTCGCAGCATCCTCCGCA-TAGCTGCTAGCtcgccagcc---------ATACATGCAAGCGGTGTGAGCAAGGGCGAGGAGGATAACATGGCCATCATCAAGGAGTTCATGCGCTTCAAGGTGCACATGGAGGGCTCCGTGAACGGC	1	33	Insertion and Deletion	0	-1		18	MRFPSIFTAVLFAASSA*											MRFPSIFTAVLFAASSALAASKKKKKASGVSKGEEDNMAIIKEFMRFKVHMEGSVNG	ATGAGATTTCCTTCAATTTTTACTGCTGTTTTATTCGCAGCATCCTCCGCA-TAGCTGCTAGCTCGCCAGCC---------ATACATGCAAGCGGTGTGAGCAAGGGCGAGGAGGATAACATGGCCATCATCAAGGAGTTCATGCGCTTCAAGGTGCACATGGAGGGCTCCGTGAACGGC	ATGAGATTTCCTTCAATTTTTACTGCTGTTTTATTCGCAGCATCCTCCGCATTAGCTGCTAGCAAAAAAAAAAAAAAAGCAAGCGGTGTGAGCAAGGGCGAGGAGGATAACATGGCCATCATCAAGGAGTTCATGCGCTTCAAGGTGCACATGGAGGGCTCCGTGAACGGC
ATGAGATTTCCTTCAATTTTTACTGCTGTTTTATTCGCAGCATCCTCCGCA-TAGCTGCTAGCTGGCTAAGGAGGAGGGCAAGCGGTGTGAGCAAGGGCGAGGAGGATAACATGGCCATCATCAAGGAGTTCATGCGCTTCAAGGTGCACATGGAGGGCTCCGTGAACGGC	1	33	Deletion	0	-1		18	MRFPSIFTAVLFAASSA*											MRFPSIFTAVLFAASSALAASKKKKKASGVSKGEEDNMAIIKEFMRFKVHMEGSVNG	ATGAGATTTCCTTCAATTTTTACTGCTGTTTTATTCGCAGCATCCTCCGCA-TAGCTGCTAGCTGGCTAAGGAGGAGGGCAAGCGGTGTGAGCAAGGGCGAGGAGGATAACATGGCCATCATCAAGGAGTTCATGCGCTTCAAGGTGCACATGGAGGGCTCCGTGAACGGC	ATGAGATTTCCTTCAATTTTTACTGCTGTTTTATTCGCAGCATCCTCCGCATTAGCTGCTAGCAAAAAAAAAAAAAAAGCAAGCGGTGTGAGCAAGGGCGAGGAGGATAACATGGCCATCATCAAGGAGTTCATGCGCTTCAAGGTGCACATGGAGGGCTCCGTGAACGGC
ATGAGATTTCCTTCAATTTTTACTGCTGTTTTATTCGCAGCATCCTCCGCA-TAGCTGCTAGCTtcgtgagta---------AACAGGCAAGCGGTGTGAGCAAGGGCGAGGAGGATAACATGGCCATCATCAAGGAGTTCATGCGCTTCAAGGTGCACATGGAGGGCTCCGTGAACGGC	1	36	Insertion and Deletion	0	-1		18	MRFPSIFTAVLFAASSA*											MRFPSIFTAVLFAASSALAASKKKKKASGVSKGEEDNMAIIKEFMRFKVHMEGSVNG	ATGAGATTTCCTTCAATTTTTACTGCTGTTTTATTCGCAGCATCCTCCGCA-TAGCTGCTAGCTTCGTGAGTA---------AACAGGCAAGCGGTGTGAGCAAGGGCGAGGAGGATAACATGGCCATCATCAAGGAGTTCATGCGCTTCAAGGTGCACATGGAGGGCTCCGTGAACGGC	ATGAGATTTCCTTCAATTTTTACTGCTGTTTTATTCGCAGCATCCTCCGCATTAGCTGCTAGCAAAAAAAAAAAAAAAGCAAGCGGTGTGAGCAAGGGCGAGGAGGATAACATGGCCATCATCAAGGAGTTCATGCGCTTCAAGGTGCACATGGAGGGCTCCGTGAACGGC
ATGAGATTTCCTTCAATTTTTACTGCTGTTTTATTCGCAGCATCCTCCGCATAAGCTGCTAGC----------CAACccgttccgcaCGCAAGCGGTGTGAGCAAGGGCGAGGAGGATAACATGGCCATCATCAAGGAGTTCATGCGCTTCAAGGTGCACATGGAGGGCTCCGTGAACGGC	1	28	Insertion and Deletion	0	0		18	MRFPSIFTAVLFAASSA*											MRFPSIFTAVLFAASSALAASKKKKKASGVSKGEEDNMAIIKEFMRFKVHMEGSVNG	ATGAGATTTCCTTCAATTTTTACTGCTGTTTTATTCGCAGCATCCTCCGCATAAGCTGCTAGC----------CAACCCGTTCCGCACGCAAGCGGTGTGAGCAAGGGCGAGGAGGATAACATGGCCATCATCAAGGAGTTCATGCGCTTCAAGGTGCACATGGAGGGCTCCGTGAACGGC	ATGAGATTTCCTTCAATTTTTACTGCTGTTTTATTCGCAGCATCCTCCGCATTAGCTGCTAGCAAAAAAAAAAAAAAAGCAAGCGGTGTGAGCAAGGGCGAGGAGGATAACATGGCCATCATCAAGGAGTTCATGCGCTTCAAGGTGCACATGGAGGGCTCCGTGAACGGC
ATGAGATTTCCTTCAATTTTTACTGCTGTTTTATTCGCAGCATCCTCCGCATAAGCTGCTAGC---------ATAAAAGgttcgggtgCAAGCGGTGTGAGCAAGGGCGAGGAGGATAACATGGCCATCATCAAGGAGTTCATGCGCTTCAAGGTGCACATGGAGGGCTCCGTGAACGGC	1	25	Insertion and Deletion	0	0		18	MRFPSIFTAVLFAASSA*											MRFPSIFTAVLFAASSALAASKKKKKASGVSKGEEDNMAIIKEFMRFKVHMEGSVNG	ATGAGATTTCCTTCAATTTTTACTGCTGTTTTATTCGCAGCATCCTCCGCATAAGCTGCTAGC---------ATAAAAGGTTCGGGTGCAAGCGGTGTGAGCAAGGGCGAGGAGGATAACATGGCCATCATCAAGGAGTTCATGCGCTTCAAGGTGCACATGGAGGGCTCCGTGAACGGC	ATGAGATTTCCTTCAATTTTTACTGCTGTTTTATTCGCAGCATCCTCCGCATTAGCTGCTAGCAAAAAAAAAAAAAAAGCAAGCGGTGTGAGCAAGGGCGAGGAGGATAACATGGCCATCATCAAGGAGTTCATGCGCTTCAAGGTGCACATGGAGGGCTCCGTGAACGGC
ATGAGATTTCCTTCAATTTTTACTGCTGTTTTATTCGCAGCATCCTCCGCATAAGCTGCTAGCCAAAGCTGACAGCGCGCAAGCGGTGTGAGCAAGGGCGAGGAGGATAACATGGCCATCATCAAGGAGTTCATGCGCTTCAAGGTGCACATGGAGGGCTCCGTGAACGGC	1	22	11 Base Changes	0	0		18	MRFPSIFTAVLFAASSA*											MRFPSIFTAVLFAASSALAASKKKKKASGVSKGEEDNMAIIKEFMRFKVHMEGSVNG	ATGAGATTTCCTTCAATTTTTACTGCTGTTTTATTCGCAGCATCCTCCGCATAAGCTGCTAGCCAAAGCTGACAGCGCGCAAGCGGTGTGAGCAAGGGCGAGGAGGATAACATGGCCATCATCAAGGAGTTCATGCGCTTCAAGGTGCACATGGAGGGCTCCGTGAACGGC	ATGAGATTTCCTTCAATTTTTACTGCTGTTTTATTCGCAGCATCCTCCGCATTAGCTGCTAGCAAAAAAAAAAAAAAAGCAAGCGGTGTGAGCAAGGGCGAGGAGGATAACATGGCCATCATCAAGGAGTTCATGCGCTTCAAGGTGCACATGGAGGGCTCCGTGAACGGC
ATGAGATTTCCTTCAATTTTTACTGCTGTTTTATTCGCAGCATCCTCCGCATGAGCTGCTAGC------------ACATctgcagatttgCAAGCGGTGTGAGCAAGGGCGAGGAGGATAACATGGCCATCATCAAGGAGTTCATGCGCATCAAGGTGCACATGGAGGGCTCCGTGAACGGC	1	29	Insertion and Deletion	0	-1		18	MRFPSIFTAVLFAASSA*											MRFPSIFTAVLFAASSALAASKKKKKASGVSKGEEDNMAIIKEFMRFKVHMEGSVNG	ATGAGATTTCCTTCAATTTTTACTGCTGTTTTATTCGCAGCATCCTCCGCATGAGCTGCTAGC------------ACATCTGCAGATTTGCAAGCGGTGTGAGCAAGGGCGAGGAGGATAACATGGCCATCATCAAGGAGTTCATGCGCATCAAGGTGCACATGGAGGGCTCCGTGAACGGC	ATGAGATTTCCTTCAATTTTTACTGCTGTTTTATTCGCAGCATCCTCCGCATTAGCTGCTAGCAAAAAAAAAAAAAAAGCAAGCGGTGTGAGCAAGGGCGAGGAGGATAACATGGCCATCATCAAGGAGTTCATGCGCTTCAAGGTGCACATGGAGGGCTCCGTGAACGGC
ATGAGATTTCCTTCAATTTTTACTGCTGTTTTATTCGCAGCATCCTCCGCATGAGCTGCTAGC-----------AACccctgaccctaAGCAAGCGGTGTGAGCAAGGGCGAGGAGGATAACATGGCCATCATCAAGGAGTTCATGCGCTTCAAGGTGCACATGGAGGGCTCCGTGAACGGC	1	29	Insertion and Deletion	0	0		18	MRFPSIFTAVLFAASSA*											MRFPSIFTAVLFAASSALAASKKKKKASGVSKGEEDNMAIIKEFMRFKVHMEGSVNG	ATGAGATTTCCTTCAATTTTTACTGCTGTTTTATTCGCAGCATCCTCCGCATGAGCTGCTAGC-----------AACCCCTGACCCTAAGCAAGCGGTGTGAGCAAGGGCGAGGAGGATAACATGGCCATCATCAAGGAGTTCATGCGCTTCAAGGTGCACATGGAGGGCTCCGTGAACGGC	ATGAGATTTCCTTCAATTTTTACTGCTGTTTTATTCGCAGCATCCTCCGCATTAGCTGCTAGCAAAAAAAAAAAAAAAGCAAGCGGTGTGAGCAAGGGCGAGGAGGATAACATGGCCATCATCAAGGAGTTCATGCGCTTCAAGGTGCACATGGAGGGCTCCGTGAACGGC
ATGAGATTTCCTTCAATTTTTACTGCTGTTTTATTCGCAGCATCCTCCGCATGAGCTGCTAGC-----------CAGgttaACttctctgCAAGCGGTGTGAGCAAGGGCGAGGAGGATAACATGGCCATCATCAAGGAGTTCATGCGCTTCAAGGTGCACATGGAGGGCTCCGTGAACGGC	1	25	Insertion and Deletion	0	0		18	MRFPSIFTAVLFAASSA*											MRFPSIFTAVLFAASSALAASKKKKKASGVSKGEEDNMAIIKEFMRFKVHMEGSVNG	ATGAGATTTCCTTCAATTTTTACTGCTGTTTTATTCGCAGCATCCTCCGCATGAGCTGCTAGC-----------CAGGTTAACTTCTCTGCAAGCGGTGTGAGCAAGGGCGAGGAGGATAACATGGCCATCATCAAGGAGTTCATGCGCTTCAAGGTGCACATGGAGGGCTCCGTGAACGGC	ATGAGATTTCCTTCAATTTTTACTGCTGTTTTATTCGCAGCATCCTCCGCATTAGCTGCTAGCAAAAAAAAAAAAAAAGCAAGCGGTGTGAGCAAGGGCGAGGAGGATAACATGGCCATCATCAAGGAGTTCATGCGCTTCAAGGTGCACATGGAGGGCTCCGTGAACGGC
ATGAGATTTCCTTCAATTTTTACTGCTGTTTTATTCGCAGCATCCTCCGCATGAGCTGCTAGCAATATGATTAGCGGAGCAAGCGGTGTGAGCAAGGGCGAGGAGGATAACATGGCCATCATCAAGGAGTTCATGCGCTTCAAGGTGCACATGGAGGGCTCCGTGAACGGC	1	21	10 Base Changes	0	0		18	MRFPSIFTAVLFAASSA*											MRFPSIFTAVLFAASSALAASKKKKKASGVSKGEEDNMAIIKEFMRFKVHMEGSVNG	ATGAGATTTCCTTCAATTTTTACTGCTGTTTTATTCGCAGCATCCTCCGCATGAGCTGCTAGCAATATGATTAGCGGAGCAAGCGGTGTGAGCAAGGGCGAGGAGGATAACATGGCCATCATCAAGGAGTTCATGCGCTTCAAGGTGCACATGGAGGGCTCCGTGAACGGC	ATGAGATTTCCTTCAATTTTTACTGCTGTTTTATTCGCAGCATCCTCCGCATTAGCTGCTAGCAAAAAAAAAAAAAAAGCAAGCGGTGTGAGCAAGGGCGAGGAGGATAACATGGCCATCATCAAGGAGTTCATGCGCTTCAAGGTGCACATGGAGGGCTCCGTGAACGGC
ATGAGATTTCCTTCAATTTTTACTGCTGTTTTATTCGCAGCATCCTCCGCATGAGCTGCTAGCACCCAGGACGCACAAGCAAGCGGTGTGAGCAAGGGCGAGGAGGATAACATGGCCATCATCAAGGAGTTCATGCGCTTCAAGGTGCACATGGAGGGCTCCGTGAACGGC	1	21	10 Base Changes	0	0		18	MRFPSIFTAVLFAASSA*											MRFPSIFTAVLFAASSALAASKKKKKASGVSKGEEDNMAIIKEFMRFKVHMEGSVNG	ATGAGATTTCCTTCAATTTTTACTGCTGTTTTATTCGCAGCATCCTCCGCATGAGCTGCTAGCACCCAGGACGCACAAGCAAGCGGTGTGAGCAAGGGCGAGGAGGATAACATGGCCATCATCAAGGAGTTCATGCGCTTCAAGGTGCACATGGAGGGCTCCGTGAACGGC	ATGAGATTTCCTTCAATTTTTACTGCTGTTTTATTCGCAGCATCCTCCGCATTAGCTGCTAGCAAAAAAAAAAAAAAAGCAAGCGGTGTGAGCAAGGGCGAGGAGGATAACATGGCCATCATCAAGGAGTTCATGCGCTTCAAGGTGCACATGGAGGGCTCCGTGAACGGC
ATGAGATTTCCTTCAATTTTTACTGCTGTTTTATTCGCAGCATCCTCCGCATGAGCTGCTAGCCcttcga----------CAAACcgggCAAGCGGGGTGAGCAAGGGCGAGGAGGATAACATGGCCATCATCAAGGAGTTCATGCGCTTCAAGGTGCACATGGAGGGCTCCGTGAACGGC	1	32	Insertion and Deletion	0	0		18	MRFPSIFTAVLFAASSA*											MRFPSIFTAVLFAASSALAASKKKKKASGVSKGEEDNMAIIKEFMRFKVHMEGSVNG	ATGAGATTTCCTTCAATTTTTACTGCTGTTTTATTCGCAGCATCCTCCGCATGAGCTGCTAGCCCTTCGA----------CAAACCGGGCAAGCGGGGTGAGCAAGGGCGAGGAGGATAACATGGCCATCATCAAGGAGTTCATGCGCTTCAAGGTGCACATGGAGGGCTCCGTGAACGGC	ATGAGATTTCCTTCAATTTTTACTGCTGTTTTATTCGCAGCATCCTCCGCATTAGCTGCTAGCAAAAAAAAAAAAAAAGCAAGCGGTGTGAGCAAGGGCGAGGAGGATAACATGGCCATCATCAAGGAGTTCATGCGCTTCAAGGTGCACATGGAGGGCTCCGTGAACGGC
ATGAGATTTCCTTCAATTTTTACTGCTGTTTTATTCGCAGCATCCTCCGCATGAGCTGCTAGCTctcgggga--------GAATCTGCAAGCGGTGTGAGCAAGGGCGAGGAGGATAACATGGCCATCATCAAGGAGTTCATGCGCTTCAAGGTGCACATGGAGGGCTCCGTGAACGGC	1	21	Insertion and Deletion	0	0		18	MRFPSIFTAVLFAASSA*											MRFPSIFTAVLFAASSALAASKKKKKASGVSKGEEDNMAIIKEFMRFKVHMEGSVNG	ATGAGATTTCCTTCAATTTTTACTGCTGTTTTATTCGCAGCATCCTCCGCATGAGCTGCTAGCTCTCGGGGA--------GAATCTGCAAGCGGTGTGAGCAAGGGCGAGGAGGATAACATGGCCATCATCAAGGAGTTCATGCGCTTCAAGGTGCACATGGAGGGCTCCGTGAACGGC	ATGAGATTTCCTTCAATTTTTACTGCTGTTTTATTCGCAGCATCCTCCGCATTAGCTGCTAGCAAAAAAAAAAAAAAAGCAAGCGGTGTGAGCAAGGGCGAGGAGGATAACATGGCCATCATCAAGGAGTTCATGCGCTTCAAGGTGCACATGGAGGGCTCCGTGAACGGC
ATGAGATTTCCTTCAATTTTTACTGCTGTTTTATTCGCAGCATCCTCCGCTTAAGCTGCcTAGCCccgtgcga--------CATGAGGCCAGCGGTGTGAGCAAGGGCGAGGAGGATAACATGGCCATCATCAAGGAGTTCATGCGCTTCAAGGTGCACATGGAGGGCTCCGTGAACGGC	1	22	Insertion and Deletion	0	1		18	MRFPSIFTAVLFAASSA*											MRFPSIFTAVLFAASSALAASKKKKKASGVSKGEEDNMAIIKEFMRFKVHMEGSVNG	ATGAGATTTCCTTCAATTTTTACTGCTGTTTTATTCGCAGCATCCTCCGCTTAAGCTGCCTAGCCCCGTGCGA--------CATGAGGCCAGCGGTGTGAGCAAGGGCGAGGAGGATAACATGGCCATCATCAAGGAGTTCATGCGCTTCAAGGTGCACATGGAGGGCTCCGTGAACGGC	ATGAGATTTCCTTCAATTTTTACTGCTGTTTTATTCGCAGCATCCTCCGCATTAGCTGCTAGCAAAAAAAAAAAAAAAGCAAGCGGTGTGAGCAAGGGCGAGGAGGATAACATGGCCATCATCAAGGAGTTCATGCGCTTCAAGGTGCACATGGAGGGCTCCGTGAACGGC
ATGAGATTTCCTTCAATTTTTACTGCTGTTTTATTCGCAGCATCCTCCGCTTAAGCTGCTAGCGATGAGAAGAATAAAGCAAGCGGTGTGAGCAAGGGCGAGGAGGATAACATGGCCATCATCAAGGAGTTCATGCGCTTCAAGGTGCACATGGAGGGCTCCGTGAACGGC	1	35	8 Base Changes	0	0		18	MRFPSIFTAVLFAASSA*											MRFPSIFTAVLFAASSALAASKKKKKASGVSKGEEDNMAIIKEFMRFKVHMEGSVNG	ATGAGATTTCCTTCAATTTTTACTGCTGTTTTATTCGCAGCATCCTCCGCTTAAGCTGCTAGCGATGAGAAGAATAAAGCAAGCGGTGTGAGCAAGGGCGAGGAGGATAACATGGCCATCATCAAGGAGTTCATGCGCTTCAAGGTGCACATGGAGGGCTCCGTGAACGGC	ATGAGATTTCCTTCAATTTTTACTGCTGTTTTATTCGCAGCATCCTCCGCATTAGCTGCTAGCAAAAAAAAAAAAAAAGCAAGCGGTGTGAGCAAGGGCGAGGAGGATAACATGGCCATCATCAAGGAGTTCATGCGCTTCAAGGTGCACATGGAGGGCTCCGTGAACGGC
ATGAGATTTCCTTCAATTTTTACTGCTGTTTTATTCGCAGCATCCTCCGC-------------------------------AGCGGTGTGAGCAAGGGCGAGGAGGATAACATGGCCATCATCAAGGAGTTCATGCGCTTCAAGGTGCACATGGAGGGCTCCGTGAACGGC	3	32	Deletion	0.01	-31		20	MRFPSIFTAVLFAASSAAV*											MRFPSIFTAVLFAASSALAASKKKKKASGVSKGEEDNMAIIKEFMRFKVHMEGSVNG	ATGAGATTTCCTTCAATTTTTACTGCTGTTTTATTCGCAGCATCCTCCGC-------------------------------AGCGGTGTGAGCAAGGGCGAGGAGGATAACATGGCCATCATCAAGGAGTTCATGCGCTTCAAGGTGCACATGGAGGGCTCCGTGAACGGC	ATGAGATTTCCTTCAATTTTTACTGCTGTTTTATTCGCAGCATCCTCCGCATTAGCTGCTAGCAAAAAAAAAAAAAAAGCAAGCGGTGTGAGCAAGGGCGAGGAGGATAACATGGCCATCATCAAGGAGTTCATGCGCTTCAAGGTGCACATGGAGGGCTCCGTGAACGGC
ATGAGATTTCCTTCAATTTTTACTGCTGTTTTATTCGCAGCATCCTCCGC----------------------------GCAAGCGGTGTGAGCAAGGGCGAGGAGGATAACATGGCCATCATCAAGGAGTTCATGCGCTTCAAGGTGCACATGGAGGGCTCCGTGAACGGC	2	35	Deletion	0	-28		21	MRFPSIFTAVLFAASSAQAV*											MRFPSIFTAVLFAASSALAASKKKKKASGVSKGEEDNMAIIKEFMRFKVHMEGSVNG	ATGAGATTTCCTTCAATTTTTACTGCTGTTTTATTCGCAGCATCCTCCGC----------------------------GCAAGCGGTGTGAGCAAGGGCGAGGAGGATAACATGGCCATCATCAAGGAGTTCATGCGCTTCAAGGTGCACATGGAGGGCTCCGTGAACGGC	ATGAGATTTCCTTCAATTTTTACTGCTGTTTTATTCGCAGCATCCTCCGCATTAGCTGCTAGCAAAAAAAAAAAAAAAGCAAGCGGTGTGAGCAAGGGCGAGGAGGATAACATGGCCATCATCAAGGAGTTCATGCGCTTCAAGGTGCACATGGAGGGCTCCGTGAACGGC
ATGAGATTTCCTTCAATTTTTACTGCTGTTTTATTCGCAGCATCCTCCGCATTAGgCTGCTAGCCggggggtcta----------AAGGGCAAGCGGTGTGAGCAAGGGCGAGGAGGATAACATGGCCATCATCAAGGAGTTCATGCGCTTCAAGGTGCACATGGAGGGCTCCGTGAACGGC	2	32	Insertion and Deletion	0	1		21	MRFPSIFTAVLFAASSALGC*											MRFPSIFTAVLFAASSALAASKKKKKASGVSKGEEDNMAIIKEFMRFKVHMEGSVNG	ATGAGATTTCCTTCAATTTTTACTGCTGTTTTATTCGCAGCATCCTCCGCATTAGGCTGCTAGCCGGGGGGTCTA----------AAGGGCAAGCGGTGTGAGCAAGGGCGAGGAGGATAACATGGCCATCATCAAGGAGTTCATGCGCTTCAAGGTGCACATGGAGGGCTCCGTGAACGGC	ATGAGATTTCCTTCAATTTTTACTGCTGTTTTATTCGCAGCATCCTCCGCATTAGCTGCTAGCAAAAAAAAAAAAAAAGCAAGCGGTGTGAGCAAGGGCGAGGAGGATAACATGGCCATCATCAAGGAGTTCATGCGCTTCAAGGTGCACATGGAGGGCTCCGTGAACGGC
ATGAGATTTCCTTCAATTTTTACTGCTGTTTTATTCGCAGCATCCTCCGCATTAGgCTGCTAGcggggagggcaattgC---------------GCAAGCGGTGTGAGCAAGGGCGAGGAGGATAACATGGCCATCATCAAGGAGTTCATGCGCTTCAAGGTGCACATGGAGGGCTCCGTGAACGGC	2	34	Insertion and Deletion	0	1		21	MRFPSIFTAVLFAASSALGC*											MRFPSIFTAVLFAASSALAASKKKKKASGVSKGEEDNMAIIKEFMRFKVHMEGSVNG	ATGAGATTTCCTTCAATTTTTACTGCTGTTTTATTCGCAGCATCCTCCGCATTAGGCTGCTAGCGGGGAGGGCAATTGC---------------GCAAGCGGTGTGAGCAAGGGCGAGGAGGATAACATGGCCATCATCAAGGAGTTCATGCGCTTCAAGGTGCACATGGAGGGCTCCGTGAACGGC	ATGAGATTTCCTTCAATTTTTACTGCTGTTTTATTCGCAGCATCCTCCGCATTAGCTGCTAGCAAAAAAAAAAAAAAAGCAAGCGGTGTGAGCAAGGGCGAGGAGGATAACATGGCCATCATCAAGGAGTTCATGCGCTTCAAGGTGCACATGGAGGGCTCCGTGAACGGC
ATGAGATTTCCTTCAATTTTTACTGCTGTTTTATTCGCAGCATCCTCCGCATTAGgCTGCTAGCtgcattc-------------AATcccgtgCAAGCGGTGTGAGCAAGGGCGAGGAGGATAACATGGCCATCATCAAGGAGTTCATGCGCTTCAAGGTGCACATGGAGGGCTCCGTGAACGGC	2	32	Insertion and Deletion	0	1		21	MRFPSIFTAVLFAASSALGC*											MRFPSIFTAVLFAASSALAASKKKKKASGVSKGEEDNMAIIKEFMRFKVHMEGSVNG	ATGAGATTTCCTTCAATTTTTACTGCTGTTTTATTCGCAGCATCCTCCGCATTAGGCTGCTAGCTGCATTC-------------AATCCCGTGCAAGCGGTGTGAGCAAGGGCGAGGAGGATAACATGGCCATCATCAAGGAGTTCATGCGCTTCAAGGTGCACATGGAGGGCTCCGTGAACGGC	ATGAGATTTCCTTCAATTTTTACTGCTGTTTTATTCGCAGCATCCTCCGCATTAGCTGCTAGCAAAAAAAAAAAAAAAGCAAGCGGTGTGAGCAAGGGCGAGGAGGATAACATGGCCATCATCAAGGAGTTCATGCGCTTCAAGGTGCACATGGAGGGCTCCGTGAACGGC
ATGAGATTTCCTTCAATTTTTACTGCTGTTTTATTCGCAGCATCCTCCGCcATTAGCTGCTAGCTTAGTGCACTGATATGCAAGCGGTGTGAGCAAGGGCGAGGAGGATAACATGGCCATCATCAAGGAGTTCATGCGCTTCAAGGTGCACATGGAGGGCTCCGTGAACGGC	2	34	Insertion	0	1		21	MRFPSIFTAVLFAASSAISC*											MRFPSIFTAVLFAASSALAASKKKKKASGVSKGEEDNMAIIKEFMRFKVHMEGSVNG	ATGAGATTTCCTTCAATTTTTACTGCTGTTTTATTCGCAGCATCCTCCGCCATTAGCTGCTAGCTTAGTGCACTGATATGCAAGCGGTGTGAGCAAGGGCGAGGAGGATAACATGGCCATCATCAAGGAGTTCATGCGCTTCAAGGTGCACATGGAGGGCTCCGTGAACGGC	ATGAGATTTCCTTCAATTTTTACTGCTGTTTTATTCGCAGCATCCTCCGCATTAGCTGCTAGCAAAAAAAAAAAAAAAGCAAGCGGTGTGAGCAAGGGCGAGGAGGATAACATGGCCATCATCAAGGAGTTCATGCGCTTCAAGGTGCACATGGAGGGCTCCGTGAACGGC
ATGAGATTTCCTTCAATTTTTACTGCTGTTTTATTCGCAGCCTCCTCC----------------------------CAGCAAGCGGTGTGAGCAAGGGCGAGGAGGATAACATGGCCATCATCAAGGAGTTCATGCGCTTCAAGGTGCACATGGAGGGCTCCGTGAACGGC	2	35	Deletion	0	-28		21	MRFPSIFTAVLFAASSQQAV*											MRFPSIFTAVLFAASSALAASKKKKKASGVSKGEEDNMAIIKEFMRFKVHMEGSVNG	ATGAGATTTCCTTCAATTTTTACTGCTGTTTTATTCGCAGCCTCCTCC----------------------------CAGCAAGCGGTGTGAGCAAGGGCGAGGAGGATAACATGGCCATCATCAAGGAGTTCATGCGCTTCAAGGTGCACATGGAGGGCTCCGTGAACGGC	ATGAGATTTCCTTCAATTTTTACTGCTGTTTTATTCGCAGCATCCTCCGCATTAGCTGCTAGCAAAAAAAAAAAAAAAGCAAGCGGTGTGAGCAAGGGCGAGGAGGATAACATGGCCATCATCAAGGAGTTCATGCGCTTCAAGGTGCACATGGAGGGCTCCGTGAACGGC
ATGAGATCTCCTTCAATTTTTACTGCTGTTTTATTCGCAGCATCCTCCGCATTAGgCTGCTAGCTgtttgaggagtta-------------GGCAAGCGGTGTGAGCAAGGGCGAGGAGGATAACATGGCCATCATCAAGGAGTTCATGCGCTTCAAGGTGCACATGGAGGGCTCCGTGAACGGC	1	36	Insertion and Deletion	0	1		21	MRSPSIFTAVLFAASSALGC*											MRFPSIFTAVLFAASSALAASKKKKKASGVSKGEEDNMAIIKEFMRFKVHMEGSVNG	ATGAGATCTCCTTCAATTTTTACTGCTGTTTTATTCGCAGCATCCTCCGCATTAGGCTGCTAGCTGTTTGAGGAGTTA-------------GGCAAGCGGTGTGAGCAAGGGCGAGGAGGATAACATGGCCATCATCAAGGAGTTCATGCGCTTCAAGGTGCACATGGAGGGCTCCGTGAACGGC	ATGAGATTTCCTTCAATTTTTACTGCTGTTTTATTCGCAGCATCCTCCGCATTAGCTGCTAGCAAAAAAAAAAAAAAAGCAAGCGGTGTGAGCAAGGGCGAGGAGGATAACATGGCCATCATCAAGGAGTTCATGCGCTTCAAGGTGCACATGGAGGGCTCCGTGAACGGC
ATGAGATTTCATTCAATTTTTACTGCTGTTTTATTCGCAGCATCCTCCGCATTAGCTGCTtAGCCAATAGAGTTTCGATGCAAGCGGTGTGAGCAAGGGCGAGGAGGATAACATGGCCATCATCAAGGAGTTCATGCGCTTCAAGGTGCACATGGAGGGCTCCGTGAACGGC	1	33	Insertion	0	1		21	MRFHSIFTAVLFAASSALAA*											MRFPSIFTAVLFAASSALAASKKKKKASGVSKGEEDNMAIIKEFMRFKVHMEGSVNG	ATGAGATTTCATTCAATTTTTACTGCTGTTTTATTCGCAGCATCCTCCGCATTAGCTGCTTAGCCAATAGAGTTTCGATGCAAGCGGTGTGAGCAAGGGCGAGGAGGATAACATGGCCATCATCAAGGAGTTCATGCGCTTCAAGGTGCACATGGAGGGCTCCGTGAACGGC	ATGAGATTTCCTTCAATTTTTACTGCTGTTTTATTCGCAGCATCCTCCGCATTAGCTGCTAGCAAAAAAAAAAAAAAAGCAAGCGGTGTGAGCAAGGGCGAGGAGGATAACATGGCCATCATCAAGGAGTTCATGCGCTTCAAGGTGCACATGGAGGGCTCCGTGAACGGC
ATGAGATTTCCTTCAATTTTTACTGCTGTTTTATTCGCAGCATCCTCAGCATTAaGCTGCTAGCCcctcctagtagttt--------------GCAAGCGGTGTGAGCAAGGGCGAGGAGGATAACATGGCCATCATCAAGGAGTTCATGCGCTTCAAGGTGCACATGGAGGGCTCCGTGAACGGC	1	28	Insertion and Deletion	0	1		21	MRFPSIFTAVLFAASSALSC*											MRFPSIFTAVLFAASSALAASKKKKKASGVSKGEEDNMAIIKEFMRFKVHMEGSVNG	ATGAGATTTCCTTCAATTTTTACTGCTGTTTTATTCGCAGCATCCTCAGCATTAAGCTGCTAGCCCCTCCTAGTAGTTT--------------GCAAGCGGTGTGAGCAAGGGCGAGGAGGATAACATGGCCATCATCAAGGAGTTCATGCGCTTCAAGGTGCACATGGAGGGCTCCGTGAACGGC	ATGAGATTTCCTTCAATTTTTACTGCTGTTTTATTCGCAGCATCCTCCGCATTAGCTGCTAGCAAAAAAAAAAAAAAAGCAAGCGGTGTGAGCAAGGGCGAGGAGGATAACATGGCCATCATCAAGGAGTTCATGCGCTTCAAGGTGCACATGGAGGGCTCCGTGAACGGC
ATGAGATTTCCTTCAATTTTTACTGCTGTTTTATTCGCAGCATCCTCCGCATTAaGCTGCTAGC---------------GCgagttttcgatttgcAAGCGGTGTGAGCAAGGGCGAGGAGGATAACATGGCCATCATCAAGGAGTTCATGCGCTTCAAGGTGCACATGGAGGGCTCCGTGAACGGC	1	35	Insertion and Deletion	0	1		21	MRFPSIFTAVLFAASSALSC*											MRFPSIFTAVLFAASSALAASKKKKKASGVSKGEEDNMAIIKEFMRFKVHMEGSVNG	ATGAGATTTCCTTCAATTTTTACTGCTGTTTTATTCGCAGCATCCTCCGCATTAAGCTGCTAGC---------------GCGAGTTTTCGATTTGCAAGCGGTGTGAGCAAGGGCGAGGAGGATAACATGGCCATCATCAAGGAGTTCATGCGCTTCAAGGTGCACATGGAGGGCTCCGTGAACGGC	ATGAGATTTCCTTCAATTTTTACTGCTGTTTTATTCGCAGCATCCTCCGCATTAGCTGCTAGCAAAAAAAAAAAAAAAGCAAGCGGTGTGAGCAAGGGCGAGGAGGATAACATGGCCATCATCAAGGAGTTCATGCGCTTCAAGGTGCACATGGAGGGCTCCGTGAACGGC
ATGAGATTTCCTTCAATTTTTACTGCTGTTTTATTCGCAGCATCCTCCGCATTAaGCTGCTAGC---------------GTcaccgtcatctgggcAAGCGGTGTGAGCAAGGGCGAGGAGGATAACATGGCCATCATCAAGGAGTTCATGCGCTTCAAGGTGCACATGGAGGGCTCCGTGAACGGC	1	36	Insertion and Deletion	0	1		21	MRFPSIFTAVLFAASSALSC*											MRFPSIFTAVLFAASSALAASKKKKKASGVSKGEEDNMAIIKEFMRFKVHMEGSVNG	ATGAGATTTCCTTCAATTTTTACTGCTGTTTTATTCGCAGCATCCTCCGCATTAAGCTGCTAGC---------------GTCACCGTCATCTGGGCAAGCGGTGTGAGCAAGGGCGAGGAGGATAACATGGCCATCATCAAGGAGTTCATGCGCTTCAAGGTGCACATGGAGGGCTCCGTGAACGGC	ATGAGATTTCCTTCAATTTTTACTGCTGTTTTATTCGCAGCATCCTCCGCATTAGCTGCTAGCAAAAAAAAAAAAAAAGCAAGCGGTGTGAGCAAGGGCGAGGAGGATAACATGGCCATCATCAAGGAGTTCATGCGCTTCAAGGTGCACATGGAGGGCTCCGTGAACGGC
ATGAGATTTCCTTCAATTTTTACTGCTGTTTTATTCGCAGCATCCTCCGCATTAaGCTGCTAGC------------CAACcatcattctcggCAAGCGGTGTGAGCAAGGGCGAGGAGGATAACATGGCCATCATCAAGGAGTTCATGCGCTTCAAGGTGCACATGGAGGGCTCCGTGAACGGC	1	24	Insertion and Deletion	0	1		21	MRFPSIFTAVLFAASSALSC*											MRFPSIFTAVLFAASSALAASKKKKKASGVSKGEEDNMAIIKEFMRFKVHMEGSVNG	ATGAGATTTCCTTCAATTTTTACTGCTGTTTTATTCGCAGCATCCTCCGCATTAAGCTGCTAGC------------CAACCATCATTCTCGGCAAGCGGTGTGAGCAAGGGCGAGGAGGATAACATGGCCATCATCAAGGAGTTCATGCGCTTCAAGGTGCACATGGAGGGCTCCGTGAACGGC	ATGAGATTTCCTTCAATTTTTACTGCTGTTTTATTCGCAGCATCCTCCGCATTAGCTGCTAGCAAAAAAAAAAAAAAAGCAAGCGGTGTGAGCAAGGGCGAGGAGGATAACATGGCCATCATCAAGGAGTTCATGCGCTTCAAGGTGCACATGGAGGGCTCCGTGAACGGC
ATGAGATTTCCTTCAATTTTTACTGCTGTTTTATTCGCAGCATCCTCCGCATTAaGCTGCTAGC------------CATgtagggagtctaGCAAGCGGTGTGAGCAAGGGCGAGGAGGATAACATGGCCATCATCAAGGAGTTCATGCGCTTCAAGGTGCACATGGAGGGCTCCGTGAACGGC	1	36	Insertion and Deletion	0	1		21	MRFPSIFTAVLFAASSALSC*											MRFPSIFTAVLFAASSALAASKKKKKASGVSKGEEDNMAIIKEFMRFKVHMEGSVNG	ATGAGATTTCCTTCAATTTTTACTGCTGTTTTATTCGCAGCATCCTCCGCATTAAGCTGCTAGC------------CATGTAGGGAGTCTAGCAAGCGGTGTGAGCAAGGGCGAGGAGGATAACATGGCCATCATCAAGGAGTTCATGCGCTTCAAGGTGCACATGGAGGGCTCCGTGAACGGC	ATGAGATTTCCTTCAATTTTTACTGCTGTTTTATTCGCAGCATCCTCCGCATTAGCTGCTAGCAAAAAAAAAAAAAAAGCAAGCGGTGTGAGCAAGGGCGAGGAGGATAACATGGCCATCATCAAGGAGTTCATGCGCTTCAAGGTGCACATGGAGGGCTCCGTGAACGGC
ATGAGATTTCCTTCAATTTTTACTGCTGTTTTATTCGCAGCATCCTCCGCATTAaGCTGCTAGC------------CTATcgggtgtgtctgCAAGCGGTGTGAGCAAGGGCGAGGAGGATAACATGGCCATCATCAAGGAGTTCATGCGCTTCAAGGTGCACATGGAGGGCTCCGTGAACGGC	1	35	Insertion and Deletion	0	1		21	MRFPSIFTAVLFAASSALSC*											MRFPSIFTAVLFAASSALAASKKKKKASGVSKGEEDNMAIIKEFMRFKVHMEGSVNG	ATGAGATTTCCTTCAATTTTTACTGCTGTTTTATTCGCAGCATCCTCCGCATTAAGCTGCTAGC------------CTATCGGGTGTGTCTGCAAGCGGTGTGAGCAAGGGCGAGGAGGATAACATGGCCATCATCAAGGAGTTCATGCGCTTCAAGGTGCACATGGAGGGCTCCGTGAACGGC	ATGAGATTTCCTTCAATTTTTACTGCTGTTTTATTCGCAGCATCCTCCGCATTAGCTGCTAGCAAAAAAAAAAAAAAAGCAAGCGGTGTGAGCAAGGGCGAGGAGGATAACATGGCCATCATCAAGGAGTTCATGCGCTTCAAGGTGCACATGGAGGGCTCCGTGAACGGC
ATGAGATTTCCTTCAATTTTTACTGCTGTTTTATTCGCAGCATCCTCCGCATTAaGCTGCTAGC-----------AGtccgggaAATttggCAAGCGGTGTGAGCAAGGGCGAGGAGGATAACATGGCCATCATCAAGGAGTTCATGCGCTTCAAGGTGCACATGGAGGGCTCCGTGAACGGC	1	36	Insertion and Deletion	0	1		21	MRFPSIFTAVLFAASSALSC*											MRFPSIFTAVLFAASSALAASKKKKKASGVSKGEEDNMAIIKEFMRFKVHMEGSVNG	ATGAGATTTCCTTCAATTTTTACTGCTGTTTTATTCGCAGCATCCTCCGCATTAAGCTGCTAGC-----------AGTCCGGGAAATTTGGCAAGCGGTGTGAGCAAGGGCGAGGAGGATAACATGGCCATCATCAAGGAGTTCATGCGCTTCAAGGTGCACATGGAGGGCTCCGTGAACGGC	ATGAGATTTCCTTCAATTTTTACTGCTGTTTTATTCGCAGCATCCTCCGCATTAGCTGCTAGCAAAAAAAAAAAAAAAGCAAGCGGTGTGAGCAAGGGCGAGGAGGATAACATGGCCATCATCAAGGAGTTCATGCGCTTCAAGGTGCACATGGAGGGCTCCGTGAACGGC
ATGAGATTTCCTTCAATTTTTACTGCTGTTTTATTCGCAGCATCCTCCGCATTAaGCTGCTAGC-----------CACgctttatttcaTGCAAGCGGTGTGAGCAAGGGCGAGGAGGATAACATGGCCATCATCAAGGAGTTCATGCGCTTCAAGGTGCACATGGAGGGCTCCGTGAACGGC	1	32	Insertion and Deletion	0	1		21	MRFPSIFTAVLFAASSALSC*											MRFPSIFTAVLFAASSALAASKKKKKASGVSKGEEDNMAIIKEFMRFKVHMEGSVNG	ATGAGATTTCCTTCAATTTTTACTGCTGTTTTATTCGCAGCATCCTCCGCATTAAGCTGCTAGC-----------CACGCTTTATTTCATGCAAGCGGTGTGAGCAAGGGCGAGGAGGATAACATGGCCATCATCAAGGAGTTCATGCGCTTCAAGGTGCACATGGAGGGCTCCGTGAACGGC	ATGAGATTTCCTTCAATTTTTACTGCTGTTTTATTCGCAGCATCCTCCGCATTAGCTGCTAGCAAAAAAAAAAAAAAAGCAAGCGGTGTGAGCAAGGGCGAGGAGGATAACATGGCCATCATCAAGGAGTTCATGCGCTTCAAGGTGCACATGGAGGGCTCCGTGAACGGC
ATGAGATTTCCTTCAATTTTTACTGCTGTTTTATTCGCAGCATCCTCCGCATTAaGCTGCTAGC-----------CCAAGtgccgttcgggCAAGCGGTGTGAGCAAGGGCGAGGAGGATAACATGGCCATCATCAAGGAGTTCATGCGCTTCAAGGTGCACATGGAGGGCTCCGTGAACGGC	1	23	Insertion and Deletion	0	1		21	MRFPSIFTAVLFAASSALSC*											MRFPSIFTAVLFAASSALAASKKKKKASGVSKGEEDNMAIIKEFMRFKVHMEGSVNG	ATGAGATTTCCTTCAATTTTTACTGCTGTTTTATTCGCAGCATCCTCCGCATTAAGCTGCTAGC-----------CCAAGTGCCGTTCGGGCAAGCGGTGTGAGCAAGGGCGAGGAGGATAACATGGCCATCATCAAGGAGTTCATGCGCTTCAAGGTGCACATGGAGGGCTCCGTGAACGGC	ATGAGATTTCCTTCAATTTTTACTGCTGTTTTATTCGCAGCATCCTCCGCATTAGCTGCTAGCAAAAAAAAAAAAAAAGCAAGCGGTGTGAGCAAGGGCGAGGAGGATAACATGGCCATCATCAAGGAGTTCATGCGCTTCAAGGTGCACATGGAGGGCTCCGTGAACGGC
ATGAGATTTCCTTCAATTTTTACTGCTGTTTTATTCGCAGCATCCTCCGCATTAaGCTGCTAGC-----------GATAGctgagaggtgCAAGCGGTGTGAGCAAGGGCGAGGAGGATAACATGGCCATCATCAAGGAGTTCATGCGCTTCAAGGTGCACATGGAGGGCTCCGTGAACGGC	1	35	Insertion and Deletion	0	0		21	MRFPSIFTAVLFAASSALSC*											MRFPSIFTAVLFAASSALAASKKKKKASGVSKGEEDNMAIIKEFMRFKVHMEGSVNG	ATGAGATTTCCTTCAATTTTTACTGCTGTTTTATTCGCAGCATCCTCCGCATTAAGCTGCTAGC-----------GATAGCTGAGAGGTGCAAGCGGTGTGAGCAAGGGCGAGGAGGATAACATGGCCATCATCAAGGAGTTCATGCGCTTCAAGGTGCACATGGAGGGCTCCGTGAACGGC	ATGAGATTTCCTTCAATTTTTACTGCTGTTTTATTCGCAGCATCCTCCGCATTAGCTGCTAGCAAAAAAAAAAAAAAAGCAAGCGGTGTGAGCAAGGGCGAGGAGGATAACATGGCCATCATCAAGGAGTTCATGCGCTTCAAGGTGCACATGGAGGGCTCCGTGAACGGC
ATGAGATTTCCTTCAATTTTTACTGCTGTTTTATTCGCAGCATCCTCCGCATTAaGCTGCTAGC-----------TAGATgacgttcttggCAAGCGGTGTGAGCAAGGGCGAGGAGGATAACATGGCCATCATCAAGGAGTTCATGCGCTTCAAGGTGCACATGGAGGGCTCCGTGAACGGC	1	27	Insertion and Deletion	0	1		21	MRFPSIFTAVLFAASSALSC*											MRFPSIFTAVLFAASSALAASKKKKKASGVSKGEEDNMAIIKEFMRFKVHMEGSVNG	ATGAGATTTCCTTCAATTTTTACTGCTGTTTTATTCGCAGCATCCTCCGCATTAAGCTGCTAGC-----------TAGATGACGTTCTTGGCAAGCGGTGTGAGCAAGGGCGAGGAGGATAACATGGCCATCATCAAGGAGTTCATGCGCTTCAAGGTGCACATGGAGGGCTCCGTGAACGGC	ATGAGATTTCCTTCAATTTTTACTGCTGTTTTATTCGCAGCATCCTCCGCATTAGCTGCTAGCAAAAAAAAAAAAAAAGCAAGCGGTGTGAGCAAGGGCGAGGAGGATAACATGGCCATCATCAAGGAGTTCATGCGCTTCAAGGTGCACATGGAGGGCTCCGTGAACGGC
ATGAGATTTCCTTCAATTTTTACTGCTGTTTTATTCGCAGCATCCTCCGCATTAaGCTGCTAGC----------CCAAATcttcatgtcgCAAGCGGTGTGAGCAAGGGCGAGGAGGATAACATGGCCATCATCAAGGAGTTCATGCGCTTCAAGGTGCACATGGAGGGCTCCGTGAACGGC	1	34	Insertion and Deletion	0	1		21	MRFPSIFTAVLFAASSALSC*											MRFPSIFTAVLFAASSALAASKKKKKASGVSKGEEDNMAIIKEFMRFKVHMEGSVNG	ATGAGATTTCCTTCAATTTTTACTGCTGTTTTATTCGCAGCATCCTCCGCATTAAGCTGCTAGC----------CCAAATCTTCATGTCGCAAGCGGTGTGAGCAAGGGCGAGGAGGATAACATGGCCATCATCAAGGAGTTCATGCGCTTCAAGGTGCACATGGAGGGCTCCGTGAACGGC	ATGAGATTTCCTTCAATTTTTACTGCTGTTTTATTCGCAGCATCCTCCGCATTAGCTGCTAGCAAAAAAAAAAAAAAAGCAAGCGGTGTGAGCAAGGGCGAGGAGGATAACATGGCCATCATCAAGGAGTTCATGCGCTTCAAGGTGCACATGGAGGGCTCCGTGAACGGC
ATGAGATTTCCTTCAATTTTTACTGCTGTTTTATTCGCAGCATCCTCCGCATTAaGCTGCTAGC----------GATtatgacccaGAGCAAGCGGTGTGAGCAAGGGCGAGGAGGATAACATGGCCATCATCAAGGAGTTCATGCGCTTCAAGGTGCACATGGAGGGCTCCGTGAACGGC	1	32	Insertion and Deletion	0	0		21	MRFPSIFTAVLFAASSALSC*											MRFPSIFTAVLFAASSALAASKKKKKASGVSKGEEDNMAIIKEFMRFKVHMEGSVNG	ATGAGATTTCCTTCAATTTTTACTGCTGTTTTATTCGCAGCATCCTCCGCATTAAGCTGCTAGC----------GATTATGACCCAGAGCAAGCGGTGTGAGCAAGGGCGAGGAGGATAACATGGCCATCATCAAGGAGTTCATGCGCTTCAAGGTGCACATGGAGGGCTCCGTGAACGGC	ATGAGATTTCCTTCAATTTTTACTGCTGTTTTATTCGCAGCATCCTCCGCATTAGCTGCTAGCAAAAAAAAAAAAAAAGCAAGCGGTGTGAGCAAGGGCGAGGAGGATAACATGGCCATCATCAAGGAGTTCATGCGCTTCAAGGTGCACATGGAGGGCTCCGTGAACGGC
ATGAGATTTCCTTCAATTTTTACTGCTGTTTTATTCGCAGCATCCTCCGCATTAaGCTGCTAGC---------ACAATACtccttttggCAAGCGGTGTGAGCAAGGGCGAGGAGGATAACATGGCCATCATCAAGGAGTTCATGCGCTTCAAGGTGCACATGGAGGGCTCCGTGAACGGC	1	34	Insertion and Deletion	0	1		21	MRFPSIFTAVLFAASSALSC*											MRFPSIFTAVLFAASSALAASKKKKKASGVSKGEEDNMAIIKEFMRFKVHMEGSVNG	ATGAGATTTCCTTCAATTTTTACTGCTGTTTTATTCGCAGCATCCTCCGCATTAAGCTGCTAGC---------ACAATACTCCTTTTGGCAAGCGGTGTGAGCAAGGGCGAGGAGGATAACATGGCCATCATCAAGGAGTTCATGCGCTTCAAGGTGCACATGGAGGGCTCCGTGAACGGC	ATGAGATTTCCTTCAATTTTTACTGCTGTTTTATTCGCAGCATCCTCCGCATTAGCTGCTAGCAAAAAAAAAAAAAAAGCAAGCGGTGTGAGCAAGGGCGAGGAGGATAACATGGCCATCATCAAGGAGTTCATGCGCTTCAAGGTGCACATGGAGGGCTCCGTGAACGGC
ATGAGATTTCCTTCAATTTTTACTGCTGTTTTATTCGCAGCATCCTCCGCATTAaGCTGCTAGCAGAACAACGCACGCGGCAAGCGGTGTGAGCAAGGGCGAGGAGGATAACATGGCCATCATCAAGGAGTTCATGCGCTTCAAGGTGCACATGGAGGGCTCCGTGAACGGC	1	34	Insertion	0	1		21	MRFPSIFTAVLFAASSALSC*											MRFPSIFTAVLFAASSALAASKKKKKASGVSKGEEDNMAIIKEFMRFKVHMEGSVNG	ATGAGATTTCCTTCAATTTTTACTGCTGTTTTATTCGCAGCATCCTCCGCATTAAGCTGCTAGCAGAACAACGCACGCGGCAAGCGGTGTGAGCAAGGGCGAGGAGGATAACATGGCCATCATCAAGGAGTTCATGCGCTTCAAGGTGCACATGGAGGGCTCCGTGAACGGC	ATGAGATTTCCTTCAATTTTTACTGCTGTTTTATTCGCAGCATCCTCCGCATTAGCTGCTAGCAAAAAAAAAAAAAAAGCAAGCGGTGTGAGCAAGGGCGAGGAGGATAACATGGCCATCATCAAGGAGTTCATGCGCTTCAAGGTGCACATGGAGGGCTCCGTGAACGGC
ATGAGATTTCCTTCAATTTTTACTGCTGTTTTATTCGCAGCATCCTCCGCATTAaGCTGCTAGCATAATCTAGGATTGAGCAAGCGGTGTGAGCAAGGGCGAGGAGGATAACATGGCCATCATCAAGGAGTTCATGCGCTTCAAGGTGCACATGGAGGGCTCCGTGAACGGC	1	35	Insertion	0	1		21	MRFPSIFTAVLFAASSALSC*											MRFPSIFTAVLFAASSALAASKKKKKASGVSKGEEDNMAIIKEFMRFKVHMEGSVNG	ATGAGATTTCCTTCAATTTTTACTGCTGTTTTATTCGCAGCATCCTCCGCATTAAGCTGCTAGCATAATCTAGGATTGAGCAAGCGGTGTGAGCAAGGGCGAGGAGGATAACATGGCCATCATCAAGGAGTTCATGCGCTTCAAGGTGCACATGGAGGGCTCCGTGAACGGC	ATGAGATTTCCTTCAATTTTTACTGCTGTTTTATTCGCAGCATCCTCCGCATTAGCTGCTAGCAAAAAAAAAAAAAAAGCAAGCGGTGTGAGCAAGGGCGAGGAGGATAACATGGCCATCATCAAGGAGTTCATGCGCTTCAAGGTGCACATGGAGGGCTCCGTGAACGGC
ATGAGATTTCCTTCAATTTTTACTGCTGTTTTATTCGCAGCATCCTCCGCATTAaGCTGCTAGCCCAGTTATTAGAAAAGCAAGCGGTGTGAGCAAGGGCGAGGAGGATAACATGGCCATCATCAAGGAGTTCATGCGCTTCAAGGTGCACATGGAGGGCTCCGTGAACGGC	1	29	Insertion	0	1		21	MRFPSIFTAVLFAASSALSC*											MRFPSIFTAVLFAASSALAASKKKKKASGVSKGEEDNMAIIKEFMRFKVHMEGSVNG	ATGAGATTTCCTTCAATTTTTACTGCTGTTTTATTCGCAGCATCCTCCGCATTAAGCTGCTAGCCCAGTTATTAGAAAAGCAAGCGGTGTGAGCAAGGGCGAGGAGGATAACATGGCCATCATCAAGGAGTTCATGCGCTTCAAGGTGCACATGGAGGGCTCCGTGAACGGC	ATGAGATTTCCTTCAATTTTTACTGCTGTTTTATTCGCAGCATCCTCCGCATTAGCTGCTAGCAAAAAAAAAAAAAAAGCAAGCGGTGTGAGCAAGGGCGAGGAGGATAACATGGCCATCATCAAGGAGTTCATGCGCTTCAAGGTGCACATGGAGGGCTCCGTGAACGGC
ATGAGATTTCCTTCAATTTTTACTGCTGTTTTATTCGCAGCATCCTCCGCATTAaGCTGCTAGCCCCAAGAGTGACGAGGCAAGCGGTGTGAGCAAGGGCGAGGAGGATAACATGGCCATCATCAAGGAGTTCATGCGCTTCAAGGTGCACATGGAGGGCTCCGTGAACGGC	1	36	Insertion	0	1		21	MRFPSIFTAVLFAASSALSC*											MRFPSIFTAVLFAASSALAASKKKKKASGVSKGEEDNMAIIKEFMRFKVHMEGSVNG	ATGAGATTTCCTTCAATTTTTACTGCTGTTTTATTCGCAGCATCCTCCGCATTAAGCTGCTAGCCCCAAGAGTGACGAGGCAAGCGGTGTGAGCAAGGGCGAGGAGGATAACATGGCCATCATCAAGGAGTTCATGCGCTTCAAGGTGCACATGGAGGGCTCCGTGAACGGC	ATGAGATTTCCTTCAATTTTTACTGCTGTTTTATTCGCAGCATCCTCCGCATTAGCTGCTAGCAAAAAAAAAAAAAAAGCAAGCGGTGTGAGCAAGGGCGAGGAGGATAACATGGCCATCATCAAGGAGTTCATGCGCTTCAAGGTGCACATGGAGGGCTCCGTGAACGGC
ATGAGATTTCCTTCAATTTTTACTGCTGTTTTATTCGCAGCATCCTCCGCATTAaGCTGCTAGCCctgttattcgga------------ATGCAAGCGGTGTGAGCAAGGGCGAGGAGGATAACATGGCCATCATCAAGGAGTTCATGCGCTTCAAGGTGCACATGGAGGGCTCCGTGAACGGC	1	36	Insertion and Deletion	0	1		21	MRFPSIFTAVLFAASSALSC*											MRFPSIFTAVLFAASSALAASKKKKKASGVSKGEEDNMAIIKEFMRFKVHMEGSVNG	ATGAGATTTCCTTCAATTTTTACTGCTGTTTTATTCGCAGCATCCTCCGCATTAAGCTGCTAGCCCTGTTATTCGGA------------ATGCAAGCGGTGTGAGCAAGGGCGAGGAGGATAACATGGCCATCATCAAGGAGTTCATGCGCTTCAAGGTGCACATGGAGGGCTCCGTGAACGGC	ATGAGATTTCCTTCAATTTTTACTGCTGTTTTATTCGCAGCATCCTCCGCATTAGCTGCTAGCAAAAAAAAAAAAAAAGCAAGCGGTGTGAGCAAGGGCGAGGAGGATAACATGGCCATCATCAAGGAGTTCATGCGCTTCAAGGTGCACATGGAGGGCTCCGTGAACGGC
ATGAGATTTCCTTCAATTTTTACTGCTGTTTTATTCGCAGCATCCTCCGCATTAaGCTGCTAGCCGGAAGAGTTCGATTGCAAGCGGTGTGAGCAAGGGCGAGGAGGATAACATGGCCATCATCAAGGAGTTCATGCGCTTCAAGGTGCACATGGAGGGCTCCGTGAACGGC	1	36	Insertion	0	1		21	MRFPSIFTAVLFAASSALSC*											MRFPSIFTAVLFAASSALAASKKKKKASGVSKGEEDNMAIIKEFMRFKVHMEGSVNG	ATGAGATTTCCTTCAATTTTTACTGCTGTTTTATTCGCAGCATCCTCCGCATTAAGCTGCTAGCCGGAAGAGTTCGATTGCAAGCGGTGTGAGCAAGGGCGAGGAGGATAACATGGCCATCATCAAGGAGTTCATGCGCTTCAAGGTGCACATGGAGGGCTCCGTGAACGGC	ATGAGATTTCCTTCAATTTTTACTGCTGTTTTATTCGCAGCATCCTCCGCATTAGCTGCTAGCAAAAAAAAAAAAAAAGCAAGCGGTGTGAGCAAGGGCGAGGAGGATAACATGGCCATCATCAAGGAGTTCATGCGCTTCAAGGTGCACATGGAGGGCTCCGTGAACGGC
ATGAGATTTCCTTCAATTTTTACTGCTGTTTTATTCGCAGCATCCTCCGCATTAaGCTGCTAGCCgggttta------------AAGgtgtgCAAGCGGTGTGAGCAAGGGCGAGGAGGATAACATGGCCATCATCAAGGAGTTCATGCGCTTCAAGGTGCACATGGAGGGCTCCGTGAACGGC	1	36	Insertion and Deletion	0	1		21	MRFPSIFTAVLFAASSALSC*											MRFPSIFTAVLFAASSALAASKKKKKASGVSKGEEDNMAIIKEFMRFKVHMEGSVNG	ATGAGATTTCCTTCAATTTTTACTGCTGTTTTATTCGCAGCATCCTCCGCATTAAGCTGCTAGCCGGGTTTA------------AAGGTGTGCAAGCGGTGTGAGCAAGGGCGAGGAGGATAACATGGCCATCATCAAGGAGTTCATGCGCTTCAAGGTGCACATGGAGGGCTCCGTGAACGGC	ATGAGATTTCCTTCAATTTTTACTGCTGTTTTATTCGCAGCATCCTCCGCATTAGCTGCTAGCAAAAAAAAAAAAAAAGCAAGCGGTGTGAGCAAGGGCGAGGAGGATAACATGGCCATCATCAAGGAGTTCATGCGCTTCAAGGTGCACATGGAGGGCTCCGTGAACGGC
ATGAGATTTCCTTCAATTTTTACTGCTGTTTTATTCGCAGCATCCTCCGCATTAaGCTGCTAGCGATTACAGGAATTAGGCAAGTGGCGTGAGCAAGGGCGAGGAGGATAACATGGCCATCATCAAGGAGTTCATGCGCTTCAAGGTGCACATGGAGGGCTCCGTGAACGGC	1	26	Insertion	0	1		21	MRFPSIFTAVLFAASSALSC*											MRFPSIFTAVLFAASSALAASKKKKKASGVSKGEEDNMAIIKEFMRFKVHMEGSVNG	ATGAGATTTCCTTCAATTTTTACTGCTGTTTTATTCGCAGCATCCTCCGCATTAAGCTGCTAGCGATTACAGGAATTAGGCAAGTGGCGTGAGCAAGGGCGAGGAGGATAACATGGCCATCATCAAGGAGTTCATGCGCTTCAAGGTGCACATGGAGGGCTCCGTGAACGGC	ATGAGATTTCCTTCAATTTTTACTGCTGTTTTATTCGCAGCATCCTCCGCATTAGCTGCTAGCAAAAAAAAAAAAAAAGCAAGCGGTGTGAGCAAGGGCGAGGAGGATAACATGGCCATCATCAAGGAGTTCATGCGCTTCAAGGTGCACATGGAGGGCTCCGTGAACGGC
ATGAGATTTCCTTCAATTTTTACTGCTGTTTTATTCGCAGCATCCTCCGCATTAaGCTGCTAGCGgggcggtcta----------AGGTGCAAGCGGTGTGAGCAAGGGCGAGGAGGATAACATGGCCATCATCAAGGAGTTCATGCGCTTCAAGGTGCACATGGAGGGCTCCGTGAACGGC	1	35	Insertion and Deletion	0	1		21	MRFPSIFTAVLFAASSALSC*											MRFPSIFTAVLFAASSALAASKKKKKASGVSKGEEDNMAIIKEFMRFKVHMEGSVNG	ATGAGATTTCCTTCAATTTTTACTGCTGTTTTATTCGCAGCATCCTCCGCATTAAGCTGCTAGCGGGGCGGTCTA----------AGGTGCAAGCGGTGTGAGCAAGGGCGAGGAGGATAACATGGCCATCATCAAGGAGTTCATGCGCTTCAAGGTGCACATGGAGGGCTCCGTGAACGGC	ATGAGATTTCCTTCAATTTTTACTGCTGTTTTATTCGCAGCATCCTCCGCATTAGCTGCTAGCAAAAAAAAAAAAAAAGCAAGCGGTGTGAGCAAGGGCGAGGAGGATAACATGGCCATCATCAAGGAGTTCATGCGCTTCAAGGTGCACATGGAGGGCTCCGTGAACGGC
ATGAGATTTCCTTCAATTTTTACTGCTGTTTTATTCGCAGCATCCTCCGCATTAaGCTGCTAGCGGGTAAGAAACTCTCGCAAGCGGTGTGAGCAAGGGCGAGGAGGATAACATGGCCATCATCAAGGAGTTCATGCGCTTCAAGGTGCACATGGAGGGCTCCGTGAACGGC	1	35	Insertion	0	1		21	MRFPSIFTAVLFAASSALSC*											MRFPSIFTAVLFAASSALAASKKKKKASGVSKGEEDNMAIIKEFMRFKVHMEGSVNG	ATGAGATTTCCTTCAATTTTTACTGCTGTTTTATTCGCAGCATCCTCCGCATTAAGCTGCTAGCGGGTAAGAAACTCTCGCAAGCGGTGTGAGCAAGGGCGAGGAGGATAACATGGCCATCATCAAGGAGTTCATGCGCTTCAAGGTGCACATGGAGGGCTCCGTGAACGGC	ATGAGATTTCCTTCAATTTTTACTGCTGTTTTATTCGCAGCATCCTCCGCATTAGCTGCTAGCAAAAAAAAAAAAAAAGCAAGCGGTGTGAGCAAGGGCGAGGAGGATAACATGGCCATCATCAAGGAGTTCATGCGCTTCAAGGTGCACATGGAGGGCTCCGTGAACGGC
ATGAGATTTCCTTCAATTTTTACTGCTGTTTTATTCGCAGCATCCTCCGCATTAaGCTGCTAGCGTAGTAGCAATGGGTGCAAGCGGTGTGAGCAAGGGCGAGGAGGATAACATGGCCATCATCAAGGAGTTCATGCGCTTCAAGGTGCACATGGAGGGCTCCGTGAACGGC	1	36	Insertion	0	1		21	MRFPSIFTAVLFAASSALSC*											MRFPSIFTAVLFAASSALAASKKKKKASGVSKGEEDNMAIIKEFMRFKVHMEGSVNG	ATGAGATTTCCTTCAATTTTTACTGCTGTTTTATTCGCAGCATCCTCCGCATTAAGCTGCTAGCGTAGTAGCAATGGGTGCAAGCGGTGTGAGCAAGGGCGAGGAGGATAACATGGCCATCATCAAGGAGTTCATGCGCTTCAAGGTGCACATGGAGGGCTCCGTGAACGGC	ATGAGATTTCCTTCAATTTTTACTGCTGTTTTATTCGCAGCATCCTCCGCATTAGCTGCTAGCAAAAAAAAAAAAAAAGCAAGCGGTGTGAGCAAGGGCGAGGAGGATAACATGGCCATCATCAAGGAGTTCATGCGCTTCAAGGTGCACATGGAGGGCTCCGTGAACGGC
ATGAGATTTCCTTCAATTTTTACTGCTGTTTTATTCGCAGCATCCTCCGCATTAaGCTGCTAGCGTATTGAACAGGGTGGCAAGCGGTGTGAGCAAGGGCGAGGAGGATAACATGGCCATCATCAAGGAGTTCATGCGCTTCAAGGTGCACATGGAGGGCTCCGTGAACGGC	1	30	Insertion	0	1		21	MRFPSIFTAVLFAASSALSC*											MRFPSIFTAVLFAASSALAASKKKKKASGVSKGEEDNMAIIKEFMRFKVHMEGSVNG	ATGAGATTTCCTTCAATTTTTACTGCTGTTTTATTCGCAGCATCCTCCGCATTAAGCTGCTAGCGTATTGAACAGGGTGGCAAGCGGTGTGAGCAAGGGCGAGGAGGATAACATGGCCATCATCAAGGAGTTCATGCGCTTCAAGGTGCACATGGAGGGCTCCGTGAACGGC	ATGAGATTTCCTTCAATTTTTACTGCTGTTTTATTCGCAGCATCCTCCGCATTAGCTGCTAGCAAAAAAAAAAAAAAAGCAAGCGGTGTGAGCAAGGGCGAGGAGGATAACATGGCCATCATCAAGGAGTTCATGCGCTTCAAGGTGCACATGGAGGGCTCCGTGAACGGC
ATGAGATTTCCTTCAATTTTTACTGCTGTTTTATTCGCAGCATCCTCCGCATTAaGCTGCTAGCGTTTAACATAGTGTGGCAAGCGGTGTGAGCAAGGGCGAGGAGGATAACATGGCCATCATCAAGGAGTTCATGCGCTTCAAGGTGCACATGGAGGGCTCCGTGAACGGC	1	36	Insertion	0	1		21	MRFPSIFTAVLFAASSALSC*											MRFPSIFTAVLFAASSALAASKKKKKASGVSKGEEDNMAIIKEFMRFKVHMEGSVNG	ATGAGATTTCCTTCAATTTTTACTGCTGTTTTATTCGCAGCATCCTCCGCATTAAGCTGCTAGCGTTTAACATAGTGTGGCAAGCGGTGTGAGCAAGGGCGAGGAGGATAACATGGCCATCATCAAGGAGTTCATGCGCTTCAAGGTGCACATGGAGGGCTCCGTGAACGGC	ATGAGATTTCCTTCAATTTTTACTGCTGTTTTATTCGCAGCATCCTCCGCATTAGCTGCTAGCAAAAAAAAAAAAAAAGCAAGCGGTGTGAGCAAGGGCGAGGAGGATAACATGGCCATCATCAAGGAGTTCATGCGCTTCAAGGTGCACATGGAGGGCTCCGTGAACGGC
ATGAGATTTCCTTCAATTTTTACTGCTGTTTTATTCGCAGCATCCTCCGCATTAaGCTGCTAGCTAGGTACTAGTATATGCAAGCGGTGTGAGCAAGGGCGAGGAGGATAACATGGCCATCATCAAGGAGTTCATGCGCTTCAAGGTGCACATGGAGGGCTCCGTGAACGGC	1	36	Insertion	0	1		21	MRFPSIFTAVLFAASSALSC*											MRFPSIFTAVLFAASSALAASKKKKKASGVSKGEEDNMAIIKEFMRFKVHMEGSVNG	ATGAGATTTCCTTCAATTTTTACTGCTGTTTTATTCGCAGCATCCTCCGCATTAAGCTGCTAGCTAGGTACTAGTATATGCAAGCGGTGTGAGCAAGGGCGAGGAGGATAACATGGCCATCATCAAGGAGTTCATGCGCTTCAAGGTGCACATGGAGGGCTCCGTGAACGGC	ATGAGATTTCCTTCAATTTTTACTGCTGTTTTATTCGCAGCATCCTCCGCATTAGCTGCTAGCAAAAAAAAAAAAAAAGCAAGCGGTGTGAGCAAGGGCGAGGAGGATAACATGGCCATCATCAAGGAGTTCATGCGCTTCAAGGTGCACATGGAGGGCTCCGTGAACGGC
ATGAGATTTCCTTCAATTTTTACTGCTGTTTTATTCGCAGCATCCTCCGCATTAaGCTGCTAGCTATGAATGTAAAGTTGCAAGCGGTGTGAGCAAGGGCGAGGAGGATAACATGGCCATCATCAAGGAGTTCATGCGCTTCAAGGTGCACATGGAGGGCTCCGTGAACGGC	1	33	Insertion	0	1		21	MRFPSIFTAVLFAASSALSC*											MRFPSIFTAVLFAASSALAASKKKKKASGVSKGEEDNMAIIKEFMRFKVHMEGSVNG	ATGAGATTTCCTTCAATTTTTACTGCTGTTTTATTCGCAGCATCCTCCGCATTAAGCTGCTAGCTATGAATGTAAAGTTGCAAGCGGTGTGAGCAAGGGCGAGGAGGATAACATGGCCATCATCAAGGAGTTCATGCGCTTCAAGGTGCACATGGAGGGCTCCGTGAACGGC	ATGAGATTTCCTTCAATTTTTACTGCTGTTTTATTCGCAGCATCCTCCGCATTAGCTGCTAGCAAAAAAAAAAAAAAAGCAAGCGGTGTGAGCAAGGGCGAGGAGGATAACATGGCCATCATCAAGGAGTTCATGCGCTTCAAGGTGCACATGGAGGGCTCCGTGAACGGC
ATGAGATTTCCTTCAATTTTTACTGCTGTTTTATTCGCAGCATCCTCCGCATTAaGCTGCTAGCTGAGAGAGGCAACTTGCAAGCGGTGTGAGCAAGGGCGAGGAGGATAACATGGCCATCATCAAGGAGTTCATGCGCTTCAAGGTGCACATGGAGGGCTCCGTGAACGGC	1	36	Insertion	0	1		21	MRFPSIFTAVLFAASSALSC*											MRFPSIFTAVLFAASSALAASKKKKKASGVSKGEEDNMAIIKEFMRFKVHMEGSVNG	ATGAGATTTCCTTCAATTTTTACTGCTGTTTTATTCGCAGCATCCTCCGCATTAAGCTGCTAGCTGAGAGAGGCAACTTGCAAGCGGTGTGAGCAAGGGCGAGGAGGATAACATGGCCATCATCAAGGAGTTCATGCGCTTCAAGGTGCACATGGAGGGCTCCGTGAACGGC	ATGAGATTTCCTTCAATTTTTACTGCTGTTTTATTCGCAGCATCCTCCGCATTAGCTGCTAGCAAAAAAAAAAAAAAAGCAAGCGGTGTGAGCAAGGGCGAGGAGGATAACATGGCCATCATCAAGGAGTTCATGCGCTTCAAGGTGCACATGGAGGGCTCCGTGAACGGC
ATGAGATTTCCTTCAATTTTTACTGCTGTTTTATTCGCAGCATCCTCCGCATTAaGCTGCTAGCTgcccgcgta-------------ATtgggCAAGCGGTGTGAGCAAGGGCGAGGAGGATAACATGGCCATCATCAAGGAGTTCATGCGCTTCAAGGTGCACATGGAGGGCTCCGTGAACGGC	1	30	Insertion and Deletion	0	1		21	MRFPSIFTAVLFAASSALSC*											MRFPSIFTAVLFAASSALAASKKKKKASGVSKGEEDNMAIIKEFMRFKVHMEGSVNG	ATGAGATTTCCTTCAATTTTTACTGCTGTTTTATTCGCAGCATCCTCCGCATTAAGCTGCTAGCTGCCCGCGTA-------------ATTGGGCAAGCGGTGTGAGCAAGGGCGAGGAGGATAACATGGCCATCATCAAGGAGTTCATGCGCTTCAAGGTGCACATGGAGGGCTCCGTGAACGGC	ATGAGATTTCCTTCAATTTTTACTGCTGTTTTATTCGCAGCATCCTCCGCATTAGCTGCTAGCAAAAAAAAAAAAAAAGCAAGCGGTGTGAGCAAGGGCGAGGAGGATAACATGGCCATCATCAAGGAGTTCATGCGCTTCAAGGTGCACATGGAGGGCTCCGTGAACGGC
ATGAGATTTCCTTCAATTTTTACTGCTGTTTTATTCGCAGCATCCTCCGCATTAaGCTGCTAGCTgcttccataggttg--------------GCAAGCGGTGTTAGCAAGGGCGAGGAGGATAACATGGCCATCATCAAGGAGTTCATGCGCTTCAAGGTGCACATGGAGGGCTCCGTGAACGGC	1	36	Insertion and Deletion	0	1		21	MRFPSIFTAVLFAASSALSC*											MRFPSIFTAVLFAASSALAASKKKKKASGVSKGEEDNMAIIKEFMRFKVHMEGSVNG	ATGAGATTTCCTTCAATTTTTACTGCTGTTTTATTCGCAGCATCCTCCGCATTAAGCTGCTAGCTGCTTCCATAGGTTG--------------GCAAGCGGTGTTAGCAAGGGCGAGGAGGATAACATGGCCATCATCAAGGAGTTCATGCGCTTCAAGGTGCACATGGAGGGCTCCGTGAACGGC	ATGAGATTTCCTTCAATTTTTACTGCTGTTTTATTCGCAGCATCCTCCGCATTAGCTGCTAGCAAAAAAAAAAAAAAAGCAAGCGGTGTGAGCAAGGGCGAGGAGGATAACATGGCCATCATCAAGGAGTTCATGCGCTTCAAGGTGCACATGGAGGGCTCCGTGAACGGC
ATGAGATTTCCTTCAATTTTTACTGCTGTTTTATTCGCAGCATCCTCCGCATTAaGCTGCTAGCTtggaccttagtctg--------------GCAAGCGGTGTGAGCAAGGGCGAGGAGGATAACATGGCCATCATCAAGGAGTTCATGCGCTTCAAGGTGCACATGGAGGGCTCCGTGAACGGC	1	31	Insertion and Deletion	0	1		21	MRFPSIFTAVLFAASSALSC*											MRFPSIFTAVLFAASSALAASKKKKKASGVSKGEEDNMAIIKEFMRFKVHMEGSVNG	ATGAGATTTCCTTCAATTTTTACTGCTGTTTTATTCGCAGCATCCTCCGCATTAAGCTGCTAGCTTGGACCTTAGTCTG--------------GCAAGCGGTGTGAGCAAGGGCGAGGAGGATAACATGGCCATCATCAAGGAGTTCATGCGCTTCAAGGTGCACATGGAGGGCTCCGTGAACGGC	ATGAGATTTCCTTCAATTTTTACTGCTGTTTTATTCGCAGCATCCTCCGCATTAGCTGCTAGCAAAAAAAAAAAAAAAGCAAGCGGTGTGAGCAAGGGCGAGGAGGATAACATGGCCATCATCAAGGAGTTCATGCGCTTCAAGGTGCACATGGAGGGCTCCGTGAACGGC
ATGAGATTTCCTTCAATTTTTACTGCTGTTTTATTCGCAGCATCCTCCGCATTAaGCTGCTAGCTtgggggtcaccgta--------------GCAAGCGGTGTGAGCAAGGGCGAGGAGGATAACATGGCCATCATCAAGGAGTTCATGCGCTTCAAGGTGCACATGGAGGGCTCCGTGAACGGC	1	35	Insertion and Deletion	0	1		21	MRFPSIFTAVLFAASSALSC*											MRFPSIFTAVLFAASSALAASKKKKKASGVSKGEEDNMAIIKEFMRFKVHMEGSVNG	ATGAGATTTCCTTCAATTTTTACTGCTGTTTTATTCGCAGCATCCTCCGCATTAAGCTGCTAGCTTGGGGGTCACCGTA--------------GCAAGCGGTGTGAGCAAGGGCGAGGAGGATAACATGGCCATCATCAAGGAGTTCATGCGCTTCAAGGTGCACATGGAGGGCTCCGTGAACGGC	ATGAGATTTCCTTCAATTTTTACTGCTGTTTTATTCGCAGCATCCTCCGCATTAGCTGCTAGCAAAAAAAAAAAAAAAGCAAGCGGTGTGAGCAAGGGCGAGGAGGATAACATGGCCATCATCAAGGAGTTCATGCGCTTCAAGGTGCACATGGAGGGCTCCGTGAACGGC
ATGAGATTTCCTTCAATTTTTACTGCTGTTTTATTCGCAGCATCCTCCGCATTAGCcTGCTAGC--------------ACtaccactcccggggCAAGCGGTGTGAGCAAGGGCGAGGAGGATAACATGGCCATCATCAAGGAGTTCATGCGCTTCAAGGTGCACATGGAGGGCTCCGTGAACGGC	1	31	Insertion and Deletion	0	1		21	MRFPSIFTAVLFAASSALAC*											MRFPSIFTAVLFAASSALAASKKKKKASGVSKGEEDNMAIIKEFMRFKVHMEGSVNG	ATGAGATTTCCTTCAATTTTTACTGCTGTTTTATTCGCAGCATCCTCCGCATTAGCCTGCTAGC--------------ACTACCACTCCCGGGGCAAGCGGTGTGAGCAAGGGCGAGGAGGATAACATGGCCATCATCAAGGAGTTCATGCGCTTCAAGGTGCACATGGAGGGCTCCGTGAACGGC	ATGAGATTTCCTTCAATTTTTACTGCTGTTTTATTCGCAGCATCCTCCGCATTAGCTGCTAGCAAAAAAAAAAAAAAAGCAAGCGGTGTGAGCAAGGGCGAGGAGGATAACATGGCCATCATCAAGGAGTTCATGCGCTTCAAGGTGCACATGGAGGGCTCCGTGAACGGC
ATGAGATTTCCTTCAATTTTTACTGCTGTTTTATTCGCAGCATCCTCCGCATTAGCcTGCTAGC-----------TACcatcttcggaGGCAAGCGGTGTGAGCAAGGGCGAGGAGGATAACATGGCCATCATCAAGGAGTTCATGCGCTTCAAGGTGCACATGGAGGGCTCCGTGAACGGC	1	30	Insertion and Deletion	0	0		21	MRFPSIFTAVLFAASSALAC*											MRFPSIFTAVLFAASSALAASKKKKKASGVSKGEEDNMAIIKEFMRFKVHMEGSVNG	ATGAGATTTCCTTCAATTTTTACTGCTGTTTTATTCGCAGCATCCTCCGCATTAGCCTGCTAGC-----------TACCATCTTCGGAGGCAAGCGGTGTGAGCAAGGGCGAGGAGGATAACATGGCCATCATCAAGGAGTTCATGCGCTTCAAGGTGCACATGGAGGGCTCCGTGAACGGC	ATGAGATTTCCTTCAATTTTTACTGCTGTTTTATTCGCAGCATCCTCCGCATTAGCTGCTAGCAAAAAAAAAAAAAAAGCAAGCGGTGTGAGCAAGGGCGAGGAGGATAACATGGCCATCATCAAGGAGTTCATGCGCTTCAAGGTGCACATGGAGGGCTCCGTGAACGGC
ATGAGATTTCCTTCAATTTTTACTGCTGTTTTATTCGCAGCATCCTCCGCATTAGCcTGCTAGC----------ATggttcaAGAGttcgCAAGCGGTGTGAGCAAGGGCGAGGAGGATAACATGGCCATCATCAAGGAGTTCATGCGCTTCAAGGTGCACATGGAGGGCTCCGTGAACGGC	1	36	Insertion and Deletion	0	1		21	MRFPSIFTAVLFAASSALAC*											MRFPSIFTAVLFAASSALAASKKKKKASGVSKGEEDNMAIIKEFMRFKVHMEGSVNG	ATGAGATTTCCTTCAATTTTTACTGCTGTTTTATTCGCAGCATCCTCCGCATTAGCCTGCTAGC----------ATGGTTCAAGAGTTCGCAAGCGGTGTGAGCAAGGGCGAGGAGGATAACATGGCCATCATCAAGGAGTTCATGCGCTTCAAGGTGCACATGGAGGGCTCCGTGAACGGC	ATGAGATTTCCTTCAATTTTTACTGCTGTTTTATTCGCAGCATCCTCCGCATTAGCTGCTAGCAAAAAAAAAAAAAAAGCAAGCGGTGTGAGCAAGGGCGAGGAGGATAACATGGCCATCATCAAGGAGTTCATGCGCTTCAAGGTGCACATGGAGGGCTCCGTGAACGGC
ATGAGATTTCCTTCAATTTTTACTGCTGTTTTATTCGCAGCATCCTCCGCATTAGCcTGCTAGCGGTACTCATCACGATGCAAGCGGTGTGAGCAAGGGCGAGGAGGATAACATGGCCATCATCAAGGAGTTCATGCGCTTCAAGGTGCACATGGAGGGCTCCGTGAACGGC	1	36	Insertion	0	1		21	MRFPSIFTAVLFAASSALAC*											MRFPSIFTAVLFAASSALAASKKKKKASGVSKGEEDNMAIIKEFMRFKVHMEGSVNG	ATGAGATTTCCTTCAATTTTTACTGCTGTTTTATTCGCAGCATCCTCCGCATTAGCCTGCTAGCGGTACTCATCACGATGCAAGCGGTGTGAGCAAGGGCGAGGAGGATAACATGGCCATCATCAAGGAGTTCATGCGCTTCAAGGTGCACATGGAGGGCTCCGTGAACGGC	ATGAGATTTCCTTCAATTTTTACTGCTGTTTTATTCGCAGCATCCTCCGCATTAGCTGCTAGCAAAAAAAAAAAAAAAGCAAGCGGTGTGAGCAAGGGCGAGGAGGATAACATGGCCATCATCAAGGAGTTCATGCGCTTCAAGGTGCACATGGAGGGCTCCGTGAACGGC
ATGAGATTTCCTTCAATTTTTACTGCTGTTTTATTCGCAGCATCCTCCGCATTAGCcTGCTAGCTgcgtctcagcgttt--------------GCAAGCGGTGTGAGCAAGGGCGAGGAGGATAACATGGCCATCATCAAGGAGTTCATGCGCTTCAAGGTGCACATGGAGGGCTCCGTGAACGGC	1	34	Insertion and Deletion	0	1		21	MRFPSIFTAVLFAASSALAC*											MRFPSIFTAVLFAASSALAASKKKKKASGVSKGEEDNMAIIKEFMRFKVHMEGSVNG	ATGAGATTTCCTTCAATTTTTACTGCTGTTTTATTCGCAGCATCCTCCGCATTAGCCTGCTAGCTGCGTCTCAGCGTTT--------------GCAAGCGGTGTGAGCAAGGGCGAGGAGGATAACATGGCCATCATCAAGGAGTTCATGCGCTTCAAGGTGCACATGGAGGGCTCCGTGAACGGC	ATGAGATTTCCTTCAATTTTTACTGCTGTTTTATTCGCAGCATCCTCCGCATTAGCTGCTAGCAAAAAAAAAAAAAAAGCAAGCGGTGTGAGCAAGGGCGAGGAGGATAACATGGCCATCATCAAGGAGTTCATGCGCTTCAAGGTGCACATGGAGGGCTCCGTGAACGGC
ATGAGATTTCCTTCAATTTTTACTGCTGTTTTATTCGCAGCATCCTCCGCATTAGCTGC----------------------------GTGAGCAAGGGCGAGGAGGATAACATGGCCATCATCAAGGAGTTCATGCGCTTCAAGGTGCACATGGAGGGCTCCGTGAACGGC	1	35	Deletion	0	-28		21	MRFPSIFTAVLFAASSALAA*											MRFPSIFTAVLFAASSALAASKKKKKASGVSKGEEDNMAIIKEFMRFKVHMEGSVNG	ATGAGATTTCCTTCAATTTTTACTGCTGTTTTATTCGCAGCATCCTCCGCATTAGCTGC----------------------------GTGAGCAAGGGCGAGGAGGATAACATGGCCATCATCAAGGAGTTCATGCGCTTCAAGGTGCACATGGAGGGCTCCGTGAACGGC	ATGAGATTTCCTTCAATTTTTACTGCTGTTTTATTCGCAGCATCCTCCGCATTAGCTGCTAGCAAAAAAAAAAAAAAAGCAAGCGGTGTGAGCAAGGGCGAGGAGGATAACATGGCCATCATCAAGGAGTTCATGCGCTTCAAGGTGCACATGGAGGGCTCCGTGAACGGC
ATGAGATTTCCTTCAATTTTTACTGCTGTTTTATTCGCAGCATCCTCCGCATTAGCTGCcTAGC---------------GGatctgtcggtatggcAAGCGGTGTGAGCAAGGGCGAGGAGGATAACATGGCCATCATCAAGGAGTTCATGCGCTTCAAGGTGCACATGGAGGGCTCCGTGAACGGC	1	23	Insertion and Deletion	0	1		21	MRFPSIFTAVLFAASSALAA*											MRFPSIFTAVLFAASSALAASKKKKKASGVSKGEEDNMAIIKEFMRFKVHMEGSVNG	ATGAGATTTCCTTCAATTTTTACTGCTGTTTTATTCGCAGCATCCTCCGCATTAGCTGCCTAGC---------------GGATCTGTCGGTATGGCAAGCGGTGTGAGCAAGGGCGAGGAGGATAACATGGCCATCATCAAGGAGTTCATGCGCTTCAAGGTGCACATGGAGGGCTCCGTGAACGGC	ATGAGATTTCCTTCAATTTTTACTGCTGTTTTATTCGCAGCATCCTCCGCATTAGCTGCTAGCAAAAAAAAAAAAAAAGCAAGCGGTGTGAGCAAGGGCGAGGAGGATAACATGGCCATCATCAAGGAGTTCATGCGCTTCAAGGTGCACATGGAGGGCTCCGTGAACGGC
ATGAGATTTCCTTCAATTTTTACTGCTGTTTTATTCGCAGCATCCTCCGCATTAGCTGCcTAGC--------------ATtgtctcctcgattgCAAGCGGTGTGAGCAAGGGCGAGGAGGATAACATGGCCATCATCAAGGAGTTCATGCGCTTCAAGGTGCACATGGAGGGCTCCGTGAACGGC	1	36	Insertion and Deletion	0	1		21	MRFPSIFTAVLFAASSALAA*											MRFPSIFTAVLFAASSALAASKKKKKASGVSKGEEDNMAIIKEFMRFKVHMEGSVNG	ATGAGATTTCCTTCAATTTTTACTGCTGTTTTATTCGCAGCATCCTCCGCATTAGCTGCCTAGC--------------ATTGTCTCCTCGATTGCAAGCGGTGTGAGCAAGGGCGAGGAGGATAACATGGCCATCATCAAGGAGTTCATGCGCTTCAAGGTGCACATGGAGGGCTCCGTGAACGGC	ATGAGATTTCCTTCAATTTTTACTGCTGTTTTATTCGCAGCATCCTCCGCATTAGCTGCTAGCAAAAAAAAAAAAAAAGCAAGCGGTGTGAGCAAGGGCGAGGAGGATAACATGGCCATCATCAAGGAGTTCATGCGCTTCAAGGTGCACATGGAGGGCTCCGTGAACGGC
ATGAGATTTCCTTCAATTTTTACTGCTGTTTTATTCGCAGCATCCTCCGCATTAGCTGCcTAGC-----------CAACtccatctctcaGCAAGCGGTGTGAGCAAGGGCGAGGAGGATAACATGGCCATCATCAAGGAGTTCATGCGCTTCAAGGTGCACATGGAGGGCTCCGTGAACGGC	1	35	Insertion and Deletion	0	1		21	MRFPSIFTAVLFAASSALAA*											MRFPSIFTAVLFAASSALAASKKKKKASGVSKGEEDNMAIIKEFMRFKVHMEGSVNG	ATGAGATTTCCTTCAATTTTTACTGCTGTTTTATTCGCAGCATCCTCCGCATTAGCTGCCTAGC-----------CAACTCCATCTCTCAGCAAGCGGTGTGAGCAAGGGCGAGGAGGATAACATGGCCATCATCAAGGAGTTCATGCGCTTCAAGGTGCACATGGAGGGCTCCGTGAACGGC	ATGAGATTTCCTTCAATTTTTACTGCTGTTTTATTCGCAGCATCCTCCGCATTAGCTGCTAGCAAAAAAAAAAAAAAAGCAAGCGGTGTGAGCAAGGGCGAGGAGGATAACATGGCCATCATCAAGGAGTTCATGCGCTTCAAGGTGCACATGGAGGGCTCCGTGAACGGC
ATGAGATTTCCTTCAATTTTTACTGCTGTTTTATTCGCAGCATCCTCCGCATTAGCTGCcTAGC---------GGAAAATtgctggttgCAAGCGGTGTGAGCAAGGGCGAGGAGGGTAACATGGCCATCATCAAGGAGTTCATGCGCTTCAAGGTGCACATGGAGGGCTCCGTGAACGGC	1	24	Insertion and Deletion	0	1		21	MRFPSIFTAVLFAASSALAA*											MRFPSIFTAVLFAASSALAASKKKKKASGVSKGEEDNMAIIKEFMRFKVHMEGSVNG	ATGAGATTTCCTTCAATTTTTACTGCTGTTTTATTCGCAGCATCCTCCGCATTAGCTGCCTAGC---------GGAAAATTGCTGGTTGCAAGCGGTGTGAGCAAGGGCGAGGAGGGTAACATGGCCATCATCAAGGAGTTCATGCGCTTCAAGGTGCACATGGAGGGCTCCGTGAACGGC	ATGAGATTTCCTTCAATTTTTACTGCTGTTTTATTCGCAGCATCCTCCGCATTAGCTGCTAGCAAAAAAAAAAAAAAAGCAAGCGGTGTGAGCAAGGGCGAGGAGGATAACATGGCCATCATCAAGGAGTTCATGCGCTTCAAGGTGCACATGGAGGGCTCCGTGAACGGC
ATGAGATTTCCTTCAATTTTTACTGCTGTTTTATTCGCAGCATCCTCCGCATTAGCTGCcTAGCAAAATTAAATCGTCTGCAAGCGGTGTGAGCAAGGGCGAGGAGGATAACATGGCCATCATCAAGGAGTTCATGCGCTTCAAGGTGCACATGGAGGGCTCCGTGAACGGC	1	22	Insertion	0	1		21	MRFPSIFTAVLFAASSALAA*											MRFPSIFTAVLFAASSALAASKKKKKASGVSKGEEDNMAIIKEFMRFKVHMEGSVNG	ATGAGATTTCCTTCAATTTTTACTGCTGTTTTATTCGCAGCATCCTCCGCATTAGCTGCCTAGCAAAATTAAATCGTCTGCAAGCGGTGTGAGCAAGGGCGAGGAGGATAACATGGCCATCATCAAGGAGTTCATGCGCTTCAAGGTGCACATGGAGGGCTCCGTGAACGGC	ATGAGATTTCCTTCAATTTTTACTGCTGTTTTATTCGCAGCATCCTCCGCATTAGCTGCTAGCAAAAAAAAAAAAAAAGCAAGCGGTGTGAGCAAGGGCGAGGAGGATAACATGGCCATCATCAAGGAGTTCATGCGCTTCAAGGTGCACATGGAGGGCTCCGTGAACGGC
ATGAGATTTCCTTCAATTTTTACTGCTGTTTTATTCGCAGCATCCTCCGCATTAGCTGCcTAGCACCATACAGTCAGTCGCAAGCGGTGTGAGCAAGGGCGAGGAGGATAACATGGCCATCATCAAGGAGTTCATGCGCTTCAAGGTGCACATGGAGGGCTCCGTGAACGGC	1	35	Insertion	0	1		21	MRFPSIFTAVLFAASSALAA*											MRFPSIFTAVLFAASSALAASKKKKKASGVSKGEEDNMAIIKEFMRFKVHMEGSVNG	ATGAGATTTCCTTCAATTTTTACTGCTGTTTTATTCGCAGCATCCTCCGCATTAGCTGCCTAGCACCATACAGTCAGTCGCAAGCGGTGTGAGCAAGGGCGAGGAGGATAACATGGCCATCATCAAGGAGTTCATGCGCTTCAAGGTGCACATGGAGGGCTCCGTGAACGGC	ATGAGATTTCCTTCAATTTTTACTGCTGTTTTATTCGCAGCATCCTCCGCATTAGCTGCTAGCAAAAAAAAAAAAAAAGCAAGCGGTGTGAGCAAGGGCGAGGAGGATAACATGGCCATCATCAAGGAGTTCATGCGCTTCAAGGTGCACATGGAGGGCTCCGTGAACGGC
ATGAGATTTCCTTCAATTTTTACTGCTGTTTTATTCGCAGCATCCTCCGCATTAGCTGCcTAGCATAATGAAAAGACCTGCAAGCGGTGTGAGCAAGGGCGAGGAGGATAACATGGCCATCATCAAGGAGTTCATGCGCTTCAAGGTGCACATGGAGGGCTCCGTGAACGGC	1	32	Insertion	0	1		21	MRFPSIFTAVLFAASSALAA*											MRFPSIFTAVLFAASSALAASKKKKKASGVSKGEEDNMAIIKEFMRFKVHMEGSVNG	ATGAGATTTCCTTCAATTTTTACTGCTGTTTTATTCGCAGCATCCTCCGCATTAGCTGCCTAGCATAATGAAAAGACCTGCAAGCGGTGTGAGCAAGGGCGAGGAGGATAACATGGCCATCATCAAGGAGTTCATGCGCTTCAAGGTGCACATGGAGGGCTCCGTGAACGGC	ATGAGATTTCCTTCAATTTTTACTGCTGTTTTATTCGCAGCATCCTCCGCATTAGCTGCTAGCAAAAAAAAAAAAAAAGCAAGCGGTGTGAGCAAGGGCGAGGAGGATAACATGGCCATCATCAAGGAGTTCATGCGCTTCAAGGTGCACATGGAGGGCTCCGTGAACGGC
ATGAGATTTCCTTCAATTTTTACTGCTGTTTTATTCGCAGCATCCTCCGCATTAGCTGCcTAGCCAAAAAGGATCCCATGCAAGCGGTGTGAGCAAGGGCGAGGAGGATAACATGGCCATCATCAAGGAGTTCATGCGCTTCAAGGTGCACATGGAGGGCTCCGTGAACGGC	1	34	Insertion	0	1		21	MRFPSIFTAVLFAASSALAA*											MRFPSIFTAVLFAASSALAASKKKKKASGVSKGEEDNMAIIKEFMRFKVHMEGSVNG	ATGAGATTTCCTTCAATTTTTACTGCTGTTTTATTCGCAGCATCCTCCGCATTAGCTGCCTAGCCAAAAAGGATCCCATGCAAGCGGTGTGAGCAAGGGCGAGGAGGATAACATGGCCATCATCAAGGAGTTCATGCGCTTCAAGGTGCACATGGAGGGCTCCGTGAACGGC	ATGAGATTTCCTTCAATTTTTACTGCTGTTTTATTCGCAGCATCCTCCGCATTAGCTGCTAGCAAAAAAAAAAAAAAAGCAAGCGGTGTGAGCAAGGGCGAGGAGGATAACATGGCCATCATCAAGGAGTTCATGCGCTTCAAGGTGCACATGGAGGGCTCCGTGAACGGC
ATGAGATTTCCTTCAATTTTTACTGCTGTTTTATTCGCAGCATCCTCCGCATTAGCTGCcTAGCcccatcccaacgtgcc---------------GCAAGCGGTGTGAGCAAGGGCGAGGAGGATAACATGGCCATCATCAAGGAGTTCATGCGCTTCAAGGTGCACATGGAGGGCTCCGTGAACGGC	1	35	Insertion and Deletion	0	2		21	MRFPSIFTAVLFAASSALAA*											MRFPSIFTAVLFAASSALAASKKKKKASGVSKGEEDNMAIIKEFMRFKVHMEGSVNG	ATGAGATTTCCTTCAATTTTTACTGCTGTTTTATTCGCAGCATCCTCCGCATTAGCTGCCTAGCCCCATCCCAACGTGCC---------------GCAAGCGGTGTGAGCAAGGGCGAGGAGGATAACATGGCCATCATCAAGGAGTTCATGCGCTTCAAGGTGCACATGGAGGGCTCCGTGAACGGC	ATGAGATTTCCTTCAATTTTTACTGCTGTTTTATTCGCAGCATCCTCCGCATTAGCTGCTAGCAAAAAAAAAAAAAAAGCAAGCGGTGTGAGCAAGGGCGAGGAGGATAACATGGCCATCATCAAGGAGTTCATGCGCTTCAAGGTGCACATGGAGGGCTCCGTGAACGGC
ATGAGATTTCCTTCAATTTTTACTGCTGTTTTATTCGCAGCATCCTCCGCATTAGCTGCcTAGcgggtgatgagagggC---------------GCAAGCGGTGTGAGCAAGGGCGAGGAGGATAACATGGCCATCATCAAGGAGTTCATGCGCTTCAAGGTGCACATGGAGGGCTCCGTGAACGGC	1	30	Insertion and Deletion	0	1		21	MRFPSIFTAVLFAASSALAA*											MRFPSIFTAVLFAASSALAASKKKKKASGVSKGEEDNMAIIKEFMRFKVHMEGSVNG	ATGAGATTTCCTTCAATTTTTACTGCTGTTTTATTCGCAGCATCCTCCGCATTAGCTGCCTAGCGGGTGATGAGAGGGC---------------GCAAGCGGTGTGAGCAAGGGCGAGGAGGATAACATGGCCATCATCAAGGAGTTCATGCGCTTCAAGGTGCACATGGAGGGCTCCGTGAACGGC	ATGAGATTTCCTTCAATTTTTACTGCTGTTTTATTCGCAGCATCCTCCGCATTAGCTGCTAGCAAAAAAAAAAAAAAAGCAAGCGGTGTGAGCAAGGGCGAGGAGGATAACATGGCCATCATCAAGGAGTTCATGCGCTTCAAGGTGCACATGGAGGGCTCCGTGAACGGC
ATGAGATTTCCTTCAATTTTTACTGCTGTTTTATTCGCAGCATCCTCCGCATTAGCTGCcTAGCTATATAACTCACCTCGCAAGCGGTGTGAGCAAGGGCGAGGAGGATAACATGGCCATCATCAAGGAGTTCATGCGCTTCAAGGTGCACATGGAGGGCTCCGTGAACGGC	1	35	Insertion	0	1		21	MRFPSIFTAVLFAASSALAA*											MRFPSIFTAVLFAASSALAASKKKKKASGVSKGEEDNMAIIKEFMRFKVHMEGSVNG	ATGAGATTTCCTTCAATTTTTACTGCTGTTTTATTCGCAGCATCCTCCGCATTAGCTGCCTAGCTATATAACTCACCTCGCAAGCGGTGTGAGCAAGGGCGAGGAGGATAACATGGCCATCATCAAGGAGTTCATGCGCTTCAAGGTGCACATGGAGGGCTCCGTGAACGGC	ATGAGATTTCCTTCAATTTTTACTGCTGTTTTATTCGCAGCATCCTCCGCATTAGCTGCTAGCAAAAAAAAAAAAAAAGCAAGCGGTGTGAGCAAGGGCGAGGAGGATAACATGGCCATCATCAAGGAGTTCATGCGCTTCAAGGTGCACATGGAGGGCTCCGTGAACGGC
ATGAGATTTCCTTCAATTTTTACTGCTGTTTTATTCGCAGCATCCTCCGCATTAGCTGCcTAGCTCATATGGATTAAGAGCAAGCGGTGTGAGCAAGGGCGAGGAGGATAACATGGCCATCATCAAGGAGTTCATGCGCTTCAAGGTGCACATGGAGGGCTCCGTGAACGGC	1	36	Insertion	0	1		21	MRFPSIFTAVLFAASSALAA*											MRFPSIFTAVLFAASSALAASKKKKKASGVSKGEEDNMAIIKEFMRFKVHMEGSVNG	ATGAGATTTCCTTCAATTTTTACTGCTGTTTTATTCGCAGCATCCTCCGCATTAGCTGCCTAGCTCATATGGATTAAGAGCAAGCGGTGTGAGCAAGGGCGAGGAGGATAACATGGCCATCATCAAGGAGTTCATGCGCTTCAAGGTGCACATGGAGGGCTCCGTGAACGGC	ATGAGATTTCCTTCAATTTTTACTGCTGTTTTATTCGCAGCATCCTCCGCATTAGCTGCTAGCAAAAAAAAAAAAAAAGCAAGCGGTGTGAGCAAGGGCGAGGAGGATAACATGGCCATCATCAAGGAGTTCATGCGCTTCAAGGTGCACATGGAGGGCTCCGTGAACGGC
ATGAGATTTCCTTCAATTTTTACTGCTGTTTTATTCGCAGCATCCTCCGCATTAGCTGCcTAGCtcccacacaccccc--------------AGCAAGCGGTGTGAGCAAGGGCGAGGAGGATAACATGGCCATCATCAAGGAGTTCATGCGCTTCAAGGTGCACATGGAGGGCTCCGTGAACGGC	1	35	Insertion and Deletion	0	1		21	MRFPSIFTAVLFAASSALAA*											MRFPSIFTAVLFAASSALAASKKKKKASGVSKGEEDNMAIIKEFMRFKVHMEGSVNG	ATGAGATTTCCTTCAATTTTTACTGCTGTTTTATTCGCAGCATCCTCCGCATTAGCTGCCTAGCTCCCACACACCCCC--------------AGCAAGCGGTGTGAGCAAGGGCGAGGAGGATAACATGGCCATCATCAAGGAGTTCATGCGCTTCAAGGTGCACATGGAGGGCTCCGTGAACGGC	ATGAGATTTCCTTCAATTTTTACTGCTGTTTTATTCGCAGCATCCTCCGCATTAGCTGCTAGCAAAAAAAAAAAAAAAGCAAGCGGTGTGAGCAAGGGCGAGGAGGATAACATGGCCATCATCAAGGAGTTCATGCGCTTCAAGGTGCACATGGAGGGCTCCGTGAACGGC
ATGAGATTTCCTTCAATTTTTACTGCTGTTTTATTCGCAGCATCCTCCGCATTAGCTGCTtAGC--------------ACgtcacggcgggttgCAAGCGGTGTGAGCAAGGGCGAGGAGGATAACATGGCCATCATCAAGGAGTTCATGCGCTTCAAGGTGCACATGGAGGGCTCCGTGAACGGC	1	28	Insertion and Deletion	0	1		21	MRFPSIFTAVLFAASSALAA*											MRFPSIFTAVLFAASSALAASKKKKKASGVSKGEEDNMAIIKEFMRFKVHMEGSVNG	ATGAGATTTCCTTCAATTTTTACTGCTGTTTTATTCGCAGCATCCTCCGCATTAGCTGCTTAGC--------------ACGTCACGGCGGGTTGCAAGCGGTGTGAGCAAGGGCGAGGAGGATAACATGGCCATCATCAAGGAGTTCATGCGCTTCAAGGTGCACATGGAGGGCTCCGTGAACGGC	ATGAGATTTCCTTCAATTTTTACTGCTGTTTTATTCGCAGCATCCTCCGCATTAGCTGCTAGCAAAAAAAAAAAAAAAGCAAGCGGTGTGAGCAAGGGCGAGGAGGATAACATGGCCATCATCAAGGAGTTCATGCGCTTCAAGGTGCACATGGAGGGCTCCGTGAACGGC
ATGAGATTTCCTTCAATTTTTACTGCTGTTTTATTCGCAGCATCCTCCGCATTAGCTGCTtAGC--------------AGtttccagctcttggCAAGCGGTGTGAGCAAGGGCGAGGAGGATAACATGGCCATCATCAAGGAGTTCATGCGCTTCAAGGTGCACATGGAGGGCTCCGTGAACGGC	1	36	Insertion and Deletion	0	1		21	MRFPSIFTAVLFAASSALAA*											MRFPSIFTAVLFAASSALAASKKKKKASGVSKGEEDNMAIIKEFMRFKVHMEGSVNG	ATGAGATTTCCTTCAATTTTTACTGCTGTTTTATTCGCAGCATCCTCCGCATTAGCTGCTTAGC--------------AGTTTCCAGCTCTTGGCAAGCGGTGTGAGCAAGGGCGAGGAGGATAACATGGCCATCATCAAGGAGTTCATGCGCTTCAAGGTGCACATGGAGGGCTCCGTGAACGGC	ATGAGATTTCCTTCAATTTTTACTGCTGTTTTATTCGCAGCATCCTCCGCATTAGCTGCTAGCAAAAAAAAAAAAAAAGCAAGCGGTGTGAGCAAGGGCGAGGAGGATAACATGGCCATCATCAAGGAGTTCATGCGCTTCAAGGTGCACATGGAGGGCTCCGTGAACGGC
ATGAGATTTCCTTCAATTTTTACTGCTGTTTTATTCGCAGCATCCTCCGCATTAGCTGCTtAGC--------------ATggcggattctatggCAAGCGGTGTGAGCAAGGGCGAGGAGGATAACATGGCCATCATCAAGGAGTTCATGCGCTTCAAGGTGCACATGGAGGGCTCCGTGAACGGC	1	36	Insertion and Deletion	0	1		21	MRFPSIFTAVLFAASSALAA*											MRFPSIFTAVLFAASSALAASKKKKKASGVSKGEEDNMAIIKEFMRFKVHMEGSVNG	ATGAGATTTCCTTCAATTTTTACTGCTGTTTTATTCGCAGCATCCTCCGCATTAGCTGCTTAGC--------------ATGGCGGATTCTATGGCAAGCGGTGTGAGCAAGGGCGAGGAGGATAACATGGCCATCATCAAGGAGTTCATGCGCTTCAAGGTGCACATGGAGGGCTCCGTGAACGGC	ATGAGATTTCCTTCAATTTTTACTGCTGTTTTATTCGCAGCATCCTCCGCATTAGCTGCTAGCAAAAAAAAAAAAAAAGCAAGCGGTGTGAGCAAGGGCGAGGAGGATAACATGGCCATCATCAAGGAGTTCATGCGCTTCAAGGTGCACATGGAGGGCTCCGTGAACGGC
ATGAGATTTCCTTCAATTTTTACTGCTGTTTTATTCGCAGCATCCTCCGCATTAGCTGCTtAGC--------------ATtcgttcgggtatggCAAGCGGTGTGAGCAAGGGCGAGGAGGATAACATGGCCATCATCAAGGAGTTCATGCGCTTCAAGGTGCACATGGAGGGCTCCGTGAACGGC	1	34	Insertion and Deletion	0	1		21	MRFPSIFTAVLFAASSALAA*											MRFPSIFTAVLFAASSALAASKKKKKASGVSKGEEDNMAIIKEFMRFKVHMEGSVNG	ATGAGATTTCCTTCAATTTTTACTGCTGTTTTATTCGCAGCATCCTCCGCATTAGCTGCTTAGC--------------ATTCGTTCGGGTATGGCAAGCGGTGTGAGCAAGGGCGAGGAGGATAACATGGCCATCATCAAGGAGTTCATGCGCTTCAAGGTGCACATGGAGGGCTCCGTGAACGGC	ATGAGATTTCCTTCAATTTTTACTGCTGTTTTATTCGCAGCATCCTCCGCATTAGCTGCTAGCAAAAAAAAAAAAAAAGCAAGCGGTGTGAGCAAGGGCGAGGAGGATAACATGGCCATCATCAAGGAGTTCATGCGCTTCAAGGTGCACATGGAGGGCTCCGTGAACGGC
ATGAGATTTCCTTCAATTTTTACTGCTGTTTTATTCGCAGCATCCTCCGCATTAGCTGCTtAGC-------------AGgtactgtgattcaGCAAGCGGTGTGAGCAAGGGCGAGGAGGATAACATGGCCATCATCAAGGAGTTCATGCGCTTCAAGGTGCACATGGAGGGCTCCGTGAACGGC	1	35	Insertion and Deletion	0	1		21	MRFPSIFTAVLFAASSALAA*											MRFPSIFTAVLFAASSALAASKKKKKASGVSKGEEDNMAIIKEFMRFKVHMEGSVNG	ATGAGATTTCCTTCAATTTTTACTGCTGTTTTATTCGCAGCATCCTCCGCATTAGCTGCTTAGC-------------AGGTACTGTGATTCAGCAAGCGGTGTGAGCAAGGGCGAGGAGGATAACATGGCCATCATCAAGGAGTTCATGCGCTTCAAGGTGCACATGGAGGGCTCCGTGAACGGC	ATGAGATTTCCTTCAATTTTTACTGCTGTTTTATTCGCAGCATCCTCCGCATTAGCTGCTAGCAAAAAAAAAAAAAAAGCAAGCGGTGTGAGCAAGGGCGAGGAGGATAACATGGCCATCATCAAGGAGTTCATGCGCTTCAAGGTGCACATGGAGGGCTCCGTGAACGGC
ATGAGATTTCCTTCAATTTTTACTGCTGTTTTATTCGCAGCATCCTCCGCATTAGCTGCTtAGC-----------AATtgccccaACtgcgCAAGCGGTGTGAGCAAGGGCGAGGAGGATAACATGGCCATCATCAAGGAGTTCATGCGCTTCAAGGTGCACATGGAGGGCTCCGTGAACGGC	1	36	Insertion and Deletion	0	1		21	MRFPSIFTAVLFAASSALAA*											MRFPSIFTAVLFAASSALAASKKKKKASGVSKGEEDNMAIIKEFMRFKVHMEGSVNG	ATGAGATTTCCTTCAATTTTTACTGCTGTTTTATTCGCAGCATCCTCCGCATTAGCTGCTTAGC-----------AATTGCCCCAACTGCGCAAGCGGTGTGAGCAAGGGCGAGGAGGATAACATGGCCATCATCAAGGAGTTCATGCGCTTCAAGGTGCACATGGAGGGCTCCGTGAACGGC	ATGAGATTTCCTTCAATTTTTACTGCTGTTTTATTCGCAGCATCCTCCGCATTAGCTGCTAGCAAAAAAAAAAAAAAAGCAAGCGGTGTGAGCAAGGGCGAGGAGGATAACATGGCCATCATCAAGGAGTTCATGCGCTTCAAGGTGCACATGGAGGGCTCCGTGAACGGC
ATGAGATTTCCTTCAATTTTTACTGCTGTTTTATTCGCAGCATCCTCCGCATTAGCTGCTtAGC-----------CATgcctaACctcccgCAAGCGGTGTGAGCAAGGGCGAGGAGGATAACATGGCCATCATCAAGGAGTTCATGCGCTTCAAGGTGCACATGGAGGGCTCCGTGAACGGC	1	36	Insertion and Deletion	0	1		21	MRFPSIFTAVLFAASSALAA*											MRFPSIFTAVLFAASSALAASKKKKKASGVSKGEEDNMAIIKEFMRFKVHMEGSVNG	ATGAGATTTCCTTCAATTTTTACTGCTGTTTTATTCGCAGCATCCTCCGCATTAGCTGCTTAGC-----------CATGCCTAACCTCCCGCAAGCGGTGTGAGCAAGGGCGAGGAGGATAACATGGCCATCATCAAGGAGTTCATGCGCTTCAAGGTGCACATGGAGGGCTCCGTGAACGGC	ATGAGATTTCCTTCAATTTTTACTGCTGTTTTATTCGCAGCATCCTCCGCATTAGCTGCTAGCAAAAAAAAAAAAAAAGCAAGCGGTGTGAGCAAGGGCGAGGAGGATAACATGGCCATCATCAAGGAGTTCATGCGCTTCAAGGTGCACATGGAGGGCTCCGTGAACGGC
ATGAGATTTCCTTCAATTTTTACTGCTGTTTTATTCGCAGCATCCTCCGCATTAGCTGCTtAGC----------CAAGtgtgcctctaTGCAAGCGGTGTGAGCAAGGGCGAGGAGGATAACATGGCCATCATCAAGGAGTTCATGCGCTTCAAGGTGCACATGGAGGGCTCCGTGAACGGC	1	36	Insertion and Deletion	0	1		21	MRFPSIFTAVLFAASSALAA*											MRFPSIFTAVLFAASSALAASKKKKKASGVSKGEEDNMAIIKEFMRFKVHMEGSVNG	ATGAGATTTCCTTCAATTTTTACTGCTGTTTTATTCGCAGCATCCTCCGCATTAGCTGCTTAGC----------CAAGTGTGCCTCTATGCAAGCGGTGTGAGCAAGGGCGAGGAGGATAACATGGCCATCATCAAGGAGTTCATGCGCTTCAAGGTGCACATGGAGGGCTCCGTGAACGGC	ATGAGATTTCCTTCAATTTTTACTGCTGTTTTATTCGCAGCATCCTCCGCATTAGCTGCTAGCAAAAAAAAAAAAAAAGCAAGCGGTGTGAGCAAGGGCGAGGAGGATAACATGGCCATCATCAAGGAGTTCATGCGCTTCAAGGTGCACATGGAGGGCTCCGTGAACGGC
ATGAGATTTCCTTCAATTTTTACTGCTGTTTTATTCGCAGCATCCTCCGCATTAGCTGCTtAGC---------CATAAATttcagcctgCAAGCGGTGTGAGCAAGGGCGAGGAGGATAACATGGCCATCATCAAGGAGTTCATGCGCTTCAAGGTGCACATGGAGGGCTCCGTGAACGGC	1	36	Insertion and Deletion	0	1		21	MRFPSIFTAVLFAASSALAA*											MRFPSIFTAVLFAASSALAASKKKKKASGVSKGEEDNMAIIKEFMRFKVHMEGSVNG	ATGAGATTTCCTTCAATTTTTACTGCTGTTTTATTCGCAGCATCCTCCGCATTAGCTGCTTAGC---------CATAAATTTCAGCCTGCAAGCGGTGTGAGCAAGGGCGAGGAGGATAACATGGCCATCATCAAGGAGTTCATGCGCTTCAAGGTGCACATGGAGGGCTCCGTGAACGGC	ATGAGATTTCCTTCAATTTTTACTGCTGTTTTATTCGCAGCATCCTCCGCATTAGCTGCTAGCAAAAAAAAAAAAAAAGCAAGCGGTGTGAGCAAGGGCGAGGAGGATAACATGGCCATCATCAAGGAGTTCATGCGCTTCAAGGTGCACATGGAGGGCTCCGTGAACGGC
ATGAGATTTCCTTCAATTTTTACTGCTGTTTTATTCGCAGCATCCTCCGCATTAGCTGCTtAGC---------CGAACccttggcgaGGCAAGCGGTGTGAGCAAGGGCGAGGAGGATAACATGGCCATCATCAAGGAGTTCATGCGCTTCAAGGTGCACATGGAGGGCTCCGTGAACGGC	1	36	Insertion and Deletion	0	1		21	MRFPSIFTAVLFAASSALAA*											MRFPSIFTAVLFAASSALAASKKKKKASGVSKGEEDNMAIIKEFMRFKVHMEGSVNG	ATGAGATTTCCTTCAATTTTTACTGCTGTTTTATTCGCAGCATCCTCCGCATTAGCTGCTTAGC---------CGAACCCTTGGCGAGGCAAGCGGTGTGAGCAAGGGCGAGGAGGATAACATGGCCATCATCAAGGAGTTCATGCGCTTCAAGGTGCACATGGAGGGCTCCGTGAACGGC	ATGAGATTTCCTTCAATTTTTACTGCTGTTTTATTCGCAGCATCCTCCGCATTAGCTGCTAGCAAAAAAAAAAAAAAAGCAAGCGGTGTGAGCAAGGGCGAGGAGGATAACATGGCCATCATCAAGGAGTTCATGCGCTTCAAGGTGCACATGGAGGGCTCCGTGAACGGC
ATGAGATTTCCTTCAATTTTTACTGCTGTTTTATTCGCAGCATCCTCCGCATTAGCTGCTtAGC---------CGAATcctaccgcaCGCAAGCGGTGTGAGCAAGGGCGAGGAGGATAACATGGCCATCATCAAGGAGTTCATGCGCTTCAAGGTGCACATGGAGGGCTCCGTGAACGGC	1	36	Insertion and Deletion	0	1		21	MRFPSIFTAVLFAASSALAA*											MRFPSIFTAVLFAASSALAASKKKKKASGVSKGEEDNMAIIKEFMRFKVHMEGSVNG	ATGAGATTTCCTTCAATTTTTACTGCTGTTTTATTCGCAGCATCCTCCGCATTAGCTGCTTAGC---------CGAATCCTACCGCACGCAAGCGGTGTGAGCAAGGGCGAGGAGGATAACATGGCCATCATCAAGGAGTTCATGCGCTTCAAGGTGCACATGGAGGGCTCCGTGAACGGC	ATGAGATTTCCTTCAATTTTTACTGCTGTTTTATTCGCAGCATCCTCCGCATTAGCTGCTAGCAAAAAAAAAAAAAAAGCAAGCGGTGTGAGCAAGGGCGAGGAGGATAACATGGCCATCATCAAGGAGTTCATGCGCTTCAAGGTGCACATGGAGGGCTCCGTGAACGGC
ATGAGATTTCCTTCAATTTTTACTGCTGTTTTATTCGCAGCATCCTCCGCATTAGCTGCTtAGC---------GAGcgtctctgaATAGCAAGCGGTGTGAGCAAGGGCGAGGAGGATAACATGGCCATCATCAAGGAGTTCATGCGCTTCAAGGTGCACATGGAGGGCTCCGTGAACGGC	1	32	Insertion and Deletion	0	1		21	MRFPSIFTAVLFAASSALAA*											MRFPSIFTAVLFAASSALAASKKKKKASGVSKGEEDNMAIIKEFMRFKVHMEGSVNG	ATGAGATTTCCTTCAATTTTTACTGCTGTTTTATTCGCAGCATCCTCCGCATTAGCTGCTTAGC---------GAGCGTCTCTGAATAGCAAGCGGTGTGAGCAAGGGCGAGGAGGATAACATGGCCATCATCAAGGAGTTCATGCGCTTCAAGGTGCACATGGAGGGCTCCGTGAACGGC	ATGAGATTTCCTTCAATTTTTACTGCTGTTTTATTCGCAGCATCCTCCGCATTAGCTGCTAGCAAAAAAAAAAAAAAAGCAAGCGGTGTGAGCAAGGGCGAGGAGGATAACATGGCCATCATCAAGGAGTTCATGCGCTTCAAGGTGCACATGGAGGGCTCCGTGAACGGC
ATGAGATTTCCTTCAATTTTTACTGCTGTTTTATTCGCAGCATCCTCCGCATTAGCTGCTtAGCAAGACTAAGGGGAGCGCAAGCGGTGTGAGCAAGGGCGAGGAGGATAACATGGCCATCATCAAGGAGTTCATGCGCTTCAAGGTGCACATGGAGGGCTCCGTGAACGGC	1	36	Insertion	0	1		21	MRFPSIFTAVLFAASSALAA*											MRFPSIFTAVLFAASSALAASKKKKKASGVSKGEEDNMAIIKEFMRFKVHMEGSVNG	ATGAGATTTCCTTCAATTTTTACTGCTGTTTTATTCGCAGCATCCTCCGCATTAGCTGCTTAGCAAGACTAAGGGGAGCGCAAGCGGTGTGAGCAAGGGCGAGGAGGATAACATGGCCATCATCAAGGAGTTCATGCGCTTCAAGGTGCACATGGAGGGCTCCGTGAACGGC	ATGAGATTTCCTTCAATTTTTACTGCTGTTTTATTCGCAGCATCCTCCGCATTAGCTGCTAGCAAAAAAAAAAAAAAAGCAAGCGGTGTGAGCAAGGGCGAGGAGGATAACATGGCCATCATCAAGGAGTTCATGCGCTTCAAGGTGCACATGGAGGGCTCCGTGAACGGC
ATGAGATTTCCTTCAATTTTTACTGCTGTTTTATTCGCAGCATCCTCCGCATTAGCTGCTtAGCACATATCACGGCTATGCAAGCGGTGTGAGCAAGGGCGAGGAGGATAACATGGCCATCATCAAGGAGTTCATGCGCTTCAAGGTGCACATGGAGGGCTCCGTGAACGGC	1	35	Insertion	0	1		21	MRFPSIFTAVLFAASSALAA*											MRFPSIFTAVLFAASSALAASKKKKKASGVSKGEEDNMAIIKEFMRFKVHMEGSVNG	ATGAGATTTCCTTCAATTTTTACTGCTGTTTTATTCGCAGCATCCTCCGCATTAGCTGCTTAGCACATATCACGGCTATGCAAGCGGTGTGAGCAAGGGCGAGGAGGATAACATGGCCATCATCAAGGAGTTCATGCGCTTCAAGGTGCACATGGAGGGCTCCGTGAACGGC	ATGAGATTTCCTTCAATTTTTACTGCTGTTTTATTCGCAGCATCCTCCGCATTAGCTGCTAGCAAAAAAAAAAAAAAAGCAAGCGGTGTGAGCAAGGGCGAGGAGGATAACATGGCCATCATCAAGGAGTTCATGCGCTTCAAGGTGCACATGGAGGGCTCCGTGAACGGC
ATGAGATTTCCTTCAATTTTTACTGCTGTTTTATTCGCAGCATCCTCCGCATTAGCTGCTtAGCAGGATTAACTCTTAGGCAAGCGGTGTGAGCAAGGGCGAGGAGGATAACATGGCCATCATCAAGGAGTTCATGCGCTTCAAGGTGCACATGGAGGGCTCCGTGAACGGC	1	36	Insertion	0	1		21	MRFPSIFTAVLFAASSALAA*											MRFPSIFTAVLFAASSALAASKKKKKASGVSKGEEDNMAIIKEFMRFKVHMEGSVNG	ATGAGATTTCCTTCAATTTTTACTGCTGTTTTATTCGCAGCATCCTCCGCATTAGCTGCTTAGCAGGATTAACTCTTAGGCAAGCGGTGTGAGCAAGGGCGAGGAGGATAACATGGCCATCATCAAGGAGTTCATGCGCTTCAAGGTGCACATGGAGGGCTCCGTGAACGGC	ATGAGATTTCCTTCAATTTTTACTGCTGTTTTATTCGCAGCATCCTCCGCATTAGCTGCTAGCAAAAAAAAAAAAAAAGCAAGCGGTGTGAGCAAGGGCGAGGAGGATAACATGGCCATCATCAAGGAGTTCATGCGCTTCAAGGTGCACATGGAGGGCTCCGTGAACGGC
ATGAGATTTCCTTCAATTTTTACTGCTGTTTTATTCGCAGCATCCTCCGCATTAGCTGCTtAGCAGGCAATGGATGAAGGCAAGCGGTGTGAGCAAGGGCGAGGAGGATAACATGGCCATCATCAAGGAGTTCATGCGCTTCAAGGTGCACATGGAGGGCTCCGTGAACGGC	1	36	Insertion	0	1		21	MRFPSIFTAVLFAASSALAA*											MRFPSIFTAVLFAASSALAASKKKKKASGVSKGEEDNMAIIKEFMRFKVHMEGSVNG	ATGAGATTTCCTTCAATTTTTACTGCTGTTTTATTCGCAGCATCCTCCGCATTAGCTGCTTAGCAGGCAATGGATGAAGGCAAGCGGTGTGAGCAAGGGCGAGGAGGATAACATGGCCATCATCAAGGAGTTCATGCGCTTCAAGGTGCACATGGAGGGCTCCGTGAACGGC	ATGAGATTTCCTTCAATTTTTACTGCTGTTTTATTCGCAGCATCCTCCGCATTAGCTGCTAGCAAAAAAAAAAAAAAAGCAAGCGGTGTGAGCAAGGGCGAGGAGGATAACATGGCCATCATCAAGGAGTTCATGCGCTTCAAGGTGCACATGGAGGGCTCCGTGAACGGC
ATGAGATTTCCTTCAATTTTTACTGCTGTTTTATTCGCAGCATCCTCCGCATTAGCTGCTtAGCATTCTTCATATAGAAGCAAGCGGTGTGAGCAAGGGCGAGGAGGATAACATGGCCATCATCAAGGAGTTCATGCGCTTCAAGGTGCACATGGAGGGCTCCGTGAACGGC	1	35	Insertion	0	1		21	MRFPSIFTAVLFAASSALAA*											MRFPSIFTAVLFAASSALAASKKKKKASGVSKGEEDNMAIIKEFMRFKVHMEGSVNG	ATGAGATTTCCTTCAATTTTTACTGCTGTTTTATTCGCAGCATCCTCCGCATTAGCTGCTTAGCATTCTTCATATAGAAGCAAGCGGTGTGAGCAAGGGCGAGGAGGATAACATGGCCATCATCAAGGAGTTCATGCGCTTCAAGGTGCACATGGAGGGCTCCGTGAACGGC	ATGAGATTTCCTTCAATTTTTACTGCTGTTTTATTCGCAGCATCCTCCGCATTAGCTGCTAGCAAAAAAAAAAAAAAAGCAAGCGGTGTGAGCAAGGGCGAGGAGGATAACATGGCCATCATCAAGGAGTTCATGCGCTTCAAGGTGCACATGGAGGGCTCCGTGAACGGC
ATGAGATTTCCTTCAATTTTTACTGCTGTTTTATTCGCAGCATCCTCCGCATTAGCTGCTtAGCCAAAAATAGAAACGTGCAAGCGGTGTGAGCAAGGGCGAGGAGGATAACATGGCCATCATCAAGGAGTTCATGCGCTTCAAGGTGCACATGGAGGGCTCCGTGAACGGC	1	34	Insertion	0	1		21	MRFPSIFTAVLFAASSALAA*											MRFPSIFTAVLFAASSALAASKKKKKASGVSKGEEDNMAIIKEFMRFKVHMEGSVNG	ATGAGATTTCCTTCAATTTTTACTGCTGTTTTATTCGCAGCATCCTCCGCATTAGCTGCTTAGCCAAAAATAGAAACGTGCAAGCGGTGTGAGCAAGGGCGAGGAGGATAACATGGCCATCATCAAGGAGTTCATGCGCTTCAAGGTGCACATGGAGGGCTCCGTGAACGGC	ATGAGATTTCCTTCAATTTTTACTGCTGTTTTATTCGCAGCATCCTCCGCATTAGCTGCTAGCAAAAAAAAAAAAAAAGCAAGCGGTGTGAGCAAGGGCGAGGAGGATAACATGGCCATCATCAAGGAGTTCATGCGCTTCAAGGTGCACATGGAGGGCTCCGTGAACGGC
ATGAGATTTCCTTCAATTTTTACTGCTGTTTTATTCGCAGCATCCTCCGCATTAGCTGCTtAGCCAGGTAAGAACCGGGGCAAGCGGTGTGAGCAAGGGCGAGGAGGATAACATGGCCATCATCAAGGAGTTCATGCGCTTCAAGGTGCACATGGAGGGCTCCGTGAACGGC	1	38	Insertion	0	1		21	MRFPSIFTAVLFAASSALAA*											MRFPSIFTAVLFAASSALAASKKKKKASGVSKGEEDNMAIIKEFMRFKVHMEGSVNG	ATGAGATTTCCTTCAATTTTTACTGCTGTTTTATTCGCAGCATCCTCCGCATTAGCTGCTTAGCCAGGTAAGAACCGGGGCAAGCGGTGTGAGCAAGGGCGAGGAGGATAACATGGCCATCATCAAGGAGTTCATGCGCTTCAAGGTGCACATGGAGGGCTCCGTGAACGGC	ATGAGATTTCCTTCAATTTTTACTGCTGTTTTATTCGCAGCATCCTCCGCATTAGCTGCTAGCAAAAAAAAAAAAAAAGCAAGCGGTGTGAGCAAGGGCGAGGAGGATAACATGGCCATCATCAAGGAGTTCATGCGCTTCAAGGTGCACATGGAGGGCTCCGTGAACGGC
ATGAGATTTCCTTCAATTTTTACTGCTGTTTTATTCGCAGCATCCTCCGCATTAGCTGCTTagccattttgtaagaGC--------------CGCAAGCGGTGTGAGCAAGGGCGAGGAGGATAACATGGCCATCATCAAGGAGTTCATGCGCTTCAAGGTGCACATGGAGGGCTCCGTGAACGGC	1	37	Insertion and Deletion	0	1		21	MRFPSIFTAVLFAASSALAA*											MRFPSIFTAVLFAASSALAASKKKKKASGVSKGEEDNMAIIKEFMRFKVHMEGSVNG	ATGAGATTTCCTTCAATTTTTACTGCTGTTTTATTCGCAGCATCCTCCGCATTAGCTGCTTAGCCATTTTGTAAGAGC--------------CGCAAGCGGTGTGAGCAAGGGCGAGGAGGATAACATGGCCATCATCAAGGAGTTCATGCGCTTCAAGGTGCACATGGAGGGCTCCGTGAACGGC	ATGAGATTTCCTTCAATTTTTACTGCTGTTTTATTCGCAGCATCCTCCGCATTAGCTGCTAGCAAAAAAAAAAAAAAAGCAAGCGGTGTGAGCAAGGGCGAGGAGGATAACATGGCCATCATCAAGGAGTTCATGCGCTTCAAGGTGCACATGGAGGGCTCCGTGAACGGC
ATGAGATTTCCTTCAATTTTTACTGCTGTTTTATTCGCAGCATCCTCCGCATTAGCTGCTtagcccagtatttatTGC--------------AGCAAGCGGTGTGAGCAAGGGCGAGGAGGATAACATGGCCATCATCAAGGGGTTCATGCGCTTCAAGGTGCACATGGAGGGCTCCGTGAACGGC	1	30	Insertion and Deletion	0	1		21	MRFPSIFTAVLFAASSALAA*											MRFPSIFTAVLFAASSALAASKKKKKASGVSKGEEDNMAIIKEFMRFKVHMEGSVNG	ATGAGATTTCCTTCAATTTTTACTGCTGTTTTATTCGCAGCATCCTCCGCATTAGCTGCTTAGCCCAGTATTTATTGC--------------AGCAAGCGGTGTGAGCAAGGGCGAGGAGGATAACATGGCCATCATCAAGGGGTTCATGCGCTTCAAGGTGCACATGGAGGGCTCCGTGAACGGC	ATGAGATTTCCTTCAATTTTTACTGCTGTTTTATTCGCAGCATCCTCCGCATTAGCTGCTAGCAAAAAAAAAAAAAAAGCAAGCGGTGTGAGCAAGGGCGAGGAGGATAACATGGCCATCATCAAGGAGTTCATGCGCTTCAAGGTGCACATGGAGGGCTCCGTGAACGGC
ATGAGATTTCCTTCAATTTTTACTGCTGTTTTATTCGCAGCATCCTCCGCATTAGCTGCTtagccctgacggcgttgtAG----------------GCAAGCGGTGTGAGCAAGGGCGAGGAGGATAACATGGCCATCATCAAGGAGTTCATGCGCTTCAAGGTGCACATGGAGGGCTCCGTGAACGGC	1	35	Insertion and Deletion	0	2		21	MRFPSIFTAVLFAASSALAA*											MRFPSIFTAVLFAASSALAASKKKKKASGVSKGEEDNMAIIKEFMRFKVHMEGSVNG	ATGAGATTTCCTTCAATTTTTACTGCTGTTTTATTCGCAGCATCCTCCGCATTAGCTGCTTAGCCCTGACGGCGTTGTAG----------------GCAAGCGGTGTGAGCAAGGGCGAGGAGGATAACATGGCCATCATCAAGGAGTTCATGCGCTTCAAGGTGCACATGGAGGGCTCCGTGAACGGC	ATGAGATTTCCTTCAATTTTTACTGCTGTTTTATTCGCAGCATCCTCCGCATTAGCTGCTAGCAAAAAAAAAAAAAAAGCAAGCGGTGTGAGCAAGGGCGAGGAGGATAACATGGCCATCATCAAGGAGTTCATGCGCTTCAAGGTGCACATGGAGGGCTCCGTGAACGGC
ATGAGATTTCCTTCAATTTTTACTGCTGTTTTATTCGCAGCATCCTCCGCATTAGCTGCTtAGCCGAAAGACTCATAATGCAAGCGGTGTGAGCAAGGGCGAGGAGGATAACATGGCCATCATCAAGGAGTTCATGCGCTTCAAGGTGCACATGGAGGGCTCCGTGAACGGC	1	36	Insertion	0	1		21	MRFPSIFTAVLFAASSALAA*											MRFPSIFTAVLFAASSALAASKKKKKASGVSKGEEDNMAIIKEFMRFKVHMEGSVNG	ATGAGATTTCCTTCAATTTTTACTGCTGTTTTATTCGCAGCATCCTCCGCATTAGCTGCTTAGCCGAAAGACTCATAATGCAAGCGGTGTGAGCAAGGGCGAGGAGGATAACATGGCCATCATCAAGGAGTTCATGCGCTTCAAGGTGCACATGGAGGGCTCCGTGAACGGC	ATGAGATTTCCTTCAATTTTTACTGCTGTTTTATTCGCAGCATCCTCCGCATTAGCTGCTAGCAAAAAAAAAAAAAAAGCAAGCGGTGTGAGCAAGGGCGAGGAGGATAACATGGCCATCATCAAGGAGTTCATGCGCTTCAAGGTGCACATGGAGGGCTCCGTGAACGGC
ATGAGATTTCCTTCAATTTTTACTGCTGTTTTATTCGCAGCATCCTCCGCATTAGCTGCTtAGCCGACATACTATCCGTGCAAGCGGTGTGAGCAAGGGCGAGGAGGATAACATGGCCATCATCAAGGAGTTCATGCGCTTCAAGGTGCACATGGAGGGCTCCGTGAACGGC	1	36	Insertion	0	1		21	MRFPSIFTAVLFAASSALAA*											MRFPSIFTAVLFAASSALAASKKKKKASGVSKGEEDNMAIIKEFMRFKVHMEGSVNG	ATGAGATTTCCTTCAATTTTTACTGCTGTTTTATTCGCAGCATCCTCCGCATTAGCTGCTTAGCCGACATACTATCCGTGCAAGCGGTGTGAGCAAGGGCGAGGAGGATAACATGGCCATCATCAAGGAGTTCATGCGCTTCAAGGTGCACATGGAGGGCTCCGTGAACGGC	ATGAGATTTCCTTCAATTTTTACTGCTGTTTTATTCGCAGCATCCTCCGCATTAGCTGCTAGCAAAAAAAAAAAAAAAGCAAGCGGTGTGAGCAAGGGCGAGGAGGATAACATGGCCATCATCAAGGAGTTCATGCGCTTCAAGGTGCACATGGAGGGCTCCGTGAACGGC
ATGAGATTTCCTTCAATTTTTACTGCTGTTTTATTCGCAGCATCCTCCGCATTAGCTGCTtAGCCgctgtttttggtta--------------GCAAGCGGTGTGAGCAAGGGCGAGGAGGATAACATGGCCATCATCAAGGAGTTCATGCGCTTCAAGGTGCACATGGAGGGCTCCGTGAACGGC	1	36	Insertion and Deletion	0	1		21	MRFPSIFTAVLFAASSALAA*											MRFPSIFTAVLFAASSALAASKKKKKASGVSKGEEDNMAIIKEFMRFKVHMEGSVNG	ATGAGATTTCCTTCAATTTTTACTGCTGTTTTATTCGCAGCATCCTCCGCATTAGCTGCTTAGCCGCTGTTTTTGGTTA--------------GCAAGCGGTGTGAGCAAGGGCGAGGAGGATAACATGGCCATCATCAAGGAGTTCATGCGCTTCAAGGTGCACATGGAGGGCTCCGTGAACGGC	ATGAGATTTCCTTCAATTTTTACTGCTGTTTTATTCGCAGCATCCTCCGCATTAGCTGCTAGCAAAAAAAAAAAAAAAGCAAGCGGTGTGAGCAAGGGCGAGGAGGATAACATGGCCATCATCAAGGAGTTCATGCGCTTCAAGGTGCACATGGAGGGCTCCGTGAACGGC
ATGAGATTTCCTTCAATTTTTACTGCTGTTTTATTCGCAGCATCCTCCGCATTAGCTGCTtAGCCggtcccggccta------------TTGCAAGCGGTGTGAGCAAGGGCGAGGAGGATAACATGGCCATCATCAAGGAGTTCATGCGCTTCAAGGTGCACATGGAGGGCTCCGTGAACGGC	1	36	Insertion and Deletion	0	1		21	MRFPSIFTAVLFAASSALAA*											MRFPSIFTAVLFAASSALAASKKKKKASGVSKGEEDNMAIIKEFMRFKVHMEGSVNG	ATGAGATTTCCTTCAATTTTTACTGCTGTTTTATTCGCAGCATCCTCCGCATTAGCTGCTTAGCCGGTCCCGGCCTA------------TTGCAAGCGGTGTGAGCAAGGGCGAGGAGGATAACATGGCCATCATCAAGGAGTTCATGCGCTTCAAGGTGCACATGGAGGGCTCCGTGAACGGC	ATGAGATTTCCTTCAATTTTTACTGCTGTTTTATTCGCAGCATCCTCCGCATTAGCTGCTAGCAAAAAAAAAAAAAAAGCAAGCGGTGTGAGCAAGGGCGAGGAGGATAACATGGCCATCATCAAGGAGTTCATGCGCTTCAAGGTGCACATGGAGGGCTCCGTGAACGGC
ATGAGATTTCCTTCAATTTTTACTGCTGTTTTATTCGCAGCATCCTCCGCATTAGCTGCTtAGCCtaggcgaccacgta--------------GCAAGCGGTGTGAGCAAGGGCGAGGAGGATAACATGGCCATCATCAAGGAGTTCATGCGCTTCAAGGTGCACATGGAGGGCTCCGTGAACGGC	1	33	Insertion and Deletion	0	1		21	MRFPSIFTAVLFAASSALAA*											MRFPSIFTAVLFAASSALAASKKKKKASGVSKGEEDNMAIIKEFMRFKVHMEGSVNG	ATGAGATTTCCTTCAATTTTTACTGCTGTTTTATTCGCAGCATCCTCCGCATTAGCTGCTTAGCCTAGGCGACCACGTA--------------GCAAGCGGTGTGAGCAAGGGCGAGGAGGATAACATGGCCATCATCAAGGAGTTCATGCGCTTCAAGGTGCACATGGAGGGCTCCGTGAACGGC	ATGAGATTTCCTTCAATTTTTACTGCTGTTTTATTCGCAGCATCCTCCGCATTAGCTGCTAGCAAAAAAAAAAAAAAAGCAAGCGGTGTGAGCAAGGGCGAGGAGGATAACATGGCCATCATCAAGGAGTTCATGCGCTTCAAGGTGCACATGGAGGGCTCCGTGAACGGC
ATGAGATTTCCTTCAATTTTTACTGCTGTTTTATTCGCAGCATCCTCCGCATTAGCTGCTtAGCCTAGTAAGCCATTCAGCAAGCGGTGTGAGCAAGGGCGAGGAGGATAACATGGCCATCATCAAGGAGTTCATGCGCTTCAAGGTGCACATGGAGGGCTCCGTGAACGGC	1	33	Insertion	0	1		21	MRFPSIFTAVLFAASSALAA*											MRFPSIFTAVLFAASSALAASKKKKKASGVSKGEEDNMAIIKEFMRFKVHMEGSVNG	ATGAGATTTCCTTCAATTTTTACTGCTGTTTTATTCGCAGCATCCTCCGCATTAGCTGCTTAGCCTAGTAAGCCATTCAGCAAGCGGTGTGAGCAAGGGCGAGGAGGATAACATGGCCATCATCAAGGAGTTCATGCGCTTCAAGGTGCACATGGAGGGCTCCGTGAACGGC	ATGAGATTTCCTTCAATTTTTACTGCTGTTTTATTCGCAGCATCCTCCGCATTAGCTGCTAGCAAAAAAAAAAAAAAAGCAAGCGGTGTGAGCAAGGGCGAGGAGGATAACATGGCCATCATCAAGGAGTTCATGCGCTTCAAGGTGCACATGGAGGGCTCCGTGAACGGC
ATGAGATTTCCTTCAATTTTTACTGCTGTTTTATTCGCAGCATCCTCCGCATTAGCTGCTtAGCGATAATCTAGGCAAGGCAAGCGGTGTGAGCAAGGGCGAGGAGGATAACATGGCCATCATCAAGGAGTTCATGCGCTTCAAGGTGCACATGGAGGGCTCCGTGAACGGC	1	36	Insertion	0	1		21	MRFPSIFTAVLFAASSALAA*											MRFPSIFTAVLFAASSALAASKKKKKASGVSKGEEDNMAIIKEFMRFKVHMEGSVNG	ATGAGATTTCCTTCAATTTTTACTGCTGTTTTATTCGCAGCATCCTCCGCATTAGCTGCTTAGCGATAATCTAGGCAAGGCAAGCGGTGTGAGCAAGGGCGAGGAGGATAACATGGCCATCATCAAGGAGTTCATGCGCTTCAAGGTGCACATGGAGGGCTCCGTGAACGGC	ATGAGATTTCCTTCAATTTTTACTGCTGTTTTATTCGCAGCATCCTCCGCATTAGCTGCTAGCAAAAAAAAAAAAAAAGCAAGCGGTGTGAGCAAGGGCGAGGAGGATAACATGGCCATCATCAAGGAGTTCATGCGCTTCAAGGTGCACATGGAGGGCTCCGTGAACGGC
ATGAGATTTCCTTCAATTTTTACTGCTGTTTTATTCGCAGCATCCTCCGCATTAGCTGCTtAGCGATCACGATCTTGATGCAAGCGGTGTGAGCAAGGGCGAGGAGGATAACATGGCCATCATCAAGGAGTTCATGCGCTTCAAGGTGCACATGGAGGGCTCCGTGAACGGC	1	35	Insertion	0	1		21	MRFPSIFTAVLFAASSALAA*											MRFPSIFTAVLFAASSALAASKKKKKASGVSKGEEDNMAIIKEFMRFKVHMEGSVNG	ATGAGATTTCCTTCAATTTTTACTGCTGTTTTATTCGCAGCATCCTCCGCATTAGCTGCTTAGCGATCACGATCTTGATGCAAGCGGTGTGAGCAAGGGCGAGGAGGATAACATGGCCATCATCAAGGAGTTCATGCGCTTCAAGGTGCACATGGAGGGCTCCGTGAACGGC	ATGAGATTTCCTTCAATTTTTACTGCTGTTTTATTCGCAGCATCCTCCGCATTAGCTGCTAGCAAAAAAAAAAAAAAAGCAAGCGGTGTGAGCAAGGGCGAGGAGGATAACATGGCCATCATCAAGGAGTTCATGCGCTTCAAGGTGCACATGGAGGGCTCCGTGAACGGC
ATGAGATTTCCTTCAATTTTTACTGCTGTTTTATTCGCAGCATCCTCCGCATTAGCTGCTtagcggggcagtAGTc------------ATAGCAAGCGGTGTGAGCAAGGGCGAGGAGGATAACATGGCCATCATCAAGGAGTTCATGCGCTTCAAGGTGCACATGGAGGGCTCCGTGAACGGC	1	31	Insertion and Deletion	0	1		21	MRFPSIFTAVLFAASSALAA*											MRFPSIFTAVLFAASSALAASKKKKKASGVSKGEEDNMAIIKEFMRFKVHMEGSVNG	ATGAGATTTCCTTCAATTTTTACTGCTGTTTTATTCGCAGCATCCTCCGCATTAGCTGCTTAGCGGGGCAGTAGTC------------ATAGCAAGCGGTGTGAGCAAGGGCGAGGAGGATAACATGGCCATCATCAAGGAGTTCATGCGCTTCAAGGTGCACATGGAGGGCTCCGTGAACGGC	ATGAGATTTCCTTCAATTTTTACTGCTGTTTTATTCGCAGCATCCTCCGCATTAGCTGCTAGCAAAAAAAAAAAAAAAGCAAGCGGTGTGAGCAAGGGCGAGGAGGATAACATGGCCATCATCAAGGAGTTCATGCGCTTCAAGGTGCACATGGAGGGCTCCGTGAACGGC
ATGAGATTTCCTTCAATTTTTACTGCTGTTTTATTCGCAGCATCCTCCGCATTAGCTGCTtAGCggggggatgtgattcc---------------GCAAGCGGTGTGAGCAAGGGCGAGGAGGATAACATGGCCATCATCAAGGAGTTCATGCGCTTCAAGGTGCACATGGAGGGCTCCGTGAACGGC	1	28	Insertion and Deletion	0	2		21	MRFPSIFTAVLFAASSALAA*											MRFPSIFTAVLFAASSALAASKKKKKASGVSKGEEDNMAIIKEFMRFKVHMEGSVNG	ATGAGATTTCCTTCAATTTTTACTGCTGTTTTATTCGCAGCATCCTCCGCATTAGCTGCTTAGCGGGGGGATGTGATTCC---------------GCAAGCGGTGTGAGCAAGGGCGAGGAGGATAACATGGCCATCATCAAGGAGTTCATGCGCTTCAAGGTGCACATGGAGGGCTCCGTGAACGGC	ATGAGATTTCCTTCAATTTTTACTGCTGTTTTATTCGCAGCATCCTCCGCATTAGCTGCTAGCAAAAAAAAAAAAAAAGCAAGCGGTGTGAGCAAGGGCGAGGAGGATAACATGGCCATCATCAAGGAGTTCATGCGCTTCAAGGTGCACATGGAGGGCTCCGTGAACGGC
ATGAGATTTCCTTCAATTTTTACTGCTGTTTTATTCGCAGCATCCTCCGCATTAGCTGCTtAGCgttacattctgattc---------------GCAAGCGGTGTGAGCAAGGGCGAGGAGGATAACATGGCCATCATCAAGGAGTTCATGCGCTTCAAGGTGCACATGGAGGGCTCCGTGAACGGC	1	34	Insertion and Deletion	0	1		21	MRFPSIFTAVLFAASSALAA*											MRFPSIFTAVLFAASSALAASKKKKKASGVSKGEEDNMAIIKEFMRFKVHMEGSVNG	ATGAGATTTCCTTCAATTTTTACTGCTGTTTTATTCGCAGCATCCTCCGCATTAGCTGCTTAGCGTTACATTCTGATTC---------------GCAAGCGGTGTGAGCAAGGGCGAGGAGGATAACATGGCCATCATCAAGGAGTTCATGCGCTTCAAGGTGCACATGGAGGGCTCCGTGAACGGC	ATGAGATTTCCTTCAATTTTTACTGCTGTTTTATTCGCAGCATCCTCCGCATTAGCTGCTAGCAAAAAAAAAAAAAAAGCAAGCGGTGTGAGCAAGGGCGAGGAGGATAACATGGCCATCATCAAGGAGTTCATGCGCTTCAAGGTGCACATGGAGGGCTCCGTGAACGGC
ATGAGATTTCCTTCAATTTTTACTGCTGTTTTATTCGCAGCATCCTCCGCATTAGCTGCTtagctcggtttATC----------AACTGGCAAGCGGTGTGAGCAAGGGCGAGGAGGATAACATGGCCATCATCAAGGAGTTCATGCGCTTCAAGGTGCACATGGAGGGCTCCGTGAACGGC	1	36	Insertion and Deletion	0	1		21	MRFPSIFTAVLFAASSALAA*											MRFPSIFTAVLFAASSALAASKKKKKASGVSKGEEDNMAIIKEFMRFKVHMEGSVNG	ATGAGATTTCCTTCAATTTTTACTGCTGTTTTATTCGCAGCATCCTCCGCATTAGCTGCTTAGCTCGGTTTATC----------AACTGGCAAGCGGTGTGAGCAAGGGCGAGGAGGATAACATGGCCATCATCAAGGAGTTCATGCGCTTCAAGGTGCACATGGAGGGCTCCGTGAACGGC	ATGAGATTTCCTTCAATTTTTACTGCTGTTTTATTCGCAGCATCCTCCGCATTAGCTGCTAGCAAAAAAAAAAAAAAAGCAAGCGGTGTGAGCAAGGGCGAGGAGGATAACATGGCCATCATCAAGGAGTTCATGCGCTTCAAGGTGCACATGGAGGGCTCCGTGAACGGC
ATGAGATTTCCTTCAATTTTTACTGCTGTTTTATTCGCAGCATCCTCCGCATTAGCTGCTtAGCTctagggggta----------TATGGCAAGCGGTGTGAGCAAGGGCGAGGAGGATAACATGGCCATCATCAAGGAGTTCATGCGCTTCAAGGTGCACATGGAGGGCTCCGTGAACGGC	1	34	Insertion and Deletion	0	1		21	MRFPSIFTAVLFAASSALAA*											MRFPSIFTAVLFAASSALAASKKKKKASGVSKGEEDNMAIIKEFMRFKVHMEGSVNG	ATGAGATTTCCTTCAATTTTTACTGCTGTTTTATTCGCAGCATCCTCCGCATTAGCTGCTTAGCTCTAGGGGGTA----------TATGGCAAGCGGTGTGAGCAAGGGCGAGGAGGATAACATGGCCATCATCAAGGAGTTCATGCGCTTCAAGGTGCACATGGAGGGCTCCGTGAACGGC	ATGAGATTTCCTTCAATTTTTACTGCTGTTTTATTCGCAGCATCCTCCGCATTAGCTGCTAGCAAAAAAAAAAAAAAAGCAAGCGGTGTGAGCAAGGGCGAGGAGGATAACATGGCCATCATCAAGGAGTTCATGCGCTTCAAGGTGCACATGGAGGGCTCCGTGAACGGC
ATGAGATTTCCTTCAATTTTTACTGCTGTTTTATTCGCAGCATCCTCCGCATTAGCTGCTtAGCTgtgatgtta---------ATATGGCAAGCGGTGTGAGCAAGGGCGAGGAGGATAACATGGCCATCATCAAGGAGTTCATGCGCTTCAAGGTGCACATGGAGGGCTCCGTGAACGGC	1	36	Insertion and Deletion	0	1		21	MRFPSIFTAVLFAASSALAA*											MRFPSIFTAVLFAASSALAASKKKKKASGVSKGEEDNMAIIKEFMRFKVHMEGSVNG	ATGAGATTTCCTTCAATTTTTACTGCTGTTTTATTCGCAGCATCCTCCGCATTAGCTGCTTAGCTGTGATGTTA---------ATATGGCAAGCGGTGTGAGCAAGGGCGAGGAGGATAACATGGCCATCATCAAGGAGTTCATGCGCTTCAAGGTGCACATGGAGGGCTCCGTGAACGGC	ATGAGATTTCCTTCAATTTTTACTGCTGTTTTATTCGCAGCATCCTCCGCATTAGCTGCTAGCAAAAAAAAAAAAAAAGCAAGCGGTGTGAGCAAGGGCGAGGAGGATAACATGGCCATCATCAAGGAGTTCATGCGCTTCAAGGTGCACATGGAGGGCTCCGTGAACGGC
ATGAGATTTCCTTCAATTTTTACTGCTGTTTTATTCGCAGCATCCTCCGCATTAGCTGCTtAGCTGTGTACATGTAAAGGCAAGCGGTGTGAGCAAGGGCGAGGAGGATAACATGGCCATCATCAAGGAGTTCATGCGCTTCAAGGTGCACATGGAGGGCTCCGTGAACGGC	1	31	Insertion	0	1		21	MRFPSIFTAVLFAASSALAA*											MRFPSIFTAVLFAASSALAASKKKKKASGVSKGEEDNMAIIKEFMRFKVHMEGSVNG	ATGAGATTTCCTTCAATTTTTACTGCTGTTTTATTCGCAGCATCCTCCGCATTAGCTGCTTAGCTGTGTACATGTAAAGGCAAGCGGTGTGAGCAAGGGCGAGGAGGATAACATGGCCATCATCAAGGAGTTCATGCGCTTCAAGGTGCACATGGAGGGCTCCGTGAACGGC	ATGAGATTTCCTTCAATTTTTACTGCTGTTTTATTCGCAGCATCCTCCGCATTAGCTGCTAGCAAAAAAAAAAAAAAAGCAAGCGGTGTGAGCAAGGGCGAGGAGGATAACATGGCCATCATCAAGGAGTTCATGCGCTTCAAGGTGCACATGGAGGGCTCCGTGAACGGC
ATGAGATTTCCTTCAATTTTTACTGCTGTTTTATTCGCAGCATCCTCCGCATTAGCTGCTtAGCTGTTCAATACCATATGCAAGCGGTGTGAGCAAGGGCGAGGAGGATAACATGGCCATCATCAAGGAGTTCATGCGCTTCAAGGTGCACATGGAGGGCTCCGTGAACGGC	1	35	Insertion	0	1		21	MRFPSIFTAVLFAASSALAA*											MRFPSIFTAVLFAASSALAASKKKKKASGVSKGEEDNMAIIKEFMRFKVHMEGSVNG	ATGAGATTTCCTTCAATTTTTACTGCTGTTTTATTCGCAGCATCCTCCGCATTAGCTGCTTAGCTGTTCAATACCATATGCAAGCGGTGTGAGCAAGGGCGAGGAGGATAACATGGCCATCATCAAGGAGTTCATGCGCTTCAAGGTGCACATGGAGGGCTCCGTGAACGGC	ATGAGATTTCCTTCAATTTTTACTGCTGTTTTATTCGCAGCATCCTCCGCATTAGCTGCTAGCAAAAAAAAAAAAAAAGCAAGCGGTGTGAGCAAGGGCGAGGAGGATAACATGGCCATCATCAAGGAGTTCATGCGCTTCAAGGTGCACATGGAGGGCTCCGTGAACGGC
ATGAGATTTCCTTCAATTTTTACTGCTGTTTTATTCGCAGCATCCTCCGCATTAGCTGCTtAGCTtcttgatcattctg--------------GCAAGCGGTGTGAGCAAGGGCGAGGAGGATAACATGGCCATCATCAAGGAGTTCATGCGCTTCAAGGTGCACATGGAGGGCTCCGTGAACGGC	1	36	Insertion and Deletion	0	1		21	MRFPSIFTAVLFAASSALAA*											MRFPSIFTAVLFAASSALAASKKKKKASGVSKGEEDNMAIIKEFMRFKVHMEGSVNG	ATGAGATTTCCTTCAATTTTTACTGCTGTTTTATTCGCAGCATCCTCCGCATTAGCTGCTTAGCTTCTTGATCATTCTG--------------GCAAGCGGTGTGAGCAAGGGCGAGGAGGATAACATGGCCATCATCAAGGAGTTCATGCGCTTCAAGGTGCACATGGAGGGCTCCGTGAACGGC	ATGAGATTTCCTTCAATTTTTACTGCTGTTTTATTCGCAGCATCCTCCGCATTAGCTGCTAGCAAAAAAAAAAAAAAAGCAAGCGGTGTGAGCAAGGGCGAGGAGGATAACATGGCCATCATCAAGGAGTTCATGCGCTTCAAGGTGCACATGGAGGGCTCCGTGAACGGC
ATGAGATTTCCTTCAATTTTTACTGCTGTTTTATTCGCAGCATCCTCCGCATTAGCTGCTtagcttggcacgtggttAG----------------GCAAGCGGTGTGAGCAAGGGCGAGGAGGATAACATGGCCATCATCAAGGAGTTCATGCGCTTCAAGGTGCACATGGAGGGCTCCGTGAACGGC	1	36	Insertion and Deletion	0	1		21	MRFPSIFTAVLFAASSALAA*											MRFPSIFTAVLFAASSALAASKKKKKASGVSKGEEDNMAIIKEFMRFKVHMEGSVNG	ATGAGATTTCCTTCAATTTTTACTGCTGTTTTATTCGCAGCATCCTCCGCATTAGCTGCTTAGCTTGGCACGTGGTTAG----------------GCAAGCGGTGTGAGCAAGGGCGAGGAGGATAACATGGCCATCATCAAGGAGTTCATGCGCTTCAAGGTGCACATGGAGGGCTCCGTGAACGGC	ATGAGATTTCCTTCAATTTTTACTGCTGTTTTATTCGCAGCATCCTCCGCATTAGCTGCTAGCAAAAAAAAAAAAAAAGCAAGCGGTGTGAGCAAGGGCGAGGAGGATAACATGGCCATCATCAAGGAGTTCATGCGCTTCAAGGTGCACATGGAGGGCTCCGTGAACGGC
ATGAGATTTCCTTCAATTTTTACTGCTGTTTTATTCGCAGCATCCTCCGCATTAGCTGCTTagctttatcacacgcgaG----------------GCAAGCGGTGTGAGCAAGGGCGAGGAGGATAACATGGCCATCATCAAGGAGTTCATGCGCTTCAAGGTGCACATGGAGGGCTCCGTGAACGGC	1	35	Insertion and Deletion	0	1		21	MRFPSIFTAVLFAASSALAA*											MRFPSIFTAVLFAASSALAASKKKKKASGVSKGEEDNMAIIKEFMRFKVHMEGSVNG	ATGAGATTTCCTTCAATTTTTACTGCTGTTTTATTCGCAGCATCCTCCGCATTAGCTGCTTAGCTTTATCACACGCGAG----------------GCAAGCGGTGTGAGCAAGGGCGAGGAGGATAACATGGCCATCATCAAGGAGTTCATGCGCTTCAAGGTGCACATGGAGGGCTCCGTGAACGGC	ATGAGATTTCCTTCAATTTTTACTGCTGTTTTATTCGCAGCATCCTCCGCATTAGCTGCTAGCAAAAAAAAAAAAAAAGCAAGCGGTGTGAGCAAGGGCGAGGAGGATAACATGGCCATCATCAAGGAGTTCATGCGCTTCAAGGTGCACATGGAGGGCTCCGTGAACGGC
ATGAGATTTCCTTCAATTTTTACTGCTGTTTTATTCGCAGCATCCTCCGCATTAGCTGCTtAGCTttggacgccta-----------ATGGCAAGCGGTGTGAGCAAGGGCGAGGAGGATAACATGGCCATCATCAAGGAGTTCATGCGCTTCAAGGTGCACATGGAGGGCTCCGTGAACGGC	1	35	Insertion and Deletion	0	1		21	MRFPSIFTAVLFAASSALAA*											MRFPSIFTAVLFAASSALAASKKKKKASGVSKGEEDNMAIIKEFMRFKVHMEGSVNG	ATGAGATTTCCTTCAATTTTTACTGCTGTTTTATTCGCAGCATCCTCCGCATTAGCTGCTTAGCTTTGGACGCCTA-----------ATGGCAAGCGGTGTGAGCAAGGGCGAGGAGGATAACATGGCCATCATCAAGGAGTTCATGCGCTTCAAGGTGCACATGGAGGGCTCCGTGAACGGC	ATGAGATTTCCTTCAATTTTTACTGCTGTTTTATTCGCAGCATCCTCCGCATTAGCTGCTAGCAAAAAAAAAAAAAAAGCAAGCGGTGTGAGCAAGGGCGAGGAGGATAACATGGCCATCATCAAGGAGTTCATGCGCTTCAAGGTGCACATGGAGGGCTCCGTGAACGGC
ATGAGATTTCCTTCAATTTTTACTGCTGTTTTATTCGCAGCATCCTCCGCATTAGCTGgCTAGC---------------GGgtggtttcgtattgcAAGCGGTGTGAGCAAGGGCGAGGAGGATAACATGGCCATCATCAAGGAGTTCATGCGCTTCAAGGTGCACATGGAGGGCTCCGTGAACGGC	1	36	Insertion and Deletion	0	1		21	MRFPSIFTAVLFAASSALAG*											MRFPSIFTAVLFAASSALAASKKKKKASGVSKGEEDNMAIIKEFMRFKVHMEGSVNG	ATGAGATTTCCTTCAATTTTTACTGCTGTTTTATTCGCAGCATCCTCCGCATTAGCTGGCTAGC---------------GGGTGGTTTCGTATTGCAAGCGGTGTGAGCAAGGGCGAGGAGGATAACATGGCCATCATCAAGGAGTTCATGCGCTTCAAGGTGCACATGGAGGGCTCCGTGAACGGC	ATGAGATTTCCTTCAATTTTTACTGCTGTTTTATTCGCAGCATCCTCCGCATTAGCTGCTAGCAAAAAAAAAAAAAAAGCAAGCGGTGTGAGCAAGGGCGAGGAGGATAACATGGCCATCATCAAGGAGTTCATGCGCTTCAAGGTGCACATGGAGGGCTCCGTGAACGGC
ATGAGATTTCCTTCAATTTTTACTGCTGTTTTATTCGCAGCATCCTCCGCATTAGCTGgCTAGC--------------ATcttgacttgtgctgCAAGCGGTGTGAGCAAGGGCGAGGAGGATAACATGGCCATCATCAAGGAGTTCATGCGCTTCAAGGTGCACATGGAGGGCTCCGTGAACGGC	1	33	Insertion and Deletion	0	1		21	MRFPSIFTAVLFAASSALAG*											MRFPSIFTAVLFAASSALAASKKKKKASGVSKGEEDNMAIIKEFMRFKVHMEGSVNG	ATGAGATTTCCTTCAATTTTTACTGCTGTTTTATTCGCAGCATCCTCCGCATTAGCTGGCTAGC--------------ATCTTGACTTGTGCTGCAAGCGGTGTGAGCAAGGGCGAGGAGGATAACATGGCCATCATCAAGGAGTTCATGCGCTTCAAGGTGCACATGGAGGGCTCCGTGAACGGC	ATGAGATTTCCTTCAATTTTTACTGCTGTTTTATTCGCAGCATCCTCCGCATTAGCTGCTAGCAAAAAAAAAAAAAAAGCAAGCGGTGTGAGCAAGGGCGAGGAGGATAACATGGCCATCATCAAGGAGTTCATGCGCTTCAAGGTGCACATGGAGGGCTCCGTGAACGGC
ATGAGATTTCCTTCAATTTTTACTGCTGTTTTATTCGCAGCATCCTCCGCATTAGCTGgCTAGC--------------ATtgtatttcattttgCAAGCGGTGTGAGCAAGGGCGAGGAGGATAACATGGCCATCATCAAGGAGTTCATGCGCTTCAAGGTGCACATGGAGGGCTCCGTGAACGGC	1	36	Insertion and Deletion	0	1		21	MRFPSIFTAVLFAASSALAG*											MRFPSIFTAVLFAASSALAASKKKKKASGVSKGEEDNMAIIKEFMRFKVHMEGSVNG	ATGAGATTTCCTTCAATTTTTACTGCTGTTTTATTCGCAGCATCCTCCGCATTAGCTGGCTAGC--------------ATTGTATTTCATTTTGCAAGCGGTGTGAGCAAGGGCGAGGAGGATAACATGGCCATCATCAAGGAGTTCATGCGCTTCAAGGTGCACATGGAGGGCTCCGTGAACGGC	ATGAGATTTCCTTCAATTTTTACTGCTGTTTTATTCGCAGCATCCTCCGCATTAGCTGCTAGCAAAAAAAAAAAAAAAGCAAGCGGTGTGAGCAAGGGCGAGGAGGATAACATGGCCATCATCAAGGAGTTCATGCGCTTCAAGGTGCACATGGAGGGCTCCGTGAACGGC
ATGAGATTTCCTTCAATTTTTACTGCTGTTTTATTCGCAGCATCCTCCGCATTAGCTGgCTAGC-------------CAGgggacttagttggCAAGCGGTGTGAGCAAGGGCGAGGAGGATAACATGGCCATCATCAAGGAGTTCATGCGCTTCAAGGTGCACATGGAGGGCTCCGTGAACGGC	1	36	Insertion and Deletion	0	1		21	MRFPSIFTAVLFAASSALAG*											MRFPSIFTAVLFAASSALAASKKKKKASGVSKGEEDNMAIIKEFMRFKVHMEGSVNG	ATGAGATTTCCTTCAATTTTTACTGCTGTTTTATTCGCAGCATCCTCCGCATTAGCTGGCTAGC-------------CAGGGGACTTAGTTGGCAAGCGGTGTGAGCAAGGGCGAGGAGGATAACATGGCCATCATCAAGGAGTTCATGCGCTTCAAGGTGCACATGGAGGGCTCCGTGAACGGC	ATGAGATTTCCTTCAATTTTTACTGCTGTTTTATTCGCAGCATCCTCCGCATTAGCTGCTAGCAAAAAAAAAAAAAAAGCAAGCGGTGTGAGCAAGGGCGAGGAGGATAACATGGCCATCATCAAGGAGTTCATGCGCTTCAAGGTGCACATGGAGGGCTCCGTGAACGGC
ATGAGATTTCCTTCAATTTTTACTGCTGTTTTATTCGCAGCATCCTCCGCATTAGCTGgCTAGC------------ATgtcctagccttaCGCAAGCGGTGTGAGCAAGGGCGAGGAGGATAACATGGCCATCATCAAGGAGTTCATGCGCTTCAAGGTGCACATGGAGGGCTCCGTGAACGGC	1	31	Insertion and Deletion	0	1		21	MRFPSIFTAVLFAASSALAG*											MRFPSIFTAVLFAASSALAASKKKKKASGVSKGEEDNMAIIKEFMRFKVHMEGSVNG	ATGAGATTTCCTTCAATTTTTACTGCTGTTTTATTCGCAGCATCCTCCGCATTAGCTGGCTAGC------------ATGTCCTAGCCTTACGCAAGCGGTGTGAGCAAGGGCGAGGAGGATAACATGGCCATCATCAAGGAGTTCATGCGCTTCAAGGTGCACATGGAGGGCTCCGTGAACGGC	ATGAGATTTCCTTCAATTTTTACTGCTGTTTTATTCGCAGCATCCTCCGCATTAGCTGCTAGCAAAAAAAAAAAAAAAGCAAGCGGTGTGAGCAAGGGCGAGGAGGATAACATGGCCATCATCAAGGAGTTCATGCGCTTCAAGGTGCACATGGAGGGCTCCGTGAACGGC
ATGAGATTTCCTTCAATTTTTACTGCTGTTTTATTCGCAGCATCCTCCGCATTAGCTGgCTAGC--------GAATGAAGttttttggCAAGCGGTGTGAGCAAGGGCGAGGAGGATAACATGGCCATCATCAAGGAGTTCATGCGCTTCAAGGTGCACATGGAGGGCTCCGTGAACGGC	1	36	Insertion and Deletion	0	1		21	MRFPSIFTAVLFAASSALAG*											MRFPSIFTAVLFAASSALAASKKKKKASGVSKGEEDNMAIIKEFMRFKVHMEGSVNG	ATGAGATTTCCTTCAATTTTTACTGCTGTTTTATTCGCAGCATCCTCCGCATTAGCTGGCTAGC--------GAATGAAGTTTTTTGGCAAGCGGTGTGAGCAAGGGCGAGGAGGATAACATGGCCATCATCAAGGAGTTCATGCGCTTCAAGGTGCACATGGAGGGCTCCGTGAACGGC	ATGAGATTTCCTTCAATTTTTACTGCTGTTTTATTCGCAGCATCCTCCGCATTAGCTGCTAGCAAAAAAAAAAAAAAAGCAAGCGGTGTGAGCAAGGGCGAGGAGGATAACATGGCCATCATCAAGGAGTTCATGCGCTTCAAGGTGCACATGGAGGGCTCCGTGAACGGC
ATGAGATTTCCTTCAATTTTTACTGCTGTTTTATTCGCAGCATCCTCCGCATTAGCTGgCTAGC-------ACtcctgtaGATGAGGCAAGCGGTGTGAGCAAGGGCGAGGAGGATAACATGGCCATCATCAAGGAGTTCATGCGCTTCAAGGTGCACATGGAGGGCTCCGTGAACGGC	1	35	Insertion and Deletion	0	1		21	MRFPSIFTAVLFAASSALAG*											MRFPSIFTAVLFAASSALAASKKKKKASGVSKGEEDNMAIIKEFMRFKVHMEGSVNG	ATGAGATTTCCTTCAATTTTTACTGCTGTTTTATTCGCAGCATCCTCCGCATTAGCTGGCTAGC-------ACTCCTGTAGATGAGGCAAGCGGTGTGAGCAAGGGCGAGGAGGATAACATGGCCATCATCAAGGAGTTCATGCGCTTCAAGGTGCACATGGAGGGCTCCGTGAACGGC	ATGAGATTTCCTTCAATTTTTACTGCTGTTTTATTCGCAGCATCCTCCGCATTAGCTGCTAGCAAAAAAAAAAAAAAAGCAAGCGGTGTGAGCAAGGGCGAGGAGGATAACATGGCCATCATCAAGGAGTTCATGCGCTTCAAGGTGCACATGGAGGGCTCCGTGAACGGC
ATGAGATTTCCTTCAATTTTTACTGCTGTTTTATTCGCAGCATCCTCCGCATTAGCTGgCTAGCACAATGGCACTAGCCGCAAGCGGTGTGAGCAAGGGCGAGGAGGATAACATGGCCATCATCAAGGAGTTCATGCGCTTCAAGGTGCACATGGAGGGCTCCGTGAACGGC	1	33	Insertion	0	1		21	MRFPSIFTAVLFAASSALAG*											MRFPSIFTAVLFAASSALAASKKKKKASGVSKGEEDNMAIIKEFMRFKVHMEGSVNG	ATGAGATTTCCTTCAATTTTTACTGCTGTTTTATTCGCAGCATCCTCCGCATTAGCTGGCTAGCACAATGGCACTAGCCGCAAGCGGTGTGAGCAAGGGCGAGGAGGATAACATGGCCATCATCAAGGAGTTCATGCGCTTCAAGGTGCACATGGAGGGCTCCGTGAACGGC	ATGAGATTTCCTTCAATTTTTACTGCTGTTTTATTCGCAGCATCCTCCGCATTAGCTGCTAGCAAAAAAAAAAAAAAAGCAAGCGGTGTGAGCAAGGGCGAGGAGGATAACATGGCCATCATCAAGGAGTTCATGCGCTTCAAGGTGCACATGGAGGGCTCCGTGAACGGC
ATGAGATTTCCTTCAATTTTTACTGCTGTTTTATTCGCAGCATCCTCCGCATTAGCTGgCTAGCAGCTCAAATTGCAAGGCAAGCGGTGTGAGCAAGGGCGAGGAGGATAACATGGCCATCATCAAGGAGTTCATGCGCTTCAAGGTGCACATGGAGGGCTCCGTGAACGGC	1	26	Insertion	0	1		21	MRFPSIFTAVLFAASSALAG*											MRFPSIFTAVLFAASSALAASKKKKKASGVSKGEEDNMAIIKEFMRFKVHMEGSVNG	ATGAGATTTCCTTCAATTTTTACTGCTGTTTTATTCGCAGCATCCTCCGCATTAGCTGGCTAGCAGCTCAAATTGCAAGGCAAGCGGTGTGAGCAAGGGCGAGGAGGATAACATGGCCATCATCAAGGAGTTCATGCGCTTCAAGGTGCACATGGAGGGCTCCGTGAACGGC	ATGAGATTTCCTTCAATTTTTACTGCTGTTTTATTCGCAGCATCCTCCGCATTAGCTGCTAGCAAAAAAAAAAAAAAAGCAAGCGGTGTGAGCAAGGGCGAGGAGGATAACATGGCCATCATCAAGGAGTTCATGCGCTTCAAGGTGCACATGGAGGGCTCCGTGAACGGC
ATGAGATTTCCTTCAATTTTTACTGCTGTTTTATTCGCAGCATCCTCCGCATTAGCTGgCTAGCATACGCGCCAAAAAAGCAAGCGGTGTGAGCAAGGGCGAGGAGGATAACATGGCCATCATCAAGGAGTTCATGCGCTTCAAGGTGCACATGGAGGGCTCCGTGAACGGC	1	35	Insertion	0	1		21	MRFPSIFTAVLFAASSALAG*											MRFPSIFTAVLFAASSALAASKKKKKASGVSKGEEDNMAIIKEFMRFKVHMEGSVNG	ATGAGATTTCCTTCAATTTTTACTGCTGTTTTATTCGCAGCATCCTCCGCATTAGCTGGCTAGCATACGCGCCAAAAAAGCAAGCGGTGTGAGCAAGGGCGAGGAGGATAACATGGCCATCATCAAGGAGTTCATGCGCTTCAAGGTGCACATGGAGGGCTCCGTGAACGGC	ATGAGATTTCCTTCAATTTTTACTGCTGTTTTATTCGCAGCATCCTCCGCATTAGCTGCTAGCAAAAAAAAAAAAAAAGCAAGCGGTGTGAGCAAGGGCGAGGAGGATAACATGGCCATCATCAAGGAGTTCATGCGCTTCAAGGTGCACATGGAGGGCTCCGTGAACGGC
ATGAGATTTCCTTCAATTTTTACTGCTGTTTTATTCGCAGCATCCTCCGCATTAGCTGGctagccctgactTAGC-----------ATCGGCAAGCGGTGTGAGCAAGGGCGAGGAGGATAACATGGCCATCATCAAGGAGTTCATGCGCTTCAAGGTGCACATGGAGGGCTCCGTGAACGGC	1	35	Insertion and Deletion	0	1		21	MRFPSIFTAVLFAASSALAG*											MRFPSIFTAVLFAASSALAASKKKKKASGVSKGEEDNMAIIKEFMRFKVHMEGSVNG	ATGAGATTTCCTTCAATTTTTACTGCTGTTTTATTCGCAGCATCCTCCGCATTAGCTGGCTAGCCCTGACTTAGC-----------ATCGGCAAGCGGTGTGAGCAAGGGCGAGGAGGATAACATGGCCATCATCAAGGAGTTCATGCGCTTCAAGGTGCACATGGAGGGCTCCGTGAACGGC	ATGAGATTTCCTTCAATTTTTACTGCTGTTTTATTCGCAGCATCCTCCGCATTAGCTGCTAGCAAAAAAAAAAAAAAAGCAAGCGGTGTGAGCAAGGGCGAGGAGGATAACATGGCCATCATCAAGGAGTTCATGCGCTTCAAGGTGCACATGGAGGGCTCCGTGAACGGC
ATGAGATTTCCTTCAATTTTTACTGCTGTTTTATTCGCAGCATCCTCCGCATTAGCTGgCTAGCCGACACTTAGCCGAGGCAAGCGGTGTGAGCAAGGGCGAGGAGGATAACATGGCCATCATCAAGGAGTTCATGCGCTTCAAGGTGCACATGGAGGGCTCCGTGAACGGC	1	34	Insertion	0	1		21	MRFPSIFTAVLFAASSALAG*											MRFPSIFTAVLFAASSALAASKKKKKASGVSKGEEDNMAIIKEFMRFKVHMEGSVNG	ATGAGATTTCCTTCAATTTTTACTGCTGTTTTATTCGCAGCATCCTCCGCATTAGCTGGCTAGCCGACACTTAGCCGAGGCAAGCGGTGTGAGCAAGGGCGAGGAGGATAACATGGCCATCATCAAGGAGTTCATGCGCTTCAAGGTGCACATGGAGGGCTCCGTGAACGGC	ATGAGATTTCCTTCAATTTTTACTGCTGTTTTATTCGCAGCATCCTCCGCATTAGCTGCTAGCAAAAAAAAAAAAAAAGCAAGCGGTGTGAGCAAGGGCGAGGAGGATAACATGGCCATCATCAAGGAGTTCATGCGCTTCAAGGTGCACATGGAGGGCTCCGTGAACGGC
ATGAGATTTCCTTCAATTTTTACTGCTGTTTTATTCGCAGCATCCTCCGCATTAGCTGgCTAGCCgtgcta------------AAGtgggcgCAAGCGGTGTGAGCAAGGGCGAGGAGGATAACATGGCCATCATCAAGGAGTTCATGCGCTTCAAGGTGCACATGGAGGGCTCCGTGAACGGC	1	35	Insertion and Deletion	0	1		21	MRFPSIFTAVLFAASSALAG*											MRFPSIFTAVLFAASSALAASKKKKKASGVSKGEEDNMAIIKEFMRFKVHMEGSVNG	ATGAGATTTCCTTCAATTTTTACTGCTGTTTTATTCGCAGCATCCTCCGCATTAGCTGGCTAGCCGTGCTA------------AAGTGGGCGCAAGCGGTGTGAGCAAGGGCGAGGAGGATAACATGGCCATCATCAAGGAGTTCATGCGCTTCAAGGTGCACATGGAGGGCTCCGTGAACGGC	ATGAGATTTCCTTCAATTTTTACTGCTGTTTTATTCGCAGCATCCTCCGCATTAGCTGCTAGCAAAAAAAAAAAAAAAGCAAGCGGTGTGAGCAAGGGCGAGGAGGATAACATGGCCATCATCAAGGAGTTCATGCGCTTCAAGGTGCACATGGAGGGCTCCGTGAACGGC
ATGAGATTTCCTTCAATTTTTACTGCTGTTTTATTCGCAGCATCCTCCGCATTAGCTGgCTAGCCttttacgggacggt--------------GCAAGCGGTGTGAGCAAGGGCGAGGAGGATAACATGGCCATCATCAAGGAGTTCATGCGCTTCAAGGTGCACATGGAGGGCTCCGTGAACGGC	1	35	Insertion and Deletion	0	1		21	MRFPSIFTAVLFAASSALAG*											MRFPSIFTAVLFAASSALAASKKKKKASGVSKGEEDNMAIIKEFMRFKVHMEGSVNG	ATGAGATTTCCTTCAATTTTTACTGCTGTTTTATTCGCAGCATCCTCCGCATTAGCTGGCTAGCCTTTTACGGGACGGT--------------GCAAGCGGTGTGAGCAAGGGCGAGGAGGATAACATGGCCATCATCAAGGAGTTCATGCGCTTCAAGGTGCACATGGAGGGCTCCGTGAACGGC	ATGAGATTTCCTTCAATTTTTACTGCTGTTTTATTCGCAGCATCCTCCGCATTAGCTGCTAGCAAAAAAAAAAAAAAAGCAAGCGGTGTGAGCAAGGGCGAGGAGGATAACATGGCCATCATCAAGGAGTTCATGCGCTTCAAGGTGCACATGGAGGGCTCCGTGAACGGC
ATGAGATTTCCTTCAATTTTTACTGCTGTTTTATTCGCAGCATCCTCCGCATTAGCTGgCTAGCGCGGACCCAGGATATGCAAGCGGTGTGAGCAAGGGCGAGGAGGATAACATGGCCATCATCAAGGAGTTCATGCGCTTCAAGGTGCACATGGAGGGCTCCGTGAACGGC	1	36	Insertion	0	1		21	MRFPSIFTAVLFAASSALAG*											MRFPSIFTAVLFAASSALAASKKKKKASGVSKGEEDNMAIIKEFMRFKVHMEGSVNG	ATGAGATTTCCTTCAATTTTTACTGCTGTTTTATTCGCAGCATCCTCCGCATTAGCTGGCTAGCGCGGACCCAGGATATGCAAGCGGTGTGAGCAAGGGCGAGGAGGATAACATGGCCATCATCAAGGAGTTCATGCGCTTCAAGGTGCACATGGAGGGCTCCGTGAACGGC	ATGAGATTTCCTTCAATTTTTACTGCTGTTTTATTCGCAGCATCCTCCGCATTAGCTGCTAGCAAAAAAAAAAAAAAAGCAAGCGGTGTGAGCAAGGGCGAGGAGGATAACATGGCCATCATCAAGGAGTTCATGCGCTTCAAGGTGCACATGGAGGGCTCCGTGAACGGC
ATGAGATTTCCTTCAATTTTTACTGCTGTTTTATTCGCAGCATCCTCCGCATTAGCTGgCTAGCGgtcatgaggtga------------AGGCAAGCGGTGTGAGCAAGGGCGAGGAGGATAACATGGCCATCATCAAGGAGTTCATGCGCTTCAAGGTGCACATGGAGGGATCCGTGAACGGC	1	29	Insertion and Deletion	0	1		21	MRFPSIFTAVLFAASSALAG*											MRFPSIFTAVLFAASSALAASKKKKKASGVSKGEEDNMAIIKEFMRFKVHMEGSVNG	ATGAGATTTCCTTCAATTTTTACTGCTGTTTTATTCGCAGCATCCTCCGCATTAGCTGGCTAGCGGTCATGAGGTGA------------AGGCAAGCGGTGTGAGCAAGGGCGAGGAGGATAACATGGCCATCATCAAGGAGTTCATGCGCTTCAAGGTGCACATGGAGGGATCCGTGAACGGC	ATGAGATTTCCTTCAATTTTTACTGCTGTTTTATTCGCAGCATCCTCCGCATTAGCTGCTAGCAAAAAAAAAAAAAAAGCAAGCGGTGTGAGCAAGGGCGAGGAGGATAACATGGCCATCATCAAGGAGTTCATGCGCTTCAAGGTGCACATGGAGGGCTCCGTGAACGGC
ATGAGATTTCCTTCAATTTTTACTGCTGTTTTATTCGCAGCATCCTCCGCATTAGCTGgCTAGCGtttta----AATCAACCAGGCAAGCGGTGTGAGCAAGGGCGAGGAGGATAACATGGCCATCATCAAGGAGTTCATGCGCTTCAAGGTGCACATGGAGGGCTCCGTGAACGGC	1	29	Insertion and Deletion	0	2		21	MRFPSIFTAVLFAASSALAG*											MRFPSIFTAVLFAASSALAASKKKKKASGVSKGEEDNMAIIKEFMRFKVHMEGSVNG	ATGAGATTTCCTTCAATTTTTACTGCTGTTTTATTCGCAGCATCCTCCGCATTAGCTGGCTAGCGTTTTA----AATCAACCAGGCAAGCGGTGTGAGCAAGGGCGAGGAGGATAACATGGCCATCATCAAGGAGTTCATGCGCTTCAAGGTGCACATGGAGGGCTCCGTGAACGGC	ATGAGATTTCCTTCAATTTTTACTGCTGTTTTATTCGCAGCATCCTCCGCATTAGCTGCTAGCAAAAAAAAAAAAAAAGCAAGCGGTGTGAGCAAGGGCGAGGAGGATAACATGGCCATCATCAAGGAGTTCATGCGCTTCAAGGTGCACATGGAGGGCTCCGTGAACGGC
ATGAGATTTCCTTCAATTTTTACTGCTGTTTTATTCGCAGCATCCTCCGCATTAGCTGgCTAGCTAATGTACTAACACGGCAAGCGGTGTGAGCAAGGGCGAGGAGGATAACATGGCCATCATCAAGGAGTTCATGCGCTTCAAGGTGCACATGGAGGGCTCCGTGAACGGC	1	36	Insertion	0	1		21	MRFPSIFTAVLFAASSALAG*											MRFPSIFTAVLFAASSALAASKKKKKASGVSKGEEDNMAIIKEFMRFKVHMEGSVNG	ATGAGATTTCCTTCAATTTTTACTGCTGTTTTATTCGCAGCATCCTCCGCATTAGCTGGCTAGCTAATGTACTAACACGGCAAGCGGTGTGAGCAAGGGCGAGGAGGATAACATGGCCATCATCAAGGAGTTCATGCGCTTCAAGGTGCACATGGAGGGCTCCGTGAACGGC	ATGAGATTTCCTTCAATTTTTACTGCTGTTTTATTCGCAGCATCCTCCGCATTAGCTGCTAGCAAAAAAAAAAAAAAAGCAAGCGGTGTGAGCAAGGGCGAGGAGGATAACATGGCCATCATCAAGGAGTTCATGCGCTTCAAGGTGCACATGGAGGGCTCCGTGAACGGC
ATGAGATTTCCTTCAATTTTTACTGCTGTTTTATTCGCAGCATCCTCCGCATTAGCTGgCTAGCTcagttgtgattgga--------------GCAAGCGGTGTGAGCAAGGGCGAGGAGGATAACATGGCCATCATCAAGGAGTTCATGCGCTTCAAGGTGCACATGGAGGGCTCCGTGAACGGC	1	30	Insertion and Deletion	0	1		21	MRFPSIFTAVLFAASSALAG*											MRFPSIFTAVLFAASSALAASKKKKKASGVSKGEEDNMAIIKEFMRFKVHMEGSVNG	ATGAGATTTCCTTCAATTTTTACTGCTGTTTTATTCGCAGCATCCTCCGCATTAGCTGGCTAGCTCAGTTGTGATTGGA--------------GCAAGCGGTGTGAGCAAGGGCGAGGAGGATAACATGGCCATCATCAAGGAGTTCATGCGCTTCAAGGTGCACATGGAGGGCTCCGTGAACGGC	ATGAGATTTCCTTCAATTTTTACTGCTGTTTTATTCGCAGCATCCTCCGCATTAGCTGCTAGCAAAAAAAAAAAAAAAGCAAGCGGTGTGAGCAAGGGCGAGGAGGATAACATGGCCATCATCAAGGAGTTCATGCGCTTCAAGGTGCACATGGAGGGCTCCGTGAACGGC
ATGAGATTTCCTTCAATTTTTACTGCTGTTTTATTCGCAGCATCCTCCGCATTAGCTGgCTAGCTCGAGAGTCAGTAAAGCAAGCGGTGTGAGCAAGGGCGAGGAGGATAACATGGCCATCATCAAGGAGTTCATGCGCTTCAAGGTGCACATGGAGGGCTCCGTGAACGGC	1	35	Insertion	0	1		21	MRFPSIFTAVLFAASSALAG*											MRFPSIFTAVLFAASSALAASKKKKKASGVSKGEEDNMAIIKEFMRFKVHMEGSVNG	ATGAGATTTCCTTCAATTTTTACTGCTGTTTTATTCGCAGCATCCTCCGCATTAGCTGGCTAGCTCGAGAGTCAGTAAAGCAAGCGGTGTGAGCAAGGGCGAGGAGGATAACATGGCCATCATCAAGGAGTTCATGCGCTTCAAGGTGCACATGGAGGGCTCCGTGAACGGC	ATGAGATTTCCTTCAATTTTTACTGCTGTTTTATTCGCAGCATCCTCCGCATTAGCTGCTAGCAAAAAAAAAAAAAAAGCAAGCGGTGTGAGCAAGGGCGAGGAGGATAACATGGCCATCATCAAGGAGTTCATGCGCTTCAAGGTGCACATGGAGGGCTCCGTGAACGGC
ATGAGATTTCCTTCAATTTTTACTGCTGTTTTATTCGCAGCATCCTCCGCATTAGCTGgCTAGCtctccgggccttc-------------ATGCAAGCGGTGTGAGCAAGGGCGAGGAGGATAACATGGCCATCATCAAGGAGTTCATGCGCTTCAAGGTGCACATGGAGGGCTCCGTGAACGGC	1	29	Insertion and Deletion	0	1		21	MRFPSIFTAVLFAASSALAG*											MRFPSIFTAVLFAASSALAASKKKKKASGVSKGEEDNMAIIKEFMRFKVHMEGSVNG	ATGAGATTTCCTTCAATTTTTACTGCTGTTTTATTCGCAGCATCCTCCGCATTAGCTGGCTAGCTCTCCGGGCCTTC-------------ATGCAAGCGGTGTGAGCAAGGGCGAGGAGGATAACATGGCCATCATCAAGGAGTTCATGCGCTTCAAGGTGCACATGGAGGGCTCCGTGAACGGC	ATGAGATTTCCTTCAATTTTTACTGCTGTTTTATTCGCAGCATCCTCCGCATTAGCTGCTAGCAAAAAAAAAAAAAAAGCAAGCGGTGTGAGCAAGGGCGAGGAGGATAACATGGCCATCATCAAGGAGTTCATGCGCTTCAAGGTGCACATGGAGGGCTCCGTGAACGGC
ATGAGATTTCCTTCAATTTTTACTGCTGTTTTATTCGCAGCATCCTCCGCATTAGCTGgCTAGCTTTAAAACTCTGACCGCAAGCGGTGTGAGCAAGGGCGAGGAGGATAACATGGCCATCATCAAGGAGTTCATGCGCTTCAAGGTGCACATGGAGGGCTCCGTGAACGGC	1	27	Insertion	0	1		21	MRFPSIFTAVLFAASSALAG*											MRFPSIFTAVLFAASSALAASKKKKKASGVSKGEEDNMAIIKEFMRFKVHMEGSVNG	ATGAGATTTCCTTCAATTTTTACTGCTGTTTTATTCGCAGCATCCTCCGCATTAGCTGGCTAGCTTTAAAACTCTGACCGCAAGCGGTGTGAGCAAGGGCGAGGAGGATAACATGGCCATCATCAAGGAGTTCATGCGCTTCAAGGTGCACATGGAGGGCTCCGTGAACGGC	ATGAGATTTCCTTCAATTTTTACTGCTGTTTTATTCGCAGCATCCTCCGCATTAGCTGCTAGCAAAAAAAAAAAAAAAGCAAGCGGTGTGAGCAAGGGCGAGGAGGATAACATGGCCATCATCAAGGAGTTCATGCGCTTCAAGGTGCACATGGAGGGCTCCGTGAACGGC
ATGAGATTTCCTTCAATTTTTACTGCTGTTTTATTCGCAGCATCCTCCGCATTAGCTtGCTAGC---------AAGACttacggttaCGCAAGCGGTGTGAGCAAGGGCGAGGAGGATAACATGGCCATCATCAAGGAGTTCATGCGCTTCAAGGTGCACATGGAGGGCTCCGTGAACGGC	1	31	Insertion and Deletion	0	1		21	MRFPSIFTAVLFAASSALAC*											MRFPSIFTAVLFAASSALAASKKKKKASGVSKGEEDNMAIIKEFMRFKVHMEGSVNG	ATGAGATTTCCTTCAATTTTTACTGCTGTTTTATTCGCAGCATCCTCCGCATTAGCTTGCTAGC---------AAGACTTACGGTTACGCAAGCGGTGTGAGCAAGGGCGAGGAGGATAACATGGCCATCATCAAGGAGTTCATGCGCTTCAAGGTGCACATGGAGGGCTCCGTGAACGGC	ATGAGATTTCCTTCAATTTTTACTGCTGTTTTATTCGCAGCATCCTCCGCATTAGCTGCTAGCAAAAAAAAAAAAAAAGCAAGCGGTGTGAGCAAGGGCGAGGAGGATAACATGGCCATCATCAAGGAGTTCATGCGCTTCAAGGTGCACATGGAGGGCTCCGTGAACGGC
ATGAGATTTCCTTCAATTTTTACTGCTGTTTTATTCGCAGCATCCTCCGCATTAGCTtGCTAGCCCAAACAGAAAATAAGCAAGCGGTGTGAGCAAGGGCGAGGAGGATAACATGGCCATCATCAAGGAGTTCATGCGCTTCAAGGTGCACATGGAGGGCTCCGTGAACGGC	1	35	Insertion	0	1		21	MRFPSIFTAVLFAASSALAC*											MRFPSIFTAVLFAASSALAASKKKKKASGVSKGEEDNMAIIKEFMRFKVHMEGSVNG	ATGAGATTTCCTTCAATTTTTACTGCTGTTTTATTCGCAGCATCCTCCGCATTAGCTTGCTAGCCCAAACAGAAAATAAGCAAGCGGTGTGAGCAAGGGCGAGGAGGATAACATGGCCATCATCAAGGAGTTCATGCGCTTCAAGGTGCACATGGAGGGCTCCGTGAACGGC	ATGAGATTTCCTTCAATTTTTACTGCTGTTTTATTCGCAGCATCCTCCGCATTAGCTGCTAGCAAAAAAAAAAAAAAAGCAAGCGGTGTGAGCAAGGGCGAGGAGGATAACATGGCCATCATCAAGGAGTTCATGCGCTTCAAGGTGCACATGGAGGGCTCCGTGAACGGC
ATGAGATTTCCTTCAATTTTTACTGCTGTTTTATTCGCAGCATCCTCCGCATTAGCTtGCTAGCCTCAAAGCCCAATTCGCAAGCGGTGTGAGCAAGGGCGAGGAGGATAACATGGCCATCATCAAGGAGTTCATGCGCTTCAAGGTGCACATGGAGGGCTCCGTGAACGGC	1	34	Insertion	0	1		21	MRFPSIFTAVLFAASSALAC*											MRFPSIFTAVLFAASSALAASKKKKKASGVSKGEEDNMAIIKEFMRFKVHMEGSVNG	ATGAGATTTCCTTCAATTTTTACTGCTGTTTTATTCGCAGCATCCTCCGCATTAGCTTGCTAGCCTCAAAGCCCAATTCGCAAGCGGTGTGAGCAAGGGCGAGGAGGATAACATGGCCATCATCAAGGAGTTCATGCGCTTCAAGGTGCACATGGAGGGCTCCGTGAACGGC	ATGAGATTTCCTTCAATTTTTACTGCTGTTTTATTCGCAGCATCCTCCGCATTAGCTGCTAGCAAAAAAAAAAAAAAAGCAAGCGGTGTGAGCAAGGGCGAGGAGGATAACATGGCCATCATCAAGGAGTTCATGCGCTTCAAGGTGCACATGGAGGGCTCCGTGAACGGC
ATGAGATTTCCTTCAATTTTTACTGCTGTTTTATTCGCAGCATCCTCCGCATTAGCTtGCTAGCCTGCGAGTAAGATGGGCAAGCGGTGTGAGCAAGGGCGAGGAGGATAACATGGCCATCATCAAGGAGTTCATGCGCTTCAAGGTGCACATGGAGGGCTCCGTGAACGGC	1	32	Insertion	0	1		21	MRFPSIFTAVLFAASSALAC*											MRFPSIFTAVLFAASSALAASKKKKKASGVSKGEEDNMAIIKEFMRFKVHMEGSVNG	ATGAGATTTCCTTCAATTTTTACTGCTGTTTTATTCGCAGCATCCTCCGCATTAGCTTGCTAGCCTGCGAGTAAGATGGGCAAGCGGTGTGAGCAAGGGCGAGGAGGATAACATGGCCATCATCAAGGAGTTCATGCGCTTCAAGGTGCACATGGAGGGCTCCGTGAACGGC	ATGAGATTTCCTTCAATTTTTACTGCTGTTTTATTCGCAGCATCCTCCGCATTAGCTGCTAGCAAAAAAAAAAAAAAAGCAAGCGGTGTGAGCAAGGGCGAGGAGGATAACATGGCCATCATCAAGGAGTTCATGCGCTTCAAGGTGCACATGGAGGGCTCCGTGAACGGC
ATGAGATTTCCTTCAATTTTTACTGCTGTTTTATTCGCAGCATCCTCCGCATTAGCTtGCTAGCGATACAACTCCGTAGGCAAGCGGTGTGAGCAAGGGCGAGGAGGATAACATGGCCATCATCAAGGAGTTCATGCGCTTCAAGGTGCACATGGAGGGCTCCGTGAACGGC	1	36	Insertion	0	1		21	MRFPSIFTAVLFAASSALAC*											MRFPSIFTAVLFAASSALAASKKKKKASGVSKGEEDNMAIIKEFMRFKVHMEGSVNG	ATGAGATTTCCTTCAATTTTTACTGCTGTTTTATTCGCAGCATCCTCCGCATTAGCTTGCTAGCGATACAACTCCGTAGGCAAGCGGTGTGAGCAAGGGCGAGGAGGATAACATGGCCATCATCAAGGAGTTCATGCGCTTCAAGGTGCACATGGAGGGCTCCGTGAACGGC	ATGAGATTTCCTTCAATTTTTACTGCTGTTTTATTCGCAGCATCCTCCGCATTAGCTGCTAGCAAAAAAAAAAAAAAAGCAAGCGGTGTGAGCAAGGGCGAGGAGGATAACATGGCCATCATCAAGGAGTTCATGCGCTTCAAGGTGCACATGGAGGGCTCCGTGAACGGC
ATGAGATTTCCTTCAATTTTTACTGCTGTTTTATTCGCAGCATCCTCCGCATTAGCTtGCTAGCGTATACATTGAACCGGCAAGCGGTGTGAGCAAGGGCGAGGAGGATAACATGGCCATCATCAAGGAGTTCATGCGCTTCAAGGTGCACATGGAGGGCTCCGTGAACGGC	1	36	Insertion	0	1		21	MRFPSIFTAVLFAASSALAC*											MRFPSIFTAVLFAASSALAASKKKKKASGVSKGEEDNMAIIKEFMRFKVHMEGSVNG	ATGAGATTTCCTTCAATTTTTACTGCTGTTTTATTCGCAGCATCCTCCGCATTAGCTTGCTAGCGTATACATTGAACCGGCAAGCGGTGTGAGCAAGGGCGAGGAGGATAACATGGCCATCATCAAGGAGTTCATGCGCTTCAAGGTGCACATGGAGGGCTCCGTGAACGGC	ATGAGATTTCCTTCAATTTTTACTGCTGTTTTATTCGCAGCATCCTCCGCATTAGCTGCTAGCAAAAAAAAAAAAAAAGCAAGCGGTGTGAGCAAGGGCGAGGAGGATAACATGGCCATCATCAAGGAGTTCATGCGCTTCAAGGTGCACATGGAGGGCTCCGTGAACGGC
ATGAGATTTCCTTCAATTTTTACTGCTGTTTTATTCGCAGCATCCTCCGCATTAGCTtGCTAGCTCCGAGACAGATATAGCAAGCGGTGTGAGCAAGGGCGAGGAGGATAACATGGCCATCATCAAGGAGTTCATGCGCTTCAAGGTGCACATGGAGGGCTCCGTGAACGGC	1	36	Insertion	0	1		21	MRFPSIFTAVLFAASSALAC*											MRFPSIFTAVLFAASSALAASKKKKKASGVSKGEEDNMAIIKEFMRFKVHMEGSVNG	ATGAGATTTCCTTCAATTTTTACTGCTGTTTTATTCGCAGCATCCTCCGCATTAGCTTGCTAGCTCCGAGACAGATATAGCAAGCGGTGTGAGCAAGGGCGAGGAGGATAACATGGCCATCATCAAGGAGTTCATGCGCTTCAAGGTGCACATGGAGGGCTCCGTGAACGGC	ATGAGATTTCCTTCAATTTTTACTGCTGTTTTATTCGCAGCATCCTCCGCATTAGCTGCTAGCAAAAAAAAAAAAAAAGCAAGCGGTGTGAGCAAGGGCGAGGAGGATAACATGGCCATCATCAAGGAGTTCATGCGCTTCAAGGTGCACATGGAGGGCTCCGTGAACGGC
ATGAGATTTCCTTCAATTTTTACTGCTGTTTTATTCGCAGCATCCTCCGCATTAGCTtGCTAGCtttcttttc---------ACAGGTGCAAGCGGTGTGAGCAAGGGCGAGGAGGATAACATGGCCATCATCAAGGAGTTCATGCGCTTCAAGGTGCACATGGAGGGCTCCGTGAACGGC	1	35	Insertion and Deletion	0	1		21	MRFPSIFTAVLFAASSALAC*											MRFPSIFTAVLFAASSALAASKKKKKASGVSKGEEDNMAIIKEFMRFKVHMEGSVNG	ATGAGATTTCCTTCAATTTTTACTGCTGTTTTATTCGCAGCATCCTCCGCATTAGCTTGCTAGCTTTCTTTTC---------ACAGGTGCAAGCGGTGTGAGCAAGGGCGAGGAGGATAACATGGCCATCATCAAGGAGTTCATGCGCTTCAAGGTGCACATGGAGGGCTCCGTGAACGGC	ATGAGATTTCCTTCAATTTTTACTGCTGTTTTATTCGCAGCATCCTCCGCATTAGCTGCTAGCAAAAAAAAAAAAAAAGCAAGCGGTGTGAGCAAGGGCGAGGAGGATAACATGGCCATCATCAAGGAGTTCATGCGCTTCAAGGTGCACATGGAGGGCTCCGTGAACGGC
ATGAGATTTCCTTCAATTTTTACTGCTGTTTTATTCGCAGCATCCTCCGCATTAGgCTGCTAGC---------------GCtctagtggttgtggcAAGCGGTGTGAGCAAGGGCGAGGAGGATAACATGGCCATCATCAAGGAGTTCATGCGCTTCAAGGTGCACATGGAGGGCTCCGTGAACGGC	1	36	Insertion and Deletion	0	1		21	MRFPSIFTAVLFAASSALGC*											MRFPSIFTAVLFAASSALAASKKKKKASGVSKGEEDNMAIIKEFMRFKVHMEGSVNG	ATGAGATTTCCTTCAATTTTTACTGCTGTTTTATTCGCAGCATCCTCCGCATTAGGCTGCTAGC---------------GCTCTAGTGGTTGTGGCAAGCGGTGTGAGCAAGGGCGAGGAGGATAACATGGCCATCATCAAGGAGTTCATGCGCTTCAAGGTGCACATGGAGGGCTCCGTGAACGGC	ATGAGATTTCCTTCAATTTTTACTGCTGTTTTATTCGCAGCATCCTCCGCATTAGCTGCTAGCAAAAAAAAAAAAAAAGCAAGCGGTGTGAGCAAGGGCGAGGAGGATAACATGGCCATCATCAAGGAGTTCATGCGCTTCAAGGTGCACATGGAGGGCTCCGTGAACGGC
ATGAGATTTCCTTCAATTTTTACTGCTGTTTTATTCGCAGCATCCTCCGCATTAGgCTGCTAGC---------------GGgggtttagctgtggcAAGCGGTGTGAGCAAGGGCGAGGAGGATAACATGGCCATCATCAAGGAGTTCATGCGCTTCAAGGTGCACATGGAGGGCTCCGTGAACGGC	1	35	Insertion and Deletion	0	1		21	MRFPSIFTAVLFAASSALGC*											MRFPSIFTAVLFAASSALAASKKKKKASGVSKGEEDNMAIIKEFMRFKVHMEGSVNG	ATGAGATTTCCTTCAATTTTTACTGCTGTTTTATTCGCAGCATCCTCCGCATTAGGCTGCTAGC---------------GGGGGTTTAGCTGTGGCAAGCGGTGTGAGCAAGGGCGAGGAGGATAACATGGCCATCATCAAGGAGTTCATGCGCTTCAAGGTGCACATGGAGGGCTCCGTGAACGGC	ATGAGATTTCCTTCAATTTTTACTGCTGTTTTATTCGCAGCATCCTCCGCATTAGCTGCTAGCAAAAAAAAAAAAAAAGCAAGCGGTGTGAGCAAGGGCGAGGAGGATAACATGGCCATCATCAAGGAGTTCATGCGCTTCAAGGTGCACATGGAGGGCTCCGTGAACGGC
ATGAGATTTCCTTCAATTTTTACTGCTGTTTTATTCGCAGCATCCTCCGCATTAGgCTGCTAGC---------------GGgtttacgtggatggcAAGCGGTGTGAGCAAGGGCGAGGAGGATAACATGGCCATCATCAAGGAGTTCATGCGCTTCAAGGTGCACATGGAGGGCTCCGTGAACGGC	1	35	Insertion and Deletion	0	1		21	MRFPSIFTAVLFAASSALGC*											MRFPSIFTAVLFAASSALAASKKKKKASGVSKGEEDNMAIIKEFMRFKVHMEGSVNG	ATGAGATTTCCTTCAATTTTTACTGCTGTTTTATTCGCAGCATCCTCCGCATTAGGCTGCTAGC---------------GGGTTTACGTGGATGGCAAGCGGTGTGAGCAAGGGCGAGGAGGATAACATGGCCATCATCAAGGAGTTCATGCGCTTCAAGGTGCACATGGAGGGCTCCGTGAACGGC	ATGAGATTTCCTTCAATTTTTACTGCTGTTTTATTCGCAGCATCCTCCGCATTAGCTGCTAGCAAAAAAAAAAAAAAAGCAAGCGGTGTGAGCAAGGGCGAGGAGGATAACATGGCCATCATCAAGGAGTTCATGCGCTTCAAGGTGCACATGGAGGGCTCCGTGAACGGC
ATGAGATTTCCTTCAATTTTTACTGCTGTTTTATTCGCAGCATCCTCCGCATTAGgCTGCTAGC---------------GGtgggcgatggtttgcAAGCGGTGTGAGCAAGGGCGAGGAGGATAACATGGCCATCATCAAGGAGTTCATGCGCTTCAAGGTGCACATGGAGGGCTCCGTGAACGGC	1	35	Insertion and Deletion	0	1		21	MRFPSIFTAVLFAASSALGC*											MRFPSIFTAVLFAASSALAASKKKKKASGVSKGEEDNMAIIKEFMRFKVHMEGSVNG	ATGAGATTTCCTTCAATTTTTACTGCTGTTTTATTCGCAGCATCCTCCGCATTAGGCTGCTAGC---------------GGTGGGCGATGGTTTGCAAGCGGTGTGAGCAAGGGCGAGGAGGATAACATGGCCATCATCAAGGAGTTCATGCGCTTCAAGGTGCACATGGAGGGCTCCGTGAACGGC	ATGAGATTTCCTTCAATTTTTACTGCTGTTTTATTCGCAGCATCCTCCGCATTAGCTGCTAGCAAAAAAAAAAAAAAAGCAAGCGGTGTGAGCAAGGGCGAGGAGGATAACATGGCCATCATCAAGGAGTTCATGCGCTTCAAGGTGCACATGGAGGGCTCCGTGAACGGC
ATGAGATTTCCTTCAATTTTTACTGCTGTTTTATTCGCAGCATCCTCCGCATTAGgCTGCTAGC---------------GTtagactgtgcccggcAAGCGGTGTGAGCAAGGGCGAGGAGGATAACATGGCCATCATCAAGGAGTTCATGCGCTTCAAGGTGCACATGGAGGGCTCCGTGAACGGC	1	33	Insertion and Deletion	0	1		21	MRFPSIFTAVLFAASSALGC*											MRFPSIFTAVLFAASSALAASKKKKKASGVSKGEEDNMAIIKEFMRFKVHMEGSVNG	ATGAGATTTCCTTCAATTTTTACTGCTGTTTTATTCGCAGCATCCTCCGCATTAGGCTGCTAGC---------------GTTAGACTGTGCCCGGCAAGCGGTGTGAGCAAGGGCGAGGAGGATAACATGGCCATCATCAAGGAGTTCATGCGCTTCAAGGTGCACATGGAGGGCTCCGTGAACGGC	ATGAGATTTCCTTCAATTTTTACTGCTGTTTTATTCGCAGCATCCTCCGCATTAGCTGCTAGCAAAAAAAAAAAAAAAGCAAGCGGTGTGAGCAAGGGCGAGGAGGATAACATGGCCATCATCAAGGAGTTCATGCGCTTCAAGGTGCACATGGAGGGCTCCGTGAACGGC
ATGAGATTTCCTTCAATTTTTACTGCTGTTTTATTCGCAGCATCCTCCGCATTAGgCTGCTAGC---------------GTtcggtcattctcggcAAGCGGTGTGAGCAAGGGCGAGGAGGATAACATGGCCATCATCAAGGAGTTCATGCGCTTCAAGGTGCACATGGAGGGCTCCGTGAACGGC	1	36	Insertion and Deletion	0	1		21	MRFPSIFTAVLFAASSALGC*											MRFPSIFTAVLFAASSALAASKKKKKASGVSKGEEDNMAIIKEFMRFKVHMEGSVNG	ATGAGATTTCCTTCAATTTTTACTGCTGTTTTATTCGCAGCATCCTCCGCATTAGGCTGCTAGC---------------GTTCGGTCATTCTCGGCAAGCGGTGTGAGCAAGGGCGAGGAGGATAACATGGCCATCATCAAGGAGTTCATGCGCTTCAAGGTGCACATGGAGGGCTCCGTGAACGGC	ATGAGATTTCCTTCAATTTTTACTGCTGTTTTATTCGCAGCATCCTCCGCATTAGCTGCTAGCAAAAAAAAAAAAAAAGCAAGCGGTGTGAGCAAGGGCGAGGAGGATAACATGGCCATCATCAAGGAGTTCATGCGCTTCAAGGTGCACATGGAGGGCTCCGTGAACGGC
ATGAGATTTCCTTCAATTTTTACTGCTGTTTTATTCGCAGCATCCTCCGCATTAGgCTGCTAGC---------------GTtgttcgtcttagggcAAGCGGTGTGAGCAAGGGCGAGGAGGATAACATGGCCATCATCAAGGAGTTCATGCGCTTCAAGGTGCACATGGAGGGCTCCGTGAACGGC	1	33	Insertion and Deletion	0	1		21	MRFPSIFTAVLFAASSALGC*											MRFPSIFTAVLFAASSALAASKKKKKASGVSKGEEDNMAIIKEFMRFKVHMEGSVNG	ATGAGATTTCCTTCAATTTTTACTGCTGTTTTATTCGCAGCATCCTCCGCATTAGGCTGCTAGC---------------GTTGTTCGTCTTAGGGCAAGCGGTGTGAGCAAGGGCGAGGAGGATAACATGGCCATCATCAAGGAGTTCATGCGCTTCAAGGTGCACATGGAGGGCTCCGTGAACGGC	ATGAGATTTCCTTCAATTTTTACTGCTGTTTTATTCGCAGCATCCTCCGCATTAGCTGCTAGCAAAAAAAAAAAAAAAGCAAGCGGTGTGAGCAAGGGCGAGGAGGATAACATGGCCATCATCAAGGAGTTCATGCGCTTCAAGGTGCACATGGAGGGCTCCGTGAACGGC
ATGAGATTTCCTTCAATTTTTACTGCTGTTTTATTCGCAGCATCCTCCGCATTAGgCTGCTAGC--------------ACgtggtcgcgggggCAAGCGGTGTGAGCAAGGGCGAGGAGGATAACATGGCCATCATCAAGGAGTTCATGCGCTTCAAGGTGCACATGGAGGGCTCCGTGAACGGC	1	35	Insertion and Deletion	0	0		21	MRFPSIFTAVLFAASSALGC*											MRFPSIFTAVLFAASSALAASKKKKKASGVSKGEEDNMAIIKEFMRFKVHMEGSVNG	ATGAGATTTCCTTCAATTTTTACTGCTGTTTTATTCGCAGCATCCTCCGCATTAGGCTGCTAGC--------------ACGTGGTCGCGGGGGCAAGCGGTGTGAGCAAGGGCGAGGAGGATAACATGGCCATCATCAAGGAGTTCATGCGCTTCAAGGTGCACATGGAGGGCTCCGTGAACGGC	ATGAGATTTCCTTCAATTTTTACTGCTGTTTTATTCGCAGCATCCTCCGCATTAGCTGCTAGCAAAAAAAAAAAAAAAGCAAGCGGTGTGAGCAAGGGCGAGGAGGATAACATGGCCATCATCAAGGAGTTCATGCGCTTCAAGGTGCACATGGAGGGCTCCGTGAACGGC
ATGAGATTTCCTTCAATTTTTACTGCTGTTTTATTCGCAGCATCCTCCGCATTAGgCTGCTAGC--------------ACtcagggtacgagtgCAAGCGGTGTGAGCAAGGGCGAGGAGGATAACATGGCCATCATCAAGGAGTTCATGCGCTTCAAGGTGCACATGGAGGGCTCCGTGAACGGC	1	36	Insertion and Deletion	0	1		21	MRFPSIFTAVLFAASSALGC*											MRFPSIFTAVLFAASSALAASKKKKKASGVSKGEEDNMAIIKEFMRFKVHMEGSVNG	ATGAGATTTCCTTCAATTTTTACTGCTGTTTTATTCGCAGCATCCTCCGCATTAGGCTGCTAGC--------------ACTCAGGGTACGAGTGCAAGCGGTGTGAGCAAGGGCGAGGAGGATAACATGGCCATCATCAAGGAGTTCATGCGCTTCAAGGTGCACATGGAGGGCTCCGTGAACGGC	ATGAGATTTCCTTCAATTTTTACTGCTGTTTTATTCGCAGCATCCTCCGCATTAGCTGCTAGCAAAAAAAAAAAAAAAGCAAGCGGTGTGAGCAAGGGCGAGGAGGATAACATGGCCATCATCAAGGAGTTCATGCGCTTCAAGGTGCACATGGAGGGCTCCGTGAACGGC
ATGAGATTTCCTTCAATTTTTACTGCTGTTTTATTCGCAGCATCCTCCGCATTAGgCTGCTAGC--------------AGggacacgttatttgCAAGCGGTGTGAGCAAGGGCGAGGAGGATAACATGGCCATCATCAAGGAGTTCATGCGCTTCAAGGTGCACATGGAGGGCTCCGTGAACGGC	1	35	Insertion and Deletion	0	1		21	MRFPSIFTAVLFAASSALGC*											MRFPSIFTAVLFAASSALAASKKKKKASGVSKGEEDNMAIIKEFMRFKVHMEGSVNG	ATGAGATTTCCTTCAATTTTTACTGCTGTTTTATTCGCAGCATCCTCCGCATTAGGCTGCTAGC--------------AGGGACACGTTATTTGCAAGCGGTGTGAGCAAGGGCGAGGAGGATAACATGGCCATCATCAAGGAGTTCATGCGCTTCAAGGTGCACATGGAGGGCTCCGTGAACGGC	ATGAGATTTCCTTCAATTTTTACTGCTGTTTTATTCGCAGCATCCTCCGCATTAGCTGCTAGCAAAAAAAAAAAAAAAGCAAGCGGTGTGAGCAAGGGCGAGGAGGATAACATGGCCATCATCAAGGAGTTCATGCGCTTCAAGGTGCACATGGAGGGCTCCGTGAACGGC
ATGAGATTTCCTTCAATTTTTACTGCTGTTTTATTCGCAGCATCCTCCGCATTAGgCTGCTAGC--------------AGtggatcatctgccgCAAGCGGTGTGAGCAAGGGCGAGGAGGATAACATGGCCATCATCAAGGAGTTCATGCGCTTCAAGGTGCACATGGAGGGCTCCGTGAACGGC	1	33	Insertion and Deletion	0	1		21	MRFPSIFTAVLFAASSALGC*											MRFPSIFTAVLFAASSALAASKKKKKASGVSKGEEDNMAIIKEFMRFKVHMEGSVNG	ATGAGATTTCCTTCAATTTTTACTGCTGTTTTATTCGCAGCATCCTCCGCATTAGGCTGCTAGC--------------AGTGGATCATCTGCCGCAAGCGGTGTGAGCAAGGGCGAGGAGGATAACATGGCCATCATCAAGGAGTTCATGCGCTTCAAGGTGCACATGGAGGGCTCCGTGAACGGC	ATGAGATTTCCTTCAATTTTTACTGCTGTTTTATTCGCAGCATCCTCCGCATTAGCTGCTAGCAAAAAAAAAAAAAAAGCAAGCGGTGTGAGCAAGGGCGAGGAGGATAACATGGCCATCATCAAGGAGTTCATGCGCTTCAAGGTGCACATGGAGGGCTCCGTGAACGGC
ATGAGATTTCCTTCAATTTTTACTGCTGTTTTATTCGCAGCATCCTCCGCATTAGgCTGCTAGC--------------AGtggcagtacgtttgCAAGCGGTGTGAGCAAGGGCGAGGAGGATAACATGGCCATCATCAAGGAGTTCATGCGCTTCAAGGTGCACATGGAGGGCTCCGTGAACGGC	1	35	Insertion and Deletion	0	1		21	MRFPSIFTAVLFAASSALGC*											MRFPSIFTAVLFAASSALAASKKKKKASGVSKGEEDNMAIIKEFMRFKVHMEGSVNG	ATGAGATTTCCTTCAATTTTTACTGCTGTTTTATTCGCAGCATCCTCCGCATTAGGCTGCTAGC--------------AGTGGCAGTACGTTTGCAAGCGGTGTGAGCAAGGGCGAGGAGGATAACATGGCCATCATCAAGGAGTTCATGCGCTTCAAGGTGCACATGGAGGGCTCCGTGAACGGC	ATGAGATTTCCTTCAATTTTTACTGCTGTTTTATTCGCAGCATCCTCCGCATTAGCTGCTAGCAAAAAAAAAAAAAAAGCAAGCGGTGTGAGCAAGGGCGAGGAGGATAACATGGCCATCATCAAGGAGTTCATGCGCTTCAAGGTGCACATGGAGGGCTCCGTGAACGGC
ATGAGATTTCCTTCAATTTTTACTGCTGTTTTATTCGCAGCATCCTCCGCATTAGgCTGCTAGC--------------ATcgagacattttgcgCAAGCGGTGTGAGCAAGGGCGAGGAGGATAACATGGCCATCATCAAGGAGTTCATGCGCTTCAAGGTGCACATGGAGGGCTCCGTGAACGGC	1	36	Insertion and Deletion	0	1		21	MRFPSIFTAVLFAASSALGC*											MRFPSIFTAVLFAASSALAASKKKKKASGVSKGEEDNMAIIKEFMRFKVHMEGSVNG	ATGAGATTTCCTTCAATTTTTACTGCTGTTTTATTCGCAGCATCCTCCGCATTAGGCTGCTAGC--------------ATCGAGACATTTTGCGCAAGCGGTGTGAGCAAGGGCGAGGAGGATAACATGGCCATCATCAAGGAGTTCATGCGCTTCAAGGTGCACATGGAGGGCTCCGTGAACGGC	ATGAGATTTCCTTCAATTTTTACTGCTGTTTTATTCGCAGCATCCTCCGCATTAGCTGCTAGCAAAAAAAAAAAAAAAGCAAGCGGTGTGAGCAAGGGCGAGGAGGATAACATGGCCATCATCAAGGAGTTCATGCGCTTCAAGGTGCACATGGAGGGCTCCGTGAACGGC
ATGAGATTTCCTTCAATTTTTACTGCTGTTTTATTCGCAGCATCCTCCGCATTAGgCTGCTAGC-------------ACgtggcagacttcaGCAAGCGGTGTGAGCAAGGGCGAGGAGGATAACATGGCCATCATCAAGGAGTTCATGCGCTTCAAGGTGCACATGGAGGGCTCCGTGAACGGC	1	36	Insertion and Deletion	0	1		21	MRFPSIFTAVLFAASSALGC*											MRFPSIFTAVLFAASSALAASKKKKKASGVSKGEEDNMAIIKEFMRFKVHMEGSVNG	ATGAGATTTCCTTCAATTTTTACTGCTGTTTTATTCGCAGCATCCTCCGCATTAGGCTGCTAGC-------------ACGTGGCAGACTTCAGCAAGCGGTGTGAGCAAGGGCGAGGAGGATAACATGGCCATCATCAAGGAGTTCATGCGCTTCAAGGTGCACATGGAGGGCTCCGTGAACGGC	ATGAGATTTCCTTCAATTTTTACTGCTGTTTTATTCGCAGCATCCTCCGCATTAGCTGCTAGCAAAAAAAAAAAAAAAGCAAGCGGTGTGAGCAAGGGCGAGGAGGATAACATGGCCATCATCAAGGAGTTCATGCGCTTCAAGGTGCACATGGAGGGCTCCGTGAACGGC
ATGAGATTTCCTTCAATTTTTACTGCTGTTTTATTCGCAGCATCCTCCGCATTAGgCTGCTAGC-------------GATgctgtattgtgggCAAGCGGTGTGAGCAAGGGCGAGGAGGATAACATGGCCATCATCAAGGAGTTCATGCGCTTCAAGGTGCACATGGAGGGCTCCGTGAACGGC	1	35	Insertion and Deletion	0	1		21	MRFPSIFTAVLFAASSALGC*											MRFPSIFTAVLFAASSALAASKKKKKASGVSKGEEDNMAIIKEFMRFKVHMEGSVNG	ATGAGATTTCCTTCAATTTTTACTGCTGTTTTATTCGCAGCATCCTCCGCATTAGGCTGCTAGC-------------GATGCTGTATTGTGGGCAAGCGGTGTGAGCAAGGGCGAGGAGGATAACATGGCCATCATCAAGGAGTTCATGCGCTTCAAGGTGCACATGGAGGGCTCCGTGAACGGC	ATGAGATTTCCTTCAATTTTTACTGCTGTTTTATTCGCAGCATCCTCCGCATTAGCTGCTAGCAAAAAAAAAAAAAAAGCAAGCGGTGTGAGCAAGGGCGAGGAGGATAACATGGCCATCATCAAGGAGTTCATGCGCTTCAAGGTGCACATGGAGGGCTCCGTGAACGGC
ATGAGATTTCCTTCAATTTTTACTGCTGTTTTATTCGCAGCATCCTCCGCATTAGgCTGCTAGC-------------TATcaggtggctgccgCAAGCGGTGTGAGCAAGGGCGAGGAGGATAACATGGCCATCATCAAGGAGTTCATGCGCTTCAAGGTGCACATGGAGGGCTCCGTGAACGGC	1	34	Insertion and Deletion	0	1		21	MRFPSIFTAVLFAASSALGC*											MRFPSIFTAVLFAASSALAASKKKKKASGVSKGEEDNMAIIKEFMRFKVHMEGSVNG	ATGAGATTTCCTTCAATTTTTACTGCTGTTTTATTCGCAGCATCCTCCGCATTAGGCTGCTAGC-------------TATCAGGTGGCTGCCGCAAGCGGTGTGAGCAAGGGCGAGGAGGATAACATGGCCATCATCAAGGAGTTCATGCGCTTCAAGGTGCACATGGAGGGCTCCGTGAACGGC	ATGAGATTTCCTTCAATTTTTACTGCTGTTTTATTCGCAGCATCCTCCGCATTAGCTGCTAGCAAAAAAAAAAAAAAAGCAAGCGGTGTGAGCAAGGGCGAGGAGGATAACATGGCCATCATCAAGGAGTTCATGCGCTTCAAGGTGCACATGGAGGGCTCCGTGAACGGC
ATGAGATTTCCTTCAATTTTTACTGCTGTTTTATTCGCAGCATCCTCCGCATTAGgCTGCTAGC------------ACAGtttccggatttgCAAGCGGTGTGAGCAAGGGCGAGGAGGATAACATGGCCATCATCAAGGAGTTCATGCGCTTCAAGGTGCACATGGAGGGCTCCGTGAACGGC	1	26	Insertion and Deletion	0	1		21	MRFPSIFTAVLFAASSALGC*											MRFPSIFTAVLFAASSALAASKKKKKASGVSKGEEDNMAIIKEFMRFKVHMEGSVNG	ATGAGATTTCCTTCAATTTTTACTGCTGTTTTATTCGCAGCATCCTCCGCATTAGGCTGCTAGC------------ACAGTTTCCGGATTTGCAAGCGGTGTGAGCAAGGGCGAGGAGGATAACATGGCCATCATCAAGGAGTTCATGCGCTTCAAGGTGCACATGGAGGGCTCCGTGAACGGC	ATGAGATTTCCTTCAATTTTTACTGCTGTTTTATTCGCAGCATCCTCCGCATTAGCTGCTAGCAAAAAAAAAAAAAAAGCAAGCGGTGTGAGCAAGGGCGAGGAGGATAACATGGCCATCATCAAGGAGTTCATGCGCTTCAAGGTGCACATGGAGGGCTCCGTGAACGGC
ATGAGATTTCCTTCAATTTTTACTGCTGTTTTATTCGCAGCATCCTCCGCATTAGgCTGCTAGC------------ATtgcgtgggaggaGGCAAGCGGTGTGAGCAAGGGCGAGGAGGATAACATGGCCATCATCAAGGAGTTCATGCGCTTCAAGGTGCACATGGAGGGCTCCGTGAACGGC	1	32	Insertion and Deletion	0	1		21	MRFPSIFTAVLFAASSALGC*											MRFPSIFTAVLFAASSALAASKKKKKASGVSKGEEDNMAIIKEFMRFKVHMEGSVNG	ATGAGATTTCCTTCAATTTTTACTGCTGTTTTATTCGCAGCATCCTCCGCATTAGGCTGCTAGC------------ATTGCGTGGGAGGAGGCAAGCGGTGTGAGCAAGGGCGAGGAGGATAACATGGCCATCATCAAGGAGTTCATGCGCTTCAAGGTGCACATGGAGGGCTCCGTGAACGGC	ATGAGATTTCCTTCAATTTTTACTGCTGTTTTATTCGCAGCATCCTCCGCATTAGCTGCTAGCAAAAAAAAAAAAAAAGCAAGCGGTGTGAGCAAGGGCGAGGAGGATAACATGGCCATCATCAAGGAGTTCATGCGCTTCAAGGTGCACATGGAGGGCTCCGTGAACGGC
ATGAGATTTCCTTCAATTTTTACTGCTGTTTTATTCGCAGCATCCTCCGCATTAGgCTGCTAGC------------CTATttttttctcttgCAAGCGGTGTGAGCAAGGGCGAGGAGGATAACATGGCCATCATCAAGGAGTTCATGCGCTTCAAGGTGCACATGGAGGGCTCCGTGAACGGC	1	24	Insertion and Deletion	0	1		21	MRFPSIFTAVLFAASSALGC*											MRFPSIFTAVLFAASSALAASKKKKKASGVSKGEEDNMAIIKEFMRFKVHMEGSVNG	ATGAGATTTCCTTCAATTTTTACTGCTGTTTTATTCGCAGCATCCTCCGCATTAGGCTGCTAGC------------CTATTTTTTTCTCTTGCAAGCGGTGTGAGCAAGGGCGAGGAGGATAACATGGCCATCATCAAGGAGTTCATGCGCTTCAAGGTGCACATGGAGGGCTCCGTGAACGGC	ATGAGATTTCCTTCAATTTTTACTGCTGTTTTATTCGCAGCATCCTCCGCATTAGCTGCTAGCAAAAAAAAAAAAAAAGCAAGCGGTGTGAGCAAGGGCGAGGAGGATAACATGGCCATCATCAAGGAGTTCATGCGCTTCAAGGTGCACATGGAGGGCTCCGTGAACGGC
ATGAGATTTCCTTCAATTTTTACTGCTGTTTTATTCGCAGCATCCTCCGCATTAGgCTGCTAGC-----------CATgcgtcgtctcaTGCAAGCGGTGTGAGCAAGGGCGAGGAGGATAACATGGCCATCATCAAGGAGTTCATGCGCTTCAAGGTGCACATGGAGGGCTCCGTGAACGGC	1	34	Insertion and Deletion	0	1		21	MRFPSIFTAVLFAASSALGC*											MRFPSIFTAVLFAASSALAASKKKKKASGVSKGEEDNMAIIKEFMRFKVHMEGSVNG	ATGAGATTTCCTTCAATTTTTACTGCTGTTTTATTCGCAGCATCCTCCGCATTAGGCTGCTAGC-----------CATGCGTCGTCTCATGCAAGCGGTGTGAGCAAGGGCGAGGAGGATAACATGGCCATCATCAAGGAGTTCATGCGCTTCAAGGTGCACATGGAGGGCTCCGTGAACGGC	ATGAGATTTCCTTCAATTTTTACTGCTGTTTTATTCGCAGCATCCTCCGCATTAGCTGCTAGCAAAAAAAAAAAAAAAGCAAGCGGTGTGAGCAAGGGCGAGGAGGATAACATGGCCATCATCAAGGAGTTCATGCGCTTCAAGGTGCACATGGAGGGCTCCGTGAACGGC
ATGAGATTTCCTTCAATTTTTACTGCTGTTTTATTCGCAGCATCCTCCGCATTAGgCTGCTAGC-----------TAAAGgctgtgaggggCAAGCGGTGTGAGCAAGGGCGAGGAGGATAACATGGCCATCATCAAGGAGTTCATGCGCTTCAAGGTGCACATGGAGGGCTCCGTGAACGGC	1	35	Insertion and Deletion	0	1		21	MRFPSIFTAVLFAASSALGC*											MRFPSIFTAVLFAASSALAASKKKKKASGVSKGEEDNMAIIKEFMRFKVHMEGSVNG	ATGAGATTTCCTTCAATTTTTACTGCTGTTTTATTCGCAGCATCCTCCGCATTAGGCTGCTAGC-----------TAAAGGCTGTGAGGGGCAAGCGGTGTGAGCAAGGGCGAGGAGGATAACATGGCCATCATCAAGGAGTTCATGCGCTTCAAGGTGCACATGGAGGGCTCCGTGAACGGC	ATGAGATTTCCTTCAATTTTTACTGCTGTTTTATTCGCAGCATCCTCCGCATTAGCTGCTAGCAAAAAAAAAAAAAAAGCAAGCGGTGTGAGCAAGGGCGAGGAGGATAACATGGCCATCATCAAGGAGTTCATGCGCTTCAAGGTGCACATGGAGGGCTCCGTGAACGGC
ATGAGATTTCCTTCAATTTTTACTGCTGTTTTATTCGCAGCATCCTCCGCATTAGgCTGCTAGC----------AAACAGcctctgagggCAAGCGGTGTGAGCAAGGGCGAGGAGGATAACATGGCCATCATCAAGGAGTTCATGCGCTTCAAGGTGCACATGGAGGGCTCCGTGAACGGC	1	36	Insertion and Deletion	0	1		21	MRFPSIFTAVLFAASSALGC*											MRFPSIFTAVLFAASSALAASKKKKKASGVSKGEEDNMAIIKEFMRFKVHMEGSVNG	ATGAGATTTCCTTCAATTTTTACTGCTGTTTTATTCGCAGCATCCTCCGCATTAGGCTGCTAGC----------AAACAGCCTCTGAGGGCAAGCGGTGTGAGCAAGGGCGAGGAGGATAACATGGCCATCATCAAGGAGTTCATGCGCTTCAAGGTGCACATGGAGGGCTCCGTGAACGGC	ATGAGATTTCCTTCAATTTTTACTGCTGTTTTATTCGCAGCATCCTCCGCATTAGCTGCTAGCAAAAAAAAAAAAAAAGCAAGCGGTGTGAGCAAGGGCGAGGAGGATAACATGGCCATCATCAAGGAGTTCATGCGCTTCAAGGTGCACATGGAGGGCTCCGTGAACGGC
ATGAGATTTCCTTCAATTTTTACTGCTGTTTTATTCGCAGCATCCTCCGCATTAGgCTGCTAGC----------AGccggcgggcaAGTGCAAGCGGTGTGAGCAAGGGCGAGGAGGATAACATGGCCATCATCAAGGAGTTCATGCGCTTCAAGGTGCACATGGAGGGCTCCGTGAACGGC	1	36	Insertion and Deletion	0	1		21	MRFPSIFTAVLFAASSALGC*											MRFPSIFTAVLFAASSALAASKKKKKASGVSKGEEDNMAIIKEFMRFKVHMEGSVNG	ATGAGATTTCCTTCAATTTTTACTGCTGTTTTATTCGCAGCATCCTCCGCATTAGGCTGCTAGC----------AGCCGGCGGGCAAGTGCAAGCGGTGTGAGCAAGGGCGAGGAGGATAACATGGCCATCATCAAGGAGTTCATGCGCTTCAAGGTGCACATGGAGGGCTCCGTGAACGGC	ATGAGATTTCCTTCAATTTTTACTGCTGTTTTATTCGCAGCATCCTCCGCATTAGCTGCTAGCAAAAAAAAAAAAAAAGCAAGCGGTGTGAGCAAGGGCGAGGAGGATAACATGGCCATCATCAAGGAGTTCATGCGCTTCAAGGTGCACATGGAGGGCTCCGTGAACGGC
ATGAGATTTCCTTCAATTTTTACTGCTGTTTTATTCGCAGCATCCTCCGCATTAGgCTGCTAGC----------CAATtgttaAGccttgCAAGCGGTGTGAGCAAGGGCGAGGAGGATAACATGGCCATCATCAAGGAGTTCATGCGCTTCAAGGTGCACATGGAGGGCTCCGTGAACGGC	1	36	Insertion and Deletion	0	1		21	MRFPSIFTAVLFAASSALGC*											MRFPSIFTAVLFAASSALAASKKKKKASGVSKGEEDNMAIIKEFMRFKVHMEGSVNG	ATGAGATTTCCTTCAATTTTTACTGCTGTTTTATTCGCAGCATCCTCCGCATTAGGCTGCTAGC----------CAATTGTTAAGCCTTGCAAGCGGTGTGAGCAAGGGCGAGGAGGATAACATGGCCATCATCAAGGAGTTCATGCGCTTCAAGGTGCACATGGAGGGCTCCGTGAACGGC	ATGAGATTTCCTTCAATTTTTACTGCTGTTTTATTCGCAGCATCCTCCGCATTAGCTGCTAGCAAAAAAAAAAAAAAAGCAAGCGGTGTGAGCAAGGGCGAGGAGGATAACATGGCCATCATCAAGGAGTTCATGCGCTTCAAGGTGCACATGGAGGGCTCCGTGAACGGC
ATGAGATTTCCTTCAATTTTTACTGCTGTTTTATTCGCAGCATCCTCCGCATTAGgCTGCTAGC----------GCATACcctgacgttgCAAGCGGTGTGAGCAAGGGCGAGGAGGATAACATGGCCATCATCAAGGAGTTCATGCGCTTCAAGGTGCACATGGAGGGCTCCGTGAACGGC	1	35	Insertion and Deletion	0	1		21	MRFPSIFTAVLFAASSALGC*											MRFPSIFTAVLFAASSALAASKKKKKASGVSKGEEDNMAIIKEFMRFKVHMEGSVNG	ATGAGATTTCCTTCAATTTTTACTGCTGTTTTATTCGCAGCATCCTCCGCATTAGGCTGCTAGC----------GCATACCCTGACGTTGCAAGCGGTGTGAGCAAGGGCGAGGAGGATAACATGGCCATCATCAAGGAGTTCATGCGCTTCAAGGTGCACATGGAGGGCTCCGTGAACGGC	ATGAGATTTCCTTCAATTTTTACTGCTGTTTTATTCGCAGCATCCTCCGCATTAGCTGCTAGCAAAAAAAAAAAAAAAGCAAGCGGTGTGAGCAAGGGCGAGGAGGATAACATGGCCATCATCAAGGAGTTCATGCGCTTCAAGGTGCACATGGAGGGCTCCGTGAACGGC
ATGAGATTTCCTTCAATTTTTACTGCTGTTTTATTCGCAGCATCCTCCGCATTAGgCTGCTAGC----------GTTAAGtgtcggcgggCAAGCGGTGTGAGCAAGGGCGAGGAGGATAACATGGCCATCATCAAGGAGTTCATGCGCTTCAAGGTGCACATGGAGGGCTCCGTGAACGGC	1	34	Insertion and Deletion	0	1		21	MRFPSIFTAVLFAASSALGC*											MRFPSIFTAVLFAASSALAASKKKKKASGVSKGEEDNMAIIKEFMRFKVHMEGSVNG	ATGAGATTTCCTTCAATTTTTACTGCTGTTTTATTCGCAGCATCCTCCGCATTAGGCTGCTAGC----------GTTAAGTGTCGGCGGGCAAGCGGTGTGAGCAAGGGCGAGGAGGATAACATGGCCATCATCAAGGAGTTCATGCGCTTCAAGGTGCACATGGAGGGCTCCGTGAACGGC	ATGAGATTTCCTTCAATTTTTACTGCTGTTTTATTCGCAGCATCCTCCGCATTAGCTGCTAGCAAAAAAAAAAAAAAAGCAAGCGGTGTGAGCAAGGGCGAGGAGGATAACATGGCCATCATCAAGGAGTTCATGCGCTTCAAGGTGCACATGGAGGGCTCCGTGAACGGC
ATGAGATTTCCTTCAATTTTTACTGCTGTTTTATTCGCAGCATCCTCCGCATTAGgCTGCTAGC---------TTAAGgggatttgaTGCAAGCGGTGTGAGCAAGGGCGAGGAGGATAACATGGCCATCATCAAGGAGTTCATGCGCTTCAAGGTGCACATGGAGGGCTCCGTGAACGGC	1	35	Insertion and Deletion	0	1		21	MRFPSIFTAVLFAASSALGC*											MRFPSIFTAVLFAASSALAASKKKKKASGVSKGEEDNMAIIKEFMRFKVHMEGSVNG	ATGAGATTTCCTTCAATTTTTACTGCTGTTTTATTCGCAGCATCCTCCGCATTAGGCTGCTAGC---------TTAAGGGGATTTGATGCAAGCGGTGTGAGCAAGGGCGAGGAGGATAACATGGCCATCATCAAGGAGTTCATGCGCTTCAAGGTGCACATGGAGGGCTCCGTGAACGGC	ATGAGATTTCCTTCAATTTTTACTGCTGTTTTATTCGCAGCATCCTCCGCATTAGCTGCTAGCAAAAAAAAAAAAAAAGCAAGCGGTGTGAGCAAGGGCGAGGAGGATAACATGGCCATCATCAAGGAGTTCATGCGCTTCAAGGTGCACATGGAGGGCTCCGTGAACGGC
ATGAGATTTCCTTCAATTTTTACTGCTGTTTTATTCGCAGCATCCTCCGCATTAGgCTGCTAGC--------AAGcttttttaATACGCAAGCGGTGTGAGCAAGGGCGAGGAGGATAACATGGCCATCATCAAGGAGTTCATGCGCTTCAAGGTGCACATGGAGGGCTCCGTGAACGGC	1	35	Insertion and Deletion	0	1		21	MRFPSIFTAVLFAASSALGC*											MRFPSIFTAVLFAASSALAASKKKKKASGVSKGEEDNMAIIKEFMRFKVHMEGSVNG	ATGAGATTTCCTTCAATTTTTACTGCTGTTTTATTCGCAGCATCCTCCGCATTAGGCTGCTAGC--------AAGCTTTTTTAATACGCAAGCGGTGTGAGCAAGGGCGAGGAGGATAACATGGCCATCATCAAGGAGTTCATGCGCTTCAAGGTGCACATGGAGGGCTCCGTGAACGGC	ATGAGATTTCCTTCAATTTTTACTGCTGTTTTATTCGCAGCATCCTCCGCATTAGCTGCTAGCAAAAAAAAAAAAAAAGCAAGCGGTGTGAGCAAGGGCGAGGAGGATAACATGGCCATCATCAAGGAGTTCATGCGCTTCAAGGTGCACATGGAGGGCTCCGTGAACGGC
ATGAGATTTCCTTCAATTTTTACTGCTGTTTTATTCGCAGCATCCTCCGCATTAGgCTGCTAGC--------CAACATATgcccctcgCAAGCGGTGTGAGCAAGGGCGAGGAGGATAACATGGCCATCATCAAGGAGTTCATGCGCTTCAAGGTGCACATGGAGGGCTCCGTGAACGGC	1	33	Insertion and Deletion	0	1		21	MRFPSIFTAVLFAASSALGC*											MRFPSIFTAVLFAASSALAASKKKKKASGVSKGEEDNMAIIKEFMRFKVHMEGSVNG	ATGAGATTTCCTTCAATTTTTACTGCTGTTTTATTCGCAGCATCCTCCGCATTAGGCTGCTAGC--------CAACATATGCCCCTCGCAAGCGGTGTGAGCAAGGGCGAGGAGGATAACATGGCCATCATCAAGGAGTTCATGCGCTTCAAGGTGCACATGGAGGGCTCCGTGAACGGC	ATGAGATTTCCTTCAATTTTTACTGCTGTTTTATTCGCAGCATCCTCCGCATTAGCTGCTAGCAAAAAAAAAAAAAAAGCAAGCGGTGTGAGCAAGGGCGAGGAGGATAACATGGCCATCATCAAGGAGTTCATGCGCTTCAAGGTGCACATGGAGGGCTCCGTGAACGGC
ATGAGATTTCCTTCAATTTTTACTGCTGTTTTATTCGCAGCATCCTCCGCATTAGgCTGCTAGC-------GAATtggcttaAGAGGCAAGCGGTGTGAGCAAGGGCGAGGAGGATAACATGGCCATCATCAAGGAGTTCATGCGCTTCAAGGTGCACATGGAGGGCTCCGTGAACGGC	1	35	Insertion and Deletion	0	1		21	MRFPSIFTAVLFAASSALGC*											MRFPSIFTAVLFAASSALAASKKKKKASGVSKGEEDNMAIIKEFMRFKVHMEGSVNG	ATGAGATTTCCTTCAATTTTTACTGCTGTTTTATTCGCAGCATCCTCCGCATTAGGCTGCTAGC-------GAATTGGCTTAAGAGGCAAGCGGTGTGAGCAAGGGCGAGGAGGATAACATGGCCATCATCAAGGAGTTCATGCGCTTCAAGGTGCACATGGAGGGCTCCGTGAACGGC	ATGAGATTTCCTTCAATTTTTACTGCTGTTTTATTCGCAGCATCCTCCGCATTAGCTGCTAGCAAAAAAAAAAAAAAAGCAAGCGGTGTGAGCAAGGGCGAGGAGGATAACATGGCCATCATCAAGGAGTTCATGCGCTTCAAGGTGCACATGGAGGGCTCCGTGAACGGC
ATGAGATTTCCTTCAATTTTTACTGCTGTTTTATTCGCAGCATCCTCCGCATTAGgCTGCTAGC------GAAATAAAAGtcgatcgCAAGCGGTGTGAGCAAGGGCGAGGAGGATAACATGGCCATCATCAAGGAGTTCATGCGCTTCAAGGTGCACATGGAGGGCTCCGTGAACGGC	1	24	Insertion and Deletion	0	2		21	MRFPSIFTAVLFAASSALGC*											MRFPSIFTAVLFAASSALAASKKKKKASGVSKGEEDNMAIIKEFMRFKVHMEGSVNG	ATGAGATTTCCTTCAATTTTTACTGCTGTTTTATTCGCAGCATCCTCCGCATTAGGCTGCTAGC------GAAATAAAAGTCGATCGCAAGCGGTGTGAGCAAGGGCGAGGAGGATAACATGGCCATCATCAAGGAGTTCATGCGCTTCAAGGTGCACATGGAGGGCTCCGTGAACGGC	ATGAGATTTCCTTCAATTTTTACTGCTGTTTTATTCGCAGCATCCTCCGCATTAGCTGCTAGCAAAAAAAAAAAAAAAGCAAGCGGTGTGAGCAAGGGCGAGGAGGATAACATGGCCATCATCAAGGAGTTCATGCGCTTCAAGGTGCACATGGAGGGCTCCGTGAACGGC
ATGAGATTTCCTTCAATTTTTACTGCTGTTTTATTCGCAGCATCCTCCGCATTAGgCTGCTAGCAACAGCAACGAGGGTGCAAGCGGTGTGAGCAAGGGCGAGGAGGATAACATGGCCATCATCAAGGAGTTCATGCGCTTCAAGGTGCACATGGAGGGCTCCGTGAACGGC	1	34	Insertion	0	1		21	MRFPSIFTAVLFAASSALGC*											MRFPSIFTAVLFAASSALAASKKKKKASGVSKGEEDNMAIIKEFMRFKVHMEGSVNG	ATGAGATTTCCTTCAATTTTTACTGCTGTTTTATTCGCAGCATCCTCCGCATTAGGCTGCTAGCAACAGCAACGAGGGTGCAAGCGGTGTGAGCAAGGGCGAGGAGGATAACATGGCCATCATCAAGGAGTTCATGCGCTTCAAGGTGCACATGGAGGGCTCCGTGAACGGC	ATGAGATTTCCTTCAATTTTTACTGCTGTTTTATTCGCAGCATCCTCCGCATTAGCTGCTAGCAAAAAAAAAAAAAAAGCAAGCGGTGTGAGCAAGGGCGAGGAGGATAACATGGCCATCATCAAGGAGTTCATGCGCTTCAAGGTGCACATGGAGGGCTCCGTGAACGGC
ATGAGATTTCCTTCAATTTTTACTGCTGTTTTATTCGCAGCATCCTCCGCATTAGgCTGCTAGCAATACTGACAGAAATGCAAGCGGTGTGAGCAAGGGCGAGGAGGATAACATGGCCATCATCAAGGAGTTCATGCGCTTCAAGGTGCACATGGAGGGCTCCGTGAACGGC	1	36	Insertion	0	1		21	MRFPSIFTAVLFAASSALGC*											MRFPSIFTAVLFAASSALAASKKKKKASGVSKGEEDNMAIIKEFMRFKVHMEGSVNG	ATGAGATTTCCTTCAATTTTTACTGCTGTTTTATTCGCAGCATCCTCCGCATTAGGCTGCTAGCAATACTGACAGAAATGCAAGCGGTGTGAGCAAGGGCGAGGAGGATAACATGGCCATCATCAAGGAGTTCATGCGCTTCAAGGTGCACATGGAGGGCTCCGTGAACGGC	ATGAGATTTCCTTCAATTTTTACTGCTGTTTTATTCGCAGCATCCTCCGCATTAGCTGCTAGCAAAAAAAAAAAAAAAGCAAGCGGTGTGAGCAAGGGCGAGGAGGATAACATGGCCATCATCAAGGAGTTCATGCGCTTCAAGGTGCACATGGAGGGCTCCGTGAACGGC
ATGAGATTTCCTTCAATTTTTACTGCTGTTTTATTCGCAGCATCCTCCGCATTAGgCTGCTAGCAATTAGCTGAAGTAGGCAAGCGGTGTGAGCAAGGGCGAGGAGGATAACATGGCCATCATCAAGGAGTTCATGCGCTTCAAGGTGCACATGGAGGGCTCCGTGAACGGC	1	35	Insertion	0	1		21	MRFPSIFTAVLFAASSALGC*											MRFPSIFTAVLFAASSALAASKKKKKASGVSKGEEDNMAIIKEFMRFKVHMEGSVNG	ATGAGATTTCCTTCAATTTTTACTGCTGTTTTATTCGCAGCATCCTCCGCATTAGGCTGCTAGCAATTAGCTGAAGTAGGCAAGCGGTGTGAGCAAGGGCGAGGAGGATAACATGGCCATCATCAAGGAGTTCATGCGCTTCAAGGTGCACATGGAGGGCTCCGTGAACGGC	ATGAGATTTCCTTCAATTTTTACTGCTGTTTTATTCGCAGCATCCTCCGCATTAGCTGCTAGCAAAAAAAAAAAAAAAGCAAGCGGTGTGAGCAAGGGCGAGGAGGATAACATGGCCATCATCAAGGAGTTCATGCGCTTCAAGGTGCACATGGAGGGCTCCGTGAACGGC
ATGAGATTTCCTTCAATTTTTACTGCTGTTTTATTCGCAGCATCCTCCGCATTAGgCTGCTAGCACCATTTTAGTCAAGGCAAGCGGTGTGAGCAAGGGCGAGGAGGATAACATGGCCATCATCAAGGAGTTCATGCGCTTCAAGGTGCACATGGAGGGCTCCGTGAACGGC	1	36	Insertion	0	1		21	MRFPSIFTAVLFAASSALGC*											MRFPSIFTAVLFAASSALAASKKKKKASGVSKGEEDNMAIIKEFMRFKVHMEGSVNG	ATGAGATTTCCTTCAATTTTTACTGCTGTTTTATTCGCAGCATCCTCCGCATTAGGCTGCTAGCACCATTTTAGTCAAGGCAAGCGGTGTGAGCAAGGGCGAGGAGGATAACATGGCCATCATCAAGGAGTTCATGCGCTTCAAGGTGCACATGGAGGGCTCCGTGAACGGC	ATGAGATTTCCTTCAATTTTTACTGCTGTTTTATTCGCAGCATCCTCCGCATTAGCTGCTAGCAAAAAAAAAAAAAAAGCAAGCGGTGTGAGCAAGGGCGAGGAGGATAACATGGCCATCATCAAGGAGTTCATGCGCTTCAAGGTGCACATGGAGGGCTCCGTGAACGGC
ATGAGATTTCCTTCAATTTTTACTGCTGTTTTATTCGCAGCATCCTCCGCATTAGgCTGCTAGCAGtgtatctgacttcta--------------CAAGCGGTGTGAGCAAGGGCGAGGAGGATAACATGGCCATCATCAAGGAGTTCATGCGCTTCAAGGTGCACATGGAGGGCTCCGTGAACGGC	1	36	Insertion and Deletion	0	2		21	MRFPSIFTAVLFAASSALGC*											MRFPSIFTAVLFAASSALAASKKKKKASGVSKGEEDNMAIIKEFMRFKVHMEGSVNG	ATGAGATTTCCTTCAATTTTTACTGCTGTTTTATTCGCAGCATCCTCCGCATTAGGCTGCTAGCAGTGTATCTGACTTCTA--------------CAAGCGGTGTGAGCAAGGGCGAGGAGGATAACATGGCCATCATCAAGGAGTTCATGCGCTTCAAGGTGCACATGGAGGGCTCCGTGAACGGC	ATGAGATTTCCTTCAATTTTTACTGCTGTTTTATTCGCAGCATCCTCCGCATTAGCTGCTAGCAAAAAAAAAAAAAAAGCAAGCGGTGTGAGCAAGGGCGAGGAGGATAACATGGCCATCATCAAGGAGTTCATGCGCTTCAAGGTGCACATGGAGGGCTCCGTGAACGGC
ATGAGATTTCCTTCAATTTTTACTGCTGTTTTATTCGCAGCATCCTCCGCATTAGgCTGCTAGCCATCCGACTATCCATGCAAGCGGTGTGAGCAAGGGCGAGGAGGATAACATGGCCATCATCAAGGAGTTCATGCGCTTCAAGGTGCACATGGAGGGCTCCGTGAACGGC	1	23	Insertion	0	1		21	MRFPSIFTAVLFAASSALGC*											MRFPSIFTAVLFAASSALAASKKKKKASGVSKGEEDNMAIIKEFMRFKVHMEGSVNG	ATGAGATTTCCTTCAATTTTTACTGCTGTTTTATTCGCAGCATCCTCCGCATTAGGCTGCTAGCCATCCGACTATCCATGCAAGCGGTGTGAGCAAGGGCGAGGAGGATAACATGGCCATCATCAAGGAGTTCATGCGCTTCAAGGTGCACATGGAGGGCTCCGTGAACGGC	ATGAGATTTCCTTCAATTTTTACTGCTGTTTTATTCGCAGCATCCTCCGCATTAGCTGCTAGCAAAAAAAAAAAAAAAGCAAGCGGTGTGAGCAAGGGCGAGGAGGATAACATGGCCATCATCAAGGAGTTCATGCGCTTCAAGGTGCACATGGAGGGCTCCGTGAACGGC
ATGAGATTTCCTTCAATTTTTACTGCTGTTTTATTCGCAGCATCCTCCGCATTAGgCTGCTAGCCCAAGATACATGTCAGCAAGCGGTGTGAGCAAGGGCGAGGAGGATAACATGGCCATCATCAAGGAGTTCATGCGCTTCAAGGTGCACATGGAGGGCTCCGTGAACGGC	1	31	Insertion	0	1		21	MRFPSIFTAVLFAASSALGC*											MRFPSIFTAVLFAASSALAASKKKKKASGVSKGEEDNMAIIKEFMRFKVHMEGSVNG	ATGAGATTTCCTTCAATTTTTACTGCTGTTTTATTCGCAGCATCCTCCGCATTAGGCTGCTAGCCCAAGATACATGTCAGCAAGCGGTGTGAGCAAGGGCGAGGAGGATAACATGGCCATCATCAAGGAGTTCATGCGCTTCAAGGTGCACATGGAGGGCTCCGTGAACGGC	ATGAGATTTCCTTCAATTTTTACTGCTGTTTTATTCGCAGCATCCTCCGCATTAGCTGCTAGCAAAAAAAAAAAAAAAGCAAGCGGTGTGAGCAAGGGCGAGGAGGATAACATGGCCATCATCAAGGAGTTCATGCGCTTCAAGGTGCACATGGAGGGCTCCGTGAACGGC
ATGAGATTTCCTTCAATTTTTACTGCTGTTTTATTCGCAGCATCCTCCGCATTAGgCTGCTAGCCccttccatgta-----------TACGCAAGCGGTGTGAGCAAGGGCGAGGAGGATAACATGGCCATCATCAAGGAGTTCATGCGCTTCAAGGTGCACATGGAGGGCTCCGTGAACGGC	1	36	Insertion and Deletion	0	1		21	MRFPSIFTAVLFAASSALGC*											MRFPSIFTAVLFAASSALAASKKKKKASGVSKGEEDNMAIIKEFMRFKVHMEGSVNG	ATGAGATTTCCTTCAATTTTTACTGCTGTTTTATTCGCAGCATCCTCCGCATTAGGCTGCTAGCCCCTTCCATGTA-----------TACGCAAGCGGTGTGAGCAAGGGCGAGGAGGATAACATGGCCATCATCAAGGAGTTCATGCGCTTCAAGGTGCACATGGAGGGCTCCGTGAACGGC	ATGAGATTTCCTTCAATTTTTACTGCTGTTTTATTCGCAGCATCCTCCGCATTAGCTGCTAGCAAAAAAAAAAAAAAAGCAAGCGGTGTGAGCAAGGGCGAGGAGGATAACATGGCCATCATCAAGGAGTTCATGCGCTTCAAGGTGCACATGGAGGGCTCCGTGAACGGC
ATGAGATTTCCTTCAATTTTTACTGCTGTTTTATTCGCAGCATCCTCCGCATTAGgCTGCTAGCCCTCTAATATCAGTAGCAAGCGGTGTGAGCAAGGGCGAGGAGGATAACATGGCCATCATCAAGGAGTTCATGCGCTTCAAGGTGCACATGGAGGGCTCCGTGAACGGC	1	36	Insertion	0	1		21	MRFPSIFTAVLFAASSALGC*											MRFPSIFTAVLFAASSALAASKKKKKASGVSKGEEDNMAIIKEFMRFKVHMEGSVNG	ATGAGATTTCCTTCAATTTTTACTGCTGTTTTATTCGCAGCATCCTCCGCATTAGGCTGCTAGCCCTCTAATATCAGTAGCAAGCGGTGTGAGCAAGGGCGAGGAGGATAACATGGCCATCATCAAGGAGTTCATGCGCTTCAAGGTGCACATGGAGGGCTCCGTGAACGGC	ATGAGATTTCCTTCAATTTTTACTGCTGTTTTATTCGCAGCATCCTCCGCATTAGCTGCTAGCAAAAAAAAAAAAAAAGCAAGCGGTGTGAGCAAGGGCGAGGAGGATAACATGGCCATCATCAAGGAGTTCATGCGCTTCAAGGTGCACATGGAGGGCTCCGTGAACGGC
ATGAGATTTCCTTCAATTTTTACTGCTGTTTTATTCGCAGCATCCTCCGCATTAGgCTGCTAGCcggccatc-------------AATttctgCAAGCGGTGTGAGCAAGGGCGAGGAGGATAACATGGCCATCATCAAGGAGTTCATGCGCTTCAAGGTGCACATGGAGGGCTCCGTGAACGGC	1	35	Insertion and Deletion	0	1		21	MRFPSIFTAVLFAASSALGC*											MRFPSIFTAVLFAASSALAASKKKKKASGVSKGEEDNMAIIKEFMRFKVHMEGSVNG	ATGAGATTTCCTTCAATTTTTACTGCTGTTTTATTCGCAGCATCCTCCGCATTAGGCTGCTAGCCGGCCATC-------------AATTTCTGCAAGCGGTGTGAGCAAGGGCGAGGAGGATAACATGGCCATCATCAAGGAGTTCATGCGCTTCAAGGTGCACATGGAGGGCTCCGTGAACGGC	ATGAGATTTCCTTCAATTTTTACTGCTGTTTTATTCGCAGCATCCTCCGCATTAGCTGCTAGCAAAAAAAAAAAAAAAGCAAGCGGTGTGAGCAAGGGCGAGGAGGATAACATGGCCATCATCAAGGAGTTCATGCGCTTCAAGGTGCACATGGAGGGCTCCGTGAACGGC
ATGAGATTTCCTTCAATTTTTACTGCTGTTTTATTCGCAGCATCCTCCGCATTAGgCTGCTAGCCttagtttactga------------GGGCAAGCGGTGTGAGCAAGGGCGAGGAGGATAACATGGCCATCATCAAGGAGTTCATGCGCTTCAAGGTGCACATGGAGGGCTCCGTGAACGGC	1	34	Insertion and Deletion	0	1		21	MRFPSIFTAVLFAASSALGC*											MRFPSIFTAVLFAASSALAASKKKKKASGVSKGEEDNMAIIKEFMRFKVHMEGSVNG	ATGAGATTTCCTTCAATTTTTACTGCTGTTTTATTCGCAGCATCCTCCGCATTAGGCTGCTAGCCTTAGTTTACTGA------------GGGCAAGCGGTGTGAGCAAGGGCGAGGAGGATAACATGGCCATCATCAAGGAGTTCATGCGCTTCAAGGTGCACATGGAGGGCTCCGTGAACGGC	ATGAGATTTCCTTCAATTTTTACTGCTGTTTTATTCGCAGCATCCTCCGCATTAGCTGCTAGCAAAAAAAAAAAAAAAGCAAGCGGTGTGAGCAAGGGCGAGGAGGATAACATGGCCATCATCAAGGAGTTCATGCGCTTCAAGGTGCACATGGAGGGCTCCGTGAACGGC
ATGAGATTTCCTTCAATTTTTACTGCTGTTTTATTCGCAGCATCCTCCGCATTAGgCTGCTAGCcttcc-----------AATATcctttgCAAGCGGTGTGAGCAAGGGCGAGGAGGATAACATGGCCATCATCAAGGAGTTCATGCGCTTCAAGGTGCACATGGAGGGCTCCGTGAACGGC	1	36	Insertion and Deletion	0	1		21	MRFPSIFTAVLFAASSALGC*											MRFPSIFTAVLFAASSALAASKKKKKASGVSKGEEDNMAIIKEFMRFKVHMEGSVNG	ATGAGATTTCCTTCAATTTTTACTGCTGTTTTATTCGCAGCATCCTCCGCATTAGGCTGCTAGCCTTCC-----------AATATCCTTTGCAAGCGGTGTGAGCAAGGGCGAGGAGGATAACATGGCCATCATCAAGGAGTTCATGCGCTTCAAGGTGCACATGGAGGGCTCCGTGAACGGC	ATGAGATTTCCTTCAATTTTTACTGCTGTTTTATTCGCAGCATCCTCCGCATTAGCTGCTAGCAAAAAAAAAAAAAAAGCAAGCGGTGTGAGCAAGGGCGAGGAGGATAACATGGCCATCATCAAGGAGTTCATGCGCTTCAAGGTGCACATGGAGGGCTCCGTGAACGGC
ATGAGATTTCCTTCAATTTTTACTGCTGTTTTATTCGCAGCATCCTCCGCATTAGgCTGCTAGCCTTGTGATAGGAATTGCAAGCGGTGTGAGCAAGGGCGAGGAGGATAACATGGCCATCATCAAGGAGTTCATGCGCTTCAAGGTGCACATGGAGGGCTCCGTGAACGGC	1	35	Insertion	0	1		21	MRFPSIFTAVLFAASSALGC*											MRFPSIFTAVLFAASSALAASKKKKKASGVSKGEEDNMAIIKEFMRFKVHMEGSVNG	ATGAGATTTCCTTCAATTTTTACTGCTGTTTTATTCGCAGCATCCTCCGCATTAGGCTGCTAGCCTTGTGATAGGAATTGCAAGCGGTGTGAGCAAGGGCGAGGAGGATAACATGGCCATCATCAAGGAGTTCATGCGCTTCAAGGTGCACATGGAGGGCTCCGTGAACGGC	ATGAGATTTCCTTCAATTTTTACTGCTGTTTTATTCGCAGCATCCTCCGCATTAGCTGCTAGCAAAAAAAAAAAAAAAGCAAGCGGTGTGAGCAAGGGCGAGGAGGATAACATGGCCATCATCAAGGAGTTCATGCGCTTCAAGGTGCACATGGAGGGCTCCGTGAACGGC
ATGAGATTTCCTTCAATTTTTACTGCTGTTTTATTCGCAGCATCCTCCGCATTAGgCTGCTAGCGATTGTAGAAAAGATGCAAGCGGTGTGAGCAAGGGCGAGGAGGATAACATGGCCATCATCAAGGAGTTCATGCGCTTCAAGGTGCACATGGAGGGCTCCGTGAACGGC	1	25	Insertion	0	1		21	MRFPSIFTAVLFAASSALGC*											MRFPSIFTAVLFAASSALAASKKKKKASGVSKGEEDNMAIIKEFMRFKVHMEGSVNG	ATGAGATTTCCTTCAATTTTTACTGCTGTTTTATTCGCAGCATCCTCCGCATTAGGCTGCTAGCGATTGTAGAAAAGATGCAAGCGGTGTGAGCAAGGGCGAGGAGGATAACATGGCCATCATCAAGGAGTTCATGCGCTTCAAGGTGCACATGGAGGGCTCCGTGAACGGC	ATGAGATTTCCTTCAATTTTTACTGCTGTTTTATTCGCAGCATCCTCCGCATTAGCTGCTAGCAAAAAAAAAAAAAAAGCAAGCGGTGTGAGCAAGGGCGAGGAGGATAACATGGCCATCATCAAGGAGTTCATGCGCTTCAAGGTGCACATGGAGGGCTCCGTGAACGGC
ATGAGATTTCCTTCAATTTTTACTGCTGTTTTATTCGCAGCATCCTCCGCATTAGgCTGCTAGCGCCAAGCAGTGGCAAGCAAGCGGTGTGAGCAAGGGCGAGGAGGATAACATGGCCATCATCAAGGAGTTCATGCGCTTCAAGGTGCACATGGAGGGCTCCGTGAACGGC	1	31	Insertion	0	1		21	MRFPSIFTAVLFAASSALGC*											MRFPSIFTAVLFAASSALAASKKKKKASGVSKGEEDNMAIIKEFMRFKVHMEGSVNG	ATGAGATTTCCTTCAATTTTTACTGCTGTTTTATTCGCAGCATCCTCCGCATTAGGCTGCTAGCGCCAAGCAGTGGCAAGCAAGCGGTGTGAGCAAGGGCGAGGAGGATAACATGGCCATCATCAAGGAGTTCATGCGCTTCAAGGTGCACATGGAGGGCTCCGTGAACGGC	ATGAGATTTCCTTCAATTTTTACTGCTGTTTTATTCGCAGCATCCTCCGCATTAGCTGCTAGCAAAAAAAAAAAAAAAGCAAGCGGTGTGAGCAAGGGCGAGGAGGATAACATGGCCATCATCAAGGAGTTCATGCGCTTCAAGGTGCACATGGAGGGCTCCGTGAACGGC
ATGAGATTTCCTTCAATTTTTACTGCTGTTTTATTCGCAGCATCCTCCGCATTAGgCTGCTAGCgccaatgctcttgtc---------------GCAAGCGGTGTGAGCAAGGGCGAGGAGGATAACATGGCCATCATCAAGGAGTTCATGCGCTTCAAGGTGCACATGGAGGGCTCCGTGAACGGC	1	33	Insertion and Deletion	0	1		21	MRFPSIFTAVLFAASSALGC*											MRFPSIFTAVLFAASSALAASKKKKKASGVSKGEEDNMAIIKEFMRFKVHMEGSVNG	ATGAGATTTCCTTCAATTTTTACTGCTGTTTTATTCGCAGCATCCTCCGCATTAGGCTGCTAGCGCCAATGCTCTTGTC---------------GCAAGCGGTGTGAGCAAGGGCGAGGAGGATAACATGGCCATCATCAAGGAGTTCATGCGCTTCAAGGTGCACATGGAGGGCTCCGTGAACGGC	ATGAGATTTCCTTCAATTTTTACTGCTGTTTTATTCGCAGCATCCTCCGCATTAGCTGCTAGCAAAAAAAAAAAAAAAGCAAGCGGTGTGAGCAAGGGCGAGGAGGATAACATGGCCATCATCAAGGAGTTCATGCGCTTCAAGGTGCACATGGAGGGCTCCGTGAACGGC
ATGAGATTTCCTTCAATTTTTACTGCTGTTTTATTCGCAGCATCCTCCGCATTAGgCTGCTAGCGcgattagccgtga-------------TGCAAGCGGTGTGAGCAAGGGCGAGGAGGATAACATGGCCATCATCAAGGAGTTCATGCGCTTCAAGGTGCACATGGAGGGCTCCGTGAACGGC	1	35	Insertion and Deletion	0	1		21	MRFPSIFTAVLFAASSALGC*											MRFPSIFTAVLFAASSALAASKKKKKASGVSKGEEDNMAIIKEFMRFKVHMEGSVNG	ATGAGATTTCCTTCAATTTTTACTGCTGTTTTATTCGCAGCATCCTCCGCATTAGGCTGCTAGCGCGATTAGCCGTGA-------------TGCAAGCGGTGTGAGCAAGGGCGAGGAGGATAACATGGCCATCATCAAGGAGTTCATGCGCTTCAAGGTGCACATGGAGGGCTCCGTGAACGGC	ATGAGATTTCCTTCAATTTTTACTGCTGTTTTATTCGCAGCATCCTCCGCATTAGCTGCTAGCAAAAAAAAAAAAAAAGCAAGCGGTGTGAGCAAGGGCGAGGAGGATAACATGGCCATCATCAAGGAGTTCATGCGCTTCAAGGTGCACATGGAGGGCTCCGTGAACGGC
ATGAGATTTCCTTCAATTTTTACTGCTGTTTTATTCGCAGCATCCTCCGCATTAGgCTGCTAGCGCTATACATCGAGTAGCAAGCGGTGTGAGCAAGGGCGAGGAGGATAACATGGCCATCATCAAGGAGTTCATGCGCTTCAAGGTGCACATGGAGGGCTCCGTGAACGGC	1	36	Insertion	0	1		21	MRFPSIFTAVLFAASSALGC*											MRFPSIFTAVLFAASSALAASKKKKKASGVSKGEEDNMAIIKEFMRFKVHMEGSVNG	ATGAGATTTCCTTCAATTTTTACTGCTGTTTTATTCGCAGCATCCTCCGCATTAGGCTGCTAGCGCTATACATCGAGTAGCAAGCGGTGTGAGCAAGGGCGAGGAGGATAACATGGCCATCATCAAGGAGTTCATGCGCTTCAAGGTGCACATGGAGGGCTCCGTGAACGGC	ATGAGATTTCCTTCAATTTTTACTGCTGTTTTATTCGCAGCATCCTCCGCATTAGCTGCTAGCAAAAAAAAAAAAAAAGCAAGCGGTGTGAGCAAGGGCGAGGAGGATAACATGGCCATCATCAAGGAGTTCATGCGCTTCAAGGTGCACATGGAGGGCTCCGTGAACGGC
ATGAGATTTCCTTCAATTTTTACTGCTGTTTTATTCGCAGCATCCTCCGCATTAGgCTGCTAGCGgcta-------------AGggagtggggCAAGCGGTGTGAGCAAGGGCGAGGAGGATAACATGGCCATCATCAAGGAGTTCATGCGCTTCAAGGTGCACATGGAGGGCTCCGTGAACGGC	1	36	Insertion and Deletion	0	1		21	MRFPSIFTAVLFAASSALGC*											MRFPSIFTAVLFAASSALAASKKKKKASGVSKGEEDNMAIIKEFMRFKVHMEGSVNG	ATGAGATTTCCTTCAATTTTTACTGCTGTTTTATTCGCAGCATCCTCCGCATTAGGCTGCTAGCGGCTA-------------AGGGAGTGGGGCAAGCGGTGTGAGCAAGGGCGAGGAGGATAACATGGCCATCATCAAGGAGTTCATGCGCTTCAAGGTGCACATGGAGGGCTCCGTGAACGGC	ATGAGATTTCCTTCAATTTTTACTGCTGTTTTATTCGCAGCATCCTCCGCATTAGCTGCTAGCAAAAAAAAAAAAAAAGCAAGCGGTGTGAGCAAGGGCGAGGAGGATAACATGGCCATCATCAAGGAGTTCATGCGCTTCAAGGTGCACATGGAGGGCTCCGTGAACGGC
ATGAGATTTCCTTCAATTTTTACTGCTGTTTTATTCGCAGCATCCTCCGCATTAGgCTGCTAGCGGGAAGAAAAGTTTAGCAAGCGGTGTGAGCAAGGGCGAGGAGGATAACATGGCCATCATCAAGGAGTTCATGCGCTTCAAGGTGCACATGGAGGGCTCCGTGAACGGC	1	35	Insertion	0	1		21	MRFPSIFTAVLFAASSALGC*											MRFPSIFTAVLFAASSALAASKKKKKASGVSKGEEDNMAIIKEFMRFKVHMEGSVNG	ATGAGATTTCCTTCAATTTTTACTGCTGTTTTATTCGCAGCATCCTCCGCATTAGGCTGCTAGCGGGAAGAAAAGTTTAGCAAGCGGTGTGAGCAAGGGCGAGGAGGATAACATGGCCATCATCAAGGAGTTCATGCGCTTCAAGGTGCACATGGAGGGCTCCGTGAACGGC	ATGAGATTTCCTTCAATTTTTACTGCTGTTTTATTCGCAGCATCCTCCGCATTAGCTGCTAGCAAAAAAAAAAAAAAAGCAAGCGGTGTGAGCAAGGGCGAGGAGGATAACATGGCCATCATCAAGGAGTTCATGCGCTTCAAGGTGCACATGGAGGGCTCCGTGAACGGC
ATGAGATTTCCTTCAATTTTTACTGCTGTTTTATTCGCAGCATCCTCCGCATTAGgCTGCTAGCGgggttta-------ACTGATAGCAAGCGGTGTGAGCAAGGGCGAGGAGGATAACATGGCCATCATCAAGGAGTTCATGCGCTTCAAGGTGCACATGGAGGGCTCCGTGAACGGC	1	35	Insertion and Deletion	0	1		21	MRFPSIFTAVLFAASSALGC*											MRFPSIFTAVLFAASSALAASKKKKKASGVSKGEEDNMAIIKEFMRFKVHMEGSVNG	ATGAGATTTCCTTCAATTTTTACTGCTGTTTTATTCGCAGCATCCTCCGCATTAGGCTGCTAGCGGGGTTTA-------ACTGATAGCAAGCGGTGTGAGCAAGGGCGAGGAGGATAACATGGCCATCATCAAGGAGTTCATGCGCTTCAAGGTGCACATGGAGGGCTCCGTGAACGGC	ATGAGATTTCCTTCAATTTTTACTGCTGTTTTATTCGCAGCATCCTCCGCATTAGCTGCTAGCAAAAAAAAAAAAAAAGCAAGCGGTGTGAGCAAGGGCGAGGAGGATAACATGGCCATCATCAAGGAGTTCATGCGCTTCAAGGTGCACATGGAGGGCTCCGTGAACGGC
ATGAGATTTCCTTCAATTTTTACTGCTGTTTTATTCGCAGCATCCTCCGCATTAGgCTGCTAGCGGGTATCGAACTCAGGCAAGCGGTGTGAGCAAGGGCGAGGAGGATAACATGGCCATCATCAAGGAGTTCATGCGCTTCAAGGTGCACATGGAGGGCTCCGTGAACGGC	1	35	Insertion	0	1		21	MRFPSIFTAVLFAASSALGC*											MRFPSIFTAVLFAASSALAASKKKKKASGVSKGEEDNMAIIKEFMRFKVHMEGSVNG	ATGAGATTTCCTTCAATTTTTACTGCTGTTTTATTCGCAGCATCCTCCGCATTAGGCTGCTAGCGGGTATCGAACTCAGGCAAGCGGTGTGAGCAAGGGCGAGGAGGATAACATGGCCATCATCAAGGAGTTCATGCGCTTCAAGGTGCACATGGAGGGCTCCGTGAACGGC	ATGAGATTTCCTTCAATTTTTACTGCTGTTTTATTCGCAGCATCCTCCGCATTAGCTGCTAGCAAAAAAAAAAAAAAAGCAAGCGGTGTGAGCAAGGGCGAGGAGGATAACATGGCCATCATCAAGGAGTTCATGCGCTTCAAGGTGCACATGGAGGGCTCCGTGAACGGC
ATGAGATTTCCTTCAATTTTTACTGCTGTTTTATTCGCAGCATCCTCCGCATTAGgCTGCTAGCGggttgattga----------TAGCGCAAGCGGTGTGAGCAAGGGCGAGGAGGATAACATGGCCATCATCAAGGAGTTCATGCGCTTCAAGGTGCACATGGAGGGCTCCGTGAACGGC	1	23	Insertion and Deletion	0	1		21	MRFPSIFTAVLFAASSALGC*											MRFPSIFTAVLFAASSALAASKKKKKASGVSKGEEDNMAIIKEFMRFKVHMEGSVNG	ATGAGATTTCCTTCAATTTTTACTGCTGTTTTATTCGCAGCATCCTCCGCATTAGGCTGCTAGCGGGTTGATTGA----------TAGCGCAAGCGGTGTGAGCAAGGGCGAGGAGGATAACATGGCCATCATCAAGGAGTTCATGCGCTTCAAGGTGCACATGGAGGGCTCCGTGAACGGC	ATGAGATTTCCTTCAATTTTTACTGCTGTTTTATTCGCAGCATCCTCCGCATTAGCTGCTAGCAAAAAAAAAAAAAAAGCAAGCGGTGTGAGCAAGGGCGAGGAGGATAACATGGCCATCATCAAGGAGTTCATGCGCTTCAAGGTGCACATGGAGGGCTCCGTGAACGGC
ATGAGATTTCCTTCAATTTTTACTGCTGTTTTATTCGCAGCATCCTCCGCATTAGgCTGCTAGCGGTATTGACAGTATGGCAAGCGGTGTGAGCAAGGGCGAGGAGGATAACATGGCCATCATCAAGGAGTTCATGCGCTTCAAGGTGCACATGGAGGGCTCCGTGAACGGC	1	36	Insertion	0	1		21	MRFPSIFTAVLFAASSALGC*											MRFPSIFTAVLFAASSALAASKKKKKASGVSKGEEDNMAIIKEFMRFKVHMEGSVNG	ATGAGATTTCCTTCAATTTTTACTGCTGTTTTATTCGCAGCATCCTCCGCATTAGGCTGCTAGCGGTATTGACAGTATGGCAAGCGGTGTGAGCAAGGGCGAGGAGGATAACATGGCCATCATCAAGGAGTTCATGCGCTTCAAGGTGCACATGGAGGGCTCCGTGAACGGC	ATGAGATTTCCTTCAATTTTTACTGCTGTTTTATTCGCAGCATCCTCCGCATTAGCTGCTAGCAAAAAAAAAAAAAAAGCAAGCGGTGTGAGCAAGGGCGAGGAGGATAACATGGCCATCATCAAGGAGTTCATGCGCTTCAAGGTGCACATGGAGGGCTCCGTGAACGGC
ATGAGATTTCCTTCAATTTTTACTGCTGTTTTATTCGCAGCATCCTCCGCATTAGgCTGCTAGCGTTAGATGTCATGAGGCAAGCGGTGTGAGCAAGGGCGAGGAGGATAACATGGCCATCATCAAGGAGTTCATGCGCTTCAAGGTGCACATGGAGGGCTCCGTGAACGGC	1	33	Insertion	0	1		21	MRFPSIFTAVLFAASSALGC*											MRFPSIFTAVLFAASSALAASKKKKKASGVSKGEEDNMAIIKEFMRFKVHMEGSVNG	ATGAGATTTCCTTCAATTTTTACTGCTGTTTTATTCGCAGCATCCTCCGCATTAGGCTGCTAGCGTTAGATGTCATGAGGCAAGCGGTGTGAGCAAGGGCGAGGAGGATAACATGGCCATCATCAAGGAGTTCATGCGCTTCAAGGTGCACATGGAGGGCTCCGTGAACGGC	ATGAGATTTCCTTCAATTTTTACTGCTGTTTTATTCGCAGCATCCTCCGCATTAGCTGCTAGCAAAAAAAAAAAAAAAGCAAGCGGTGTGAGCAAGGGCGAGGAGGATAACATGGCCATCATCAAGGAGTTCATGCGCTTCAAGGTGCACATGGAGGGCTCCGTGAACGGC
ATGAGATTTCCTTCAATTTTTACTGCTGTTTTATTCGCAGCATCCTCCGCATTAGgCTGCTAGCGttctagtagagtga--------------GCAAGCGGTGTGAGCAAGGGCGAGGAGGATAACATGGCCATCATCAAGGAGTTCATGCGCTTCAAGGTGCACATGGAGGGCTCCGTGAACGGC	1	31	Insertion and Deletion	0	1		21	MRFPSIFTAVLFAASSALGC*											MRFPSIFTAVLFAASSALAASKKKKKASGVSKGEEDNMAIIKEFMRFKVHMEGSVNG	ATGAGATTTCCTTCAATTTTTACTGCTGTTTTATTCGCAGCATCCTCCGCATTAGGCTGCTAGCGTTCTAGTAGAGTGA--------------GCAAGCGGTGTGAGCAAGGGCGAGGAGGATAACATGGCCATCATCAAGGAGTTCATGCGCTTCAAGGTGCACATGGAGGGCTCCGTGAACGGC	ATGAGATTTCCTTCAATTTTTACTGCTGTTTTATTCGCAGCATCCTCCGCATTAGCTGCTAGCAAAAAAAAAAAAAAAGCAAGCGGTGTGAGCAAGGGCGAGGAGGATAACATGGCCATCATCAAGGAGTTCATGCGCTTCAAGGTGCACATGGAGGGCTCCGTGAACGGC
ATGAGATTTCCTTCAATTTTTACTGCTGTTTTATTCGCAGCATCCTCCGCATTAGgCTGCTAGCTAGAAAAACAGGATCGCAAGCGGTGTGAGCAAGGGCGAGGAGGATAACATGGCCATCATCAAGGAGTTCATGCGCTTCAAGGTGCACATGGAGGGCTCCGTGAACGGC	1	36	Insertion	0	1		21	MRFPSIFTAVLFAASSALGC*											MRFPSIFTAVLFAASSALAASKKKKKASGVSKGEEDNMAIIKEFMRFKVHMEGSVNG	ATGAGATTTCCTTCAATTTTTACTGCTGTTTTATTCGCAGCATCCTCCGCATTAGGCTGCTAGCTAGAAAAACAGGATCGCAAGCGGTGTGAGCAAGGGCGAGGAGGATAACATGGCCATCATCAAGGAGTTCATGCGCTTCAAGGTGCACATGGAGGGCTCCGTGAACGGC	ATGAGATTTCCTTCAATTTTTACTGCTGTTTTATTCGCAGCATCCTCCGCATTAGCTGCTAGCAAAAAAAAAAAAAAAGCAAGCGGTGTGAGCAAGGGCGAGGAGGATAACATGGCCATCATCAAGGAGTTCATGCGCTTCAAGGTGCACATGGAGGGCTCCGTGAACGGC
ATGAGATTTCCTTCAATTTTTACTGCTGTTTTATTCGCAGCATCCTCCGCATTAGgCTGCTAGCTAGCTGTATATATCCGCAAGCGGTGTGAGCAAGGGCGAGGAGGATAACATGGCCATCATCAAGGAGTTCATGCGCTTCAAGGTGCACATGGAGGGCTCCGTGAACGGC	1	36	Insertion	0	1		21	MRFPSIFTAVLFAASSALGC*											MRFPSIFTAVLFAASSALAASKKKKKASGVSKGEEDNMAIIKEFMRFKVHMEGSVNG	ATGAGATTTCCTTCAATTTTTACTGCTGTTTTATTCGCAGCATCCTCCGCATTAGGCTGCTAGCTAGCTGTATATATCCGCAAGCGGTGTGAGCAAGGGCGAGGAGGATAACATGGCCATCATCAAGGAGTTCATGCGCTTCAAGGTGCACATGGAGGGCTCCGTGAACGGC	ATGAGATTTCCTTCAATTTTTACTGCTGTTTTATTCGCAGCATCCTCCGCATTAGCTGCTAGCAAAAAAAAAAAAAAAGCAAGCGGTGTGAGCAAGGGCGAGGAGGATAACATGGCCATCATCAAGGAGTTCATGCGCTTCAAGGTGCACATGGAGGGCTCCGTGAACGGC
ATGAGATTTCCTTCAATTTTTACTGCTGTTTTATTCGCAGCATCCTCCGCATTAGgCTGCTAGCTCAATTTTAGTAGGGGCAAGCGGTGTGAGCAAGGGCGAGGAGGATAACATGGCCATCATCAAGGAGTTCATGCGCTTCAAGGTGCACATGGAGGGCTCCGTGAACGGC	1	35	Insertion	0	1		21	MRFPSIFTAVLFAASSALGC*											MRFPSIFTAVLFAASSALAASKKKKKASGVSKGEEDNMAIIKEFMRFKVHMEGSVNG	ATGAGATTTCCTTCAATTTTTACTGCTGTTTTATTCGCAGCATCCTCCGCATTAGGCTGCTAGCTCAATTTTAGTAGGGGCAAGCGGTGTGAGCAAGGGCGAGGAGGATAACATGGCCATCATCAAGGAGTTCATGCGCTTCAAGGTGCACATGGAGGGCTCCGTGAACGGC	ATGAGATTTCCTTCAATTTTTACTGCTGTTTTATTCGCAGCATCCTCCGCATTAGCTGCTAGCAAAAAAAAAAAAAAAGCAAGCGGTGTGAGCAAGGGCGAGGAGGATAACATGGCCATCATCAAGGAGTTCATGCGCTTCAAGGTGCACATGGAGGGCTCCGTGAACGGC
ATGAGATTTCCTTCAATTTTTACTGCTGTTTTATTCGCAGCATCCTCCGCATTAGgCTGCTAGCTCATATGCCATTTAGGCAAGCGGTGTGAGCAAGGGCGAGGAGGATAACATGGCCATCATCAAGGAGTTCATGCGCTTCAAGGTGCACATGGAGGGCTCCGTGAACGGC	1	28	Insertion	0	1		21	MRFPSIFTAVLFAASSALGC*											MRFPSIFTAVLFAASSALAASKKKKKASGVSKGEEDNMAIIKEFMRFKVHMEGSVNG	ATGAGATTTCCTTCAATTTTTACTGCTGTTTTATTCGCAGCATCCTCCGCATTAGGCTGCTAGCTCATATGCCATTTAGGCAAGCGGTGTGAGCAAGGGCGAGGAGGATAACATGGCCATCATCAAGGAGTTCATGCGCTTCAAGGTGCACATGGAGGGCTCCGTGAACGGC	ATGAGATTTCCTTCAATTTTTACTGCTGTTTTATTCGCAGCATCCTCCGCATTAGCTGCTAGCAAAAAAAAAAAAAAAGCAAGCGGTGTGAGCAAGGGCGAGGAGGATAACATGGCCATCATCAAGGAGTTCATGCGCTTCAAGGTGCACATGGAGGGCTCCGTGAACGGC
ATGAGATTTCCTTCAATTTTTACTGCTGTTTTATTCGCAGCATCCTCCGCATTAGgCTGCTAGCTccttatcttgtgtt--------------GCAAGCGGTGTGAGCAAGGGCGAGGAGGATAACATGGCCATCATCAAGGAGTTCATGCGCTTCAAGGTGCACATGGAGGGCTCCGTGAACGGC	1	35	Insertion and Deletion	0	1		21	MRFPSIFTAVLFAASSALGC*											MRFPSIFTAVLFAASSALAASKKKKKASGVSKGEEDNMAIIKEFMRFKVHMEGSVNG	ATGAGATTTCCTTCAATTTTTACTGCTGTTTTATTCGCAGCATCCTCCGCATTAGGCTGCTAGCTCCTTATCTTGTGTT--------------GCAAGCGGTGTGAGCAAGGGCGAGGAGGATAACATGGCCATCATCAAGGAGTTCATGCGCTTCAAGGTGCACATGGAGGGCTCCGTGAACGGC	ATGAGATTTCCTTCAATTTTTACTGCTGTTTTATTCGCAGCATCCTCCGCATTAGCTGCTAGCAAAAAAAAAAAAAAAGCAAGCGGTGTGAGCAAGGGCGAGGAGGATAACATGGCCATCATCAAGGAGTTCATGCGCTTCAAGGTGCACATGGAGGGCTCCGTGAACGGC
ATGAGATTTCCTTCAATTTTTACTGCTGTTTTATTCGCAGCATCCTCCGCATTAGgCTGCTAGCTcgctcttcta---------ACGAAGCAAGCGGTGTGAGCAAGGGCGAGGAGGATAACATGGCCATCATCAAGGAGTTCATGCGCTTCAAGGTGCACATGGAGGGCTCCGTGAACGGC	1	32	Insertion and Deletion	0	2		21	MRFPSIFTAVLFAASSALGC*											MRFPSIFTAVLFAASSALAASKKKKKASGVSKGEEDNMAIIKEFMRFKVHMEGSVNG	ATGAGATTTCCTTCAATTTTTACTGCTGTTTTATTCGCAGCATCCTCCGCATTAGGCTGCTAGCTCGCTCTTCTA---------ACGAAGCAAGCGGTGTGAGCAAGGGCGAGGAGGATAACATGGCCATCATCAAGGAGTTCATGCGCTTCAAGGTGCACATGGAGGGCTCCGTGAACGGC	ATGAGATTTCCTTCAATTTTTACTGCTGTTTTATTCGCAGCATCCTCCGCATTAGCTGCTAGCAAAAAAAAAAAAAAAGCAAGCGGTGTGAGCAAGGGCGAGGAGGATAACATGGCCATCATCAAGGAGTTCATGCGCTTCAAGGTGCACATGGAGGGCTCCGTGAACGGC
ATGAGATTTCCTTCAATTTTTACTGCTGTTTTATTCGCAGCATCCTCCGCATTAGgCTGCTAGCTcggtagga------------ACgttaGCAAGCGGTGTGAGCAAGGGCGAGGAGGATAACATGGCCATCATCAAGGAGTTCATGCGCTTCAAGGTGCACATGGAGGGCTCCGTGAACGGC	1	35	Insertion and Deletion	0	1		21	MRFPSIFTAVLFAASSALGC*											MRFPSIFTAVLFAASSALAASKKKKKASGVSKGEEDNMAIIKEFMRFKVHMEGSVNG	ATGAGATTTCCTTCAATTTTTACTGCTGTTTTATTCGCAGCATCCTCCGCATTAGGCTGCTAGCTCGGTAGGA------------ACGTTAGCAAGCGGTGTGAGCAAGGGCGAGGAGGATAACATGGCCATCATCAAGGAGTTCATGCGCTTCAAGGTGCACATGGAGGGCTCCGTGAACGGC	ATGAGATTTCCTTCAATTTTTACTGCTGTTTTATTCGCAGCATCCTCCGCATTAGCTGCTAGCAAAAAAAAAAAAAAAGCAAGCGGTGTGAGCAAGGGCGAGGAGGATAACATGGCCATCATCAAGGAGTTCATGCGCTTCAAGGTGCACATGGAGGGCTCCGTGAACGGC
ATGAGATTTCCTTCAATTTTTACTGCTGTTTTATTCGCAGCATCCTCCGCATTAGgCTGCTAGCTCTAGACCATTGAATGCAAGCGGTGTGAGCAAGGGCGAGGAGGATAACATGGCCATCATCAAGGAGTTCATGCGCTTCAAGGTGCACATGGAGGGCTCCGTGAACGGC	1	34	Insertion	0	1		21	MRFPSIFTAVLFAASSALGC*											MRFPSIFTAVLFAASSALAASKKKKKASGVSKGEEDNMAIIKEFMRFKVHMEGSVNG	ATGAGATTTCCTTCAATTTTTACTGCTGTTTTATTCGCAGCATCCTCCGCATTAGGCTGCTAGCTCTAGACCATTGAATGCAAGCGGTGTGAGCAAGGGCGAGGAGGATAACATGGCCATCATCAAGGAGTTCATGCGCTTCAAGGTGCACATGGAGGGCTCCGTGAACGGC	ATGAGATTTCCTTCAATTTTTACTGCTGTTTTATTCGCAGCATCCTCCGCATTAGCTGCTAGCAAAAAAAAAAAAAAAGCAAGCGGTGTGAGCAAGGGCGAGGAGGATAACATGGCCATCATCAAGGAGTTCATGCGCTTCAAGGTGCACATGGAGGGCTCCGTGAACGGC
ATGAGATTTCCTTCAATTTTTACTGCTGTTTTATTCGCAGCATCCTCCGCATTAGgCTGCTAGCTcttggtgtggtta-------------GGCAAGCGGTGTGAGCAAGGGCGAGGAGGATAACATGGCCATCATCAAGGAGTTCATGCGCTTCAAGGTGCACATGGAGGGCTCCGTGAACGGC	1	36	Insertion and Deletion	0	1		21	MRFPSIFTAVLFAASSALGC*											MRFPSIFTAVLFAASSALAASKKKKKASGVSKGEEDNMAIIKEFMRFKVHMEGSVNG	ATGAGATTTCCTTCAATTTTTACTGCTGTTTTATTCGCAGCATCCTCCGCATTAGGCTGCTAGCTCTTGGTGTGGTTA-------------GGCAAGCGGTGTGAGCAAGGGCGAGGAGGATAACATGGCCATCATCAAGGAGTTCATGCGCTTCAAGGTGCACATGGAGGGCTCCGTGAACGGC	ATGAGATTTCCTTCAATTTTTACTGCTGTTTTATTCGCAGCATCCTCCGCATTAGCTGCTAGCAAAAAAAAAAAAAAAGCAAGCGGTGTGAGCAAGGGCGAGGAGGATAACATGGCCATCATCAAGGAGTTCATGCGCTTCAAGGTGCACATGGAGGGCTCCGTGAACGGC
ATGAGATTTCCTTCAATTTTTACTGCTGTTTTATTCGCAGCATCCTCCGCATTAGgCTGCTAGCTGATATCTATCATTGGCAAGCGGTGTGAGCAAGGGCGAGGAGGATAACATGGCCATCATCAAGGAGTTCATGCGCTTCAAGGTGCACATGGAGGGCTCCGTGAACGGC	1	36	Insertion	0	1		21	MRFPSIFTAVLFAASSALGC*											MRFPSIFTAVLFAASSALAASKKKKKASGVSKGEEDNMAIIKEFMRFKVHMEGSVNG	ATGAGATTTCCTTCAATTTTTACTGCTGTTTTATTCGCAGCATCCTCCGCATTAGGCTGCTAGCTGATATCTATCATTGGCAAGCGGTGTGAGCAAGGGCGAGGAGGATAACATGGCCATCATCAAGGAGTTCATGCGCTTCAAGGTGCACATGGAGGGCTCCGTGAACGGC	ATGAGATTTCCTTCAATTTTTACTGCTGTTTTATTCGCAGCATCCTCCGCATTAGCTGCTAGCAAAAAAAAAAAAAAAGCAAGCGGTGTGAGCAAGGGCGAGGAGGATAACATGGCCATCATCAAGGAGTTCATGCGCTTCAAGGTGCACATGGAGGGCTCCGTGAACGGC
ATGAGATTTCCTTCAATTTTTACTGCTGTTTTATTCGCAGCATCCTCCGCATTAGgCTGCTAGCTgatgatgtgcgga-------------AGCAAGCGGTGTGAGCAAGGGCGAGGAGGATAACATGGCCATCATCAAGGAGTTCATGCGCTTCAAGGTGCACATGGAGGGCTCCGTGAACGGC	1	35	Insertion and Deletion	0	1		21	MRFPSIFTAVLFAASSALGC*											MRFPSIFTAVLFAASSALAASKKKKKASGVSKGEEDNMAIIKEFMRFKVHMEGSVNG	ATGAGATTTCCTTCAATTTTTACTGCTGTTTTATTCGCAGCATCCTCCGCATTAGGCTGCTAGCTGATGATGTGCGGA-------------AGCAAGCGGTGTGAGCAAGGGCGAGGAGGATAACATGGCCATCATCAAGGAGTTCATGCGCTTCAAGGTGCACATGGAGGGCTCCGTGAACGGC	ATGAGATTTCCTTCAATTTTTACTGCTGTTTTATTCGCAGCATCCTCCGCATTAGCTGCTAGCAAAAAAAAAAAAAAAGCAAGCGGTGTGAGCAAGGGCGAGGAGGATAACATGGCCATCATCAAGGAGTTCATGCGCTTCAAGGTGCACATGGAGGGCTCCGTGAACGGC
ATGAGATTTCCTTCAATTTTTACTGCTGTTTTATTCGCAGCATCCTCCGCATTAGgCTGCTAGCTtgggtgattggga-------------GGCAAGCGGTGTGAGCAAGGGCGAGGAGGATAACATGGCCATCATCAAGGAGTTCATGCGCTTCAAGGTGCACATGGAGGGCTCCGTGAACGGC	1	32	Insertion and Deletion	0	1		21	MRFPSIFTAVLFAASSALGC*											MRFPSIFTAVLFAASSALAASKKKKKASGVSKGEEDNMAIIKEFMRFKVHMEGSVNG	ATGAGATTTCCTTCAATTTTTACTGCTGTTTTATTCGCAGCATCCTCCGCATTAGGCTGCTAGCTTGGGTGATTGGGA-------------GGCAAGCGGTGTGAGCAAGGGCGAGGAGGATAACATGGCCATCATCAAGGAGTTCATGCGCTTCAAGGTGCACATGGAGGGCTCCGTGAACGGC	ATGAGATTTCCTTCAATTTTTACTGCTGTTTTATTCGCAGCATCCTCCGCATTAGCTGCTAGCAAAAAAAAAAAAAAAGCAAGCGGTGTGAGCAAGGGCGAGGAGGATAACATGGCCATCATCAAGGAGTTCATGCGCTTCAAGGTGCACATGGAGGGCTCCGTGAACGGC
ATGAGATTTCCTTCAATTTTTACTGCTGTTTTATTCGCAGCATCCTCCGCATTAGgCTGCTAGCTTTGAACCTCGAAGGGCAAGCGGTGTGAGCAAGGGCGAGGAGGATAACATGGCCATCATCAAGGAGTTCATGCGCTTCAAGGTGCACATGGAGGGCTCCGTGAACGGC	1	36	Insertion	0	1		21	MRFPSIFTAVLFAASSALGC*											MRFPSIFTAVLFAASSALAASKKKKKASGVSKGEEDNMAIIKEFMRFKVHMEGSVNG	ATGAGATTTCCTTCAATTTTTACTGCTGTTTTATTCGCAGCATCCTCCGCATTAGGCTGCTAGCTTTGAACCTCGAAGGGCAAGCGGTGTGAGCAAGGGCGAGGAGGATAACATGGCCATCATCAAGGAGTTCATGCGCTTCAAGGTGCACATGGAGGGCTCCGTGAACGGC	ATGAGATTTCCTTCAATTTTTACTGCTGTTTTATTCGCAGCATCCTCCGCATTAGCTGCTAGCAAAAAAAAAAAAAAAGCAAGCGGTGTGAGCAAGGGCGAGGAGGATAACATGGCCATCATCAAGGAGTTCATGCGCTTCAAGGTGCACATGGAGGGCTCCGTGAACGGC
ATGAGATTTCCTTCAATTTTTACTGCTGTTTTATTCGCAGCATCCTCCGCATTAGgCTGCTAGGcgttc--------ACTATACcttaGCAAGCGGTGTGAGCAAGGGCGAGGAGGATAACATGGCCATCATCAAGGAGTTCATGCGCTTCAAGGTGCACATGGAGGGCTCCGTGAACGGC	1	35	Insertion and Deletion	0	2		21	MRFPSIFTAVLFAASSALGC*											MRFPSIFTAVLFAASSALAASKKKKKASGVSKGEEDNMAIIKEFMRFKVHMEGSVNG	ATGAGATTTCCTTCAATTTTTACTGCTGTTTTATTCGCAGCATCCTCCGCATTAGGCTGCTAGGCGTTC--------ACTATACCTTAGCAAGCGGTGTGAGCAAGGGCGAGGAGGATAACATGGCCATCATCAAGGAGTTCATGCGCTTCAAGGTGCACATGGAGGGCTCCGTGAACGGC	ATGAGATTTCCTTCAATTTTTACTGCTGTTTTATTCGCAGCATCCTCCGCATTAGCTGCTAGCAAAAAAAAAAAAAAAGCAAGCGGTGTGAGCAAGGGCGAGGAGGATAACATGGCCATCATCAAGGAGTTCATGCGCTTCAAGGTGCACATGGAGGGCTCCGTGAACGGC
ATGAGATTTCCTTCAATTTTTACTGCTGTTTTATTCGCAGCATCCTCCGCATTAGgCTGCTAGGctagtttc--------------ATtatcgtgCAAGCGGTGTGAGCAAGGGCGAGGAGGATAACATGGCCATCATCAAGGAGTTCATGCGCTTCAAGGTGCACATGGAGGGCTCCGTGAACGGC	1	31	Insertion and Deletion	0	2		21	MRFPSIFTAVLFAASSALGC*											MRFPSIFTAVLFAASSALAASKKKKKASGVSKGEEDNMAIIKEFMRFKVHMEGSVNG	ATGAGATTTCCTTCAATTTTTACTGCTGTTTTATTCGCAGCATCCTCCGCATTAGGCTGCTAGGCTAGTTTC--------------ATTATCGTGCAAGCGGTGTGAGCAAGGGCGAGGAGGATAACATGGCCATCATCAAGGAGTTCATGCGCTTCAAGGTGCACATGGAGGGCTCCGTGAACGGC	ATGAGATTTCCTTCAATTTTTACTGCTGTTTTATTCGCAGCATCCTCCGCATTAGCTGCTAGCAAAAAAAAAAAAAAAGCAAGCGGTGTGAGCAAGGGCGAGGAGGATAACATGGCCATCATCAAGGAGTTCATGCGCTTCAAGGTGCACATGGAGGGCTCCGTGAACGGC
ATGAGATTTCCTTCAATTTTTACTGCTGTTTTATTCGCAGCATCCTCCGCATTAGgCTGCTAGgCTATAATTTGAGGAGGGCAAGCGGTGTGAGCAAGGGCGAGGAGGATAACATGGCCATCATCAAGGAGTTCATGCGCTTCAAGGTGCACATGGAGGGCTCCGTGAACGGC	1	36	Insertion	0	2		21	MRFPSIFTAVLFAASSALGC*											MRFPSIFTAVLFAASSALAASKKKKKASGVSKGEEDNMAIIKEFMRFKVHMEGSVNG	ATGAGATTTCCTTCAATTTTTACTGCTGTTTTATTCGCAGCATCCTCCGCATTAGGCTGCTAGGCTATAATTTGAGGAGGGCAAGCGGTGTGAGCAAGGGCGAGGAGGATAACATGGCCATCATCAAGGAGTTCATGCGCTTCAAGGTGCACATGGAGGGCTCCGTGAACGGC	ATGAGATTTCCTTCAATTTTTACTGCTGTTTTATTCGCAGCATCCTCCGCATTAGCTGCTAGCAAAAAAAAAAAAAAAGCAAGCGGTGTGAGCAAGGGCGAGGAGGATAACATGGCCATCATCAAGGAGTTCATGCGCTTCAAGGTGCACATGGAGGGCTCCGTGAACGGC
ATGAGATTTCCTTCAATTTTTACTGCTGTTTTATTCGCAGCATCCTCCGCATTAGgCTGCTAGGctgagctaccatc------------ATGGCAAGCGGTGTGAGCAAGGGCGAGGAGGATAACATGGCCATCATCAAGGAGTTCATGCGCTTCAAGGTGCACATGGAGGGCTCCGTGAACGGC	1	27	Insertion and Deletion	0	2		21	MRFPSIFTAVLFAASSALGC*											MRFPSIFTAVLFAASSALAASKKKKKASGVSKGEEDNMAIIKEFMRFKVHMEGSVNG	ATGAGATTTCCTTCAATTTTTACTGCTGTTTTATTCGCAGCATCCTCCGCATTAGGCTGCTAGGCTGAGCTACCATC------------ATGGCAAGCGGTGTGAGCAAGGGCGAGGAGGATAACATGGCCATCATCAAGGAGTTCATGCGCTTCAAGGTGCACATGGAGGGCTCCGTGAACGGC	ATGAGATTTCCTTCAATTTTTACTGCTGTTTTATTCGCAGCATCCTCCGCATTAGCTGCTAGCAAAAAAAAAAAAAAAGCAAGCGGTGTGAGCAAGGGCGAGGAGGATAACATGGCCATCATCAAGGAGTTCATGCGCTTCAAGGTGCACATGGAGGGCTCCGTGAACGGC
ATGAGATTTCCTTCAATTTTTACTGCTGTTTTATTCGCAGCATCCTCCGCATtTAGCTGCTAGC---------------GGctgtgggtatgttgcAAGCGGTGTGAGCAAGGGCGAGGAGGATAACATGGCCATCATCAAGGAGTTCATGCGCTTCAAGGTGCACATGGAGGGCTCCGTGAACGGC	1	34	Insertion and Deletion	0	1		21	MRFPSIFTAVLFAASSAFSC*											MRFPSIFTAVLFAASSALAASKKKKKASGVSKGEEDNMAIIKEFMRFKVHMEGSVNG	ATGAGATTTCCTTCAATTTTTACTGCTGTTTTATTCGCAGCATCCTCCGCATTTAGCTGCTAGC---------------GGCTGTGGGTATGTTGCAAGCGGTGTGAGCAAGGGCGAGGAGGATAACATGGCCATCATCAAGGAGTTCATGCGCTTCAAGGTGCACATGGAGGGCTCCGTGAACGGC	ATGAGATTTCCTTCAATTTTTACTGCTGTTTTATTCGCAGCATCCTCCGCATTAGCTGCTAGCAAAAAAAAAAAAAAAGCAAGCGGTGTGAGCAAGGGCGAGGAGGATAACATGGCCATCATCAAGGAGTTCATGCGCTTCAAGGTGCACATGGAGGGCTCCGTGAACGGC
ATGAGATTTCCTTCAATTTTTACTGCTGTTTTATTCGCAGCATCCTCCGCATtTAGCTGCTAGC------------AGAGcctctcgacccgCAAGCGGTGTGAGCAAGGGCGAGGAGGATAACATGGCCATCATCAAGGAGTTCATGCGCTTCAAGGTGCACATGGAGGGCTCCGTGAACGGC	1	35	Insertion and Deletion	0	1		21	MRFPSIFTAVLFAASSAFSC*											MRFPSIFTAVLFAASSALAASKKKKKASGVSKGEEDNMAIIKEFMRFKVHMEGSVNG	ATGAGATTTCCTTCAATTTTTACTGCTGTTTTATTCGCAGCATCCTCCGCATTTAGCTGCTAGC------------AGAGCCTCTCGACCCGCAAGCGGTGTGAGCAAGGGCGAGGAGGATAACATGGCCATCATCAAGGAGTTCATGCGCTTCAAGGTGCACATGGAGGGCTCCGTGAACGGC	ATGAGATTTCCTTCAATTTTTACTGCTGTTTTATTCGCAGCATCCTCCGCATTAGCTGCTAGCAAAAAAAAAAAAAAAGCAAGCGGTGTGAGCAAGGGCGAGGAGGATAACATGGCCATCATCAAGGAGTTCATGCGCTTCAAGGTGCACATGGAGGGCTCCGTGAACGGC
ATGAGATTTCCTTCAATTTTTACTGCTGTTTTATTCGCAGCATCCTCCGCATtTAGCTGCTAGC-----------AAGtttgccaAGtttgCAAGCGGTGTGAGCAAGGGCGAGGAGGATAACATGGCCATCATCAAGGAGTTCATGCGCTTCAAGGTGCACATGGAGGGCTCCGTGAACGGC	1	32	Insertion and Deletion	0	1		21	MRFPSIFTAVLFAASSAFSC*											MRFPSIFTAVLFAASSALAASKKKKKASGVSKGEEDNMAIIKEFMRFKVHMEGSVNG	ATGAGATTTCCTTCAATTTTTACTGCTGTTTTATTCGCAGCATCCTCCGCATTTAGCTGCTAGC-----------AAGTTTGCCAAGTTTGCAAGCGGTGTGAGCAAGGGCGAGGAGGATAACATGGCCATCATCAAGGAGTTCATGCGCTTCAAGGTGCACATGGAGGGCTCCGTGAACGGC	ATGAGATTTCCTTCAATTTTTACTGCTGTTTTATTCGCAGCATCCTCCGCATTAGCTGCTAGCAAAAAAAAAAAAAAAGCAAGCGGTGTGAGCAAGGGCGAGGAGGATAACATGGCCATCATCAAGGAGTTCATGCGCTTCAAGGTGCACATGGAGGGCTCCGTGAACGGC
ATGAGATTTCCTTCAATTTTTACTGCTGTTTTATTCGCAGCATCCTCCGCATtTAGCTGCTAGC---------CACCAAGcgacccccgCAAGCGGTGTGAGCAAGGGCGAGGAGGATAACATGGCCATCATCAAGGAGTTCATGCGCTTCAAGGTGCACATGGAGGGCTCCGTGAACGGC	1	35	Insertion and Deletion	0	1		21	MRFPSIFTAVLFAASSAFSC*											MRFPSIFTAVLFAASSALAASKKKKKASGVSKGEEDNMAIIKEFMRFKVHMEGSVNG	ATGAGATTTCCTTCAATTTTTACTGCTGTTTTATTCGCAGCATCCTCCGCATTTAGCTGCTAGC---------CACCAAGCGACCCCCGCAAGCGGTGTGAGCAAGGGCGAGGAGGATAACATGGCCATCATCAAGGAGTTCATGCGCTTCAAGGTGCACATGGAGGGCTCCGTGAACGGC	ATGAGATTTCCTTCAATTTTTACTGCTGTTTTATTCGCAGCATCCTCCGCATTAGCTGCTAGCAAAAAAAAAAAAAAAGCAAGCGGTGTGAGCAAGGGCGAGGAGGATAACATGGCCATCATCAAGGAGTTCATGCGCTTCAAGGTGCACATGGAGGGCTCCGTGAACGGC
ATGAGATTTCCTTCAATTTTTACTGCTGTTTTATTCGCAGCATCCTCCGCATtTAGCTGCTAGCAACCGAAGAGCGCTGGCAAGCGGTGTGAGCAAGGGCGAGGAGGATAACATGGCCATCATCAAGGAGTTCATGCGCTTCAAGGTGCACATGGAGGGCTCCGTGAACGGC	1	33	Insertion	0	1		21	MRFPSIFTAVLFAASSAFSC*											MRFPSIFTAVLFAASSALAASKKKKKASGVSKGEEDNMAIIKEFMRFKVHMEGSVNG	ATGAGATTTCCTTCAATTTTTACTGCTGTTTTATTCGCAGCATCCTCCGCATTTAGCTGCTAGCAACCGAAGAGCGCTGGCAAGCGGTGTGAGCAAGGGCGAGGAGGATAACATGGCCATCATCAAGGAGTTCATGCGCTTCAAGGTGCACATGGAGGGCTCCGTGAACGGC	ATGAGATTTCCTTCAATTTTTACTGCTGTTTTATTCGCAGCATCCTCCGCATTAGCTGCTAGCAAAAAAAAAAAAAAAGCAAGCGGTGTGAGCAAGGGCGAGGAGGATAACATGGCCATCATCAAGGAGTTCATGCGCTTCAAGGTGCACATGGAGGGCTCCGTGAACGGC
ATGAGATTTCCTTCAATTTTTACTGCTGTTTTATTCGCAGCATCCTCCGCATtTAGCTGCTAGCAATCGGACATTCAATGCAAGCGGTGTGAGCAAGGGCGAGGAGGATAACATGGCCATCATCAAGGAGTTCATGCGCTTCAAGGTGCACATGGAGGGCTCCGTGAACGGC	1	31	Insertion	0	1		21	MRFPSIFTAVLFAASSAFSC*											MRFPSIFTAVLFAASSALAASKKKKKASGVSKGEEDNMAIIKEFMRFKVHMEGSVNG	ATGAGATTTCCTTCAATTTTTACTGCTGTTTTATTCGCAGCATCCTCCGCATTTAGCTGCTAGCAATCGGACATTCAATGCAAGCGGTGTGAGCAAGGGCGAGGAGGATAACATGGCCATCATCAAGGAGTTCATGCGCTTCAAGGTGCACATGGAGGGCTCCGTGAACGGC	ATGAGATTTCCTTCAATTTTTACTGCTGTTTTATTCGCAGCATCCTCCGCATTAGCTGCTAGCAAAAAAAAAAAAAAAGCAAGCGGTGTGAGCAAGGGCGAGGAGGATAACATGGCCATCATCAAGGAGTTCATGCGCTTCAAGGTGCACATGGAGGGCTCCGTGAACGGC
ATGAGATTTCCTTCAATTTTTACTGCTGTTTTATTCGCAGCATCCTCCGCATtTAGCTGCTAGCATTATGTTCAACTAGGCAAGCGGTGTGAGCAAGGGCGAGGAGGATAACATGGCCATCATCAAGGAGTTCATGCGCTTCAAGGTGCACATGGAGGGCTCCGTGAACGGC	1	35	Insertion	0	1		21	MRFPSIFTAVLFAASSAFSC*											MRFPSIFTAVLFAASSALAASKKKKKASGVSKGEEDNMAIIKEFMRFKVHMEGSVNG	ATGAGATTTCCTTCAATTTTTACTGCTGTTTTATTCGCAGCATCCTCCGCATTTAGCTGCTAGCATTATGTTCAACTAGGCAAGCGGTGTGAGCAAGGGCGAGGAGGATAACATGGCCATCATCAAGGAGTTCATGCGCTTCAAGGTGCACATGGAGGGCTCCGTGAACGGC	ATGAGATTTCCTTCAATTTTTACTGCTGTTTTATTCGCAGCATCCTCCGCATTAGCTGCTAGCAAAAAAAAAAAAAAAGCAAGCGGTGTGAGCAAGGGCGAGGAGGATAACATGGCCATCATCAAGGAGTTCATGCGCTTCAAGGTGCACATGGAGGGCTCCGTGAACGGC
ATGAGATTTCCTTCAATTTTTACTGCTGTTTTATTCGCAGCATCCTCCGCATtTAGCTGCTAGCATTTTCAGAAATCTCGCAAGCGGTGTGAGCAAGGGCGAGGAGGATAACATGGCCATCATCAAGGAGTTCATGCGCTTCAAGGTGCACATGGAGGGCTCCGTGAACGGC	1	34	Insertion	0	1		21	MRFPSIFTAVLFAASSAFSC*											MRFPSIFTAVLFAASSALAASKKKKKASGVSKGEEDNMAIIKEFMRFKVHMEGSVNG	ATGAGATTTCCTTCAATTTTTACTGCTGTTTTATTCGCAGCATCCTCCGCATTTAGCTGCTAGCATTTTCAGAAATCTCGCAAGCGGTGTGAGCAAGGGCGAGGAGGATAACATGGCCATCATCAAGGAGTTCATGCGCTTCAAGGTGCACATGGAGGGCTCCGTGAACGGC	ATGAGATTTCCTTCAATTTTTACTGCTGTTTTATTCGCAGCATCCTCCGCATTAGCTGCTAGCAAAAAAAAAAAAAAAGCAAGCGGTGTGAGCAAGGGCGAGGAGGATAACATGGCCATCATCAAGGAGTTCATGCGCTTCAAGGTGCACATGGAGGGCTCCGTGAACGGC
ATGAGATTTCCTTCAATTTTTACTGCTGTTTTATTCGCAGCATCCTCCGCATtTAGCTGCTAGccctgttttctctgC--------------TGCAAGCGGTGTGAGCAAGGGCGAGGAGGATAACATGGCCATCATCAAGGAGTTCATGCGCTTCAAGGTGCACATGGAGGGCTCCGTGAACGGC	1	36	Insertion and Deletion	0	1		21	MRFPSIFTAVLFAASSAFSC*											MRFPSIFTAVLFAASSALAASKKKKKASGVSKGEEDNMAIIKEFMRFKVHMEGSVNG	ATGAGATTTCCTTCAATTTTTACTGCTGTTTTATTCGCAGCATCCTCCGCATTTAGCTGCTAGCCCTGTTTTCTCTGC--------------TGCAAGCGGTGTGAGCAAGGGCGAGGAGGATAACATGGCCATCATCAAGGAGTTCATGCGCTTCAAGGTGCACATGGAGGGCTCCGTGAACGGC	ATGAGATTTCCTTCAATTTTTACTGCTGTTTTATTCGCAGCATCCTCCGCATTAGCTGCTAGCAAAAAAAAAAAAAAAGCAAGCGGTGTGAGCAAGGGCGAGGAGGATAACATGGCCATCATCAAGGAGTTCATGCGCTTCAAGGTGCACATGGAGGGCTCCGTGAACGGC
ATGAGATTTCCTTCAATTTTTACTGCTGTTTTATTCGCAGCATCCTCCGCATtTAGCTGCTAGCCTAGTTAATTCGAGAGCAAGCGGTGTGAGCAAGGGCGAGGAGGATAACATGGCCATCATCAAGGAGTTCATGCGCTTCAAGGTGCACATGGAGGGCTCCGTGAACGGC	1	35	Insertion	0	1		21	MRFPSIFTAVLFAASSAFSC*											MRFPSIFTAVLFAASSALAASKKKKKASGVSKGEEDNMAIIKEFMRFKVHMEGSVNG	ATGAGATTTCCTTCAATTTTTACTGCTGTTTTATTCGCAGCATCCTCCGCATTTAGCTGCTAGCCTAGTTAATTCGAGAGCAAGCGGTGTGAGCAAGGGCGAGGAGGATAACATGGCCATCATCAAGGAGTTCATGCGCTTCAAGGTGCACATGGAGGGCTCCGTGAACGGC	ATGAGATTTCCTTCAATTTTTACTGCTGTTTTATTCGCAGCATCCTCCGCATTAGCTGCTAGCAAAAAAAAAAAAAAAGCAAGCGGTGTGAGCAAGGGCGAGGAGGATAACATGGCCATCATCAAGGAGTTCATGCGCTTCAAGGTGCACATGGAGGGCTCCGTGAACGGC
ATGAGATTTCCTTCAATTTTTACTGCTGTTTTATTCGCAGCATCCTCCGCATtTAGCTGCTAGCgcgattagttgtgtc---------------GCAAGCGGTGTGAGCAAGGGCGAGGAGGATAACATGGCCATCATCAAGGAGTTCATGCGCTTCAAGGTGCACATGGAGGGCTCCGTGAACGGC	1	36	Insertion and Deletion	0	1		21	MRFPSIFTAVLFAASSAFSC*											MRFPSIFTAVLFAASSALAASKKKKKASGVSKGEEDNMAIIKEFMRFKVHMEGSVNG	ATGAGATTTCCTTCAATTTTTACTGCTGTTTTATTCGCAGCATCCTCCGCATTTAGCTGCTAGCGCGATTAGTTGTGTC---------------GCAAGCGGTGTGAGCAAGGGCGAGGAGGATAACATGGCCATCATCAAGGAGTTCATGCGCTTCAAGGTGCACATGGAGGGCTCCGTGAACGGC	ATGAGATTTCCTTCAATTTTTACTGCTGTTTTATTCGCAGCATCCTCCGCATTAGCTGCTAGCAAAAAAAAAAAAAAAGCAAGCGGTGTGAGCAAGGGCGAGGAGGATAACATGGCCATCATCAAGGAGTTCATGCGCTTCAAGGTGCACATGGAGGGCTCCGTGAACGGC
ATGAGATTTCCTTCAATTTTTACTGCTGTTTTATTCGCAGCATCCTCCGCATtTAGCTGCTAGCTAAAGCCAAAGGATTGCAAGCGGTGTGAGCAAGGGCGAGGAGGATAACATGGCCATCATCAAGGAGTTCATGCGCTTCAAGGTGCACATGGAGGGCTCCGTGAACGGC	1	35	Insertion	0	1		21	MRFPSIFTAVLFAASSAFSC*											MRFPSIFTAVLFAASSALAASKKKKKASGVSKGEEDNMAIIKEFMRFKVHMEGSVNG	ATGAGATTTCCTTCAATTTTTACTGCTGTTTTATTCGCAGCATCCTCCGCATTTAGCTGCTAGCTAAAGCCAAAGGATTGCAAGCGGTGTGAGCAAGGGCGAGGAGGATAACATGGCCATCATCAAGGAGTTCATGCGCTTCAAGGTGCACATGGAGGGCTCCGTGAACGGC	ATGAGATTTCCTTCAATTTTTACTGCTGTTTTATTCGCAGCATCCTCCGCATTAGCTGCTAGCAAAAAAAAAAAAAAAGCAAGCGGTGTGAGCAAGGGCGAGGAGGATAACATGGCCATCATCAAGGAGTTCATGCGCTTCAAGGTGCACATGGAGGGCTCCGTGAACGGC
ATGAGATTTCCTTCAATTTTTACTGCTGTTTTATTCGCAGCATCCTCCGCcATTAGCTGCTAGC-------GAAAGGAACgccgtcgCAAGCGGTGTGAGCAAGGGCGAGGAGGATAACATGGCCATCATCAAGGAGTTCATGCGCTTCAAGGTGCACATGGAGGGCTCCGTGAACGGC	1	33	Insertion and Deletion	0	1		21	MRFPSIFTAVLFAASSAISC*											MRFPSIFTAVLFAASSALAASKKKKKASGVSKGEEDNMAIIKEFMRFKVHMEGSVNG	ATGAGATTTCCTTCAATTTTTACTGCTGTTTTATTCGCAGCATCCTCCGCCATTAGCTGCTAGC-------GAAAGGAACGCCGTCGCAAGCGGTGTGAGCAAGGGCGAGGAGGATAACATGGCCATCATCAAGGAGTTCATGCGCTTCAAGGTGCACATGGAGGGCTCCGTGAACGGC	ATGAGATTTCCTTCAATTTTTACTGCTGTTTTATTCGCAGCATCCTCCGCATTAGCTGCTAGCAAAAAAAAAAAAAAAGCAAGCGGTGTGAGCAAGGGCGAGGAGGATAACATGGCCATCATCAAGGAGTTCATGCGCTTCAAGGTGCACATGGAGGGCTCCGTGAACGGC
ATGAGATTTCCTTCAATTTTTACTGCTGTTTTATTCGCAGCATCCTCCGCcATTAGCTGCTAGCGgggtgaggatgta-------------GGCAAGCGGTGTGAGCAAGGGCGAGGAGGATAACATGGCCATCATCAAGGAGTTCATGCGCTTCAAGGTGCACATGGAGGGCTCCGTGAACGGC	1	35	Insertion and Deletion	0	1		21	MRFPSIFTAVLFAASSAISC*											MRFPSIFTAVLFAASSALAASKKKKKASGVSKGEEDNMAIIKEFMRFKVHMEGSVNG	ATGAGATTTCCTTCAATTTTTACTGCTGTTTTATTCGCAGCATCCTCCGCCATTAGCTGCTAGCGGGGTGAGGATGTA-------------GGCAAGCGGTGTGAGCAAGGGCGAGGAGGATAACATGGCCATCATCAAGGAGTTCATGCGCTTCAAGGTGCACATGGAGGGCTCCGTGAACGGC	ATGAGATTTCCTTCAATTTTTACTGCTGTTTTATTCGCAGCATCCTCCGCATTAGCTGCTAGCAAAAAAAAAAAAAAAGCAAGCGGTGTGAGCAAGGGCGAGGAGGATAACATGGCCATCATCAAGGAGTTCATGCGCTTCAAGGTGCACATGGAGGGCTCCGTGAACGGC
ATGAGATTTCCTTCGATTTTTACTGCTGTTTTATTCGCAGCATCCTCCGCATTAGCTGCT------------TAACAGGCAAGCGGTGTGAGCAAGGGCGAGGAGGATAACATGGCCATCATCAAGGAGTTCATGCGCTTCAAGGTGCACATGGAGGGCTCCGTGAACGGC	1	36	Deletion	0	-12		21	MRFPSIFTAVLFAASSALAA*											MRFPSIFTAVLFAASSALAASKKKKKASGVSKGEEDNMAIIKEFMRFKVHMEGSVNG	ATGAGATTTCCTTCGATTTTTACTGCTGTTTTATTCGCAGCATCCTCCGCATTAGCTGCT------------TAACAGGCAAGCGGTGTGAGCAAGGGCGAGGAGGATAACATGGCCATCATCAAGGAGTTCATGCGCTTCAAGGTGCACATGGAGGGCTCCGTGAACGGC	ATGAGATTTCCTTCAATTTTTACTGCTGTTTTATTCGCAGCATCCTCCGCATTAGCTGCTAGCAAAAAAAAAAAAAAAGCAAGCGGTGTGAGCAAGGGCGAGGAGGATAACATGGCCATCATCAAGGAGTTCATGCGCTTCAAGGTGCACATGGAGGGCTCCGTGAACGGC
ATGAGATTTCCTTCAATTTTTACTGCTGTTTTATTCGCAGCATCCTCCGCATTAGCTGCTAGC-------------TAGttgagtgtatttgCAAGCGGTGTGAGCAAGGGCGAGGAGGATAACATGGCCATCATCAAGGAGTTCATGCGCTTCAAGGTGCACATGGAGGGCTCCGTGAACGGC	3	30	Insertion and Deletion	0.01	0		22	MRFPSIFTAVLFAASSALAAS*											MRFPSIFTAVLFAASSALAASKKKKKASGVSKGEEDNMAIIKEFMRFKVHMEGSVNG	ATGAGATTTCCTTCAATTTTTACTGCTGTTTTATTCGCAGCATCCTCCGCATTAGCTGCTAGC-------------TAGTTGAGTGTATTTGCAAGCGGTGTGAGCAAGGGCGAGGAGGATAACATGGCCATCATCAAGGAGTTCATGCGCTTCAAGGTGCACATGGAGGGCTCCGTGAACGGC	ATGAGATTTCCTTCAATTTTTACTGCTGTTTTATTCGCAGCATCCTCCGCATTAGCTGCTAGCAAAAAAAAAAAAAAAGCAAGCGGTGTGAGCAAGGGCGAGGAGGATAACATGGCCATCATCAAGGAGTTCATGCGCTTCAAGGTGCACATGGAGGGCTCCGTGAACGGC
ATGAGATTTCCTTCAATTTTTACTGCTGTTTTATTCGCAGCATCCTCCGCATTAGCTGCTAGC-------------TAGcattgtcactgcgCAAGCGGTGTGAGCAAGGGCGAGGAGGATAACATGGCCATCATCAAGGAGTTCATGCGCTTCAAGGTGCACATGGAGGGCTCCGTGAACGGC	2	31	Insertion and Deletion	0	0		22	MRFPSIFTAVLFAASSALAAS*											MRFPSIFTAVLFAASSALAASKKKKKASGVSKGEEDNMAIIKEFMRFKVHMEGSVNG	ATGAGATTTCCTTCAATTTTTACTGCTGTTTTATTCGCAGCATCCTCCGCATTAGCTGCTAGC-------------TAGCATTGTCACTGCGCAAGCGGTGTGAGCAAGGGCGAGGAGGATAACATGGCCATCATCAAGGAGTTCATGCGCTTCAAGGTGCACATGGAGGGCTCCGTGAACGGC	ATGAGATTTCCTTCAATTTTTACTGCTGTTTTATTCGCAGCATCCTCCGCATTAGCTGCTAGCAAAAAAAAAAAAAAAGCAAGCGGTGTGAGCAAGGGCGAGGAGGATAACATGGCCATCATCAAGGAGTTCATGCGCTTCAAGGTGCACATGGAGGGCTCCGTGAACGGC
ATGAGATTTCCTTCAATTTTTACTGCTGTTTTATTCGCAGCATCCTCCGCATTAGCTGCTAGC-------------TAGCtctcacgtgctgccAAGCGGTGTGAGCAAGGGCGAGGAGGATAACATGGCCATCATCAAGGAGTTCATGCGCTTCAAGGTGCACATGGAGGGCTCCGTGAACGGC	2	30	Insertion and Deletion	0	1		22	MRFPSIFTAVLFAASSALAAS*											MRFPSIFTAVLFAASSALAASKKKKKASGVSKGEEDNMAIIKEFMRFKVHMEGSVNG	ATGAGATTTCCTTCAATTTTTACTGCTGTTTTATTCGCAGCATCCTCCGCATTAGCTGCTAGC-------------TAGCTCTCACGTGCTGCCAAGCGGTGTGAGCAAGGGCGAGGAGGATAACATGGCCATCATCAAGGAGTTCATGCGCTTCAAGGTGCACATGGAGGGCTCCGTGAACGGC	ATGAGATTTCCTTCAATTTTTACTGCTGTTTTATTCGCAGCATCCTCCGCATTAGCTGCTAGCAAAAAAAAAAAAAAAGCAAGCGGTGTGAGCAAGGGCGAGGAGGATAACATGGCCATCATCAAGGAGTTCATGCGCTTCAAGGTGCACATGGAGGGCTCCGTGAACGGC
ATGAGATTTCCTTCAATTTTTACTGCTGTTTTATTCGCAGCATCCTCCGCATTAGCTGCTAGC-------------TAGtctacacgtctcgCAAGCGGTGTGAGCAAGGGCGAGGAGGATAACATGGCCATCATCAAGGAGTTCATGCGCTTCAAGGTGCACATGGAGGGCTCCGTGAACGGC	2	35	Insertion and Deletion	0	0		22	MRFPSIFTAVLFAASSALAAS*											MRFPSIFTAVLFAASSALAASKKKKKASGVSKGEEDNMAIIKEFMRFKVHMEGSVNG	ATGAGATTTCCTTCAATTTTTACTGCTGTTTTATTCGCAGCATCCTCCGCATTAGCTGCTAGC-------------TAGTCTACACGTCTCGCAAGCGGTGTGAGCAAGGGCGAGGAGGATAACATGGCCATCATCAAGGAGTTCATGCGCTTCAAGGTGCACATGGAGGGCTCCGTGAACGGC	ATGAGATTTCCTTCAATTTTTACTGCTGTTTTATTCGCAGCATCCTCCGCATTAGCTGCTAGCAAAAAAAAAAAAAAAGCAAGCGGTGTGAGCAAGGGCGAGGAGGATAACATGGCCATCATCAAGGAGTTCATGCGCTTCAAGGTGCACATGGAGGGCTCCGTGAACGGC
ATGAGATTTCCTTCAATTTTTACTGCTGTTTTATTCGCAGCATCCTCCGCATTAGCTGCTAGC------------TAGttggtgctcgtaGCAAGCGGTGTGAGCAAGGGCGAGGAGGATAACATGGCCATCATCAAGGAGTTCATGCGCTTCAAGGTGCACATGGAGGGCTCCGTGAACGGC	2	33	Insertion and Deletion	0	0		22	MRFPSIFTAVLFAASSALAAS*											MRFPSIFTAVLFAASSALAASKKKKKASGVSKGEEDNMAIIKEFMRFKVHMEGSVNG	ATGAGATTTCCTTCAATTTTTACTGCTGTTTTATTCGCAGCATCCTCCGCATTAGCTGCTAGC------------TAGTTGGTGCTCGTAGCAAGCGGTGTGAGCAAGGGCGAGGAGGATAACATGGCCATCATCAAGGAGTTCATGCGCTTCAAGGTGCACATGGAGGGCTCCGTGAACGGC	ATGAGATTTCCTTCAATTTTTACTGCTGTTTTATTCGCAGCATCCTCCGCATTAGCTGCTAGCAAAAAAAAAAAAAAAGCAAGCGGTGTGAGCAAGGGCGAGGAGGATAACATGGCCATCATCAAGGAGTTCATGCGCTTCAAGGTGCACATGGAGGGCTCCGTGAACGGC
ATGAGATTTCCTTCAATTTTTACTGCTGTTTTATTCGCAGCATCCTCCGCATTAGCTGCTAGC------------TGACgtactctcgttgCAAGCGGTGTGAGCAAGGGCGAGGAGGATAACATGGCCATCATCAAGGAGTTCATGCGCTTCAAGGTGCACATGGAGGGCTCCGTGAACGGC	2	32	Insertion and Deletion	0	0		22	MRFPSIFTAVLFAASSALAAS*											MRFPSIFTAVLFAASSALAASKKKKKASGVSKGEEDNMAIIKEFMRFKVHMEGSVNG	ATGAGATTTCCTTCAATTTTTACTGCTGTTTTATTCGCAGCATCCTCCGCATTAGCTGCTAGC------------TGACGTACTCTCGTTGCAAGCGGTGTGAGCAAGGGCGAGGAGGATAACATGGCCATCATCAAGGAGTTCATGCGCTTCAAGGTGCACATGGAGGGCTCCGTGAACGGC	ATGAGATTTCCTTCAATTTTTACTGCTGTTTTATTCGCAGCATCCTCCGCATTAGCTGCTAGCAAAAAAAAAAAAAAAGCAAGCGGTGTGAGCAAGGGCGAGGAGGATAACATGGCCATCATCAAGGAGTTCATGCGCTTCAAGGTGCACATGGAGGGCTCCGTGAACGGC
ATGAGATTTCCTTCAATTTTTACTGCTGTTTTATTCGCAGCATCCTCCGCATTAGCTGCTAGC------------TGAGcctaccggtctgCAAGCGGTGTGAGCAAGGGCGAGGAGGATAACATGGCCATCATCAAGGAGTTCATGCGCTTCAAGGTGCACATGGAGGGCTCCGTGAACGGC	2	32	Insertion and Deletion	0	0		22	MRFPSIFTAVLFAASSALAAS*											MRFPSIFTAVLFAASSALAASKKKKKASGVSKGEEDNMAIIKEFMRFKVHMEGSVNG	ATGAGATTTCCTTCAATTTTTACTGCTGTTTTATTCGCAGCATCCTCCGCATTAGCTGCTAGC------------TGAGCCTACCGGTCTGCAAGCGGTGTGAGCAAGGGCGAGGAGGATAACATGGCCATCATCAAGGAGTTCATGCGCTTCAAGGTGCACATGGAGGGCTCCGTGAACGGC	ATGAGATTTCCTTCAATTTTTACTGCTGTTTTATTCGCAGCATCCTCCGCATTAGCTGCTAGCAAAAAAAAAAAAAAAGCAAGCGGTGTGAGCAAGGGCGAGGAGGATAACATGGCCATCATCAAGGAGTTCATGCGCTTCAAGGTGCACATGGAGGGCTCCGTGAACGGC
ATGAGATTTCCTTCAATTTTTACTGCTGTTTTATTCGCAGCATCCTCCGCATTAGCTGCTAGC-----------TGAAGgggtatctgggCAAGCGGTGTGAGCAAGGGCGAGGAGGATAACATGGCCATCATCAAGGAGTTCATGCGCTTCAAGGTGCACATGGAGGGCTCCGTGAACGGC	2	36	Insertion and Deletion	0	0		22	MRFPSIFTAVLFAASSALAAS*											MRFPSIFTAVLFAASSALAASKKKKKASGVSKGEEDNMAIIKEFMRFKVHMEGSVNG	ATGAGATTTCCTTCAATTTTTACTGCTGTTTTATTCGCAGCATCCTCCGCATTAGCTGCTAGC-----------TGAAGGGGTATCTGGGCAAGCGGTGTGAGCAAGGGCGAGGAGGATAACATGGCCATCATCAAGGAGTTCATGCGCTTCAAGGTGCACATGGAGGGCTCCGTGAACGGC	ATGAGATTTCCTTCAATTTTTACTGCTGTTTTATTCGCAGCATCCTCCGCATTAGCTGCTAGCAAAAAAAAAAAAAAAGCAAGCGGTGTGAGCAAGGGCGAGGAGGATAACATGGCCATCATCAAGGAGTTCATGCGCTTCAAGGTGCACATGGAGGGCTCCGTGAACGGC
ATGAGATTTCCTTCAATTTTTACTGCTGTTTTATTCGCAGCATCCTCCGCATTAGCTGCTAGC-----------TGAAGgtggcactgcgCAAGCGGTGTGAGCAAGGGCGAGGAGGATAACATGGCCATCATCAAGGAGTTCATGCGCTTCAAGGTGCACATGGAGGGCTCCGTGAACGGC	2	33	Insertion and Deletion	0	0		22	MRFPSIFTAVLFAASSALAAS*											MRFPSIFTAVLFAASSALAASKKKKKASGVSKGEEDNMAIIKEFMRFKVHMEGSVNG	ATGAGATTTCCTTCAATTTTTACTGCTGTTTTATTCGCAGCATCCTCCGCATTAGCTGCTAGC-----------TGAAGGTGGCACTGCGCAAGCGGTGTGAGCAAGGGCGAGGAGGATAACATGGCCATCATCAAGGAGTTCATGCGCTTCAAGGTGCACATGGAGGGCTCCGTGAACGGC	ATGAGATTTCCTTCAATTTTTACTGCTGTTTTATTCGCAGCATCCTCCGCATTAGCTGCTAGCAAAAAAAAAAAAAAAGCAAGCGGTGTGAGCAAGGGCGAGGAGGATAACATGGCCATCATCAAGGAGTTCATGCGCTTCAAGGTGCACATGGAGGGCTCCGTGAACGGC
ATGAGATTTCCTTCAATTTTTACTGCTGTTTTATTCGCAGCATCCTCCGCATTAGCTGCTAGC----------TAGAAGtggttagcggCAAGCGGTGTGAGCAAGGGCGAGGAGGATAACATGGCCATCATCAAGGAGTTCATGCGCTTCAAGGTGCACATGGAGGGCTCCGTGAACGGC	2	35	Insertion and Deletion	0	0		22	MRFPSIFTAVLFAASSALAAS*											MRFPSIFTAVLFAASSALAASKKKKKASGVSKGEEDNMAIIKEFMRFKVHMEGSVNG	ATGAGATTTCCTTCAATTTTTACTGCTGTTTTATTCGCAGCATCCTCCGCATTAGCTGCTAGC----------TAGAAGTGGTTAGCGGCAAGCGGTGTGAGCAAGGGCGAGGAGGATAACATGGCCATCATCAAGGAGTTCATGCGCTTCAAGGTGCACATGGAGGGCTCCGTGAACGGC	ATGAGATTTCCTTCAATTTTTACTGCTGTTTTATTCGCAGCATCCTCCGCATTAGCTGCTAGCAAAAAAAAAAAAAAAGCAAGCGGTGTGAGCAAGGGCGAGGAGGATAACATGGCCATCATCAAGGAGTTCATGCGCTTCAAGGTGCACATGGAGGGCTCCGTGAACGGC
ATGAGATTTCCTTCAATTTTTACTGCTGTTTTATTCGCAGCATCCTCCGCATTAGCTGCTAGC----------TGAAGtctacccggaGCAAGCGGTGTGAGCAAGGGCGAGGAGGATAACATGGCCATCATCAAGGAGTTCATGCGCTTCAAGGTGCACATGGAGGGCTCCGTGAACGGC	2	34	Insertion and Deletion	0	0		22	MRFPSIFTAVLFAASSALAAS*											MRFPSIFTAVLFAASSALAASKKKKKASGVSKGEEDNMAIIKEFMRFKVHMEGSVNG	ATGAGATTTCCTTCAATTTTTACTGCTGTTTTATTCGCAGCATCCTCCGCATTAGCTGCTAGC----------TGAAGTCTACCCGGAGCAAGCGGTGTGAGCAAGGGCGAGGAGGATAACATGGCCATCATCAAGGAGTTCATGCGCTTCAAGGTGCACATGGAGGGCTCCGTGAACGGC	ATGAGATTTCCTTCAATTTTTACTGCTGTTTTATTCGCAGCATCCTCCGCATTAGCTGCTAGCAAAAAAAAAAAAAAAGCAAGCGGTGTGAGCAAGGGCGAGGAGGATAACATGGCCATCATCAAGGAGTTCATGCGCTTCAAGGTGCACATGGAGGGCTCCGTGAACGGC
ATGAGATTTCCTTCAATTTTTACTGCTGTTTTATTCGCAGCATCCTCCGCATTAGCTGCTAGC---------TAGACccgcacttaCGCAAGCGGTGTGAGCAAGGGCGAGGAGGATAACATGGCCATCATCAAGGAGTTCATGCGCTTCAAGGTGCACATGGAGGGCTCCGTGAACGGC	2	35	Insertion and Deletion	0	0		22	MRFPSIFTAVLFAASSALAAS*											MRFPSIFTAVLFAASSALAASKKKKKASGVSKGEEDNMAIIKEFMRFKVHMEGSVNG	ATGAGATTTCCTTCAATTTTTACTGCTGTTTTATTCGCAGCATCCTCCGCATTAGCTGCTAGC---------TAGACCCGCACTTACGCAAGCGGTGTGAGCAAGGGCGAGGAGGATAACATGGCCATCATCAAGGAGTTCATGCGCTTCAAGGTGCACATGGAGGGCTCCGTGAACGGC	ATGAGATTTCCTTCAATTTTTACTGCTGTTTTATTCGCAGCATCCTCCGCATTAGCTGCTAGCAAAAAAAAAAAAAAAGCAAGCGGTGTGAGCAAGGGCGAGGAGGATAACATGGCCATCATCAAGGAGTTCATGCGCTTCAAGGTGCACATGGAGGGCTCCGTGAACGGC
ATGAGATTTCCTTCAATTTTTACTGCTGTTTTATTCGCAGCATCCTCCGCATTAGCTGCTAGC---------TAGATtgacgcccaCGCAAGCGGTGTGAGCAAGGGCGAGGAGGATAACATGGCCATCATCAAGGAGTTCATGCGCTTCAAGGTGCACATGGAGGGCTCCGTGAACGGC	2	35	Insertion and Deletion	0	0		22	MRFPSIFTAVLFAASSALAAS*											MRFPSIFTAVLFAASSALAASKKKKKASGVSKGEEDNMAIIKEFMRFKVHMEGSVNG	ATGAGATTTCCTTCAATTTTTACTGCTGTTTTATTCGCAGCATCCTCCGCATTAGCTGCTAGC---------TAGATTGACGCCCACGCAAGCGGTGTGAGCAAGGGCGAGGAGGATAACATGGCCATCATCAAGGAGTTCATGCGCTTCAAGGTGCACATGGAGGGCTCCGTGAACGGC	ATGAGATTTCCTTCAATTTTTACTGCTGTTTTATTCGCAGCATCCTCCGCATTAGCTGCTAGCAAAAAAAAAAAAAAAGCAAGCGGTGTGAGCAAGGGCGAGGAGGATAACATGGCCATCATCAAGGAGTTCATGCGCTTCAAGGTGCACATGGAGGGCTCCGTGAACGGC
ATGAGATTTCCTTCAATTTTTACTGCTGTTTTATTCGCAGCATCCTCCGCATTAGCTGCTAGC---------TAGgatggtttaAGGGCAAGCGGTGTGAGCAAGGGCGAGGAGGATAACATGGCCATCATCAAGGAGTTCATGCGCTTCAAGGTGCACATGGAGGGCTCCGTGAACGGC	2	32	Insertion and Deletion	0	0		22	MRFPSIFTAVLFAASSALAAS*											MRFPSIFTAVLFAASSALAASKKKKKASGVSKGEEDNMAIIKEFMRFKVHMEGSVNG	ATGAGATTTCCTTCAATTTTTACTGCTGTTTTATTCGCAGCATCCTCCGCATTAGCTGCTAGC---------TAGGATGGTTTAAGGGCAAGCGGTGTGAGCAAGGGCGAGGAGGATAACATGGCCATCATCAAGGAGTTCATGCGCTTCAAGGTGCACATGGAGGGCTCCGTGAACGGC	ATGAGATTTCCTTCAATTTTTACTGCTGTTTTATTCGCAGCATCCTCCGCATTAGCTGCTAGCAAAAAAAAAAAAAAAGCAAGCGGTGTGAGCAAGGGCGAGGAGGATAACATGGCCATCATCAAGGAGTTCATGCGCTTCAAGGTGCACATGGAGGGCTCCGTGAACGGC
ATGAGATTTCCTTCAATTTTTACTGCTGTTTTATTCGCAGCATCCTCCGCATTAGCTGCTAGC---------TGAAGcttatgttaAGCAAGCGGTGTGAGCAAGGGCGAGGAGGATAACATGGCCATCATCAAGGAGTTCATGCGCTTCAAGGTGCACATGGAGGGCTCCGTGAACGGC	2	36	Insertion and Deletion	0	0		22	MRFPSIFTAVLFAASSALAAS*											MRFPSIFTAVLFAASSALAASKKKKKASGVSKGEEDNMAIIKEFMRFKVHMEGSVNG	ATGAGATTTCCTTCAATTTTTACTGCTGTTTTATTCGCAGCATCCTCCGCATTAGCTGCTAGC---------TGAAGCTTATGTTAAGCAAGCGGTGTGAGCAAGGGCGAGGAGGATAACATGGCCATCATCAAGGAGTTCATGCGCTTCAAGGTGCACATGGAGGGCTCCGTGAACGGC	ATGAGATTTCCTTCAATTTTTACTGCTGTTTTATTCGCAGCATCCTCCGCATTAGCTGCTAGCAAAAAAAAAAAAAAAGCAAGCGGTGTGAGCAAGGGCGAGGAGGATAACATGGCCATCATCAAGGAGTTCATGCGCTTCAAGGTGCACATGGAGGGCTCCGTGAACGGC
ATGAGATTTCCTTCAATTTTTACTGCTGTTTTATTCGCAGCATCCTCCGCATTAGCTGCTAGC-------TAAAAACAGgcttcggCAAGCGGTGTGAGCAAGGGCGAGGAGGATAACATGGCCATCATCAAGGAGTTCATGCGCTTCAAGGTGCACATGGAGGGCTCCGTGAACGGC	2	35	Insertion and Deletion	0	0		22	MRFPSIFTAVLFAASSALAAS*											MRFPSIFTAVLFAASSALAASKKKKKASGVSKGEEDNMAIIKEFMRFKVHMEGSVNG	ATGAGATTTCCTTCAATTTTTACTGCTGTTTTATTCGCAGCATCCTCCGCATTAGCTGCTAGC-------TAAAAACAGGCTTCGGCAAGCGGTGTGAGCAAGGGCGAGGAGGATAACATGGCCATCATCAAGGAGTTCATGCGCTTCAAGGTGCACATGGAGGGCTCCGTGAACGGC	ATGAGATTTCCTTCAATTTTTACTGCTGTTTTATTCGCAGCATCCTCCGCATTAGCTGCTAGCAAAAAAAAAAAAAAAGCAAGCGGTGTGAGCAAGGGCGAGGAGGATAACATGGCCATCATCAAGGAGTTCATGCGCTTCAAGGTGCACATGGAGGGCTCCGTGAACGGC
ATGAGATTTCCTTCAATTTTTACTGCTGTTTTATTCGCAGCATCCTCCGCATTAGCTGCTAGC-------TAAATATATtcttgtgCAAGCGGTGTGAGCAAGGGCGAGGAGGATAACATGGCCATCATCAAGGAGTTCATGCGCTTCAAGGTGCACATGGAGGGCTCCGTGAACGGC	2	36	Insertion and Deletion	0	0		22	MRFPSIFTAVLFAASSALAAS*											MRFPSIFTAVLFAASSALAASKKKKKASGVSKGEEDNMAIIKEFMRFKVHMEGSVNG	ATGAGATTTCCTTCAATTTTTACTGCTGTTTTATTCGCAGCATCCTCCGCATTAGCTGCTAGC-------TAAATATATTCTTGTGCAAGCGGTGTGAGCAAGGGCGAGGAGGATAACATGGCCATCATCAAGGAGTTCATGCGCTTCAAGGTGCACATGGAGGGCTCCGTGAACGGC	ATGAGATTTCCTTCAATTTTTACTGCTGTTTTATTCGCAGCATCCTCCGCATTAGCTGCTAGCAAAAAAAAAAAAAAAGCAAGCGGTGTGAGCAAGGGCGAGGAGGATAACATGGCCATCATCAAGGAGTTCATGCGCTTCAAGGTGCACATGGAGGGCTCCGTGAACGGC
ATGAGATTTCCTTCAATTTTTACTGCTGTTTTATTCGCAGCATCCTCCGCATTAGCTGCTAGCTAAAACCGTAAAGTTGCAAGCGGTGTGAGCAAGGGCGAGGAGGATAACATGGCCATCATCAAGGAGTTCATGCGCTTCAAGGTGCACATGGAGGGCTCCGTGAACGGC	2	36	8 Base Changes	0	0		22	MRFPSIFTAVLFAASSALAAS*											MRFPSIFTAVLFAASSALAASKKKKKASGVSKGEEDNMAIIKEFMRFKVHMEGSVNG	ATGAGATTTCCTTCAATTTTTACTGCTGTTTTATTCGCAGCATCCTCCGCATTAGCTGCTAGCTAAAACCGTAAAGTTGCAAGCGGTGTGAGCAAGGGCGAGGAGGATAACATGGCCATCATCAAGGAGTTCATGCGCTTCAAGGTGCACATGGAGGGCTCCGTGAACGGC	ATGAGATTTCCTTCAATTTTTACTGCTGTTTTATTCGCAGCATCCTCCGCATTAGCTGCTAGCAAAAAAAAAAAAAAAGCAAGCGGTGTGAGCAAGGGCGAGGAGGATAACATGGCCATCATCAAGGAGTTCATGCGCTTCAAGGTGCACATGGAGGGCTCCGTGAACGGC
ATGAGATTTCCTTCAATTTTTACTGCTGTTTTATTCGCAGCATCCTCCGCATTAGCTGCTAGCTAAAACTAAGTATCAGCAAGCGGTGTGAGCAAGGGCGAGGAGGATAACATGGCCATCATCAAGGAGTTCATGCGCTTCAAGGTGCACATGGAGGGCTCCGTGAACGGC	2	35	7 Base Changes	0	0		22	MRFPSIFTAVLFAASSALAAS*											MRFPSIFTAVLFAASSALAASKKKKKASGVSKGEEDNMAIIKEFMRFKVHMEGSVNG	ATGAGATTTCCTTCAATTTTTACTGCTGTTTTATTCGCAGCATCCTCCGCATTAGCTGCTAGCTAAAACTAAGTATCAGCAAGCGGTGTGAGCAAGGGCGAGGAGGATAACATGGCCATCATCAAGGAGTTCATGCGCTTCAAGGTGCACATGGAGGGCTCCGTGAACGGC	ATGAGATTTCCTTCAATTTTTACTGCTGTTTTATTCGCAGCATCCTCCGCATTAGCTGCTAGCAAAAAAAAAAAAAAAGCAAGCGGTGTGAGCAAGGGCGAGGAGGATAACATGGCCATCATCAAGGAGTTCATGCGCTTCAAGGTGCACATGGAGGGCTCCGTGAACGGC
ATGAGATTTCCTTCAATTTTTACTGCTGTTTTATTCGCAGCATCCTCCGCATTAGCTGCTAGCTAAAAGACGAAATCAGCAAGCGGTGTGAGCAAGGGCGAGGAGGATAACATGGCCATCATCAAGGAGTTCATGCGCTTCAAGGTGCACATGGAGGGCTCCGTGAACGGC	2	35	6 Base Changes	0	0		22	MRFPSIFTAVLFAASSALAAS*											MRFPSIFTAVLFAASSALAASKKKKKASGVSKGEEDNMAIIKEFMRFKVHMEGSVNG	ATGAGATTTCCTTCAATTTTTACTGCTGTTTTATTCGCAGCATCCTCCGCATTAGCTGCTAGCTAAAAGACGAAATCAGCAAGCGGTGTGAGCAAGGGCGAGGAGGATAACATGGCCATCATCAAGGAGTTCATGCGCTTCAAGGTGCACATGGAGGGCTCCGTGAACGGC	ATGAGATTTCCTTCAATTTTTACTGCTGTTTTATTCGCAGCATCCTCCGCATTAGCTGCTAGCAAAAAAAAAAAAAAAGCAAGCGGTGTGAGCAAGGGCGAGGAGGATAACATGGCCATCATCAAGGAGTTCATGCGCTTCAAGGTGCACATGGAGGGCTCCGTGAACGGC
ATGAGATTTCCTTCAATTTTTACTGCTGTTTTATTCGCAGCATCCTCCGCATTAGCTGCTAGCTAAACCGCACCATCCGCAAGCGGTGTGAGCAAGGGCGAGGAGGATAACATGGCCATCATCAAGGAGTTCATGCGCTTCAAGGTGCACATGGAGGGCTCCGTGAACGGC	2	31	10 Base Changes	0	0		22	MRFPSIFTAVLFAASSALAAS*											MRFPSIFTAVLFAASSALAASKKKKKASGVSKGEEDNMAIIKEFMRFKVHMEGSVNG	ATGAGATTTCCTTCAATTTTTACTGCTGTTTTATTCGCAGCATCCTCCGCATTAGCTGCTAGCTAAACCGCACCATCCGCAAGCGGTGTGAGCAAGGGCGAGGAGGATAACATGGCCATCATCAAGGAGTTCATGCGCTTCAAGGTGCACATGGAGGGCTCCGTGAACGGC	ATGAGATTTCCTTCAATTTTTACTGCTGTTTTATTCGCAGCATCCTCCGCATTAGCTGCTAGCAAAAAAAAAAAAAAAGCAAGCGGTGTGAGCAAGGGCGAGGAGGATAACATGGCCATCATCAAGGAGTTCATGCGCTTCAAGGTGCACATGGAGGGCTCCGTGAACGGC
ATGAGATTTCCTTCAATTTTTACTGCTGTTTTATTCGCAGCATCCTCCGCATTAGCTGCTAGCTAAACTGAAAACCAGGCAAGCGGTGTGAGCAAGGGCGAGGAGGATAACATGGCCATCATCAAGGAGTTCATGCGCTTCAAGGTGCACATGGAGGGCTCCGTGAACGGC	2	35	7 Base Changes	0	0		22	MRFPSIFTAVLFAASSALAAS*											MRFPSIFTAVLFAASSALAASKKKKKASGVSKGEEDNMAIIKEFMRFKVHMEGSVNG	ATGAGATTTCCTTCAATTTTTACTGCTGTTTTATTCGCAGCATCCTCCGCATTAGCTGCTAGCTAAACTGAAAACCAGGCAAGCGGTGTGAGCAAGGGCGAGGAGGATAACATGGCCATCATCAAGGAGTTCATGCGCTTCAAGGTGCACATGGAGGGCTCCGTGAACGGC	ATGAGATTTCCTTCAATTTTTACTGCTGTTTTATTCGCAGCATCCTCCGCATTAGCTGCTAGCAAAAAAAAAAAAAAAGCAAGCGGTGTGAGCAAGGGCGAGGAGGATAACATGGCCATCATCAAGGAGTTCATGCGCTTCAAGGTGCACATGGAGGGCTCCGTGAACGGC
ATGAGATTTCCTTCAATTTTTACTGCTGTTTTATTCGCAGCATCCTCCGCATTAGCTGCTAGCTAAAGAGTGTAACCTGCAAGCGGTGTGAGCAAGGGCGAGGAGGATAACATGGCCATCATCAAGGAGTTCATGCGCTTCAAGGTGCACATGGAGGGCTCCGTGAACGGC	2	33	9 Base Changes	0	0		22	MRFPSIFTAVLFAASSALAAS*											MRFPSIFTAVLFAASSALAASKKKKKASGVSKGEEDNMAIIKEFMRFKVHMEGSVNG	ATGAGATTTCCTTCAATTTTTACTGCTGTTTTATTCGCAGCATCCTCCGCATTAGCTGCTAGCTAAAGAGTGTAACCTGCAAGCGGTGTGAGCAAGGGCGAGGAGGATAACATGGCCATCATCAAGGAGTTCATGCGCTTCAAGGTGCACATGGAGGGCTCCGTGAACGGC	ATGAGATTTCCTTCAATTTTTACTGCTGTTTTATTCGCAGCATCCTCCGCATTAGCTGCTAGCAAAAAAAAAAAAAAAGCAAGCGGTGTGAGCAAGGGCGAGGAGGATAACATGGCCATCATCAAGGAGTTCATGCGCTTCAAGGTGCACATGGAGGGCTCCGTGAACGGC
ATGAGATTTCCTTCAATTTTTACTGCTGTTTTATTCGCAGCATCCTCCGCATTAGCTGCTAGCTAAATACTCCACTAGGCAAGCGGTGTGAGCAAGGGCGAGGAGGATAACATGGCCATCATCAAGGAGTTCATGCGCTTCAAGGTGCACATGGAGGGCTCCGTGAACGGC	2	33	9 Base Changes	0	0		22	MRFPSIFTAVLFAASSALAAS*											MRFPSIFTAVLFAASSALAASKKKKKASGVSKGEEDNMAIIKEFMRFKVHMEGSVNG	ATGAGATTTCCTTCAATTTTTACTGCTGTTTTATTCGCAGCATCCTCCGCATTAGCTGCTAGCTAAATACTCCACTAGGCAAGCGGTGTGAGCAAGGGCGAGGAGGATAACATGGCCATCATCAAGGAGTTCATGCGCTTCAAGGTGCACATGGAGGGCTCCGTGAACGGC	ATGAGATTTCCTTCAATTTTTACTGCTGTTTTATTCGCAGCATCCTCCGCATTAGCTGCTAGCAAAAAAAAAAAAAAAGCAAGCGGTGTGAGCAAGGGCGAGGAGGATAACATGGCCATCATCAAGGAGTTCATGCGCTTCAAGGTGCACATGGAGGGCTCCGTGAACGGC
ATGAGATTTCCTTCAATTTTTACTGCTGTTTTATTCGCAGCATCCTCCGCATTAGCTGCTAGCTAAGAAGATACGGGAGCAAGCGGTGTGAGCAAGGGCGAGGAGGATAACATGGCCATCATCAAGGAGTTCATGCGCTTCAAGGTGCACATGGAGGGCTCCGTGAACGGC	2	35	8 Base Changes	0	0		22	MRFPSIFTAVLFAASSALAAS*											MRFPSIFTAVLFAASSALAASKKKKKASGVSKGEEDNMAIIKEFMRFKVHMEGSVNG	ATGAGATTTCCTTCAATTTTTACTGCTGTTTTATTCGCAGCATCCTCCGCATTAGCTGCTAGCTAAGAAGATACGGGAGCAAGCGGTGTGAGCAAGGGCGAGGAGGATAACATGGCCATCATCAAGGAGTTCATGCGCTTCAAGGTGCACATGGAGGGCTCCGTGAACGGC	ATGAGATTTCCTTCAATTTTTACTGCTGTTTTATTCGCAGCATCCTCCGCATTAGCTGCTAGCAAAAAAAAAAAAAAAGCAAGCGGTGTGAGCAAGGGCGAGGAGGATAACATGGCCATCATCAAGGAGTTCATGCGCTTCAAGGTGCACATGGAGGGCTCCGTGAACGGC
ATGAGATTTCCTTCAATTTTTACTGCTGTTTTATTCGCAGCATCCTCCGCATTAGCTGCTAGCTAGAGCACTCATCCCGCAAGCGGTGTGAGCAAGGGCGAGGAGGATAACATGGCCATCATCAAGGAGTTCATGCGCTTCAAGGTGCACATGGAGGGCTCCGTGAACGGC	2	34	11 Base Changes	0	0		22	MRFPSIFTAVLFAASSALAAS*											MRFPSIFTAVLFAASSALAASKKKKKASGVSKGEEDNMAIIKEFMRFKVHMEGSVNG	ATGAGATTTCCTTCAATTTTTACTGCTGTTTTATTCGCAGCATCCTCCGCATTAGCTGCTAGCTAGAGCACTCATCCCGCAAGCGGTGTGAGCAAGGGCGAGGAGGATAACATGGCCATCATCAAGGAGTTCATGCGCTTCAAGGTGCACATGGAGGGCTCCGTGAACGGC	ATGAGATTTCCTTCAATTTTTACTGCTGTTTTATTCGCAGCATCCTCCGCATTAGCTGCTAGCAAAAAAAAAAAAAAAGCAAGCGGTGTGAGCAAGGGCGAGGAGGATAACATGGCCATCATCAAGGAGTTCATGCGCTTCAAGGTGCACATGGAGGGCTCCGTGAACGGC
ATGAGATTTCCTTCAATTTTTACTGCTGTTTTATTCGCAGCATCCTCCGCATTAGCTGCTAGCTAGAGCCGATAACTAGCAAGCGGTGTGAGCAAGGGCGAGGAGGATAACATGGCCATCATCAAGGAGTTCATGCGCTTCAAGGTGCACATGGAGGGCTCCGTGAACGGC	2	34	9 Base Changes	0	0		22	MRFPSIFTAVLFAASSALAAS*											MRFPSIFTAVLFAASSALAASKKKKKASGVSKGEEDNMAIIKEFMRFKVHMEGSVNG	ATGAGATTTCCTTCAATTTTTACTGCTGTTTTATTCGCAGCATCCTCCGCATTAGCTGCTAGCTAGAGCCGATAACTAGCAAGCGGTGTGAGCAAGGGCGAGGAGGATAACATGGCCATCATCAAGGAGTTCATGCGCTTCAAGGTGCACATGGAGGGCTCCGTGAACGGC	ATGAGATTTCCTTCAATTTTTACTGCTGTTTTATTCGCAGCATCCTCCGCATTAGCTGCTAGCAAAAAAAAAAAAAAAGCAAGCGGTGTGAGCAAGGGCGAGGAGGATAACATGGCCATCATCAAGGAGTTCATGCGCTTCAAGGTGCACATGGAGGGCTCCGTGAACGGC
ATGAGATTTCCTTCAATTTTTACTGCTGTTTTATTCGCAGCATCCTCCGCATTAGCTGCTAGCTAGCAATACTACCGGGCAAGCGGTGTGAGCAAGGGCGAGGAGGATAACATGGCCATCATCAAGGAGTTCATGCGCTTCAAGGTGCACATGGAGGGCTCCGTGAACGGC	2	35	10 Base Changes	0	0		22	MRFPSIFTAVLFAASSALAAS*											MRFPSIFTAVLFAASSALAASKKKKKASGVSKGEEDNMAIIKEFMRFKVHMEGSVNG	ATGAGATTTCCTTCAATTTTTACTGCTGTTTTATTCGCAGCATCCTCCGCATTAGCTGCTAGCTAGCAATACTACCGGGCAAGCGGTGTGAGCAAGGGCGAGGAGGATAACATGGCCATCATCAAGGAGTTCATGCGCTTCAAGGTGCACATGGAGGGCTCCGTGAACGGC	ATGAGATTTCCTTCAATTTTTACTGCTGTTTTATTCGCAGCATCCTCCGCATTAGCTGCTAGCAAAAAAAAAAAAAAAGCAAGCGGTGTGAGCAAGGGCGAGGAGGATAACATGGCCATCATCAAGGAGTTCATGCGCTTCAAGGTGCACATGGAGGGCTCCGTGAACGGC
ATGAGATTTCCTTCAATTTTTACTGCTGTTTTATTCGCAGCATCCTCCGCATTAGCTGCTAGCTAGCTCAACGCCCATGCAAGCGGTGTGAGCAAGGGCGAGGAGGATAACATGGCCATCATCAAGGAGTTCATGCGCTTCAAGGTGCACATGGAGGGCTCCGTGAACGGC	2	33	11 Base Changes	0	0		22	MRFPSIFTAVLFAASSALAAS*											MRFPSIFTAVLFAASSALAASKKKKKASGVSKGEEDNMAIIKEFMRFKVHMEGSVNG	ATGAGATTTCCTTCAATTTTTACTGCTGTTTTATTCGCAGCATCCTCCGCATTAGCTGCTAGCTAGCTCAACGCCCATGCAAGCGGTGTGAGCAAGGGCGAGGAGGATAACATGGCCATCATCAAGGAGTTCATGCGCTTCAAGGTGCACATGGAGGGCTCCGTGAACGGC	ATGAGATTTCCTTCAATTTTTACTGCTGTTTTATTCGCAGCATCCTCCGCATTAGCTGCTAGCAAAAAAAAAAAAAAAGCAAGCGGTGTGAGCAAGGGCGAGGAGGATAACATGGCCATCATCAAGGAGTTCATGCGCTTCAAGGTGCACATGGAGGGCTCCGTGAACGGC
ATGAGATTTCCTTCAATTTTTACTGCTGTTTTATTCGCAGCATCCTCCGCATTAGCTGCTAGCTAGGACCCCGATGAAGCAAGCGGTGTGAGCAAGGGCGAGGAGGATAACATGGCCATCATCAAGGAGTTCATGCGCTTCAAGGTGCACATGGAGGGCTCCGTGAACGGC	2	36	10 Base Changes	0	0		22	MRFPSIFTAVLFAASSALAAS*											MRFPSIFTAVLFAASSALAASKKKKKASGVSKGEEDNMAIIKEFMRFKVHMEGSVNG	ATGAGATTTCCTTCAATTTTTACTGCTGTTTTATTCGCAGCATCCTCCGCATTAGCTGCTAGCTAGGACCCCGATGAAGCAAGCGGTGTGAGCAAGGGCGAGGAGGATAACATGGCCATCATCAAGGAGTTCATGCGCTTCAAGGTGCACATGGAGGGCTCCGTGAACGGC	ATGAGATTTCCTTCAATTTTTACTGCTGTTTTATTCGCAGCATCCTCCGCATTAGCTGCTAGCAAAAAAAAAAAAAAAGCAAGCGGTGTGAGCAAGGGCGAGGAGGATAACATGGCCATCATCAAGGAGTTCATGCGCTTCAAGGTGCACATGGAGGGCTCCGTGAACGGC
ATGAGATTTCCTTCAATTTTTACTGCTGTTTTATTCGCAGCATCCTCCGCATTAGCTGCTAGCTAGGAGCCGAGGGAAGCAAGCGGTGTGAGCAAGGGCGAGGAGGATAACATGGCCATCATCAAGGAGTTCATGCGCTTCAAGGTGCACATGGAGGGCTCCGTGAACGGC	2	34	10 Base Changes	0	0		22	MRFPSIFTAVLFAASSALAAS*											MRFPSIFTAVLFAASSALAASKKKKKASGVSKGEEDNMAIIKEFMRFKVHMEGSVNG	ATGAGATTTCCTTCAATTTTTACTGCTGTTTTATTCGCAGCATCCTCCGCATTAGCTGCTAGCTAGGAGCCGAGGGAAGCAAGCGGTGTGAGCAAGGGCGAGGAGGATAACATGGCCATCATCAAGGAGTTCATGCGCTTCAAGGTGCACATGGAGGGCTCCGTGAACGGC	ATGAGATTTCCTTCAATTTTTACTGCTGTTTTATTCGCAGCATCCTCCGCATTAGCTGCTAGCAAAAAAAAAAAAAAAGCAAGCGGTGTGAGCAAGGGCGAGGAGGATAACATGGCCATCATCAAGGAGTTCATGCGCTTCAAGGTGCACATGGAGGGCTCCGTGAACGGC
ATGAGATTTCCTTCAATTTTTACTGCTGTTTTATTCGCAGCATCCTCCGCATTAGCTGCTAGCTAGGTACCTGACAGAGCAAGCGGTGTGAGCAAGGGCGAGGAGGATAACATGGCCATCATCAAGGAGTTCATGCGCTTCAAGGTGCACATGGAGGGCTCCGTGAACGGC	2	36	10 Base Changes	0	0		22	MRFPSIFTAVLFAASSALAAS*											MRFPSIFTAVLFAASSALAASKKKKKASGVSKGEEDNMAIIKEFMRFKVHMEGSVNG	ATGAGATTTCCTTCAATTTTTACTGCTGTTTTATTCGCAGCATCCTCCGCATTAGCTGCTAGCTAGGTACCTGACAGAGCAAGCGGTGTGAGCAAGGGCGAGGAGGATAACATGGCCATCATCAAGGAGTTCATGCGCTTCAAGGTGCACATGGAGGGCTCCGTGAACGGC	ATGAGATTTCCTTCAATTTTTACTGCTGTTTTATTCGCAGCATCCTCCGCATTAGCTGCTAGCAAAAAAAAAAAAAAAGCAAGCGGTGTGAGCAAGGGCGAGGAGGATAACATGGCCATCATCAAGGAGTTCATGCGCTTCAAGGTGCACATGGAGGGCTCCGTGAACGGC
ATGAGATTTCCTTCAATTTTTACTGCTGTTTTATTCGCAGCATCCTCCGCATTAGCTGCTAGCTAGGTTTATCACGATGCAAGCGGTGTGAGCAAGGGCGAGGAGGATAACATGGCCATCATCAAGGAGTTCATGCGCTTCAAGGTGCACATGGAGGGCTCCGTGAACGGC	2	36	11 Base Changes	0	0		22	MRFPSIFTAVLFAASSALAAS*											MRFPSIFTAVLFAASSALAASKKKKKASGVSKGEEDNMAIIKEFMRFKVHMEGSVNG	ATGAGATTTCCTTCAATTTTTACTGCTGTTTTATTCGCAGCATCCTCCGCATTAGCTGCTAGCTAGGTTTATCACGATGCAAGCGGTGTGAGCAAGGGCGAGGAGGATAACATGGCCATCATCAAGGAGTTCATGCGCTTCAAGGTGCACATGGAGGGCTCCGTGAACGGC	ATGAGATTTCCTTCAATTTTTACTGCTGTTTTATTCGCAGCATCCTCCGCATTAGCTGCTAGCAAAAAAAAAAAAAAAGCAAGCGGTGTGAGCAAGGGCGAGGAGGATAACATGGCCATCATCAAGGAGTTCATGCGCTTCAAGGTGCACATGGAGGGCTCCGTGAACGGC
ATGAGATTTCCTTCAATTTTTACTGCTGTTTTATTCGCAGCATCCTCCGCATTAGCTGCTAGCTGAA------------CACgggccggcgcgaGCGGTGTGAGCAAGGGCGAGGAGGATAACATGGCCATCATCAAGGAGTTCATGCGCTTCAAGGTGCACATGGAGGGCTCCGTGAACGGC	2	29	Insertion and Deletion	0	0		22	MRFPSIFTAVLFAASSALAAS*											MRFPSIFTAVLFAASSALAASKKKKKASGVSKGEEDNMAIIKEFMRFKVHMEGSVNG	ATGAGATTTCCTTCAATTTTTACTGCTGTTTTATTCGCAGCATCCTCCGCATTAGCTGCTAGCTGAA------------CACGGGCCGGCGCGAGCGGTGTGAGCAAGGGCGAGGAGGATAACATGGCCATCATCAAGGAGTTCATGCGCTTCAAGGTGCACATGGAGGGCTCCGTGAACGGC	ATGAGATTTCCTTCAATTTTTACTGCTGTTTTATTCGCAGCATCCTCCGCATTAGCTGCTAGCAAAAAAAAAAAAAAAGCAAGCGGTGTGAGCAAGGGCGAGGAGGATAACATGGCCATCATCAAGGAGTTCATGCGCTTCAAGGTGCACATGGAGGGCTCCGTGAACGGC
ATGAGATTTCCTTCAATTTTTACTGCTGTTTTATTCGCAGCATCCTCCGCATTAGCTGCTAGCTGAATCCAATAACTAGCAAGCGGTGTGAGCAAGGGCGAGGAGGATAACATGGCCATCATCAAGGAGTTCATGCGCTTCAAGGTGCACATGGAGGGCTCCGTGAACGGC	2	34	8 Base Changes	0	0		22	MRFPSIFTAVLFAASSALAAS*											MRFPSIFTAVLFAASSALAASKKKKKASGVSKGEEDNMAIIKEFMRFKVHMEGSVNG	ATGAGATTTCCTTCAATTTTTACTGCTGTTTTATTCGCAGCATCCTCCGCATTAGCTGCTAGCTGAATCCAATAACTAGCAAGCGGTGTGAGCAAGGGCGAGGAGGATAACATGGCCATCATCAAGGAGTTCATGCGCTTCAAGGTGCACATGGAGGGCTCCGTGAACGGC	ATGAGATTTCCTTCAATTTTTACTGCTGTTTTATTCGCAGCATCCTCCGCATTAGCTGCTAGCAAAAAAAAAAAAAAAGCAAGCGGTGTGAGCAAGGGCGAGGAGGATAACATGGCCATCATCAAGGAGTTCATGCGCTTCAAGGTGCACATGGAGGGCTCCGTGAACGGC
ATGAGATTTCCTTCAATTTTTACTGCTGTTTTATTCGCAGCATCCTCCGCATTAGCTGCTAGCTGAATGTATACCATGGCAAGCGGTGTGAGCAAGGGCGAGGAGGATAACATGGCCATCATCAAGGAGTTCATGCGCTTCAAGGTGCACATGGAGGGCTCCGTGAACGGC	2	36	10 Base Changes	0	0		22	MRFPSIFTAVLFAASSALAAS*											MRFPSIFTAVLFAASSALAASKKKKKASGVSKGEEDNMAIIKEFMRFKVHMEGSVNG	ATGAGATTTCCTTCAATTTTTACTGCTGTTTTATTCGCAGCATCCTCCGCATTAGCTGCTAGCTGAATGTATACCATGGCAAGCGGTGTGAGCAAGGGCGAGGAGGATAACATGGCCATCATCAAGGAGTTCATGCGCTTCAAGGTGCACATGGAGGGCTCCGTGAACGGC	ATGAGATTTCCTTCAATTTTTACTGCTGTTTTATTCGCAGCATCCTCCGCATTAGCTGCTAGCAAAAAAAAAAAAAAAGCAAGCGGTGTGAGCAAGGGCGAGGAGGATAACATGGCCATCATCAAGGAGTTCATGCGCTTCAAGGTGCACATGGAGGGCTCCGTGAACGGC
ATGAGATTTCCTTCAATTTTTACTGCTGTTTTATTCGCAGCATCCTCCGCATTAGCTGCTAGCTGAATTTTGTACATAGCAAGCGGTGTGAGCAAGGGCGAGGAGGATAACATGGCCATCATCAAGGAGTTCATGCGCTTCAAGGTGCACATGGAGGGCTCCGTGAACGGC	2	35	10 Base Changes	0	0		22	MRFPSIFTAVLFAASSALAAS*											MRFPSIFTAVLFAASSALAASKKKKKASGVSKGEEDNMAIIKEFMRFKVHMEGSVNG	ATGAGATTTCCTTCAATTTTTACTGCTGTTTTATTCGCAGCATCCTCCGCATTAGCTGCTAGCTGAATTTTGTACATAGCAAGCGGTGTGAGCAAGGGCGAGGAGGATAACATGGCCATCATCAAGGAGTTCATGCGCTTCAAGGTGCACATGGAGGGCTCCGTGAACGGC	ATGAGATTTCCTTCAATTTTTACTGCTGTTTTATTCGCAGCATCCTCCGCATTAGCTGCTAGCAAAAAAAAAAAAAAAGCAAGCGGTGTGAGCAAGGGCGAGGAGGATAACATGGCCATCATCAAGGAGTTCATGCGCTTCAAGGTGCACATGGAGGGCTCCGTGAACGGC
ATGAGATTTCCTTCAATTTTTACTGCTGTTTTATTCGCAGCATCCTCCGCATTAGCTGCTAGCTGACACAAACAAGCCGCAAGCGGTGTGAGCAAGGGCGAGGAGGATAACATGGCCATCATCAAGGAGTTCATGCGCTTCAAGGTGCACATGGAGGGCTCCGTGAACGGC	2	31	8 Base Changes	0	0		22	MRFPSIFTAVLFAASSALAAS*											MRFPSIFTAVLFAASSALAASKKKKKASGVSKGEEDNMAIIKEFMRFKVHMEGSVNG	ATGAGATTTCCTTCAATTTTTACTGCTGTTTTATTCGCAGCATCCTCCGCATTAGCTGCTAGCTGACACAAACAAGCCGCAAGCGGTGTGAGCAAGGGCGAGGAGGATAACATGGCCATCATCAAGGAGTTCATGCGCTTCAAGGTGCACATGGAGGGCTCCGTGAACGGC	ATGAGATTTCCTTCAATTTTTACTGCTGTTTTATTCGCAGCATCCTCCGCATTAGCTGCTAGCAAAAAAAAAAAAAAAGCAAGCGGTGTGAGCAAGGGCGAGGAGGATAACATGGCCATCATCAAGGAGTTCATGCGCTTCAAGGTGCACATGGAGGGCTCCGTGAACGGC
ATGAGATTTCCTTCAATTTTTACTGCTGTTTTATTCGCAGCATCCTCCGCATTAGCTGCTAGCtgacattgtagggtc---------------GCAAGCGGTGTGAGCAAGGGCGAGGAGGATAACATGGCCATCATCAAGGAGTTCATGCGCTTCAAGGTGCACATGGAGGGCTCCGTGAACGGC	2	35	Insertion and Deletion	0	0		22	MRFPSIFTAVLFAASSALAAS*											MRFPSIFTAVLFAASSALAASKKKKKASGVSKGEEDNMAIIKEFMRFKVHMEGSVNG	ATGAGATTTCCTTCAATTTTTACTGCTGTTTTATTCGCAGCATCCTCCGCATTAGCTGCTAGCTGACATTGTAGGGTC---------------GCAAGCGGTGTGAGCAAGGGCGAGGAGGATAACATGGCCATCATCAAGGAGTTCATGCGCTTCAAGGTGCACATGGAGGGCTCCGTGAACGGC	ATGAGATTTCCTTCAATTTTTACTGCTGTTTTATTCGCAGCATCCTCCGCATTAGCTGCTAGCAAAAAAAAAAAAAAAGCAAGCGGTGTGAGCAAGGGCGAGGAGGATAACATGGCCATCATCAAGGAGTTCATGCGCTTCAAGGTGCACATGGAGGGCTCCGTGAACGGC
ATGAGATTTCCTTCAATTTTTACTGCTGTTTTATTCGCAGCATCCTCCGCATTAGCTGCTAGCTGACCCAGAAAAGATGCAAGCGGTGTGAGCAAGGGCGAGGAGGATAACATGGCCATCATCAAGGAGTTCATGCGCTTCAAGGTGCACATGGAGGGCTCCGTGAACGGC	2	35	8 Base Changes	0	0		22	MRFPSIFTAVLFAASSALAAS*											MRFPSIFTAVLFAASSALAASKKKKKASGVSKGEEDNMAIIKEFMRFKVHMEGSVNG	ATGAGATTTCCTTCAATTTTTACTGCTGTTTTATTCGCAGCATCCTCCGCATTAGCTGCTAGCTGACCCAGAAAAGATGCAAGCGGTGTGAGCAAGGGCGAGGAGGATAACATGGCCATCATCAAGGAGTTCATGCGCTTCAAGGTGCACATGGAGGGCTCCGTGAACGGC	ATGAGATTTCCTTCAATTTTTACTGCTGTTTTATTCGCAGCATCCTCCGCATTAGCTGCTAGCAAAAAAAAAAAAAAAGCAAGCGGTGTGAGCAAGGGCGAGGAGGATAACATGGCCATCATCAAGGAGTTCATGCGCTTCAAGGTGCACATGGAGGGCTCCGTGAACGGC
ATGAGATTTCCTTCAATTTTTACTGCTGTTTTATTCGCAGCATCCTCCGCATTAGCTGCTAGCTGACTTGAATATGAGGCcAAGCGGTGTGAGCAAGGGCGAGGAGGATAACATGGCCATCATCAAGGAGTTCATGCGCTTCAAGGTGCACATGGAGGGCTCCGTGAACGGC	2	36	Insertion	0	1		22	MRFPSIFTAVLFAASSALAAS*											MRFPSIFTAVLFAASSALAASKKKKKASGVSKGEEDNMAIIKEFMRFKVHMEGSVNG	ATGAGATTTCCTTCAATTTTTACTGCTGTTTTATTCGCAGCATCCTCCGCATTAGCTGCTAGCTGACTTGAATATGAGGCCAAGCGGTGTGAGCAAGGGCGAGGAGGATAACATGGCCATCATCAAGGAGTTCATGCGCTTCAAGGTGCACATGGAGGGCTCCGTGAACGGC	ATGAGATTTCCTTCAATTTTTACTGCTGTTTTATTCGCAGCATCCTCCGCATTAGCTGCTAGCAAAAAAAAAAAAAAAGCAAGCGGTGTGAGCAAGGGCGAGGAGGATAACATGGCCATCATCAAGGAGTTCATGCGCTTCAAGGTGCACATGGAGGGCTCCGTGAACGGC
ATGAGATTTCCTTCAATTTTTACTGCTGTTTTATTCGCAGCATCCTCCGCATTAGCTGCTAGCTGAGCCAATTTCCAAGCAAGCGGTGTGAGCAAGGGCGAGGAGGATAACATGGCCATCATCAAGGAGTTCATGCGCTTCAAGGTGCACATGGAGGGCTCCGTGAACGGC	2	35	10 Base Changes	0	0		22	MRFPSIFTAVLFAASSALAAS*											MRFPSIFTAVLFAASSALAASKKKKKASGVSKGEEDNMAIIKEFMRFKVHMEGSVNG	ATGAGATTTCCTTCAATTTTTACTGCTGTTTTATTCGCAGCATCCTCCGCATTAGCTGCTAGCTGAGCCAATTTCCAAGCAAGCGGTGTGAGCAAGGGCGAGGAGGATAACATGGCCATCATCAAGGAGTTCATGCGCTTCAAGGTGCACATGGAGGGCTCCGTGAACGGC	ATGAGATTTCCTTCAATTTTTACTGCTGTTTTATTCGCAGCATCCTCCGCATTAGCTGCTAGCAAAAAAAAAAAAAAAGCAAGCGGTGTGAGCAAGGGCGAGGAGGATAACATGGCCATCATCAAGGAGTTCATGCGCTTCAAGGTGCACATGGAGGGCTCCGTGAACGGC
ATGAGATTTCCTTCAATTTTTACTGCTGTTTTATTCGCAGCATCCTCCGCATTAGCTGCTAGCTgagcgccatgagga--------------GCAAGCGGTGTGAGCAAGGGCGAGGAGGATAACATGGCCATCATCAAGGAGTTCATGCGCTTCAAGGTGCACATGGAGGGCTCCGTGAACGGC	2	29	Insertion and Deletion	0	0		22	MRFPSIFTAVLFAASSALAAS*											MRFPSIFTAVLFAASSALAASKKKKKASGVSKGEEDNMAIIKEFMRFKVHMEGSVNG	ATGAGATTTCCTTCAATTTTTACTGCTGTTTTATTCGCAGCATCCTCCGCATTAGCTGCTAGCTGAGCGCCATGAGGA--------------GCAAGCGGTGTGAGCAAGGGCGAGGAGGATAACATGGCCATCATCAAGGAGTTCATGCGCTTCAAGGTGCACATGGAGGGCTCCGTGAACGGC	ATGAGATTTCCTTCAATTTTTACTGCTGTTTTATTCGCAGCATCCTCCGCATTAGCTGCTAGCAAAAAAAAAAAAAAAGCAAGCGGTGTGAGCAAGGGCGAGGAGGATAACATGGCCATCATCAAGGAGTTCATGCGCTTCAAGGTGCACATGGAGGGCTCCGTGAACGGC
ATGAGATTTCCTTCAATTTTTACTGCTGTTTTATTCGCAGCATCCTCCGCATTAGCTGCTAGctgagctccgtactgC---------------GCAAGCGGTGTGAGCAAGGGCGAGGAGGATAACATGGCCATCATCAAGGAGTTCATGCGCTTCAAGGTGCACATGGAGGGCTCCGTGAACGGC	2	35	Insertion and Deletion	0	0		22	MRFPSIFTAVLFAASSALAAS*											MRFPSIFTAVLFAASSALAASKKKKKASGVSKGEEDNMAIIKEFMRFKVHMEGSVNG	ATGAGATTTCCTTCAATTTTTACTGCTGTTTTATTCGCAGCATCCTCCGCATTAGCTGCTAGCTGAGCTCCGTACTGC---------------GCAAGCGGTGTGAGCAAGGGCGAGGAGGATAACATGGCCATCATCAAGGAGTTCATGCGCTTCAAGGTGCACATGGAGGGCTCCGTGAACGGC	ATGAGATTTCCTTCAATTTTTACTGCTGTTTTATTCGCAGCATCCTCCGCATTAGCTGCTAGCAAAAAAAAAAAAAAAGCAAGCGGTGTGAGCAAGGGCGAGGAGGATAACATGGCCATCATCAAGGAGTTCATGCGCTTCAAGGTGCACATGGAGGGCTCCGTGAACGGC
ATGAGATTTCCTTCAATTTTTACTGCTGTTTTATTCGCAGCATCCTCCGCATTAGCTGCTAGCTGAGTTACATTAGTCGCAAGCGGTGTGAGCAAGGGCGAGGAGGATAACATGGCCATCATCAAGGAGTTCATGCGCTTCAAGGTGCACATGGAGGGCTCCGTGAACGGC	2	34	11 Base Changes	0	0		22	MRFPSIFTAVLFAASSALAAS*											MRFPSIFTAVLFAASSALAASKKKKKASGVSKGEEDNMAIIKEFMRFKVHMEGSVNG	ATGAGATTTCCTTCAATTTTTACTGCTGTTTTATTCGCAGCATCCTCCGCATTAGCTGCTAGCTGAGTTACATTAGTCGCAAGCGGTGTGAGCAAGGGCGAGGAGGATAACATGGCCATCATCAAGGAGTTCATGCGCTTCAAGGTGCACATGGAGGGCTCCGTGAACGGC	ATGAGATTTCCTTCAATTTTTACTGCTGTTTTATTCGCAGCATCCTCCGCATTAGCTGCTAGCAAAAAAAAAAAAAAAGCAAGCGGTGTGAGCAAGGGCGAGGAGGATAACATGGCCATCATCAAGGAGTTCATGCGCTTCAAGGTGCACATGGAGGGCTCCGTGAACGGC
ATGAGATTTCCTTCAATTTTTACTGCTGTTTTATTCGCAGCATCCTCCGCATTAGCTGCTAGCtgatagttgggtgcc---------------GCAAGCGGTGTGAGCAAGGGCGAGGAGGATAACATGGCCATCATCAAGGAGTTCATGCGCTTCAAGGTGCACATGGAGGGCTCCGTGAACGGC	2	31	Insertion and Deletion	0	0		22	MRFPSIFTAVLFAASSALAAS*											MRFPSIFTAVLFAASSALAASKKKKKASGVSKGEEDNMAIIKEFMRFKVHMEGSVNG	ATGAGATTTCCTTCAATTTTTACTGCTGTTTTATTCGCAGCATCCTCCGCATTAGCTGCTAGCTGATAGTTGGGTGCC---------------GCAAGCGGTGTGAGCAAGGGCGAGGAGGATAACATGGCCATCATCAAGGAGTTCATGCGCTTCAAGGTGCACATGGAGGGCTCCGTGAACGGC	ATGAGATTTCCTTCAATTTTTACTGCTGTTTTATTCGCAGCATCCTCCGCATTAGCTGCTAGCAAAAAAAAAAAAAAAGCAAGCGGTGTGAGCAAGGGCGAGGAGGATAACATGGCCATCATCAAGGAGTTCATGCGCTTCAAGGTGCACATGGAGGGCTCCGTGAACGGC
ATGAGATTTCCTTCAATTTTTACTGCTGTTTTATTCGCAGCATCCTCCGCATTAGCTGCTAGCTgatcctgtcctga-------------GGCAAGCGGTGTGAGCAAGGGCGAGGAGGATAACATGGCCATCATCAAGGAGTTCATGCGCTTCAAGGTGCACATGGAGGGCTCCGTGAACGGC	2	35	Insertion and Deletion	0	0		22	MRFPSIFTAVLFAASSALAAS*											MRFPSIFTAVLFAASSALAASKKKKKASGVSKGEEDNMAIIKEFMRFKVHMEGSVNG	ATGAGATTTCCTTCAATTTTTACTGCTGTTTTATTCGCAGCATCCTCCGCATTAGCTGCTAGCTGATCCTGTCCTGA-------------GGCAAGCGGTGTGAGCAAGGGCGAGGAGGATAACATGGCCATCATCAAGGAGTTCATGCGCTTCAAGGTGCACATGGAGGGCTCCGTGAACGGC	ATGAGATTTCCTTCAATTTTTACTGCTGTTTTATTCGCAGCATCCTCCGCATTAGCTGCTAGCAAAAAAAAAAAAAAAGCAAGCGGTGTGAGCAAGGGCGAGGAGGATAACATGGCCATCATCAAGGAGTTCATGCGCTTCAAGGTGCACATGGAGGGCTCCGTGAACGGC
ATGAGATTTCCTTCAATTTTTACTGCTGTTTTATTCGCAGCATCCTCCGCATTAGCTGCTAGCTGATCTGAACTTAGTGCAAGCGGTGTGAGCAAGGGCGAGGAGGATAACATGGCCATCATCAAGGAGTTCATGCGCTTCAAGGTGCACATGGAGGGCTCCGTGAACGGC	2	33	11 Base Changes	0	0		22	MRFPSIFTAVLFAASSALAAS*											MRFPSIFTAVLFAASSALAASKKKKKASGVSKGEEDNMAIIKEFMRFKVHMEGSVNG	ATGAGATTTCCTTCAATTTTTACTGCTGTTTTATTCGCAGCATCCTCCGCATTAGCTGCTAGCTGATCTGAACTTAGTGCAAGCGGTGTGAGCAAGGGCGAGGAGGATAACATGGCCATCATCAAGGAGTTCATGCGCTTCAAGGTGCACATGGAGGGCTCCGTGAACGGC	ATGAGATTTCCTTCAATTTTTACTGCTGTTTTATTCGCAGCATCCTCCGCATTAGCTGCTAGCAAAAAAAAAAAAAAAGCAAGCGGTGTGAGCAAGGGCGAGGAGGATAACATGGCCATCATCAAGGAGTTCATGCGCTTCAAGGTGCACATGGAGGGCTCCGTGAACGGC
ATGAGATTTCCTTCAATTTTTACTGCTGTTTTATTCGCAGCATCCTCCGCATTAGCTGCTAGCTGATGGACGCTATACGCAAGCGgGTGTGAGCAAGGGCGAGGAGGATAACATGGCCATCATCAAGGAGTTCATGCGCTTCAAGGTGCACATGGAGGGCTCCGTGAACGGC	2	34	Insertion	0	1		22	MRFPSIFTAVLFAASSALAAS*											MRFPSIFTAVLFAASSALAASKKKKKASGVSKGEEDNMAIIKEFMRFKVHMEGSVNG	ATGAGATTTCCTTCAATTTTTACTGCTGTTTTATTCGCAGCATCCTCCGCATTAGCTGCTAGCTGATGGACGCTATACGCAAGCGGGTGTGAGCAAGGGCGAGGAGGATAACATGGCCATCATCAAGGAGTTCATGCGCTTCAAGGTGCACATGGAGGGCTCCGTGAACGGC	ATGAGATTTCCTTCAATTTTTACTGCTGTTTTATTCGCAGCATCCTCCGCATTAGCTGCTAGCAAAAAAAAAAAAAAAGCAAGCGGTGTGAGCAAGGGCGAGGAGGATAACATGGCCATCATCAAGGAGTTCATGCGCTTCAAGGTGCACATGGAGGGCTCCGTGAACGGC
ATGAGATTTCCTTCAATTTTTACTGCTGTTTTATTCGCAGCATCCTCCGCATTAGCTGCTAGCtgattgagtccc------------ATGGCAAGCGGTGTGAGCAAGGGCGAGGAGGATAACATGGCCATCATCAAGGAGTTCATGCGCTTCAAGGTGCACATGGAGGGCTCCGTGAACGGC	2	31	Insertion and Deletion	0	0		22	MRFPSIFTAVLFAASSALAAS*											MRFPSIFTAVLFAASSALAASKKKKKASGVSKGEEDNMAIIKEFMRFKVHMEGSVNG	ATGAGATTTCCTTCAATTTTTACTGCTGTTTTATTCGCAGCATCCTCCGCATTAGCTGCTAGCTGATTGAGTCCC------------ATGGCAAGCGGTGTGAGCAAGGGCGAGGAGGATAACATGGCCATCATCAAGGAGTTCATGCGCTTCAAGGTGCACATGGAGGGCTCCGTGAACGGC	ATGAGATTTCCTTCAATTTTTACTGCTGTTTTATTCGCAGCATCCTCCGCATTAGCTGCTAGCAAAAAAAAAAAAAAAGCAAGCGGTGTGAGCAAGGGCGAGGAGGATAACATGGCCATCATCAAGGAGTTCATGCGCTTCAAGGTGCACATGGAGGGCTCCGTGAACGGC
ATGAGATTTCCTTCAATTTTTACTGCTGTTTTATTCGCAGCATCCTCCGCATTAGCTGCTAGctgatttcgcaggtgC---------------GCAAGCGGTGTGAGCAAGGGCGAGGAGGATAACATGGCCATCATCAAGGAGTTCATGCGCTTCAAGGTGCACATGGAGGGCTCCGTGAACGGC	2	35	Insertion and Deletion	0	0		22	MRFPSIFTAVLFAASSALAAS*											MRFPSIFTAVLFAASSALAASKKKKKASGVSKGEEDNMAIIKEFMRFKVHMEGSVNG	ATGAGATTTCCTTCAATTTTTACTGCTGTTTTATTCGCAGCATCCTCCGCATTAGCTGCTAGCTGATTTCGCAGGTGC---------------GCAAGCGGTGTGAGCAAGGGCGAGGAGGATAACATGGCCATCATCAAGGAGTTCATGCGCTTCAAGGTGCACATGGAGGGCTCCGTGAACGGC	ATGAGATTTCCTTCAATTTTTACTGCTGTTTTATTCGCAGCATCCTCCGCATTAGCTGCTAGCAAAAAAAAAAAAAAAGCAAGCGGTGTGAGCAAGGGCGAGGAGGATAACATGGCCATCATCAAGGAGTTCATGCGCTTCAAGGTGCACATGGAGGGCTCCGTGAACGGC
ATGAGAATTCCTTCAATTTTTACTGCTGTTTTATTCGCAGCATCCTCCGCATTAGCTGCTAGC----------TGACAGtctgcgtgtgCAAGCGGTGTGAGCAAGGGCGAGGAGGATAACATGGCCATCATCAAGGAGTTCATGCGCTTCAAGGTGCACATGGAGGGCTCCGTGAACGGC	1	35	Insertion and Deletion	0	0		22	MRIPSIFTAVLFAASSALAAS*											MRFPSIFTAVLFAASSALAASKKKKKASGVSKGEEDNMAIIKEFMRFKVHMEGSVNG	ATGAGAATTCCTTCAATTTTTACTGCTGTTTTATTCGCAGCATCCTCCGCATTAGCTGCTAGC----------TGACAGTCTGCGTGTGCAAGCGGTGTGAGCAAGGGCGAGGAGGATAACATGGCCATCATCAAGGAGTTCATGCGCTTCAAGGTGCACATGGAGGGCTCCGTGAACGGC	ATGAGATTTCCTTCAATTTTTACTGCTGTTTTATTCGCAGCATCCTCCGCATTAGCTGCTAGCAAAAAAAAAAAAAAAGCAAGCGGTGTGAGCAAGGGCGAGGAGGATAACATGGCCATCATCAAGGAGTTCATGCGCTTCAAGGTGCACATGGAGGGCTCCGTGAACGGC
ATGAGATTCCCTTCAATTTTTACTGCTGTTTTATTCGCAGCATCCTCCGCATTAGCTGCTAGC------------TGATccactttatgtgCAAGCGGTGTGAGCAAGGGCGAGGAGGATAACATGGCCATCATCAAGGAGTTCATGCGCTTCAAGGTGCACATGGAGGGCTCCGTGAACGGC	1	35	Insertion and Deletion	0	0		22	MRFPSIFTAVLFAASSALAAS*											MRFPSIFTAVLFAASSALAASKKKKKASGVSKGEEDNMAIIKEFMRFKVHMEGSVNG	ATGAGATTCCCTTCAATTTTTACTGCTGTTTTATTCGCAGCATCCTCCGCATTAGCTGCTAGC------------TGATCCACTTTATGTGCAAGCGGTGTGAGCAAGGGCGAGGAGGATAACATGGCCATCATCAAGGAGTTCATGCGCTTCAAGGTGCACATGGAGGGCTCCGTGAACGGC	ATGAGATTTCCTTCAATTTTTACTGCTGTTTTATTCGCAGCATCCTCCGCATTAGCTGCTAGCAAAAAAAAAAAAAAAGCAAGCGGTGTGAGCAAGGGCGAGGAGGATAACATGGCCATCATCAAGGAGTTCATGCGCTTCAAGGTGCACATGGAGGGCTCCGTGAACGGC
ATGAGATTTAGTTCAATTTTTACTGCTGTTTTATTCGCAGCATCCTCCGCATTAGCTGCTAGCTAACAGACCACCCTAGCAAGCGGTGTGAGCAAGGGCGAGGAGGATAACATGGCCATCATCAAGGAGTTCATGCGCTTCAAGGTGCACATGGAGGGCTCCGTGAACGGC	1	34	11 Base Changes	0	0		22	MRFSSIFTAVLFAASSALAAS*											MRFPSIFTAVLFAASSALAASKKKKKASGVSKGEEDNMAIIKEFMRFKVHMEGSVNG	ATGAGATTTAGTTCAATTTTTACTGCTGTTTTATTCGCAGCATCCTCCGCATTAGCTGCTAGCTAACAGACCACCCTAGCAAGCGGTGTGAGCAAGGGCGAGGAGGATAACATGGCCATCATCAAGGAGTTCATGCGCTTCAAGGTGCACATGGAGGGCTCCGTGAACGGC	ATGAGATTTCCTTCAATTTTTACTGCTGTTTTATTCGCAGCATCCTCCGCATTAGCTGCTAGCAAAAAAAAAAAAAAAGCAAGCGGTGTGAGCAAGGGCGAGGAGGATAACATGGCCATCATCAAGGAGTTCATGCGCTTCAAGGTGCACATGGAGGGCTCCGTGAACGGC
ATGAGATTTCCCTCAATTTTTACTGCTGTTTTATTCGCAGCATCCTCCGCATTAGCTGCTAGC----------TAACACggcctccccgCAAGCGGTGTGAGCAAGGGCGAGGAGGATAACATGGCCATCATCAAGGAGTTCATGCGCTTCAAGGTGCACATGGAGGGCTCCGTGAACGGC	1	27	Insertion and Deletion	0	0		22	MRFPSIFTAVLFAASSALAAS*											MRFPSIFTAVLFAASSALAASKKKKKASGVSKGEEDNMAIIKEFMRFKVHMEGSVNG	ATGAGATTTCCCTCAATTTTTACTGCTGTTTTATTCGCAGCATCCTCCGCATTAGCTGCTAGC----------TAACACGGCCTCCCCGCAAGCGGTGTGAGCAAGGGCGAGGAGGATAACATGGCCATCATCAAGGAGTTCATGCGCTTCAAGGTGCACATGGAGGGCTCCGTGAACGGC	ATGAGATTTCCTTCAATTTTTACTGCTGTTTTATTCGCAGCATCCTCCGCATTAGCTGCTAGCAAAAAAAAAAAAAAAGCAAGCGGTGTGAGCAAGGGCGAGGAGGATAACATGGCCATCATCAAGGAGTTCATGCGCTTCAAGGTGCACATGGAGGGCTCCGTGAACGGC
ATGAGATTTCCTTCAATTTTTACTACTGTTTTATTCGCAGCATCCTCCGCATTAGCTGCTAGCTgatgcttga---------AAAATGCAAGCGGTGTGAGCAAGGGCGAGGAGGATAACATGGCCATCATCAAGGAGTTCATGCGCTTCAAGGTGCACATGGAGGGCTCCGTGAACGGC	1	27	Insertion and Deletion	0	0		22	MRFPSIFTTVLFAASSALAAS*											MRFPSIFTAVLFAASSALAASKKKKKASGVSKGEEDNMAIIKEFMRFKVHMEGSVNG	ATGAGATTTCCTTCAATTTTTACTACTGTTTTATTCGCAGCATCCTCCGCATTAGCTGCTAGCTGATGCTTGA---------AAAATGCAAGCGGTGTGAGCAAGGGCGAGGAGGATAACATGGCCATCATCAAGGAGTTCATGCGCTTCAAGGTGCACATGGAGGGCTCCGTGAACGGC	ATGAGATTTCCTTCAATTTTTACTGCTGTTTTATTCGCAGCATCCTCCGCATTAGCTGCTAGCAAAAAAAAAAAAAAAGCAAGCGGTGTGAGCAAGGGCGAGGAGGATAACATGGCCATCATCAAGGAGTTCATGCGCTTCAAGGTGCACATGGAGGGCTCCGTGAACGGC
ATGAGATTTCCTTCAATTTTTACTGATGTTTTATTCGCAGCATCCTCCGCATTAGCTGCTAGC-------------TAGttagtatttgtggCAAGCGGTGTGAGCAAGGGCGAGGAGGATAACATGGCCATCATCAAGGAGTTCATGCGCTTCAAGGTGCACATGGAGGGCTCCGTGAACGGC	1	35	Insertion and Deletion	0	0		22	MRFPSIFTDVLFAASSALAAS*											MRFPSIFTAVLFAASSALAASKKKKKASGVSKGEEDNMAIIKEFMRFKVHMEGSVNG	ATGAGATTTCCTTCAATTTTTACTGATGTTTTATTCGCAGCATCCTCCGCATTAGCTGCTAGC-------------TAGTTAGTATTTGTGGCAAGCGGTGTGAGCAAGGGCGAGGAGGATAACATGGCCATCATCAAGGAGTTCATGCGCTTCAAGGTGCACATGGAGGGCTCCGTGAACGGC	ATGAGATTTCCTTCAATTTTTACTGCTGTTTTATTCGCAGCATCCTCCGCATTAGCTGCTAGCAAAAAAAAAAAAAAAGCAAGCGGTGTGAGCAAGGGCGAGGAGGATAACATGGCCATCATCAAGGAGTTCATGCGCTTCAAGGTGCACATGGAGGGCTCCGTGAACGGC
ATGAGATTTCCTTCAATTTTTACTGATGTTTTATTCGCAGCATCCTCCGCATTAGCTGCTAGC--------TAGAAAACggcggtcgCAAGCGGTGTGAGCA------AGGAGGATAACATGGCCATCATCAAGGAGTTCATGCGCTTCAAGGTGCACATGGAGGGCTCCGTGAACGGC	1	38	Insertion and Deletion	0	-6		22	MRFPSIFTDVLFAASSALAAS*											MRFPSIFTAVLFAASSALAASKKKKKASGVSKGEEDNMAIIKEFMRFKVHMEGSVNG	ATGAGATTTCCTTCAATTTTTACTGATGTTTTATTCGCAGCATCCTCCGCATTAGCTGCTAGC--------TAGAAAACGGCGGTCGCAAGCGGTGTGAGCA------AGGAGGATAACATGGCCATCATCAAGGAGTTCATGCGCTTCAAGGTGCACATGGAGGGCTCCGTGAACGGC	ATGAGATTTCCTTCAATTTTTACTGCTGTTTTATTCGCAGCATCCTCCGCATTAGCTGCTAGCAAAAAAAAAAAAAAAGCAAGCGGTGTGAGCAAGGGCGAGGAGGATAACATGGCCATCATCAAGGAGTTCATGCGCTTCAAGGTGCACATGGAGGGCTCCGTGAACGGC
ATGAGATTTCCTTCAATTTTTACTGCCGTTTTATTCGCAGCATCCTCCGCATTAGCTGCTAGC-------TGAAAGcgtgccaATGCAAGCGGTGTGAGCAAGGGCGAGGAGGATAACATGGCCATCATCAAGGAGTTCATGCGCTTCAAGGTGCACATGGAGGGCTCCGTGAACGGC	1	29	Insertion and Deletion	0	0		22	MRFPSIFTAVLFAASSALAAS*											MRFPSIFTAVLFAASSALAASKKKKKASGVSKGEEDNMAIIKEFMRFKVHMEGSVNG	ATGAGATTTCCTTCAATTTTTACTGCCGTTTTATTCGCAGCATCCTCCGCATTAGCTGCTAGC-------TGAAAGCGTGCCAATGCAAGCGGTGTGAGCAAGGGCGAGGAGGATAACATGGCCATCATCAAGGAGTTCATGCGCTTCAAGGTGCACATGGAGGGCTCCGTGAACGGC	ATGAGATTTCCTTCAATTTTTACTGCTGTTTTATTCGCAGCATCCTCCGCATTAGCTGCTAGCAAAAAAAAAAAAAAAGCAAGCGGTGTGAGCAAGGGCGAGGAGGATAACATGGCCATCATCAAGGAGTTCATGCGCTTCAAGGTGCACATGGAGGGCTCCGTGAACGGC
ATGAGATTTCCTTCAATTTTTACTGCTGTCTTATTCGCAGCATCCTCCGCATTAGCTGCTAGctgactgggttggtgC---------------GCAAGCGGTGTGAGCAAGGGCGAGGAGGATAACATGGCCATCATCAAGGAGTTCATGCGCTTCAAGGTGCACATGGAGTGCTCCGTGAACGGC	1	24	Insertion and Deletion	0	0		22	MRFPSIFTAVLFAASSALAAS*											MRFPSIFTAVLFAASSALAASKKKKKASGVSKGEEDNMAIIKEFMRFKVHMEGSVNG	ATGAGATTTCCTTCAATTTTTACTGCTGTCTTATTCGCAGCATCCTCCGCATTAGCTGCTAGCTGACTGGGTTGGTGC---------------GCAAGCGGTGTGAGCAAGGGCGAGGAGGATAACATGGCCATCATCAAGGAGTTCATGCGCTTCAAGGTGCACATGGAGTGCTCCGTGAACGGC	ATGAGATTTCCTTCAATTTTTACTGCTGTTTTATTCGCAGCATCCTCCGCATTAGCTGCTAGCAAAAAAAAAAAAAAAGCAAGCGGTGTGAGCAAGGGCGAGGAGGATAACATGGCCATCATCAAGGAGTTCATGCGCTTCAAGGTGCACATGGAGGGCTCCGTGAACGGC
ATGAGATTTCCTTCAATTTTTACTGCTGTTCTATTCGCAGCATCCTCCGCATTAGCTGCTAGC------------TAAGtttgatggctcgCAAGCGGTGTGAGCAAGGGCGAGGAGGATAACATGGCCATCATCAAGGAGTTCATGCGCTTCAAGGTGCACATGGAGGGCTCCGTGAACGGC	1	35	Insertion and Deletion	0	0		22	MRFPSIFTAVLFAASSALAAS*											MRFPSIFTAVLFAASSALAASKKKKKASGVSKGEEDNMAIIKEFMRFKVHMEGSVNG	ATGAGATTTCCTTCAATTTTTACTGCTGTTCTATTCGCAGCATCCTCCGCATTAGCTGCTAGC------------TAAGTTTGATGGCTCGCAAGCGGTGTGAGCAAGGGCGAGGAGGATAACATGGCCATCATCAAGGAGTTCATGCGCTTCAAGGTGCACATGGAGGGCTCCGTGAACGGC	ATGAGATTTCCTTCAATTTTTACTGCTGTTTTATTCGCAGCATCCTCCGCATTAGCTGCTAGCAAAAAAAAAAAAAAAGCAAGCGGTGTGAGCAAGGGCGAGGAGGATAACATGGCCATCATCAAGGAGTTCATGCGCTTCAAGGTGCACATGGAGGGCTCCGTGAACGGC
ATGAGATTTCCTTCAATTTTTACTGCTGTTTTAATCGCAGCATCCTCCGCATTAGCTGCTAGCTGACGATTAAAAGAGGCAAGCGGTGTGAGCAAGGGCGAGGAGGATAACATGGCCATCATCAAGGAGTTCATGCGCTTCAAGGTGCACATGGAGGGCTCCGTGAACGGC	1	35	9 Base Changes	0	0		22	MRFPSIFTAVLIAASSALAAS*											MRFPSIFTAVLFAASSALAASKKKKKASGVSKGEEDNMAIIKEFMRFKVHMEGSVNG	ATGAGATTTCCTTCAATTTTTACTGCTGTTTTAATCGCAGCATCCTCCGCATTAGCTGCTAGCTGACGATTAAAAGAGGCAAGCGGTGTGAGCAAGGGCGAGGAGGATAACATGGCCATCATCAAGGAGTTCATGCGCTTCAAGGTGCACATGGAGGGCTCCGTGAACGGC	ATGAGATTTCCTTCAATTTTTACTGCTGTTTTATTCGCAGCATCCTCCGCATTAGCTGCTAGCAAAAAAAAAAAAAAAGCAAGCGGTGTGAGCAAGGGCGAGGAGGATAACATGGCCATCATCAAGGAGTTCATGCGCTTCAAGGTGCACATGGAGGGCTCCGTGAACGGC
ATGAGATTTCCTTCAATTTTTACTGCTGTTTTATTCGCACCATCCTCCGCATTAGCTGCTAGCTAGTTGATGATGGAGGCAAGCGGTGTGAGCAAGGGCGAGGAGGATAACATGGCCATCATCAAGGAGTTCATGCGCTTCAAGGTGCACATGGAGGGCTCCGTGAACGGC	1	35	12 Base Changes	0	0		22	MRFPSIFTAVLFAPSSALAAS*											MRFPSIFTAVLFAASSALAASKKKKKASGVSKGEEDNMAIIKEFMRFKVHMEGSVNG	ATGAGATTTCCTTCAATTTTTACTGCTGTTTTATTCGCACCATCCTCCGCATTAGCTGCTAGCTAGTTGATGATGGAGGCAAGCGGTGTGAGCAAGGGCGAGGAGGATAACATGGCCATCATCAAGGAGTTCATGCGCTTCAAGGTGCACATGGAGGGCTCCGTGAACGGC	ATGAGATTTCCTTCAATTTTTACTGCTGTTTTATTCGCAGCATCCTCCGCATTAGCTGCTAGCAAAAAAAAAAAAAAAGCAAGCGGTGTGAGCAAGGGCGAGGAGGATAACATGGCCATCATCAAGGAGTTCATGCGCTTCAAGGTGCACATGGAGGGCTCCGTGAACGGC
ATGAGATTTCCTTCAATTTTTACTGCTGTTTTATTCGCAGCATCCCCCGCATTAGCTGCTAGCTAATAGTAAATCTGAGCAAGCGGTGTGAGCAAGGGCGAGGAGGATAACATGGCCATCATCAAGGAGTTCATGCGCTTCAAGGTGCACATGGAGGGCTCCGTGAACGGC	1	34	9 Base Changes	0	0		22	MRFPSIFTAVLFAASPALAAS*											MRFPSIFTAVLFAASSALAASKKKKKASGVSKGEEDNMAIIKEFMRFKVHMEGSVNG	ATGAGATTTCCTTCAATTTTTACTGCTGTTTTATTCGCAGCATCCCCCGCATTAGCTGCTAGCTAATAGTAAATCTGAGCAAGCGGTGTGAGCAAGGGCGAGGAGGATAACATGGCCATCATCAAGGAGTTCATGCGCTTCAAGGTGCACATGGAGGGCTCCGTGAACGGC	ATGAGATTTCCTTCAATTTTTACTGCTGTTTTATTCGCAGCATCCTCCGCATTAGCTGCTAGCAAAAAAAAAAAAAAAGCAAGCGGTGTGAGCAAGGGCGAGGAGGATAACATGGCCATCATCAAGGAGTTCATGCGCTTCAAGGTGCACATGGAGGGCTCCGTGAACGGC
ATGAGATTTCCTTCAATTTTTACTGCTGTTTTATTCGCAGCATCCTCCG-------------------------GGAAGCAAGCGGTGTGAGCAAGGGCGAGGAGGATAACATGGCCATCATCAAGGAGTGCATGCGCATCAAGGTGCACATGGAGGGCTCCGTGAACGGC	1	24	Deletion	0	-25		22	MRFPSIFTAVLFAASSGKQAV*											MRFPSIFTAVLFAASSALAASKKKKKASGVSKGEEDNMAIIKEFMRFKVHMEGSVNG	ATGAGATTTCCTTCAATTTTTACTGCTGTTTTATTCGCAGCATCCTCCG-------------------------GGAAGCAAGCGGTGTGAGCAAGGGCGAGGAGGATAACATGGCCATCATCAAGGAGTGCATGCGCATCAAGGTGCACATGGAGGGCTCCGTGAACGGC	ATGAGATTTCCTTCAATTTTTACTGCTGTTTTATTCGCAGCATCCTCCGCATTAGCTGCTAGCAAAAAAAAAAAAAAAGCAAGCGGTGTGAGCAAGGGCGAGGAGGATAACATGGCCATCATCAAGGAGTTCATGCGCTTCAAGGTGCACATGGAGGGCTCCGTGAACGGC
ATGAGATTTCCTTCAATTTTTACTGCTGTTTTATTCGCAGCATCCTCCGCAATAGCTGCTAGCTgatgggtcga----------AGTTGCAAGCGGTGTGAGCAAGGGCGAGGAGGATAACATGGCCATCATCAAGGAGTTCATGCGCTTCAAGGTGCACATGGAGGGCTCCGTGAACGGC	1	22	Insertion and Deletion	0	0		22	MRFPSIFTAVLFAASSAIAAS*											MRFPSIFTAVLFAASSALAASKKKKKASGVSKGEEDNMAIIKEFMRFKVHMEGSVNG	ATGAGATTTCCTTCAATTTTTACTGCTGTTTTATTCGCAGCATCCTCCGCAATAGCTGCTAGCTGATGGGTCGA----------AGTTGCAAGCGGTGTGAGCAAGGGCGAGGAGGATAACATGGCCATCATCAAGGAGTTCATGCGCTTCAAGGTGCACATGGAGGGCTCCGTGAACGGC	ATGAGATTTCCTTCAATTTTTACTGCTGTTTTATTCGCAGCATCCTCCGCATTAGCTGCTAGCAAAAAAAAAAAAAAAGCAAGCGGTGTGAGCAAGGGCGAGGAGGATAACATGGCCATCATCAAGGAGTTCATGCGCTTCAAGGTGCACATGGAGGGCTCCGTGAACGGC
ATGAGATTTCCTTCAATTTTTACTGCTGTTTTATTCGCAGCATCCTCCGCACTAGCTGCTAGCTAACACCCAGCACGCGCAAGCGGTGTGAGCAAGGGCGAGGAGGATAACATGGCCATCATCAAGGAGTTCATGCGCTTCAAGGTGCACATGGAGGGCTCCGTGAACGGC	1	35	11 Base Changes	0	0		22	MRFPSIFTAVLFAASSALAAS*											MRFPSIFTAVLFAASSALAASKKKKKASGVSKGEEDNMAIIKEFMRFKVHMEGSVNG	ATGAGATTTCCTTCAATTTTTACTGCTGTTTTATTCGCAGCATCCTCCGCACTAGCTGCTAGCTAACACCCAGCACGCGCAAGCGGTGTGAGCAAGGGCGAGGAGGATAACATGGCCATCATCAAGGAGTTCATGCGCTTCAAGGTGCACATGGAGGGCTCCGTGAACGGC	ATGAGATTTCCTTCAATTTTTACTGCTGTTTTATTCGCAGCATCCTCCGCATTAGCTGCTAGCAAAAAAAAAAAAAAAGCAAGCGGTGTGAGCAAGGGCGAGGAGGATAACATGGCCATCATCAAGGAGTTCATGCGCTTCAAGGTGCACATGGAGGGCTCCGTGAACGGC
ATGAGATTTCCTTCAATTTTTACTGCTGTTTTATTCGCAGCATCCTCCGCATCAGCTGCTAGCTGATACCGGAGTGACGCAAGCGGTGTGAGCAAGGGCGAGGAGGATAACATGGCCATCATCAAGGAGTTCATGCGCTTCAAGGTGCACATGGAGGGCTCCGTGAACGGC	1	34	12 Base Changes	0	0		22	MRFPSIFTAVLFAASSASAAS*											MRFPSIFTAVLFAASSALAASKKKKKASGVSKGEEDNMAIIKEFMRFKVHMEGSVNG	ATGAGATTTCCTTCAATTTTTACTGCTGTTTTATTCGCAGCATCCTCCGCATCAGCTGCTAGCTGATACCGGAGTGACGCAAGCGGTGTGAGCAAGGGCGAGGAGGATAACATGGCCATCATCAAGGAGTTCATGCGCTTCAAGGTGCACATGGAGGGCTCCGTGAACGGC	ATGAGATTTCCTTCAATTTTTACTGCTGTTTTATTCGCAGCATCCTCCGCATTAGCTGCTAGCAAAAAAAAAAAAAAAGCAAGCGGTGTGAGCAAGGGCGAGGAGGATAACATGGCCATCATCAAGGAGTTCATGCGCTTCAAGGTGCACATGGAGGGCTCCGTGAACGGC
ATGAGATTTCCTTCAATTTTTACTGCTGTTTTATTCGCAGCATCCTCCGCATT-GCTGCTAGCTtgacta------------AAGtgcgggCAAGCGGTGTGAGCAAGGGCGAGGAGGATAACATGGCCATCATCAAGGAGTTCATGCGCTTCAAGGTGCACATGGAGGGCTCCGTGAACGGC	1	34	Insertion and Deletion	0	-1		22	MRFPSIFTAVLFAASSALLLA*											MRFPSIFTAVLFAASSALAASKKKKKASGVSKGEEDNMAIIKEFMRFKVHMEGSVNG	ATGAGATTTCCTTCAATTTTTACTGCTGTTTTATTCGCAGCATCCTCCGCATT-GCTGCTAGCTTGACTA------------AAGTGCGGGCAAGCGGTGTGAGCAAGGGCGAGGAGGATAACATGGCCATCATCAAGGAGTTCATGCGCTTCAAGGTGCACATGGAGGGCTCCGTGAACGGC	ATGAGATTTCCTTCAATTTTTACTGCTGTTTTATTCGCAGCATCCTCCGCATTAGCTGCTAGCAAAAAAAAAAAAAAAGCAAGCGGTGTGAGCAAGGGCGAGGAGGATAACATGGCCATCATCAAGGAGTTCATGCGCTTCAAGGTGCACATGGAGGGCTCCGTGAACGGC
ATGAGATTTCCTTCAATTTTTACTGCTGTTTTATTCGCAGCATCCTCCGCATTA-CTGCTAGC---------ATAAGgttatcgcaCGCAAGCGGTGTGAGCAAGGGCGAGGAGGATAACATGGCCATCATCAAGGAGTTCATGCGCTTCAAGGTGCACATGGAGGGCTCCGTGAACGGC	1	31	Insertion and Deletion	0	-1		22	MRFPSIFTAVLFAASSALLLA*											MRFPSIFTAVLFAASSALAASKKKKKASGVSKGEEDNMAIIKEFMRFKVHMEGSVNG	ATGAGATTTCCTTCAATTTTTACTGCTGTTTTATTCGCAGCATCCTCCGCATTA-CTGCTAGC---------ATAAGGTTATCGCACGCAAGCGGTGTGAGCAAGGGCGAGGAGGATAACATGGCCATCATCAAGGAGTTCATGCGCTTCAAGGTGCACATGGAGGGCTCCGTGAACGGC	ATGAGATTTCCTTCAATTTTTACTGCTGTTTTATTCGCAGCATCCTCCGCATTAGCTGCTAGCAAAAAAAAAAAAAAAGCAAGCGGTGTGAGCAAGGGCGAGGAGGATAACATGGCCATCATCAAGGAGTTCATGCGCTTCAAGGTGCACATGGAGGGCTCCGTGAACGGC
ATGAGATTTCCTTCAATTTTTACTGCTGTTTTATTCGCAGCATCCTCCGCATTAGCGGCTAGC--------TGAAATACgtcgggcgCAAGCGGTGTGAGCAAGGGCGAGGAGGATAACATGGCCATCATCAAGGAGTTCATGCGCTTCAAGGTGCACATGGAGGGCTCCGTGAACGGC	1	29	Insertion and Deletion	0	0		22	MRFPSIFTAVLFAASSALAAS*											MRFPSIFTAVLFAASSALAASKKKKKASGVSKGEEDNMAIIKEFMRFKVHMEGSVNG	ATGAGATTTCCTTCAATTTTTACTGCTGTTTTATTCGCAGCATCCTCCGCATTAGCGGCTAGC--------TGAAATACGTCGGGCGCAAGCGGTGTGAGCAAGGGCGAGGAGGATAACATGGCCATCATCAAGGAGTTCATGCGCTTCAAGGTGCACATGGAGGGCTCCGTGAACGGC	ATGAGATTTCCTTCAATTTTTACTGCTGTTTTATTCGCAGCATCCTCCGCATTAGCTGCTAGCAAAAAAAAAAAAAAAGCAAGCGGTGTGAGCAAGGGCGAGGAGGATAACATGGCCATCATCAAGGAGTTCATGCGCTTCAAGGTGCACATGGAGGGCTCCGTGAACGGC
ATGAGATTTCCTTCAATTTTTACTGCTGTTTTATTCGCAGCATCCTCCGCATTAGCT-CTAGCGTGATAATTCTACGTGCAAGCGGTGTGAGCAAGGGCGAGGAGGATAACATGGCCATCATCAAGGAGTTCATGCGCTTCAAGGTGCACATGGAGGGCTCCGTGAACGGC	1	34	Deletion	0	-1		22	MRFPSIFTAVLFAASSALALA*											MRFPSIFTAVLFAASSALAASKKKKKASGVSKGEEDNMAIIKEFMRFKVHMEGSVNG	ATGAGATTTCCTTCAATTTTTACTGCTGTTTTATTCGCAGCATCCTCCGCATTAGCT-CTAGCGTGATAATTCTACGTGCAAGCGGTGTGAGCAAGGGCGAGGAGGATAACATGGCCATCATCAAGGAGTTCATGCGCTTCAAGGTGCACATGGAGGGCTCCGTGAACGGC	ATGAGATTTCCTTCAATTTTTACTGCTGTTTTATTCGCAGCATCCTCCGCATTAGCTGCTAGCAAAAAAAAAAAAAAAGCAAGCGGTGTGAGCAAGGGCGAGGAGGATAACATGGCCATCATCAAGGAGTTCATGCGCTTCAAGGTGCACATGGAGGGCTCCGTGAACGGC
ATGAGATTTCCTTCAATTTTTACTGCTGTTTTATTCGCAGCATCCTCCGCATTAGCT-CTAGCTTAGAATATTTGTATGCAAGCGGTGTGAGCAAGGGCGAGGAGGATAACATGGCCATCATCAAGGAGTTCATGCGCTTCAAGGTGCACATGGAGGGCTCCGTGAACGGC	1	36	Deletion	0	-1		22	MRFPSIFTAVLFAASSALALA*											MRFPSIFTAVLFAASSALAASKKKKKASGVSKGEEDNMAIIKEFMRFKVHMEGSVNG	ATGAGATTTCCTTCAATTTTTACTGCTGTTTTATTCGCAGCATCCTCCGCATTAGCT-CTAGCTTAGAATATTTGTATGCAAGCGGTGTGAGCAAGGGCGAGGAGGATAACATGGCCATCATCAAGGAGTTCATGCGCTTCAAGGTGCACATGGAGGGCTCCGTGAACGGC	ATGAGATTTCCTTCAATTTTTACTGCTGTTTTATTCGCAGCATCCTCCGCATTAGCTGCTAGCAAAAAAAAAAAAAAAGCAAGCGGTGTGAGCAAGGGCGAGGAGGATAACATGGCCATCATCAAGGAGTTCATGCGCTTCAAGGTGCACATGGAGGGCTCCGTGAACGGC
ATGAGATTTCCTTCAATTTTTACTGCTGTTTTATTCGCAGCATCCTCCGCATTAGCT-CTAGCTtgatccctta----------GATGGCAAGCGGTGTGAGCAAGGGCGAGGAGGATAACATGGCCATCATCAAGGAGTTCATGCGCTTCAAGGTGCACATGGAGGGCTCCGTGAACGGC	1	35	Insertion and Deletion	0	-1		22	MRFPSIFTAVLFAASSALALA*											MRFPSIFTAVLFAASSALAASKKKKKASGVSKGEEDNMAIIKEFMRFKVHMEGSVNG	ATGAGATTTCCTTCAATTTTTACTGCTGTTTTATTCGCAGCATCCTCCGCATTAGCT-CTAGCTTGATCCCTTA----------GATGGCAAGCGGTGTGAGCAAGGGCGAGGAGGATAACATGGCCATCATCAAGGAGTTCATGCGCTTCAAGGTGCACATGGAGGGCTCCGTGAACGGC	ATGAGATTTCCTTCAATTTTTACTGCTGTTTTATTCGCAGCATCCTCCGCATTAGCTGCTAGCAAAAAAAAAAAAAAAGCAAGCGGTGTGAGCAAGGGCGAGGAGGATAACATGGCCATCATCAAGGAGTTCATGCGCTTCAAGGTGCACATGGAGGGCTCCGTGAACGGC
ATGAGATTTCCTTCAATTTTTACTGCTGTTTTATTCGCAGCATCCTCCGCATTAGCTACTAGC-------------TAGggtgcttctattgCAAGCGGTGTGAGCAAGGGCGAGGAGGATAACATGGCCATCATCAAGGAGTTCATGCGCTTCAAGGTGCACATGGAGGGCTCCGTGAACGGC	1	36	Insertion and Deletion	0	0		22	MRFPSIFTAVLFAASSALATS*											MRFPSIFTAVLFAASSALAASKKKKKASGVSKGEEDNMAIIKEFMRFKVHMEGSVNG	ATGAGATTTCCTTCAATTTTTACTGCTGTTTTATTCGCAGCATCCTCCGCATTAGCTACTAGC-------------TAGGGTGCTTCTATTGCAAGCGGTGTGAGCAAGGGCGAGGAGGATAACATGGCCATCATCAAGGAGTTCATGCGCTTCAAGGTGCACATGGAGGGCTCCGTGAACGGC	ATGAGATTTCCTTCAATTTTTACTGCTGTTTTATTCGCAGCATCCTCCGCATTAGCTGCTAGCAAAAAAAAAAAAAAAGCAAGCGGTGTGAGCAAGGGCGAGGAGGATAACATGGCCATCATCAAGGAGTTCATGCGCTTCAAGGTGCACATGGAGGGCTCCGTGAACGGC
ATGAGATTTCCTTCAATTTTTACTGCTGTTTTATTCGCAGCATCCTCCGCATTAGCTG-TAGC--------------ATgattgatggtttggCAAGCGGTGTGAGCAAGGGCGAGGAGGATAACATGGCCATCATCAAGGAGTTCATGCGCTTCAAGGTGCACATGGAGGGCTCCGTGAACGGC	1	33	Insertion and Deletion	0	-1		22	MRFPSIFTAVLFAASSALAVA*											MRFPSIFTAVLFAASSALAASKKKKKASGVSKGEEDNMAIIKEFMRFKVHMEGSVNG	ATGAGATTTCCTTCAATTTTTACTGCTGTTTTATTCGCAGCATCCTCCGCATTAGCTG-TAGC--------------ATGATTGATGGTTTGGCAAGCGGTGTGAGCAAGGGCGAGGAGGATAACATGGCCATCATCAAGGAGTTCATGCGCTTCAAGGTGCACATGGAGGGCTCCGTGAACGGC	ATGAGATTTCCTTCAATTTTTACTGCTGTTTTATTCGCAGCATCCTCCGCATTAGCTGCTAGCAAAAAAAAAAAAAAAGCAAGCGGTGTGAGCAAGGGCGAGGAGGATAACATGGCCATCATCAAGGAGTTCATGCGCTTCAAGGTGCACATGGAGGGCTCCGTGAACGGC
ATGAGATTTCCTTCAATTTTTACTGCTGTTTTATTCGCAGCATCCTCCGCATTAGCTGC-AGCCTGAAAAAATTATGCGCAAGCGGTGTGAGCAAGGGCGAGGAGGATAACATGGCCATCATCAAGGAGTTCATGCGCTTCAAGGTGCACATGGAGGGCTCCGTGAACGGC	1	31	Deletion	0	-1		22	MRFPSIFTAVLFAASSALAAA*											MRFPSIFTAVLFAASSALAASKKKKKASGVSKGEEDNMAIIKEFMRFKVHMEGSVNG	ATGAGATTTCCTTCAATTTTTACTGCTGTTTTATTCGCAGCATCCTCCGCATTAGCTGC-AGCCTGAAAAAATTATGCGCAAGCGGTGTGAGCAAGGGCGAGGAGGATAACATGGCCATCATCAAGGAGTTCATGCGCTTCAAGGTGCACATGGAGGGCTCCGTGAACGGC	ATGAGATTTCCTTCAATTTTTACTGCTGTTTTATTCGCAGCATCCTCCGCATTAGCTGCTAGCAAAAAAAAAAAAAAAGCAAGCGGTGTGAGCAAGGGCGAGGAGGATAACATGGCCATCATCAAGGAGTTCATGCGCTTCAAGGTGCACATGGAGGGCTCCGTGAACGGC
ATGAGATTTCCTTCAATTTTTACTGCTGTTTTATTCGCAGCATCCTCCGCATTAGCTGCT-GCATAAACACGTCATTGGCAAGCGGTGTGAGCAAGGGCGAGGAGGATAACATGGCCATCATCAAGGAGTTCATGCGCTTCAAGGTGCACATGGAGGGCTCCGTGAACGGC	1	36	Deletion	0	-1		22	MRFPSIFTAVLFAASSALAAA*											MRFPSIFTAVLFAASSALAASKKKKKASGVSKGEEDNMAIIKEFMRFKVHMEGSVNG	ATGAGATTTCCTTCAATTTTTACTGCTGTTTTATTCGCAGCATCCTCCGCATTAGCTGCT-GCATAAACACGTCATTGGCAAGCGGTGTGAGCAAGGGCGAGGAGGATAACATGGCCATCATCAAGGAGTTCATGCGCTTCAAGGTGCACATGGAGGGCTCCGTGAACGGC	ATGAGATTTCCTTCAATTTTTACTGCTGTTTTATTCGCAGCATCCTCCGCATTAGCTGCTAGCAAAAAAAAAAAAAAAGCAAGCGGTGTGAGCAAGGGCGAGGAGGATAACATGGCCATCATCAAGGAGTTCATGCGCTTCAAGGTGCACATGGAGGGCTCCGTGAACGGC
ATGAGATTTCCTTCAATTTTTACTGCTGTTTTATTCGCAGCATCCTCCGCATTAGCTGCT-GCATAGGGACAAATTAGGCAAGCGGTGTGAGCAAGGGCGAGGAGGATAACATGGCCATCATCAAGGAGTTCATGCGCTTCAAGGTGCACATGGAGGGCTCCGTGAACGGC	1	34	Deletion	0	-1		22	MRFPSIFTAVLFAASSALAAA*											MRFPSIFTAVLFAASSALAASKKKKKASGVSKGEEDNMAIIKEFMRFKVHMEGSVNG	ATGAGATTTCCTTCAATTTTTACTGCTGTTTTATTCGCAGCATCCTCCGCATTAGCTGCT-GCATAGGGACAAATTAGGCAAGCGGTGTGAGCAAGGGCGAGGAGGATAACATGGCCATCATCAAGGAGTTCATGCGCTTCAAGGTGCACATGGAGGGCTCCGTGAACGGC	ATGAGATTTCCTTCAATTTTTACTGCTGTTTTATTCGCAGCATCCTCCGCATTAGCTGCTAGCAAAAAAAAAAAAAAAGCAAGCGGTGTGAGCAAGGGCGAGGAGGATAACATGGCCATCATCAAGGAGTTCATGCGCTTCAAGGTGCACATGGAGGGCTCCGTGAACGGC
ATGAGATTTCCTTCAATTTTTACTGCTGTTTTATTCGCAGCATCCTCCGCATTAGCTGCT-GCATGAGGTATCGAGACGCAAGCGGTGTGAGCAAGGGCGAGGAGGATAACATGGCCATCATCAAGGAGTTCATGCGCTTCAAGGTGCACATGGAGGGCTCCGTGAACGGC	1	34	Deletion	0	-1		22	MRFPSIFTAVLFAASSALAAA*											MRFPSIFTAVLFAASSALAASKKKKKASGVSKGEEDNMAIIKEFMRFKVHMEGSVNG	ATGAGATTTCCTTCAATTTTTACTGCTGTTTTATTCGCAGCATCCTCCGCATTAGCTGCT-GCATGAGGTATCGAGACGCAAGCGGTGTGAGCAAGGGCGAGGAGGATAACATGGCCATCATCAAGGAGTTCATGCGCTTCAAGGTGCACATGGAGGGCTCCGTGAACGGC	ATGAGATTTCCTTCAATTTTTACTGCTGTTTTATTCGCAGCATCCTCCGCATTAGCTGCTAGCAAAAAAAAAAAAAAAGCAAGCGGTGTGAGCAAGGGCGAGGAGGATAACATGGCCATCATCAAGGAGTTCATGCGCTTCAAGGTGCACATGGAGGGCTCCGTGAACGGC
ATGAGATTTCCTTCAATTTTTACTGCTGTTTTATTCGCAGCATCCTCCGCATTAGCTGCT-GCGTGAATATAAGATCAGCAAGCGGTGTGAGCAAGGGCGAGGAGGATAACATGGCCATCATCAAGGAGTTCATGCGCTTCAAGGTGCACATGGAGGGCTCCGTGAACGGC	1	35	Deletion	0	-1		22	MRFPSIFTAVLFAASSALAAA*											MRFPSIFTAVLFAASSALAASKKKKKASGVSKGEEDNMAIIKEFMRFKVHMEGSVNG	ATGAGATTTCCTTCAATTTTTACTGCTGTTTTATTCGCAGCATCCTCCGCATTAGCTGCT-GCGTGAATATAAGATCAGCAAGCGGTGTGAGCAAGGGCGAGGAGGATAACATGGCCATCATCAAGGAGTTCATGCGCTTCAAGGTGCACATGGAGGGCTCCGTGAACGGC	ATGAGATTTCCTTCAATTTTTACTGCTGTTTTATTCGCAGCATCCTCCGCATTAGCTGCTAGCAAAAAAAAAAAAAAAGCAAGCGGTGTGAGCAAGGGCGAGGAGGATAACATGGCCATCATCAAGGAGTTCATGCGCTTCAAGGTGCACATGGAGGGCTCCGTGAACGGC
ATGAGATTTCCTTCAATTTTTACTGCTGTTTTATTCGCAGCATCCTCCGCATTAGCTGCTACatgatgC-------AAGCACAAGCAAGCGGTGTGAGCAAGGGCGAGGAGGATAACATGGCCATCATCAAGGAGTTCATGCGCTTCAAGGTGCACATGGAGGGCTCCGTGAACGGC	1	36	Insertion and Deletion	0	-1		22	MRFPSIFTAVLFAASSALAAT*											MRFPSIFTAVLFAASSALAASKKKKKASGVSKGEEDNMAIIKEFMRFKVHMEGSVNG	ATGAGATTTCCTTCAATTTTTACTGCTGTTTTATTCGCAGCATCCTCCGCATTAGCTGCTACATGATGC-------AAGCACAAGCAAGCGGTGTGAGCAAGGGCGAGGAGGATAACATGGCCATCATCAAGGAGTTCATGCGCTTCAAGGTGCACATGGAGGGCTCCGTGAACGGC	ATGAGATTTCCTTCAATTTTTACTGCTGTTTTATTCGCAGCATCCTCCGCATTAGCTGCTAGCAAAAAAAAAAAAAAAGCAAGCGGTGTGAGCAAGGGCGAGGAGGATAACATGGCCATCATCAAGGAGTTCATGCGCTTCAAGGTGCACATGGAGGGCTCCGTGAACGGC
ATGAGATTTCCTTCAATTTTTACTGCTGTTTTATTCGCAGCATCCTCCGCATTAGCTGCTACctgattttaaggC-------------ACGCAAGCGGTGTGAGCAAGGGCGAGGAGGATAACATGGCCATCATCAAGGAGTTCATGCGCTTCAAGGTGCACATGGAGGGCTCCGTGAACGGC	1	36	Insertion and Deletion	0	-1		22	MRFPSIFTAVLFAASSALAAT*											MRFPSIFTAVLFAASSALAASKKKKKASGVSKGEEDNMAIIKEFMRFKVHMEGSVNG	ATGAGATTTCCTTCAATTTTTACTGCTGTTTTATTCGCAGCATCCTCCGCATTAGCTGCTACCTGATTTTAAGGC-------------ACGCAAGCGGTGTGAGCAAGGGCGAGGAGGATAACATGGCCATCATCAAGGAGTTCATGCGCTTCAAGGTGCACATGGAGGGCTCCGTGAACGGC	ATGAGATTTCCTTCAATTTTTACTGCTGTTTTATTCGCAGCATCCTCCGCATTAGCTGCTAGCAAAAAAAAAAAAAAAGCAAGCGGTGTGAGCAAGGGCGAGGAGGATAACATGGCCATCATCAAGGAGTTCATGCGCTTCAAGGTGCACATGGAGGGCTCCGTGAACGGC
ATGAGATTTCCTTCAATTTTTACTGCTGTTTTATTCGCAGCATCCTCCGCATTAGCTGCTACttg--------AACTGAAATctggCAAGCGGTGTGAGCAAGGGCGAGGAGGATAACATGGCCATCATCAAGGAGTTCATGCGCTTCAAGGTGCACATGGAGGGCTCCGTGAACGGC	1	34	Insertion and Deletion	0	-1		22	MRFPSIFTAVLFAASSALAAT*											MRFPSIFTAVLFAASSALAASKKKKKASGVSKGEEDNMAIIKEFMRFKVHMEGSVNG	ATGAGATTTCCTTCAATTTTTACTGCTGTTTTATTCGCAGCATCCTCCGCATTAGCTGCTACTTG--------AACTGAAATCTGGCAAGCGGTGTGAGCAAGGGCGAGGAGGATAACATGGCCATCATCAAGGAGTTCATGCGCTTCAAGGTGCACATGGAGGGCTCCGTGAACGGC	ATGAGATTTCCTTCAATTTTTACTGCTGTTTTATTCGCAGCATCCTCCGCATTAGCTGCTAGCAAAAAAAAAAAAAAAGCAAGCGGTGTGAGCAAGGGCGAGGAGGATAACATGGCCATCATCAAGGAGTTCATGCGCTTCAAGGTGCACATGGAGGGCTCCGTGAACGGC
ATGAGATTTCCTTCAATTTTTACTGCTGTTTTATTCGCAGCATCCTCCGCATTAGCTGCTAG-----------ATAATcgggcgctgaGCAAGCGGTGTGAGCAAGGGCGAGGAGGATAACATGGCCATCATCAAGGAGTTCATGCGCTTCAAGGTGCACATGGAGGGCTCCGTGAACGGC	1	35	Insertion and Deletion	0	-1		22	MRFPSIFTAVLFAASSALAAR*											MRFPSIFTAVLFAASSALAASKKKKKASGVSKGEEDNMAIIKEFMRFKVHMEGSVNG	ATGAGATTTCCTTCAATTTTTACTGCTGTTTTATTCGCAGCATCCTCCGCATTAGCTGCTAG-----------ATAATCGGGCGCTGAGCAAGCGGTGTGAGCAAGGGCGAGGAGGATAACATGGCCATCATCAAGGAGTTCATGCGCTTCAAGGTGCACATGGAGGGCTCCGTGAACGGC	ATGAGATTTCCTTCAATTTTTACTGCTGTTTTATTCGCAGCATCCTCCGCATTAGCTGCTAGCAAAAAAAAAAAAAAAGCAAGCGGTGTGAGCAAGGGCGAGGAGGATAACATGGCCATCATCAAGGAGTTCATGCGCTTCAAGGTGCACATGGAGGGCTCCGTGAACGGC
ATGAGATTTCCTTCAATTTTTACTGCTGTTTTATTCGCAGCATCCTCCGCATTAGCTGCTAG-----------ATAGccgggcactaTGCAAGCGGTGTGAGCAAGGGCGAGGAGGATAACATGGCCATCATCAAGGAGTTCATGCGCTTCAAGGTGCACATGGAGGGCTCCGTGAACGGC	1	34	Insertion and Deletion	0	-1		22	MRFPSIFTAVLFAASSALAAR*											MRFPSIFTAVLFAASSALAASKKKKKASGVSKGEEDNMAIIKEFMRFKVHMEGSVNG	ATGAGATTTCCTTCAATTTTTACTGCTGTTTTATTCGCAGCATCCTCCGCATTAGCTGCTAG-----------ATAGCCGGGCACTATGCAAGCGGTGTGAGCAAGGGCGAGGAGGATAACATGGCCATCATCAAGGAGTTCATGCGCTTCAAGGTGCACATGGAGGGCTCCGTGAACGGC	ATGAGATTTCCTTCAATTTTTACTGCTGTTTTATTCGCAGCATCCTCCGCATTAGCTGCTAGCAAAAAAAAAAAAAAAGCAAGCGGTGTGAGCAAGGGCGAGGAGGATAACATGGCCATCATCAAGGAGTTCATGCGCTTCAAGGTGCACATGGAGGGCTCCGTGAACGGC
ATGAGATTTCCTTCAATTTTTACTGCTGTTTTATTCGCAGCATCCTCCGCATTAGCTGCTAG----------ATAAAGccgcgactaGCAAGCGGTGTGAGCAAGGGCGAGGAGGATAACATGGCCATCATCAAGGAGTTCATGCGCTTCAAGGTGCACATGGAGGGCTCCGTGAACGGC	1	36	Insertion and Deletion	0	-1		22	MRFPSIFTAVLFAASSALAAR*											MRFPSIFTAVLFAASSALAASKKKKKASGVSKGEEDNMAIIKEFMRFKVHMEGSVNG	ATGAGATTTCCTTCAATTTTTACTGCTGTTTTATTCGCAGCATCCTCCGCATTAGCTGCTAG----------ATAAAGCCGCGACTAGCAAGCGGTGTGAGCAAGGGCGAGGAGGATAACATGGCCATCATCAAGGAGTTCATGCGCTTCAAGGTGCACATGGAGGGCTCCGTGAACGGC	ATGAGATTTCCTTCAATTTTTACTGCTGTTTTATTCGCAGCATCCTCCGCATTAGCTGCTAGCAAAAAAAAAAAAAAAGCAAGCGGTGTGAGCAAGGGCGAGGAGGATAACATGGCCATCATCAAGGAGTTCATGCGCTTCAAGGTGCACATGGAGGGCTCCGTGAACGGC
ATGAGATTTCCTTCAATTTTTACTGCTGTTTTATTCGCAGCATCCTCCGCATTAGCTGCTAG--ATAGATCGAATCATGCAAGCGGTGTGAGCAAGGGCGAGGAGGATAACATGGCCATCATCAAGGAGTTCATGCGCTTCAAGGTGCACATGGAGGGCTCCGTGAACGGC	1	32	Deletion	0	-2		22	MRFPSIFTAVLFAASSALAAR*											MRFPSIFTAVLFAASSALAASKKKKKASGVSKGEEDNMAIIKEFMRFKVHMEGSVNG	ATGAGATTTCCTTCAATTTTTACTGCTGTTTTATTCGCAGCATCCTCCGCATTAGCTGCTAG--ATAGATCGAATCATGCAAGCGGTGTGAGCAAGGGCGAGGAGGATAACATGGCCATCATCAAGGAGTTCATGCGCTTCAAGGTGCACATGGAGGGCTCCGTGAACGGC	ATGAGATTTCCTTCAATTTTTACTGCTGTTTTATTCGCAGCATCCTCCGCATTAGCTGCTAGCAAAAAAAAAAAAAAAGCAAGCGGTGTGAGCAAGGGCGAGGAGGATAACATGGCCATCATCAAGGAGTTCATGCGCTTCAAGGTGCACATGGAGGGCTCCGTGAACGGC
ATGAGATTTCCTTCAATTTTTACTGCTGTTTTATTCGCAGCATCCTCCGCATTAGCTGCTAG-TTAACCAGAAAGCATGCAAGCGGTGTGAGCAAGGGCGAGGAGGATAACATGGCCATCATCAAGGAGTTCATGCGCTTCAAGGTGCACATGGAGGGCTCCGTGAACGGC	1	36	Deletion	0	-1		22	MRFPSIFTAVLFAASSALAAS*											MRFPSIFTAVLFAASSALAASKKKKKASGVSKGEEDNMAIIKEFMRFKVHMEGSVNG	ATGAGATTTCCTTCAATTTTTACTGCTGTTTTATTCGCAGCATCCTCCGCATTAGCTGCTAG-TTAACCAGAAAGCATGCAAGCGGTGTGAGCAAGGGCGAGGAGGATAACATGGCCATCATCAAGGAGTTCATGCGCTTCAAGGTGCACATGGAGGGCTCCGTGAACGGC	ATGAGATTTCCTTCAATTTTTACTGCTGTTTTATTCGCAGCATCCTCCGCATTAGCTGCTAGCAAAAAAAAAAAAAAAGCAAGCGGTGTGAGCAAGGGCGAGGAGGATAACATGGCCATCATCAAGGAGTTCATGCGCTTCAAGGTGCACATGGAGGGCTCCGTGAACGGC
ATGAGATTTCCTTCAATTTTTACTGCTGTTTTATTCGCAGCATCCTCCGCATTAGCTGCTAG-TTAACCATCAATTACGCAAGCGGTGTGAGCAAGGGCGAGGAGGATAACATGGCCATCATCAAGGAGTTCATGCGCTTCAAGGTGCACATGGAGGGCTCCGTGAACGGC	1	29	Deletion	0	-1		22	MRFPSIFTAVLFAASSALAAS*											MRFPSIFTAVLFAASSALAASKKKKKASGVSKGEEDNMAIIKEFMRFKVHMEGSVNG	ATGAGATTTCCTTCAATTTTTACTGCTGTTTTATTCGCAGCATCCTCCGCATTAGCTGCTAG-TTAACCATCAATTACGCAAGCGGTGTGAGCAAGGGCGAGGAGGATAACATGGCCATCATCAAGGAGTTCATGCGCTTCAAGGTGCACATGGAGGGCTCCGTGAACGGC	ATGAGATTTCCTTCAATTTTTACTGCTGTTTTATTCGCAGCATCCTCCGCATTAGCTGCTAGCAAAAAAAAAAAAAAAGCAAGCGGTGTGAGCAAGGGCGAGGAGGATAACATGGCCATCATCAAGGAGTTCATGCGCTTCAAGGTGCACATGGAGGGCTCCGTGAACGGC
ATGAGATTTCCTTCAATTTTTACTGCTGTTTTATTCGCAGCATCCTCCGCATTAGCTGCTAGC--------------TGActctaactatgtgccAAGCGGTGTGAGCAAGGGCGAGGAGGATAACATGGCCATCATCAAGGAGTTCATGCGCTTCAAGGTGCACATGGAGGGCTCCGTGAACGGC	1	35	Insertion and Deletion	0	1		22	MRFPSIFTAVLFAASSALAAS*											MRFPSIFTAVLFAASSALAASKKKKKASGVSKGEEDNMAIIKEFMRFKVHMEGSVNG	ATGAGATTTCCTTCAATTTTTACTGCTGTTTTATTCGCAGCATCCTCCGCATTAGCTGCTAGC--------------TGACTCTAACTATGTGCCAAGCGGTGTGAGCAAGGGCGAGGAGGATAACATGGCCATCATCAAGGAGTTCATGCGCTTCAAGGTGCACATGGAGGGCTCCGTGAACGGC	ATGAGATTTCCTTCAATTTTTACTGCTGTTTTATTCGCAGCATCCTCCGCATTAGCTGCTAGCAAAAAAAAAAAAAAAGCAAGCGGTGTGAGCAAGGGCGAGGAGGATAACATGGCCATCATCAAGGAGTTCATGCGCTTCAAGGTGCACATGGAGGGCTCCGTGAACGGC
ATGAGATTTCCTTCAATTTTTACTGCTGTTTTATTCGCAGCATCCTCCGCATTAGCTGCTAGC--------------TGActgcgtatcggtcAAGCGGTGTGAGCAAGGGCGAGGAGGATAACATGGCCATCATCAAGGAGTTCATGCGCTTCAAGGTGCACATGGAGGGCTCCGTGAACGGC	1	35	Insertion and Deletion	0	-1		22	MRFPSIFTAVLFAASSALAAS*											MRFPSIFTAVLFAASSALAASKKKKKASGVSKGEEDNMAIIKEFMRFKVHMEGSVNG	ATGAGATTTCCTTCAATTTTTACTGCTGTTTTATTCGCAGCATCCTCCGCATTAGCTGCTAGC--------------TGACTGCGTATCGGTCAAGCGGTGTGAGCAAGGGCGAGGAGGATAACATGGCCATCATCAAGGAGTTCATGCGCTTCAAGGTGCACATGGAGGGCTCCGTGAACGGC	ATGAGATTTCCTTCAATTTTTACTGCTGTTTTATTCGCAGCATCCTCCGCATTAGCTGCTAGCAAAAAAAAAAAAAAAGCAAGCGGTGTGAGCAAGGGCGAGGAGGATAACATGGCCATCATCAAGGAGTTCATGCGCTTCAAGGTGCACATGGAGGGCTCCGTGAACGGC
ATGAGATTTCCTTCAATTTTTACTGCTGTTTTATTCGCAGCATCCTCCGCATTAGCTGCTAGC-------------TAGCACcctcctctagcgaGCGGTGTGAGCAAGGGCGAGGAGGATAACATGGCCATCATCAAGGAGTTCATGCGCTTCAAGGTGCACATGGAGGGCTCCGTGAACGGC	1	35	Insertion and Deletion	0	0		22	MRFPSIFTAVLFAASSALAAS*											MRFPSIFTAVLFAASSALAASKKKKKASGVSKGEEDNMAIIKEFMRFKVHMEGSVNG	ATGAGATTTCCTTCAATTTTTACTGCTGTTTTATTCGCAGCATCCTCCGCATTAGCTGCTAGC-------------TAGCACCCTCCTCTAGCGAGCGGTGTGAGCAAGGGCGAGGAGGATAACATGGCCATCATCAAGGAGTTCATGCGCTTCAAGGTGCACATGGAGGGCTCCGTGAACGGC	ATGAGATTTCCTTCAATTTTTACTGCTGTTTTATTCGCAGCATCCTCCGCATTAGCTGCTAGCAAAAAAAAAAAAAAAGCAAGCGGTGTGAGCAAGGGCGAGGAGGATAACATGGCCATCATCAAGGAGTTCATGCGCTTCAAGGTGCACATGGAGGGCTCCGTGAACGGC
ATGAGATTTCCTTCAATTTTTACTGCTGTTTTATTCGCAGCATCCTCCGCATTAGCTGCTAGC-------------TAGcactgctacgtggCAAGCGGTGTGAGCAAGGGCGAGGAGGATAACATGGCCATCATCAAGGAGTTCATGCGCTTCAAGGTGCACATGGAGGGCTCCGTGAACGGC	1	34	Insertion and Deletion	0	0		22	MRFPSIFTAVLFAASSALAAS*											MRFPSIFTAVLFAASSALAASKKKKKASGVSKGEEDNMAIIKEFMRFKVHMEGSVNG	ATGAGATTTCCTTCAATTTTTACTGCTGTTTTATTCGCAGCATCCTCCGCATTAGCTGCTAGC-------------TAGCACTGCTACGTGGCAAGCGGTGTGAGCAAGGGCGAGGAGGATAACATGGCCATCATCAAGGAGTTCATGCGCTTCAAGGTGCACATGGAGGGCTCCGTGAACGGC	ATGAGATTTCCTTCAATTTTTACTGCTGTTTTATTCGCAGCATCCTCCGCATTAGCTGCTAGCAAAAAAAAAAAAAAAGCAAGCGGTGTGAGCAAGGGCGAGGAGGATAACATGGCCATCATCAAGGAGTTCATGCGCTTCAAGGTGCACATGGAGGGCTCCGTGAACGGC
ATGAGATTTCCTTCAATTTTTACTGCTGTTTTATTCGCAGCATCCTCCGCATTAGCTGCTAGC-------------TAGcacttagggggtgCAAGCGGTGTGAGCAAGGGCGAGGAGGATAACATGGCCATCATCAAGGAGTTCATGCGCTTCAAGGTGCACATGGAGGGCTCCGTGAACGGC	1	35	Insertion and Deletion	0	0		22	MRFPSIFTAVLFAASSALAAS*											MRFPSIFTAVLFAASSALAASKKKKKASGVSKGEEDNMAIIKEFMRFKVHMEGSVNG	ATGAGATTTCCTTCAATTTTTACTGCTGTTTTATTCGCAGCATCCTCCGCATTAGCTGCTAGC-------------TAGCACTTAGGGGGTGCAAGCGGTGTGAGCAAGGGCGAGGAGGATAACATGGCCATCATCAAGGAGTTCATGCGCTTCAAGGTGCACATGGAGGGCTCCGTGAACGGC	ATGAGATTTCCTTCAATTTTTACTGCTGTTTTATTCGCAGCATCCTCCGCATTAGCTGCTAGCAAAAAAAAAAAAAAAGCAAGCGGTGTGAGCAAGGGCGAGGAGGATAACATGGCCATCATCAAGGAGTTCATGCGCTTCAAGGTGCACATGGAGGGCTCCGTGAACGGC
ATGAGATTTCCTTCAATTTTTACTGCTGTTTTATTCGCAGCATCCTCCGCATTAGCTGCTAGC-------------TAGcacttgaggtttgCAAGCGGTGTGAGCAAGGGCGAGGAGGATAACATGGCCATCATCAAGGAGTTCATGCGCTTCAAGGTGCACATGGAGGGCTCCGTGAACGGC	1	36	Insertion and Deletion	0	0		22	MRFPSIFTAVLFAASSALAAS*											MRFPSIFTAVLFAASSALAASKKKKKASGVSKGEEDNMAIIKEFMRFKVHMEGSVNG	ATGAGATTTCCTTCAATTTTTACTGCTGTTTTATTCGCAGCATCCTCCGCATTAGCTGCTAGC-------------TAGCACTTGAGGTTTGCAAGCGGTGTGAGCAAGGGCGAGGAGGATAACATGGCCATCATCAAGGAGTTCATGCGCTTCAAGGTGCACATGGAGGGCTCCGTGAACGGC	ATGAGATTTCCTTCAATTTTTACTGCTGTTTTATTCGCAGCATCCTCCGCATTAGCTGCTAGCAAAAAAAAAAAAAAAGCAAGCGGTGTGAGCAAGGGCGAGGAGGATAACATGGCCATCATCAAGGAGTTCATGCGCTTCAAGGTGCACATGGAGGGCTCCGTGAACGGC
ATGAGATTTCCTTCAATTTTTACTGCTGTTTTATTCGCAGCATCCTCCGCATTAGCTGCTAGC-------------TAGcagtcccttatcgCAAGCGGTGTGAGCAAGGGCGAGGAGGATAACATGGCCATCATCAAGGAGTTCATGCGCTTCAAGGTGCACATGGAGGGCTCCGTGAACGGC	1	36	Insertion and Deletion	0	0		22	MRFPSIFTAVLFAASSALAAS*											MRFPSIFTAVLFAASSALAASKKKKKASGVSKGEEDNMAIIKEFMRFKVHMEGSVNG	ATGAGATTTCCTTCAATTTTTACTGCTGTTTTATTCGCAGCATCCTCCGCATTAGCTGCTAGC-------------TAGCAGTCCCTTATCGCAAGCGGTGTGAGCAAGGGCGAGGAGGATAACATGGCCATCATCAAGGAGTTCATGCGCTTCAAGGTGCACATGGAGGGCTCCGTGAACGGC	ATGAGATTTCCTTCAATTTTTACTGCTGTTTTATTCGCAGCATCCTCCGCATTAGCTGCTAGCAAAAAAAAAAAAAAAGCAAGCGGTGTGAGCAAGGGCGAGGAGGATAACATGGCCATCATCAAGGAGTTCATGCGCTTCAAGGTGCACATGGAGGGCTCCGTGAACGGC
ATGAGATTTCCTTCAATTTTTACTGCTGTTTTATTCGCAGCATCCTCCGCATTAGCTGCTAGC-------------TAGcagtctgatctcgCAAGCGGTGTGAGCAAGGGCGAGGAGGATAACATGGCCATCATCAAGGAGTTCATGCGCTTCAAGGTGCACATGGAGGGCTCCGTGAACGGC	1	36	Insertion and Deletion	0	0		22	MRFPSIFTAVLFAASSALAAS*											MRFPSIFTAVLFAASSALAASKKKKKASGVSKGEEDNMAIIKEFMRFKVHMEGSVNG	ATGAGATTTCCTTCAATTTTTACTGCTGTTTTATTCGCAGCATCCTCCGCATTAGCTGCTAGC-------------TAGCAGTCTGATCTCGCAAGCGGTGTGAGCAAGGGCGAGGAGGATAACATGGCCATCATCAAGGAGTTCATGCGCTTCAAGGTGCACATGGAGGGCTCCGTGAACGGC	ATGAGATTTCCTTCAATTTTTACTGCTGTTTTATTCGCAGCATCCTCCGCATTAGCTGCTAGCAAAAAAAAAAAAAAAGCAAGCGGTGTGAGCAAGGGCGAGGAGGATAACATGGCCATCATCAAGGAGTTCATGCGCTTCAAGGTGCACATGGAGGGCTCCGTGAACGGC
ATGAGATTTCCTTCAATTTTTACTGCTGTTTTATTCGCAGCATCCTCCGCATTAGCTGCTAGC-------------TAGcatggactttcggCAAGCGGTGTGAGCAAGGGCGAGGAGGATAACATGGCCATCATCAAGGAGTTCATGCGCTTCAAGGTGCACATGGAGGGCTCCGTGAACGGC	1	30	Insertion and Deletion	0	0		22	MRFPSIFTAVLFAASSALAAS*											MRFPSIFTAVLFAASSALAASKKKKKASGVSKGEEDNMAIIKEFMRFKVHMEGSVNG	ATGAGATTTCCTTCAATTTTTACTGCTGTTTTATTCGCAGCATCCTCCGCATTAGCTGCTAGC-------------TAGCATGGACTTTCGGCAAGCGGTGTGAGCAAGGGCGAGGAGGATAACATGGCCATCATCAAGGAGTTCATGCGCTTCAAGGTGCACATGGAGGGCTCCGTGAACGGC	ATGAGATTTCCTTCAATTTTTACTGCTGTTTTATTCGCAGCATCCTCCGCATTAGCTGCTAGCAAAAAAAAAAAAAAAGCAAGCGGTGTGAGCAAGGGCGAGGAGGATAACATGGCCATCATCAAGGAGTTCATGCGCTTCAAGGTGCACATGGAGGGCTCCGTGAACGGC
ATGAGATTTCCTTCAATTTTTACTGCTGTTTTATTCGCAGCATCCTCCGCATTAGCTGCTAGC-------------TAGccatttgcttcggCAAGCGGTGTGAGCAAGGGCGAGGAGGATAACATGGCCATCATCAAGGAGTTCATGCGCTTCAAGGTGCACATGGAGGGCTCCGTGAACGGC	1	36	Insertion and Deletion	0	0		22	MRFPSIFTAVLFAASSALAAS*											MRFPSIFTAVLFAASSALAASKKKKKASGVSKGEEDNMAIIKEFMRFKVHMEGSVNG	ATGAGATTTCCTTCAATTTTTACTGCTGTTTTATTCGCAGCATCCTCCGCATTAGCTGCTAGC-------------TAGCCATTTGCTTCGGCAAGCGGTGTGAGCAAGGGCGAGGAGGATAACATGGCCATCATCAAGGAGTTCATGCGCTTCAAGGTGCACATGGAGGGCTCCGTGAACGGC	ATGAGATTTCCTTCAATTTTTACTGCTGTTTTATTCGCAGCATCCTCCGCATTAGCTGCTAGCAAAAAAAAAAAAAAAGCAAGCGGTGTGAGCAAGGGCGAGGAGGATAACATGGCCATCATCAAGGAGTTCATGCGCTTCAAGGTGCACATGGAGGGCTCCGTGAACGGC
ATGAGATTTCCTTCAATTTTTACTGCTGTTTTATTCGCAGCATCCTCCGCATTAGCTGCTAGC-------------TAGcccgtagttggcgCAAGCGGTGTGAGCAAGGGCGAGGAGGATAACATGGCCATCATCAAGGAGTTCATGCGCTTCAAGGTGCACATGGAGGGCTCCGTGAACGGC	1	36	Insertion and Deletion	0	0		22	MRFPSIFTAVLFAASSALAAS*											MRFPSIFTAVLFAASSALAASKKKKKASGVSKGEEDNMAIIKEFMRFKVHMEGSVNG	ATGAGATTTCCTTCAATTTTTACTGCTGTTTTATTCGCAGCATCCTCCGCATTAGCTGCTAGC-------------TAGCCCGTAGTTGGCGCAAGCGGTGTGAGCAAGGGCGAGGAGGATAACATGGCCATCATCAAGGAGTTCATGCGCTTCAAGGTGCACATGGAGGGCTCCGTGAACGGC	ATGAGATTTCCTTCAATTTTTACTGCTGTTTTATTCGCAGCATCCTCCGCATTAGCTGCTAGCAAAAAAAAAAAAAAAGCAAGCGGTGTGAGCAAGGGCGAGGAGGATAACATGGCCATCATCAAGGAGTTCATGCGCTTCAAGGTGCACATGGAGGGCTCCGTGAACGGC
ATGAGATTTCCTTCAATTTTTACTGCTGTTTTATTCGCAGCATCCTCCGCATTAGCTGCTAGC-------------TAGccgacttaccccgCAAGCGGTGTGAGCAAGGGCGAGGAGGATAACATGGCCATCATCAAGGAGTTCATGCGCTTCAAGGTGCACATGGAGGGCTCCGTGAACGGC	1	26	Insertion and Deletion	0	0		22	MRFPSIFTAVLFAASSALAAS*											MRFPSIFTAVLFAASSALAASKKKKKASGVSKGEEDNMAIIKEFMRFKVHMEGSVNG	ATGAGATTTCCTTCAATTTTTACTGCTGTTTTATTCGCAGCATCCTCCGCATTAGCTGCTAGC-------------TAGCCGACTTACCCCGCAAGCGGTGTGAGCAAGGGCGAGGAGGATAACATGGCCATCATCAAGGAGTTCATGCGCTTCAAGGTGCACATGGAGGGCTCCGTGAACGGC	ATGAGATTTCCTTCAATTTTTACTGCTGTTTTATTCGCAGCATCCTCCGCATTAGCTGCTAGCAAAAAAAAAAAAAAAGCAAGCGGTGTGAGCAAGGGCGAGGAGGATAACATGGCCATCATCAAGGAGTTCATGCGCTTCAAGGTGCACATGGAGGGCTCCGTGAACGGC
ATGAGATTTCCTTCAATTTTTACTGCTGTTTTATTCGCAGCATCCTCCGCATTAGCTGCTAGC-------------TAGcctatcatacggcgCAAGCGGTGTGAGCAAGGGCGAGGAGGATAACATGGCCATCATCAAGGAGTTCATGCGCTTCAAGGTGCACATGGAGGGCTCCGTGAACGGC	1	27	Insertion and Deletion	0	1		22	MRFPSIFTAVLFAASSALAAS*											MRFPSIFTAVLFAASSALAASKKKKKASGVSKGEEDNMAIIKEFMRFKVHMEGSVNG	ATGAGATTTCCTTCAATTTTTACTGCTGTTTTATTCGCAGCATCCTCCGCATTAGCTGCTAGC-------------TAGCCTATCATACGGCGCAAGCGGTGTGAGCAAGGGCGAGGAGGATAACATGGCCATCATCAAGGAGTTCATGCGCTTCAAGGTGCACATGGAGGGCTCCGTGAACGGC	ATGAGATTTCCTTCAATTTTTACTGCTGTTTTATTCGCAGCATCCTCCGCATTAGCTGCTAGCAAAAAAAAAAAAAAAGCAAGCGGTGTGAGCAAGGGCGAGGAGGATAACATGGCCATCATCAAGGAGTTCATGCGCTTCAAGGTGCACATGGAGGGCTCCGTGAACGGC
ATGAGATTTCCTTCAATTTTTACTGCTGTTTTATTCGCAGCATCCTCCGCATTAGCTGCTAGC-------------TAGcgcaccctctcggCAAGCGGTGTGAGCAAGGGCGAGGAGGATAACATGGCCATCATCAAGGAGTTCATGCGCTTCAAGGTGCACATGGAGGGCTCCGTGAACGGC	1	35	Insertion and Deletion	0	0		22	MRFPSIFTAVLFAASSALAAS*											MRFPSIFTAVLFAASSALAASKKKKKASGVSKGEEDNMAIIKEFMRFKVHMEGSVNG	ATGAGATTTCCTTCAATTTTTACTGCTGTTTTATTCGCAGCATCCTCCGCATTAGCTGCTAGC-------------TAGCGCACCCTCTCGGCAAGCGGTGTGAGCAAGGGCGAGGAGGATAACATGGCCATCATCAAGGAGTTCATGCGCTTCAAGGTGCACATGGAGGGCTCCGTGAACGGC	ATGAGATTTCCTTCAATTTTTACTGCTGTTTTATTCGCAGCATCCTCCGCATTAGCTGCTAGCAAAAAAAAAAAAAAAGCAAGCGGTGTGAGCAAGGGCGAGGAGGATAACATGGCCATCATCAAGGAGTTCATGCGCTTCAAGGTGCACATGGAGGGCTCCGTGAACGGC
ATGAGATTTCCTTCAATTTTTACTGCTGTTTTATTCGCAGCATCCTCCGCATTAGCTGCTAGC-------------TAGcgggagtcgtgtgCAAGCGGTGTGAGCAAGGGCGAGGAGGATAACATGGCCATCATCAAGGAGTTCATGCGCTTCAAGGTGCACATGGAGGGCTCCGTGAACGGC	1	35	Insertion and Deletion	0	0		22	MRFPSIFTAVLFAASSALAAS*											MRFPSIFTAVLFAASSALAASKKKKKASGVSKGEEDNMAIIKEFMRFKVHMEGSVNG	ATGAGATTTCCTTCAATTTTTACTGCTGTTTTATTCGCAGCATCCTCCGCATTAGCTGCTAGC-------------TAGCGGGAGTCGTGTGCAAGCGGTGTGAGCAAGGGCGAGGAGGATAACATGGCCATCATCAAGGAGTTCATGCGCTTCAAGGTGCACATGGAGGGCTCCGTGAACGGC	ATGAGATTTCCTTCAATTTTTACTGCTGTTTTATTCGCAGCATCCTCCGCATTAGCTGCTAGCAAAAAAAAAAAAAAAGCAAGCGGTGTGAGCAAGGGCGAGGAGGATAACATGGCCATCATCAAGGAGTTCATGCGCTTCAAGGTGCACATGGAGGGCTCCGTGAACGGC
ATGAGATTTCCTTCAATTTTTACTGCTGTTTTATTCGCAGCATCCTCCGCATTAGCTGCTAGC-------------TAGcggtggtttattgCAAGCGGTGTGAGCAAGGGCGAGGAGGATAACATGGCCATCATCAAGGAGTTCATGCGCTTCAAGGTGCACATGGAGGGCTCCGTGAACGGC	1	34	Insertion and Deletion	0	0		22	MRFPSIFTAVLFAASSALAAS*											MRFPSIFTAVLFAASSALAASKKKKKASGVSKGEEDNMAIIKEFMRFKVHMEGSVNG	ATGAGATTTCCTTCAATTTTTACTGCTGTTTTATTCGCAGCATCCTCCGCATTAGCTGCTAGC-------------TAGCGGTGGTTTATTGCAAGCGGTGTGAGCAAGGGCGAGGAGGATAACATGGCCATCATCAAGGAGTTCATGCGCTTCAAGGTGCACATGGAGGGCTCCGTGAACGGC	ATGAGATTTCCTTCAATTTTTACTGCTGTTTTATTCGCAGCATCCTCCGCATTAGCTGCTAGCAAAAAAAAAAAAAAAGCAAGCGGTGTGAGCAAGGGCGAGGAGGATAACATGGCCATCATCAAGGAGTTCATGCGCTTCAAGGTGCACATGGAGGGCTCCGTGAACGGC
ATGAGATTTCCTTCAATTTTTACTGCTGTTTTATTCGCAGCATCCTCCGCATTAGCTGCTAGC-------------TAGcggtgtatctgggCAAGCGGTGTGAGCAAGGGCGAGGAGGATAACATGGCCATCATCAAGGAGTTCATGCTGTTCAAGGTGCACATGGAGGGCTCCGTGAACGGC	1	24	Insertion and Deletion	0	0		22	MRFPSIFTAVLFAASSALAAS*											MRFPSIFTAVLFAASSALAASKKKKKASGVSKGEEDNMAIIKEFMRFKVHMEGSVNG	ATGAGATTTCCTTCAATTTTTACTGCTGTTTTATTCGCAGCATCCTCCGCATTAGCTGCTAGC-------------TAGCGGTGTATCTGGGCAAGCGGTGTGAGCAAGGGCGAGGAGGATAACATGGCCATCATCAAGGAGTTCATGCTGTTCAAGGTGCACATGGAGGGCTCCGTGAACGGC	ATGAGATTTCCTTCAATTTTTACTGCTGTTTTATTCGCAGCATCCTCCGCATTAGCTGCTAGCAAAAAAAAAAAAAAAGCAAGCGGTGTGAGCAAGGGCGAGGAGGATAACATGGCCATCATCAAGGAGTTCATGCGCTTCAAGGTGCACATGGAGGGCTCCGTGAACGGC
ATGAGATTTCCTTCAATTTTTACTGCTGTTTTATTCGCAGCATCCTCCGCATTAGCTGCTAGC-------------TAGcgtatgcggtgtgCAAGCGGTGTGAGCAAGGGCGAGGAGGATAACATGGCCATCATCAAGGAGTTCATGCGCTTCAAGGTGCACATGGAGGGCTCCGTGAACGGC	1	35	Insertion and Deletion	0	0		22	MRFPSIFTAVLFAASSALAAS*											MRFPSIFTAVLFAASSALAASKKKKKASGVSKGEEDNMAIIKEFMRFKVHMEGSVNG	ATGAGATTTCCTTCAATTTTTACTGCTGTTTTATTCGCAGCATCCTCCGCATTAGCTGCTAGC-------------TAGCGTATGCGGTGTGCAAGCGGTGTGAGCAAGGGCGAGGAGGATAACATGGCCATCATCAAGGAGTTCATGCGCTTCAAGGTGCACATGGAGGGCTCCGTGAACGGC	ATGAGATTTCCTTCAATTTTTACTGCTGTTTTATTCGCAGCATCCTCCGCATTAGCTGCTAGCAAAAAAAAAAAAAAAGCAAGCGGTGTGAGCAAGGGCGAGGAGGATAACATGGCCATCATCAAGGAGTTCATGCGCTTCAAGGTGCACATGGAGGGCTCCGTGAACGGC
ATGAGATTTCCTTCAATTTTTACTGCTGTTTTATTCGCAGCATCCTCCGCATTAGCTGCTAGC-------------TAGcgtcccgcgttggCAAGCGGTGTGAGCAAGGGCGAGGAGGATAACATGGCCATCATCAAGGAGTTCATGCGCTTCAAGGTGCACATGGAGGGCTCCGTGAACGGC	1	36	Insertion and Deletion	0	0		22	MRFPSIFTAVLFAASSALAAS*											MRFPSIFTAVLFAASSALAASKKKKKASGVSKGEEDNMAIIKEFMRFKVHMEGSVNG	ATGAGATTTCCTTCAATTTTTACTGCTGTTTTATTCGCAGCATCCTCCGCATTAGCTGCTAGC-------------TAGCGTCCCGCGTTGGCAAGCGGTGTGAGCAAGGGCGAGGAGGATAACATGGCCATCATCAAGGAGTTCATGCGCTTCAAGGTGCACATGGAGGGCTCCGTGAACGGC	ATGAGATTTCCTTCAATTTTTACTGCTGTTTTATTCGCAGCATCCTCCGCATTAGCTGCTAGCAAAAAAAAAAAAAAAGCAAGCGGTGTGAGCAAGGGCGAGGAGGATAACATGGCCATCATCAAGGAGTTCATGCGCTTCAAGGTGCACATGGAGGGCTCCGTGAACGGC
ATGAGATTTCCTTCAATTTTTACTGCTGTTTTATTCGCAGCATCCTCCGCATTAGCTGCTAGC-------------TAGcgtgctccaggtgCAAGCGGTGTGAGCAAGGGCGAGGAGGATAACATGGCCATCATCAAGGAGTTCATGCGCTTCAAGGTGCACATGGAGGGCTCCGTGAACGGC	1	36	Insertion and Deletion	0	0		22	MRFPSIFTAVLFAASSALAAS*											MRFPSIFTAVLFAASSALAASKKKKKASGVSKGEEDNMAIIKEFMRFKVHMEGSVNG	ATGAGATTTCCTTCAATTTTTACTGCTGTTTTATTCGCAGCATCCTCCGCATTAGCTGCTAGC-------------TAGCGTGCTCCAGGTGCAAGCGGTGTGAGCAAGGGCGAGGAGGATAACATGGCCATCATCAAGGAGTTCATGCGCTTCAAGGTGCACATGGAGGGCTCCGTGAACGGC	ATGAGATTTCCTTCAATTTTTACTGCTGTTTTATTCGCAGCATCCTCCGCATTAGCTGCTAGCAAAAAAAAAAAAAAAGCAAGCGGTGTGAGCAAGGGCGAGGAGGATAACATGGCCATCATCAAGGAGTTCATGCGCTTCAAGGTGCACATGGAGGGCTCCGTGAACGGC
ATGAGATTTCCTTCAATTTTTACTGCTGTTTTATTCGCAGCATCCTCCGCATTAGCTGCTAGC-------------TAGctccgttcacttgCAAGCGGTGTGAGCAAGGGCGAGGAGGATAACATGGCCATCATCAAGGAGTTCATGCGCTTCAAGGTGCACATGGAGGGCTCCGTGAACGGC	1	26	Insertion and Deletion	0	0		22	MRFPSIFTAVLFAASSALAAS*											MRFPSIFTAVLFAASSALAASKKKKKASGVSKGEEDNMAIIKEFMRFKVHMEGSVNG	ATGAGATTTCCTTCAATTTTTACTGCTGTTTTATTCGCAGCATCCTCCGCATTAGCTGCTAGC-------------TAGCTCCGTTCACTTGCAAGCGGTGTGAGCAAGGGCGAGGAGGATAACATGGCCATCATCAAGGAGTTCATGCGCTTCAAGGTGCACATGGAGGGCTCCGTGAACGGC	ATGAGATTTCCTTCAATTTTTACTGCTGTTTTATTCGCAGCATCCTCCGCATTAGCTGCTAGCAAAAAAAAAAAAAAAGCAAGCGGTGTGAGCAAGGGCGAGGAGGATAACATGGCCATCATCAAGGAGTTCATGCGCTTCAAGGTGCACATGGAGGGCTCCGTGAACGGC
ATGAGATTTCCTTCAATTTTTACTGCTGTTTTATTCGCAGCATCCTCCGCATTAGCTGCTAGC-------------TAGctggctcttcccgCAAGCGGTGTGAGCAAGGGCGAGGAGGATAACATGGCCATCATCAAGGAGTTCATGCGCTTCAAGGTGCACATGGAGGGCTCCGTGAACGGC	1	36	Insertion and Deletion	0	0		22	MRFPSIFTAVLFAASSALAAS*											MRFPSIFTAVLFAASSALAASKKKKKASGVSKGEEDNMAIIKEFMRFKVHMEGSVNG	ATGAGATTTCCTTCAATTTTTACTGCTGTTTTATTCGCAGCATCCTCCGCATTAGCTGCTAGC-------------TAGCTGGCTCTTCCCGCAAGCGGTGTGAGCAAGGGCGAGGAGGATAACATGGCCATCATCAAGGAGTTCATGCGCTTCAAGGTGCACATGGAGGGCTCCGTGAACGGC	ATGAGATTTCCTTCAATTTTTACTGCTGTTTTATTCGCAGCATCCTCCGCATTAGCTGCTAGCAAAAAAAAAAAAAAAGCAAGCGGTGTGAGCAAGGGCGAGGAGGATAACATGGCCATCATCAAGGAGTTCATGCGCTTCAAGGTGCACATGGAGGGCTCCGTGAACGGC
ATGAGATTTCCTTCAATTTTTACTGCTGTTTTATTCGCAGCATCCTCCGCATTAGCTGCTAGC-------------TAGctttccactggtgCAAGCGGTGTGAGCAAGGGCGAGGAGGATAACATGGCCATCATCAAGGAGTTTAGGCGCTTCAAGGTGCACATGGAGGGCACCGTGAACGGC	1	23	Insertion and Deletion	0	0		22	MRFPSIFTAVLFAASSALAAS*											MRFPSIFTAVLFAASSALAASKKKKKASGVSKGEEDNMAIIKEFMRFKVHMEGSVNG	ATGAGATTTCCTTCAATTTTTACTGCTGTTTTATTCGCAGCATCCTCCGCATTAGCTGCTAGC-------------TAGCTTTCCACTGGTGCAAGCGGTGTGAGCAAGGGCGAGGAGGATAACATGGCCATCATCAAGGAGTTTAGGCGCTTCAAGGTGCACATGGAGGGCACCGTGAACGGC	ATGAGATTTCCTTCAATTTTTACTGCTGTTTTATTCGCAGCATCCTCCGCATTAGCTGCTAGCAAAAAAAAAAAAAAAGCAAGCGGTGTGAGCAAGGGCGAGGAGGATAACATGGCCATCATCAAGGAGTTCATGCGCTTCAAGGTGCACATGGAGGGCTCCGTGAACGGC
ATGAGATTTCCTTCAATTTTTACTGCTGTTTTATTCGCAGCATCCTCCGCATTAGCTGCTAGC-------------TAGgaccggacccgcgCAAGCGGTGTGAGCAAGGGCGAGGAGGATAACATGGCCATCATCAAGGAGTTCATGCGCTTCAAGGTGCACATGGAGGGCTCCGTGAACGGC	1	32	Insertion and Deletion	0	0		22	MRFPSIFTAVLFAASSALAAS*											MRFPSIFTAVLFAASSALAASKKKKKASGVSKGEEDNMAIIKEFMRFKVHMEGSVNG	ATGAGATTTCCTTCAATTTTTACTGCTGTTTTATTCGCAGCATCCTCCGCATTAGCTGCTAGC-------------TAGGACCGGACCCGCGCAAGCGGTGTGAGCAAGGGCGAGGAGGATAACATGGCCATCATCAAGGAGTTCATGCGCTTCAAGGTGCACATGGAGGGCTCCGTGAACGGC	ATGAGATTTCCTTCAATTTTTACTGCTGTTTTATTCGCAGCATCCTCCGCATTAGCTGCTAGCAAAAAAAAAAAAAAAGCAAGCGGTGTGAGCAAGGGCGAGGAGGATAACATGGCCATCATCAAGGAGTTCATGCGCTTCAAGGTGCACATGGAGGGCTCCGTGAACGGC
ATGAGATTTCCTTCAATTTTTACTGCTGTTTTATTCGCAGCATCCTCCGCATTAGCTGCTAGC-------------TAGgacggccctcgtgCAAGCGGTGTGAGCAAGGGCGAGGAGGATAACATGGCCATCATCAAGGAGTTCATGCGCTTCAAGGTGCACATGGAGGGCTCCGTGAACGGC	1	33	Insertion and Deletion	0	0		22	MRFPSIFTAVLFAASSALAAS*											MRFPSIFTAVLFAASSALAASKKKKKASGVSKGEEDNMAIIKEFMRFKVHMEGSVNG	ATGAGATTTCCTTCAATTTTTACTGCTGTTTTATTCGCAGCATCCTCCGCATTAGCTGCTAGC-------------TAGGACGGCCCTCGTGCAAGCGGTGTGAGCAAGGGCGAGGAGGATAACATGGCCATCATCAAGGAGTTCATGCGCTTCAAGGTGCACATGGAGGGCTCCGTGAACGGC	ATGAGATTTCCTTCAATTTTTACTGCTGTTTTATTCGCAGCATCCTCCGCATTAGCTGCTAGCAAAAAAAAAAAAAAAGCAAGCGGTGTGAGCAAGGGCGAGGAGGATAACATGGCCATCATCAAGGAGTTCATGCGCTTCAAGGTGCACATGGAGGGCTCCGTGAACGGC
ATGAGATTTCCTTCAATTTTTACTGCTGTTTTATTCGCAGCATCCTCCGCATTAGCTGCTAGC-------------TAGgaggtggattgtgCAAGCGGTGTGAGCAAGGGCGAGGAGGATAACATGGCCATCATCAAGGAGTTCATGCGCTTCAAGGTGCACATGGAGGGCTCCGTGAACGGC	1	36	Insertion and Deletion	0	0		22	MRFPSIFTAVLFAASSALAAS*											MRFPSIFTAVLFAASSALAASKKKKKASGVSKGEEDNMAIIKEFMRFKVHMEGSVNG	ATGAGATTTCCTTCAATTTTTACTGCTGTTTTATTCGCAGCATCCTCCGCATTAGCTGCTAGC-------------TAGGAGGTGGATTGTGCAAGCGGTGTGAGCAAGGGCGAGGAGGATAACATGGCCATCATCAAGGAGTTCATGCGCTTCAAGGTGCACATGGAGGGCTCCGTGAACGGC	ATGAGATTTCCTTCAATTTTTACTGCTGTTTTATTCGCAGCATCCTCCGCATTAGCTGCTAGCAAAAAAAAAAAAAAAGCAAGCGGTGTGAGCAAGGGCGAGGAGGATAACATGGCCATCATCAAGGAGTTCATGCGCTTCAAGGTGCACATGGAGGGCTCCGTGAACGGC
ATGAGATTTCCTTCAATTTTTACTGCTGTTTTATTCGCAGCATCCTCCGCATTAGCTGCTAGC-------------TAGgatcggacctccgCAAGCGGTGTGAGCAAGGGCGAGGAGGATAACATGGCCATCATCAAGGAGTTCATGCGCTTCAAGGTGCACATGTAGGGCTCCGTGAACGGC	1	22	Insertion and Deletion	0	0		22	MRFPSIFTAVLFAASSALAAS*											MRFPSIFTAVLFAASSALAASKKKKKASGVSKGEEDNMAIIKEFMRFKVHMEGSVNG	ATGAGATTTCCTTCAATTTTTACTGCTGTTTTATTCGCAGCATCCTCCGCATTAGCTGCTAGC-------------TAGGATCGGACCTCCGCAAGCGGTGTGAGCAAGGGCGAGGAGGATAACATGGCCATCATCAAGGAGTTCATGCGCTTCAAGGTGCACATGTAGGGCTCCGTGAACGGC	ATGAGATTTCCTTCAATTTTTACTGCTGTTTTATTCGCAGCATCCTCCGCATTAGCTGCTAGCAAAAAAAAAAAAAAAGCAAGCGGTGTGAGCAAGGGCGAGGAGGATAACATGGCCATCATCAAGGAGTTCATGCGCTTCAAGGTGCACATGGAGGGCTCCGTGAACGGC
ATGAGATTTCCTTCAATTTTTACTGCTGTTTTATTCGCAGCATCCTCCGCATTAGCTGCTAGC-------------TAGgatggtggaccggCAAGCGGTGTGAGCAAGGGCGAGGAGGATAACATGGCCATCATCAAGGAGTTCATGCGCTTCAAGGTGCACATGGAGGGCTCCGTGAACGGC	1	36	Insertion and Deletion	0	0		22	MRFPSIFTAVLFAASSALAAS*											MRFPSIFTAVLFAASSALAASKKKKKASGVSKGEEDNMAIIKEFMRFKVHMEGSVNG	ATGAGATTTCCTTCAATTTTTACTGCTGTTTTATTCGCAGCATCCTCCGCATTAGCTGCTAGC-------------TAGGATGGTGGACCGGCAAGCGGTGTGAGCAAGGGCGAGGAGGATAACATGGCCATCATCAAGGAGTTCATGCGCTTCAAGGTGCACATGGAGGGCTCCGTGAACGGC	ATGAGATTTCCTTCAATTTTTACTGCTGTTTTATTCGCAGCATCCTCCGCATTAGCTGCTAGCAAAAAAAAAAAAAAAGCAAGCGGTGTGAGCAAGGGCGAGGAGGATAACATGGCCATCATCAAGGAGTTCATGCGCTTCAAGGTGCACATGGAGGGCTCCGTGAACGGC
ATGAGATTTCCTTCAATTTTTACTGCTGTTTTATTCGCAGCATCCTCCGCATTAGCTGCTAGC-------------TAGgatggtgtttttgCAAGCGGTGTGAGCAAGGGCGAGGAGGATAACATGGCCATCATCAAGGAGTTCATGCGCTTCAAGGTGCACATGGAGGGCTCCGTGAACGGC	1	34	Insertion and Deletion	0	0		22	MRFPSIFTAVLFAASSALAAS*											MRFPSIFTAVLFAASSALAASKKKKKASGVSKGEEDNMAIIKEFMRFKVHMEGSVNG	ATGAGATTTCCTTCAATTTTTACTGCTGTTTTATTCGCAGCATCCTCCGCATTAGCTGCTAGC-------------TAGGATGGTGTTTTTGCAAGCGGTGTGAGCAAGGGCGAGGAGGATAACATGGCCATCATCAAGGAGTTCATGCGCTTCAAGGTGCACATGGAGGGCTCCGTGAACGGC	ATGAGATTTCCTTCAATTTTTACTGCTGTTTTATTCGCAGCATCCTCCGCATTAGCTGCTAGCAAAAAAAAAAAAAAAGCAAGCGGTGTGAGCAAGGGCGAGGAGGATAACATGGCCATCATCAAGGAGTTCATGCGCTTCAAGGTGCACATGGAGGGCTCCGTGAACGGC
ATGAGATTTCCTTCAATTTTTACTGCTGTTTTATTCGCAGCATCCTCCGCATTAGCTGCTAGC-------------TAGgattctcagtgggCAAGCGGTGTGAGCAAGGGCGAGGAGGATAACATGGCCATCATCAAGGAGTTCATGCGCTTCAAGGTGCACATGGAGGGCTCCGTGAACGGC	1	35	Insertion and Deletion	0	0		22	MRFPSIFTAVLFAASSALAAS*											MRFPSIFTAVLFAASSALAASKKKKKASGVSKGEEDNMAIIKEFMRFKVHMEGSVNG	ATGAGATTTCCTTCAATTTTTACTGCTGTTTTATTCGCAGCATCCTCCGCATTAGCTGCTAGC-------------TAGGATTCTCAGTGGGCAAGCGGTGTGAGCAAGGGCGAGGAGGATAACATGGCCATCATCAAGGAGTTCATGCGCTTCAAGGTGCACATGGAGGGCTCCGTGAACGGC	ATGAGATTTCCTTCAATTTTTACTGCTGTTTTATTCGCAGCATCCTCCGCATTAGCTGCTAGCAAAAAAAAAAAAAAAGCAAGCGGTGTGAGCAAGGGCGAGGAGGATAACATGGCCATCATCAAGGAGTTCATGCGCTTCAAGGTGCACATGGAGGGCTCCGTGAACGGC
ATGAGATTTCCTTCAATTTTTACTGCTGTTTTATTCGCAGCATCCTCCGCATTAGCTGCTAGC-------------TAGgcctaccaccgggCAAGCGGTGTGAGCAAGGGCGAGGAGGATAACATGGCCATCATCAAGGAGTTCATGCGCTTCAAGGTGCACATGGAGGGCTCCGTGAACGGC	1	25	Insertion and Deletion	0	0		22	MRFPSIFTAVLFAASSALAAS*											MRFPSIFTAVLFAASSALAASKKKKKASGVSKGEEDNMAIIKEFMRFKVHMEGSVNG	ATGAGATTTCCTTCAATTTTTACTGCTGTTTTATTCGCAGCATCCTCCGCATTAGCTGCTAGC-------------TAGGCCTACCACCGGGCAAGCGGTGTGAGCAAGGGCGAGGAGGATAACATGGCCATCATCAAGGAGTTCATGCGCTTCAAGGTGCACATGGAGGGCTCCGTGAACGGC	ATGAGATTTCCTTCAATTTTTACTGCTGTTTTATTCGCAGCATCCTCCGCATTAGCTGCTAGCAAAAAAAAAAAAAAAGCAAGCGGTGTGAGCAAGGGCGAGGAGGATAACATGGCCATCATCAAGGAGTTCATGCGCTTCAAGGTGCACATGGAGGGCTCCGTGAACGGC
ATGAGATTTCCTTCAATTTTTACTGCTGTTTTATTCGCAGCATCCTCCGCATTAGCTGCTAGC-------------TAGgcctctaccctcgCAAGCGGTGTGAGCAAGGGCGAGGAGGATAACATGGCCATCATCAAGGAGTTCATGCGCTTCAAGGTGCACATGGAGGGCTCCGTGAACGGC	1	36	Insertion and Deletion	0	0		22	MRFPSIFTAVLFAASSALAAS*											MRFPSIFTAVLFAASSALAASKKKKKASGVSKGEEDNMAIIKEFMRFKVHMEGSVNG	ATGAGATTTCCTTCAATTTTTACTGCTGTTTTATTCGCAGCATCCTCCGCATTAGCTGCTAGC-------------TAGGCCTCTACCCTCGCAAGCGGTGTGAGCAAGGGCGAGGAGGATAACATGGCCATCATCAAGGAGTTCATGCGCTTCAAGGTGCACATGGAGGGCTCCGTGAACGGC	ATGAGATTTCCTTCAATTTTTACTGCTGTTTTATTCGCAGCATCCTCCGCATTAGCTGCTAGCAAAAAAAAAAAAAAAGCAAGCGGTGTGAGCAAGGGCGAGGAGGATAACATGGCCATCATCAAGGAGTTCATGCGCTTCAAGGTGCACATGGAGGGCTCCGTGAACGGC
ATGAGATTTCCTTCAATTTTTACTGCTGTTTTATTCGCAGCATCCTCCGCATTAGCTGCTAGC-------------TAGgcgccgagcccggCAAGCGGTGTGAGCAAGGGCGAGGAGGATAACATGGCCATCATCAAGGAGTTCATGCGCTTCAAGGTGCACATGGAGGGCTCCGTGAACGGC	1	35	Insertion and Deletion	0	0		22	MRFPSIFTAVLFAASSALAAS*											MRFPSIFTAVLFAASSALAASKKKKKASGVSKGEEDNMAIIKEFMRFKVHMEGSVNG	ATGAGATTTCCTTCAATTTTTACTGCTGTTTTATTCGCAGCATCCTCCGCATTAGCTGCTAGC-------------TAGGCGCCGAGCCCGGCAAGCGGTGTGAGCAAGGGCGAGGAGGATAACATGGCCATCATCAAGGAGTTCATGCGCTTCAAGGTGCACATGGAGGGCTCCGTGAACGGC	ATGAGATTTCCTTCAATTTTTACTGCTGTTTTATTCGCAGCATCCTCCGCATTAGCTGCTAGCAAAAAAAAAAAAAAAGCAAGCGGTGTGAGCAAGGGCGAGGAGGATAACATGGCCATCATCAAGGAGTTCATGCGCTTCAAGGTGCACATGGAGGGCTCCGTGAACGGC
ATGAGATTTCCTTCAATTTTTACTGCTGTTTTATTCGCAGCATCCTCCGCATTAGCTGCTAGC-------------TAGgcgcgccccctcgCAAGCGGTGTGAGCAAGGGCGAGGAGGATAACATGGCCATCATCAAGGAGTTCATGCGCTTCAAGGTGCACATGGAGGGCTCCGTGAACGGC	1	32	Insertion and Deletion	0	0		22	MRFPSIFTAVLFAASSALAAS*											MRFPSIFTAVLFAASSALAASKKKKKASGVSKGEEDNMAIIKEFMRFKVHMEGSVNG	ATGAGATTTCCTTCAATTTTTACTGCTGTTTTATTCGCAGCATCCTCCGCATTAGCTGCTAGC-------------TAGGCGCGCCCCCTCGCAAGCGGTGTGAGCAAGGGCGAGGAGGATAACATGGCCATCATCAAGGAGTTCATGCGCTTCAAGGTGCACATGGAGGGCTCCGTGAACGGC	ATGAGATTTCCTTCAATTTTTACTGCTGTTTTATTCGCAGCATCCTCCGCATTAGCTGCTAGCAAAAAAAAAAAAAAAGCAAGCGGTGTGAGCAAGGGCGAGGAGGATAACATGGCCATCATCAAGGAGTTCATGCGCTTCAAGGTGCACATGGAGGGCTCCGTGAACGGC
ATGAGATTTCCTTCAATTTTTACTGCTGTTTTATTCGCAGCATCCTCCGCATTAGCTGCTAGC-------------TAGgctgtttgagttgCAAGCGGTGTGAGCAAGGGCGAGGAGGATAACATGGCCATCATCAAGGAGTTCATGCGCTTCAAGGTGCACATGGAGGGCTCCGTGAACGGC	1	35	Insertion and Deletion	0	0		22	MRFPSIFTAVLFAASSALAAS*											MRFPSIFTAVLFAASSALAASKKKKKASGVSKGEEDNMAIIKEFMRFKVHMEGSVNG	ATGAGATTTCCTTCAATTTTTACTGCTGTTTTATTCGCAGCATCCTCCGCATTAGCTGCTAGC-------------TAGGCTGTTTGAGTTGCAAGCGGTGTGAGCAAGGGCGAGGAGGATAACATGGCCATCATCAAGGAGTTCATGCGCTTCAAGGTGCACATGGAGGGCTCCGTGAACGGC	ATGAGATTTCCTTCAATTTTTACTGCTGTTTTATTCGCAGCATCCTCCGCATTAGCTGCTAGCAAAAAAAAAAAAAAAGCAAGCGGTGTGAGCAAGGGCGAGGAGGATAACATGGCCATCATCAAGGAGTTCATGCGCTTCAAGGTGCACATGGAGGGCTCCGTGAACGGC
ATGAGATTTCCTTCAATTTTTACTGCTGTTTTATTCGCAGCATCCTCCGCATTAGCTGCTAGC-------------TAGGgaccggtctcagccAAGCGGTGTGAGCAAGGGCGAGGAGGATAACATGGCCATCATCAAGGAGTTCATGCGCTTCAAGGTGCACATGGAGGGCTCCGTGAACGGC	1	35	Insertion and Deletion	0	1		22	MRFPSIFTAVLFAASSALAAS*											MRFPSIFTAVLFAASSALAASKKKKKASGVSKGEEDNMAIIKEFMRFKVHMEGSVNG	ATGAGATTTCCTTCAATTTTTACTGCTGTTTTATTCGCAGCATCCTCCGCATTAGCTGCTAGC-------------TAGGGACCGGTCTCAGCCAAGCGGTGTGAGCAAGGGCGAGGAGGATAACATGGCCATCATCAAGGAGTTCATGCGCTTCAAGGTGCACATGGAGGGCTCCGTGAACGGC	ATGAGATTTCCTTCAATTTTTACTGCTGTTTTATTCGCAGCATCCTCCGCATTAGCTGCTAGCAAAAAAAAAAAAAAAGCAAGCGGTGTGAGCAAGGGCGAGGAGGATAACATGGCCATCATCAAGGAGTTCATGCGCTTCAAGGTGCACATGGAGGGCTCCGTGAACGGC
ATGAGATTTCCTTCAATTTTTACTGCTGTTTTATTCGCAGCATCCTCCGCATTAGCTGCTAGC-------------TAGggacggtctgtggCAAGCGGTGTGAGCAAGGGCGAGGAGGATAACATGGCCATCATCAAGGAGTTCATGCGCTTCAAGGTGCACATGGAGGGCTCCGTGAACGGC	1	31	Insertion and Deletion	0	0		22	MRFPSIFTAVLFAASSALAAS*											MRFPSIFTAVLFAASSALAASKKKKKASGVSKGEEDNMAIIKEFMRFKVHMEGSVNG	ATGAGATTTCCTTCAATTTTTACTGCTGTTTTATTCGCAGCATCCTCCGCATTAGCTGCTAGC-------------TAGGGACGGTCTGTGGCAAGCGGTGTGAGCAAGGGCGAGGAGGATAACATGGCCATCATCAAGGAGTTCATGCGCTTCAAGGTGCACATGGAGGGCTCCGTGAACGGC	ATGAGATTTCCTTCAATTTTTACTGCTGTTTTATTCGCAGCATCCTCCGCATTAGCTGCTAGCAAAAAAAAAAAAAAAGCAAGCGGTGTGAGCAAGGGCGAGGAGGATAACATGGCCATCATCAAGGAGTTCATGCGCTTCAAGGTGCACATGGAGGGCTCCGTGAACGGC
ATGAGATTTCCTTCAATTTTTACTGCTGTTTTATTCGCAGCATCCTCCGCATTAGCTGCTAGC-------------TAGggagtccctcgttgCAAGCGGTGTGAGCAAGGGCGAGGAGGATAACATGGCCATCATCAAGGAGTTCATGCGCTTCAAGGTGCACATGGAGGGCTCCGTGAACGGC	1	35	Insertion and Deletion	0	1		22	MRFPSIFTAVLFAASSALAAS*											MRFPSIFTAVLFAASSALAASKKKKKASGVSKGEEDNMAIIKEFMRFKVHMEGSVNG	ATGAGATTTCCTTCAATTTTTACTGCTGTTTTATTCGCAGCATCCTCCGCATTAGCTGCTAGC-------------TAGGGAGTCCCTCGTTGCAAGCGGTGTGAGCAAGGGCGAGGAGGATAACATGGCCATCATCAAGGAGTTCATGCGCTTCAAGGTGCACATGGAGGGCTCCGTGAACGGC	ATGAGATTTCCTTCAATTTTTACTGCTGTTTTATTCGCAGCATCCTCCGCATTAGCTGCTAGCAAAAAAAAAAAAAAAGCAAGCGGTGTGAGCAAGGGCGAGGAGGATAACATGGCCATCATCAAGGAGTTCATGCGCTTCAAGGTGCACATGGAGGGCTCCGTGAACGGC
ATGAGATTTCCTTCAATTTTTACTGCTGTTTTATTCGCAGCATCCTCCGCATTAGCTGCTAGC-------------TAGggagttggggtggCAAGCGGTGTGAGCAAGGGCGAGGAGGATAACATGGCCATCATCAAGGAGTTCATGCGCTTCAAGGTGCACATGGAGGGCTCCGTGAACGGC	1	36	Insertion and Deletion	0	0		22	MRFPSIFTAVLFAASSALAAS*											MRFPSIFTAVLFAASSALAASKKKKKASGVSKGEEDNMAIIKEFMRFKVHMEGSVNG	ATGAGATTTCCTTCAATTTTTACTGCTGTTTTATTCGCAGCATCCTCCGCATTAGCTGCTAGC-------------TAGGGAGTTGGGGTGGCAAGCGGTGTGAGCAAGGGCGAGGAGGATAACATGGCCATCATCAAGGAGTTCATGCGCTTCAAGGTGCACATGGAGGGCTCCGTGAACGGC	ATGAGATTTCCTTCAATTTTTACTGCTGTTTTATTCGCAGCATCCTCCGCATTAGCTGCTAGCAAAAAAAAAAAAAAAGCAAGCGGTGTGAGCAAGGGCGAGGAGGATAACATGGCCATCATCAAGGAGTTCATGCGCTTCAAGGTGCACATGGAGGGCTCCGTGAACGGC
ATGAGATTTCCTTCAATTTTTACTGCTGTTTTATTCGCAGCATCCTCCGCATTAGCTGCTAGC-------------TAGggggatgtacgggCAAGCGGTGTGAGCAAGGGCGAGGAGGATAACATGGCCATCATCAAGGAGTTCATGCGCTTCAAGGTGCACATGGAGGGCTCCGTGAACGGC	1	26	Insertion and Deletion	0	0		22	MRFPSIFTAVLFAASSALAAS*											MRFPSIFTAVLFAASSALAASKKKKKASGVSKGEEDNMAIIKEFMRFKVHMEGSVNG	ATGAGATTTCCTTCAATTTTTACTGCTGTTTTATTCGCAGCATCCTCCGCATTAGCTGCTAGC-------------TAGGGGGATGTACGGGCAAGCGGTGTGAGCAAGGGCGAGGAGGATAACATGGCCATCATCAAGGAGTTCATGCGCTTCAAGGTGCACATGGAGGGCTCCGTGAACGGC	ATGAGATTTCCTTCAATTTTTACTGCTGTTTTATTCGCAGCATCCTCCGCATTAGCTGCTAGCAAAAAAAAAAAAAAAGCAAGCGGTGTGAGCAAGGGCGAGGAGGATAACATGGCCATCATCAAGGAGTTCATGCGCTTCAAGGTGCACATGGAGGGCTCCGTGAACGGC
ATGAGATTTCCTTCAATTTTTACTGCTGTTTTATTCGCAGCATCCTCCGCATTAGCTGCTAGC-------------TAGgggggtgaggttgCAAGCGGTGTGAGCAAGGGCGAGGAGGATAACATGGCCATCATCAAGGAGTTCATGCGCTTCAAGGTGCACATGGAGGGCTCCGTGAACGGC	1	35	Insertion and Deletion	0	0		22	MRFPSIFTAVLFAASSALAAS*											MRFPSIFTAVLFAASSALAASKKKKKASGVSKGEEDNMAIIKEFMRFKVHMEGSVNG	ATGAGATTTCCTTCAATTTTTACTGCTGTTTTATTCGCAGCATCCTCCGCATTAGCTGCTAGC-------------TAGGGGGGTGAGGTTGCAAGCGGTGTGAGCAAGGGCGAGGAGGATAACATGGCCATCATCAAGGAGTTCATGCGCTTCAAGGTGCACATGGAGGGCTCCGTGAACGGC	ATGAGATTTCCTTCAATTTTTACTGCTGTTTTATTCGCAGCATCCTCCGCATTAGCTGCTAGCAAAAAAAAAAAAAAAGCAAGCGGTGTGAGCAAGGGCGAGGAGGATAACATGGCCATCATCAAGGAGTTCATGCGCTTCAAGGTGCACATGGAGGGCTCCGTGAACGGC
ATGAGATTTCCTTCAATTTTTACTGCTGTTTTATTCGCAGCATCCTCCGCATTAGCTGCTAGC-------------TAGggggtacaccccgCAAGCGGTGTGAGCAAGGGCGAGGAGGATAACATGGCCATCATCAAGGAGTTCATGCGCTTCAAGGTGCACATGGAGGGCTCCGTGAACGGC	1	32	Insertion and Deletion	0	0		22	MRFPSIFTAVLFAASSALAAS*											MRFPSIFTAVLFAASSALAASKKKKKASGVSKGEEDNMAIIKEFMRFKVHMEGSVNG	ATGAGATTTCCTTCAATTTTTACTGCTGTTTTATTCGCAGCATCCTCCGCATTAGCTGCTAGC-------------TAGGGGGTACACCCCGCAAGCGGTGTGAGCAAGGGCGAGGAGGATAACATGGCCATCATCAAGGAGTTCATGCGCTTCAAGGTGCACATGGAGGGCTCCGTGAACGGC	ATGAGATTTCCTTCAATTTTTACTGCTGTTTTATTCGCAGCATCCTCCGCATTAGCTGCTAGCAAAAAAAAAAAAAAAGCAAGCGGTGTGAGCAAGGGCGAGGAGGATAACATGGCCATCATCAAGGAGTTCATGCGCTTCAAGGTGCACATGGAGGGCTCCGTGAACGGC
ATGAGATTTCCTTCAATTTTTACTGCTGTTTTATTCGCAGCATCCTCCGCATTAGCTGCTAGC-------------TAGggtgttcgttgggCAAGCGGTGTGAGCAAGGGCGAGGAGGATAACATGGCCATCATCAAGGAGTTCATGCGCTTCAAGGTGCACATGGAGGGCTCCGTGAACGGC	1	35	Insertion and Deletion	0	0		22	MRFPSIFTAVLFAASSALAAS*											MRFPSIFTAVLFAASSALAASKKKKKASGVSKGEEDNMAIIKEFMRFKVHMEGSVNG	ATGAGATTTCCTTCAATTTTTACTGCTGTTTTATTCGCAGCATCCTCCGCATTAGCTGCTAGC-------------TAGGGTGTTCGTTGGGCAAGCGGTGTGAGCAAGGGCGAGGAGGATAACATGGCCATCATCAAGGAGTTCATGCGCTTCAAGGTGCACATGGAGGGCTCCGTGAACGGC	ATGAGATTTCCTTCAATTTTTACTGCTGTTTTATTCGCAGCATCCTCCGCATTAGCTGCTAGCAAAAAAAAAAAAAAAGCAAGCGGTGTGAGCAAGGGCGAGGAGGATAACATGGCCATCATCAAGGAGTTCATGCGCTTCAAGGTGCACATGGAGGGCTCCGTGAACGGC
ATGAGATTTCCTTCAATTTTTACTGCTGTTTTATTCGCAGCATCCTCCGCATTAGCTGCTAGC-------------TAGggtttgtgctgggCAAGCGGTGTGAGCAAGGGCGAGGAGGATAACATGGCCATCATCAAGGAGTTCATGCGCTTCAAGGTGCACATGGAGGGCTCCGTGAACGGC	1	33	Insertion and Deletion	0	0		22	MRFPSIFTAVLFAASSALAAS*											MRFPSIFTAVLFAASSALAASKKKKKASGVSKGEEDNMAIIKEFMRFKVHMEGSVNG	ATGAGATTTCCTTCAATTTTTACTGCTGTTTTATTCGCAGCATCCTCCGCATTAGCTGCTAGC-------------TAGGGTTTGTGCTGGGCAAGCGGTGTGAGCAAGGGCGAGGAGGATAACATGGCCATCATCAAGGAGTTCATGCGCTTCAAGGTGCACATGGAGGGCTCCGTGAACGGC	ATGAGATTTCCTTCAATTTTTACTGCTGTTTTATTCGCAGCATCCTCCGCATTAGCTGCTAGCAAAAAAAAAAAAAAAGCAAGCGGTGTGAGCAAGGGCGAGGAGGATAACATGGCCATCATCAAGGAGTTCATGCGCTTCAAGGTGCACATGGAGGGCTCCGTGAACGGC
ATGAGATTTCCTTCAATTTTTACTGCTGTTTTATTCGCAGCATCCTCCGCATTAGCTGCTAGC-------------TAGgtactgattcgggCAAGCGGTGTGAGCAAGGGCGAGGAGGATAACATGGCCATCATCAAGGAGTTCATGCGCTTCAAGGTGCACATGGAGGGCTCCGTGAACGGC	1	35	Insertion and Deletion	0	0		22	MRFPSIFTAVLFAASSALAAS*											MRFPSIFTAVLFAASSALAASKKKKKASGVSKGEEDNMAIIKEFMRFKVHMEGSVNG	ATGAGATTTCCTTCAATTTTTACTGCTGTTTTATTCGCAGCATCCTCCGCATTAGCTGCTAGC-------------TAGGTACTGATTCGGGCAAGCGGTGTGAGCAAGGGCGAGGAGGATAACATGGCCATCATCAAGGAGTTCATGCGCTTCAAGGTGCACATGGAGGGCTCCGTGAACGGC	ATGAGATTTCCTTCAATTTTTACTGCTGTTTTATTCGCAGCATCCTCCGCATTAGCTGCTAGCAAAAAAAAAAAAAAAGCAAGCGGTGTGAGCAAGGGCGAGGAGGATAACATGGCCATCATCAAGGAGTTCATGCGCTTCAAGGTGCACATGGAGGGCTCCGTGAACGGC
ATGAGATTTCCTTCAATTTTTACTGCTGTTTTATTCGCAGCATCCTCCGCATTAGCTGCTAGC-------------TAGgtagtctgtgctgCAAGCGGTGTGAGCAAGGGCGAGGAGGATAACATGGCCATCATCAAGGAGTTCATGCGCTTCAAGGTGCACATGGAGGGCTCCGTGAACGGC	1	36	Insertion and Deletion	0	0		22	MRFPSIFTAVLFAASSALAAS*											MRFPSIFTAVLFAASSALAASKKKKKASGVSKGEEDNMAIIKEFMRFKVHMEGSVNG	ATGAGATTTCCTTCAATTTTTACTGCTGTTTTATTCGCAGCATCCTCCGCATTAGCTGCTAGC-------------TAGGTAGTCTGTGCTGCAAGCGGTGTGAGCAAGGGCGAGGAGGATAACATGGCCATCATCAAGGAGTTCATGCGCTTCAAGGTGCACATGGAGGGCTCCGTGAACGGC	ATGAGATTTCCTTCAATTTTTACTGCTGTTTTATTCGCAGCATCCTCCGCATTAGCTGCTAGCAAAAAAAAAAAAAAAGCAAGCGGTGTGAGCAAGGGCGAGGAGGATAACATGGCCATCATCAAGGAGTTCATGCGCTTCAAGGTGCACATGGAGGGCTCCGTGAACGGC
ATGAGATTTCCTTCAATTTTTACTGCTGTTTTATTCGCAGCATCCTCCGCATTAGCTGCTAGC-------------TAGgtatgctttatggCAAGCGGTGTGAGCAAGGGCGAGGAGGATAACATGGCCATCATCAAGGAGTTCATGCGCTTCAAGGTGCACATGGAGGGCTCCGTGAACGGC	1	36	Insertion and Deletion	0	0		22	MRFPSIFTAVLFAASSALAAS*											MRFPSIFTAVLFAASSALAASKKKKKASGVSKGEEDNMAIIKEFMRFKVHMEGSVNG	ATGAGATTTCCTTCAATTTTTACTGCTGTTTTATTCGCAGCATCCTCCGCATTAGCTGCTAGC-------------TAGGTATGCTTTATGGCAAGCGGTGTGAGCAAGGGCGAGGAGGATAACATGGCCATCATCAAGGAGTTCATGCGCTTCAAGGTGCACATGGAGGGCTCCGTGAACGGC	ATGAGATTTCCTTCAATTTTTACTGCTGTTTTATTCGCAGCATCCTCCGCATTAGCTGCTAGCAAAAAAAAAAAAAAAGCAAGCGGTGTGAGCAAGGGCGAGGAGGATAACATGGCCATCATCAAGGAGTTCATGCGCTTCAAGGTGCACATGGAGGGCTCCGTGAACGGC
ATGAGATTTCCTTCAATTTTTACTGCTGTTTTATTCGCAGCATCCTCCGCATTAGCTGCTAGC-------------TAGgtccgtttgttggCAAGCGGTGTGAGCAAGGGCGAGGAGGATAACATGGCCATCATCAAGGAGTTCATGCGCTTCAAGGTGCACATGGAGGGCTCCGTGAACGGC	1	35	Insertion and Deletion	0	0		22	MRFPSIFTAVLFAASSALAAS*											MRFPSIFTAVLFAASSALAASKKKKKASGVSKGEEDNMAIIKEFMRFKVHMEGSVNG	ATGAGATTTCCTTCAATTTTTACTGCTGTTTTATTCGCAGCATCCTCCGCATTAGCTGCTAGC-------------TAGGTCCGTTTGTTGGCAAGCGGTGTGAGCAAGGGCGAGGAGGATAACATGGCCATCATCAAGGAGTTCATGCGCTTCAAGGTGCACATGGAGGGCTCCGTGAACGGC	ATGAGATTTCCTTCAATTTTTACTGCTGTTTTATTCGCAGCATCCTCCGCATTAGCTGCTAGCAAAAAAAAAAAAAAAGCAAGCGGTGTGAGCAAGGGCGAGGAGGATAACATGGCCATCATCAAGGAGTTCATGCGCTTCAAGGTGCACATGGAGGGCTCCGTGAACGGC
ATGAGATTTCCTTCAATTTTTACTGCTGTTTTATTCGCAGCATCCTCCGCATTAGCTGCTAGC-------------TAGgtcggtattggggCAAGCGGTGTGAGCAAGGGCGAGGAGGATAACATGGCCATCATCAAGGAGTTCATGCGCTTCAAGGTGCACATGGAGGGCTCCGTGAACGGC	1	36	Insertion and Deletion	0	0		22	MRFPSIFTAVLFAASSALAAS*											MRFPSIFTAVLFAASSALAASKKKKKASGVSKGEEDNMAIIKEFMRFKVHMEGSVNG	ATGAGATTTCCTTCAATTTTTACTGCTGTTTTATTCGCAGCATCCTCCGCATTAGCTGCTAGC-------------TAGGTCGGTATTGGGGCAAGCGGTGTGAGCAAGGGCGAGGAGGATAACATGGCCATCATCAAGGAGTTCATGCGCTTCAAGGTGCACATGGAGGGCTCCGTGAACGGC	ATGAGATTTCCTTCAATTTTTACTGCTGTTTTATTCGCAGCATCCTCCGCATTAGCTGCTAGCAAAAAAAAAAAAAAAGCAAGCGGTGTGAGCAAGGGCGAGGAGGATAACATGGCCATCATCAAGGAGTTCATGCGCTTCAAGGTGCACATGGAGGGCTCCGTGAACGGC
ATGAGATTTCCTTCAATTTTTACTGCTGTTTTATTCGCAGCATCCTCCGCATTAGCTGCTAGC-------------TAGgtcgtttggtcggCAAGCGGTGTGAGCAAGGGCGAGGAGGATAACATGGCCATCATCAAGGAGTTCATGCGCTTCAAGGTGCACATGGAGGGCTCCGTGAACGGC	1	34	Insertion and Deletion	0	0		22	MRFPSIFTAVLFAASSALAAS*											MRFPSIFTAVLFAASSALAASKKKKKASGVSKGEEDNMAIIKEFMRFKVHMEGSVNG	ATGAGATTTCCTTCAATTTTTACTGCTGTTTTATTCGCAGCATCCTCCGCATTAGCTGCTAGC-------------TAGGTCGTTTGGTCGGCAAGCGGTGTGAGCAAGGGCGAGGAGGATAACATGGCCATCATCAAGGAGTTCATGCGCTTCAAGGTGCACATGGAGGGCTCCGTGAACGGC	ATGAGATTTCCTTCAATTTTTACTGCTGTTTTATTCGCAGCATCCTCCGCATTAGCTGCTAGCAAAAAAAAAAAAAAAGCAAGCGGTGTGAGCAAGGGCGAGGAGGATAACATGGCCATCATCAAGGAGTTCATGCGCTTCAAGGTGCACATGGAGGGCTCCGTGAACGGC
ATGAGATTTCCTTCAATTTTTACTGCTGTTTTATTCGCAGCATCCTCCGCATTAGCTGCTAGC-------------TAGgtctccacctgcgCAAGCGGTGTGAGCAAGGGCGAGGAGGATAACATGGCCATCATCAAGGAGTTCATGCGCTTCAAGGTGCACATGGAGGGCTCCGTGAACGGC	1	36	Insertion and Deletion	0	0		22	MRFPSIFTAVLFAASSALAAS*											MRFPSIFTAVLFAASSALAASKKKKKASGVSKGEEDNMAIIKEFMRFKVHMEGSVNG	ATGAGATTTCCTTCAATTTTTACTGCTGTTTTATTCGCAGCATCCTCCGCATTAGCTGCTAGC-------------TAGGTCTCCACCTGCGCAAGCGGTGTGAGCAAGGGCGAGGAGGATAACATGGCCATCATCAAGGAGTTCATGCGCTTCAAGGTGCACATGGAGGGCTCCGTGAACGGC	ATGAGATTTCCTTCAATTTTTACTGCTGTTTTATTCGCAGCATCCTCCGCATTAGCTGCTAGCAAAAAAAAAAAAAAAGCAAGCGGTGTGAGCAAGGGCGAGGAGGATAACATGGCCATCATCAAGGAGTTCATGCGCTTCAAGGTGCACATGGAGGGCTCCGTGAACGGC
ATGAGATTTCCTTCAATTTTTACTGCTGTTTTATTCGCAGCATCCTCCGCATTAGCTGCTAGC-------------TAGgtcttttggagtgCAAGCGGTGTGAGCAAGGGCGAGGAGGATAACATGGCCATCATCAAGGAGTTCATGCGCTTCAAGGTGCACATGGAGGGCTCCGTGAACGGC	1	33	Insertion and Deletion	0	0		22	MRFPSIFTAVLFAASSALAAS*											MRFPSIFTAVLFAASSALAASKKKKKASGVSKGEEDNMAIIKEFMRFKVHMEGSVNG	ATGAGATTTCCTTCAATTTTTACTGCTGTTTTATTCGCAGCATCCTCCGCATTAGCTGCTAGC-------------TAGGTCTTTTGGAGTGCAAGCGGTGTGAGCAAGGGCGAGGAGGATAACATGGCCATCATCAAGGAGTTCATGCGCTTCAAGGTGCACATGGAGGGCTCCGTGAACGGC	ATGAGATTTCCTTCAATTTTTACTGCTGTTTTATTCGCAGCATCCTCCGCATTAGCTGCTAGCAAAAAAAAAAAAAAAGCAAGCGGTGTGAGCAAGGGCGAGGAGGATAACATGGCCATCATCAAGGAGTTCATGCGCTTCAAGGTGCACATGGAGGGCTCCGTGAACGGC
ATGAGATTTCCTTCAATTTTTACTGCTGTTTTATTCGCAGCATCCTCCGCATTAGCTGCTAGC-------------TAGgtgagttccccggCAAGCGGTGTGAGCAAGGGCGAGGAGGATAACATGGCCATCATCAAGGAGTTCATGCGCTTCAAGGTGCACATGGAGGGCTCCGTGAACGGC	1	34	Insertion and Deletion	0	0		22	MRFPSIFTAVLFAASSALAAS*											MRFPSIFTAVLFAASSALAASKKKKKASGVSKGEEDNMAIIKEFMRFKVHMEGSVNG	ATGAGATTTCCTTCAATTTTTACTGCTGTTTTATTCGCAGCATCCTCCGCATTAGCTGCTAGC-------------TAGGTGAGTTCCCCGGCAAGCGGTGTGAGCAAGGGCGAGGAGGATAACATGGCCATCATCAAGGAGTTCATGCGCTTCAAGGTGCACATGGAGGGCTCCGTGAACGGC	ATGAGATTTCCTTCAATTTTTACTGCTGTTTTATTCGCAGCATCCTCCGCATTAGCTGCTAGCAAAAAAAAAAAAAAAGCAAGCGGTGTGAGCAAGGGCGAGGAGGATAACATGGCCATCATCAAGGAGTTCATGCGCTTCAAGGTGCACATGGAGGGCTCCGTGAACGGC
ATGAGATTTCCTTCAATTTTTACTGCTGTTTTATTCGCAGCATCCTCCGCATTAGCTGCTAGC-------------TAGgtgattcgtacggCAAGCGGTGTGAGCAAGGGCGAGGAGGATAACATGGCCATCATCAAGGAGTTCATGCGCTTCAAGGTGCACATGGAGGGCTCCGTGAACGGC	1	33	Insertion and Deletion	0	0		22	MRFPSIFTAVLFAASSALAAS*											MRFPSIFTAVLFAASSALAASKKKKKASGVSKGEEDNMAIIKEFMRFKVHMEGSVNG	ATGAGATTTCCTTCAATTTTTACTGCTGTTTTATTCGCAGCATCCTCCGCATTAGCTGCTAGC-------------TAGGTGATTCGTACGGCAAGCGGTGTGAGCAAGGGCGAGGAGGATAACATGGCCATCATCAAGGAGTTCATGCGCTTCAAGGTGCACATGGAGGGCTCCGTGAACGGC	ATGAGATTTCCTTCAATTTTTACTGCTGTTTTATTCGCAGCATCCTCCGCATTAGCTGCTAGCAAAAAAAAAAAAAAAGCAAGCGGTGTGAGCAAGGGCGAGGAGGATAACATGGCCATCATCAAGGAGTTCATGCGCTTCAAGGTGCACATGGAGGGCTCCGTGAACGGC
ATGAGATTTCCTTCAATTTTTACTGCTGTTTTATTCGCAGCATCCTCCGCATTAGCTGCTAGC-------------TAGgtggatacccttgCAAGCGGTGTGAGCAAGGGCGAGGAGGATAACATGGCCATCATCAAGGAGTTCATGCGCTTCAAGGTGCACATGGAGGGCTCCGTGAACGGC	1	35	Insertion and Deletion	0	0		22	MRFPSIFTAVLFAASSALAAS*											MRFPSIFTAVLFAASSALAASKKKKKASGVSKGEEDNMAIIKEFMRFKVHMEGSVNG	ATGAGATTTCCTTCAATTTTTACTGCTGTTTTATTCGCAGCATCCTCCGCATTAGCTGCTAGC-------------TAGGTGGATACCCTTGCAAGCGGTGTGAGCAAGGGCGAGGAGGATAACATGGCCATCATCAAGGAGTTCATGCGCTTCAAGGTGCACATGGAGGGCTCCGTGAACGGC	ATGAGATTTCCTTCAATTTTTACTGCTGTTTTATTCGCAGCATCCTCCGCATTAGCTGCTAGCAAAAAAAAAAAAAAAGCAAGCGGTGTGAGCAAGGGCGAGGAGGATAACATGGCCATCATCAAGGAGTTCATGCGCTTCAAGGTGCACATGGAGGGCTCCGTGAACGGC
ATGAGATTTCCTTCAATTTTTACTGCTGTTTTATTCGCAGCATCCTCCGCATTAGCTGCTAGC-------------TAGgtggtagagtcggCAAGCGGTGTGAGCAAGGGCGAGGAGGATAACATGGCCATCATCAAGGAGTTCATGCGCTTCAAGGTGCACATGGAGGGCTCCGTGAACGGC	1	26	Insertion and Deletion	0	0		22	MRFPSIFTAVLFAASSALAAS*											MRFPSIFTAVLFAASSALAASKKKKKASGVSKGEEDNMAIIKEFMRFKVHMEGSVNG	ATGAGATTTCCTTCAATTTTTACTGCTGTTTTATTCGCAGCATCCTCCGCATTAGCTGCTAGC-------------TAGGTGGTAGAGTCGGCAAGCGGTGTGAGCAAGGGCGAGGAGGATAACATGGCCATCATCAAGGAGTTCATGCGCTTCAAGGTGCACATGGAGGGCTCCGTGAACGGC	ATGAGATTTCCTTCAATTTTTACTGCTGTTTTATTCGCAGCATCCTCCGCATTAGCTGCTAGCAAAAAAAAAAAAAAAGCAAGCGGTGTGAGCAAGGGCGAGGAGGATAACATGGCCATCATCAAGGAGTTCATGCGCTTCAAGGTGCACATGGAGGGCTCCGTGAACGGC
ATGAGATTTCCTTCAATTTTTACTGCTGTTTTATTCGCAGCATCCTCCGCATTAGCTGCTAGC-------------TAGgtggttagtttggCAAGCGGTGTGAGCAAGGGCGAGGAGGATAACATGGCCATCATCAAGGAGTTCATGCGCTTCAAGGTGCACATGGAGGGCTCCGTGAACGGC	1	36	Insertion and Deletion	0	0		22	MRFPSIFTAVLFAASSALAAS*											MRFPSIFTAVLFAASSALAASKKKKKASGVSKGEEDNMAIIKEFMRFKVHMEGSVNG	ATGAGATTTCCTTCAATTTTTACTGCTGTTTTATTCGCAGCATCCTCCGCATTAGCTGCTAGC-------------TAGGTGGTTAGTTTGGCAAGCGGTGTGAGCAAGGGCGAGGAGGATAACATGGCCATCATCAAGGAGTTCATGCGCTTCAAGGTGCACATGGAGGGCTCCGTGAACGGC	ATGAGATTTCCTTCAATTTTTACTGCTGTTTTATTCGCAGCATCCTCCGCATTAGCTGCTAGCAAAAAAAAAAAAAAAGCAAGCGGTGTGAGCAAGGGCGAGGAGGATAACATGGCCATCATCAAGGAGTTCATGCGCTTCAAGGTGCACATGGAGGGCTCCGTGAACGGC
ATGAGATTTCCTTCAATTTTTACTGCTGTTTTATTCGCAGCATCCTCCGCATTAGCTGCTAGC-------------TAGgtgttactttgtgCAAGCGGTGTGAGCAAGGGCGAGGAGGATAACATGGCCATCATCAAGGAGTTCATGCGCTTCAAGGTGCACATGGAGGGCTCCGTGAACGGC	1	36	Insertion and Deletion	0	0		22	MRFPSIFTAVLFAASSALAAS*											MRFPSIFTAVLFAASSALAASKKKKKASGVSKGEEDNMAIIKEFMRFKVHMEGSVNG	ATGAGATTTCCTTCAATTTTTACTGCTGTTTTATTCGCAGCATCCTCCGCATTAGCTGCTAGC-------------TAGGTGTTACTTTGTGCAAGCGGTGTGAGCAAGGGCGAGGAGGATAACATGGCCATCATCAAGGAGTTCATGCGCTTCAAGGTGCACATGGAGGGCTCCGTGAACGGC	ATGAGATTTCCTTCAATTTTTACTGCTGTTTTATTCGCAGCATCCTCCGCATTAGCTGCTAGCAAAAAAAAAAAAAAAGCAAGCGGTGTGAGCAAGGGCGAGGAGGATAACATGGCCATCATCAAGGAGTTCATGCGCTTCAAGGTGCACATGGAGGGCTCCGTGAACGGC
ATGAGATTTCCTTCAATTTTTACTGCTGTTTTATTCGCAGCATCCTCCGCATTAGCTGCTAGC-------------TAGgtgttgggtatggCAAGCGGTGTGAGCAAGGGCGAGGAGGATAACATGGCCATCATCAAGGAGTTCATGCGCTTCAAGGTGCACATGGAGGGCTCCGTGAACGGC	1	35	Insertion and Deletion	0	0		22	MRFPSIFTAVLFAASSALAAS*											MRFPSIFTAVLFAASSALAASKKKKKASGVSKGEEDNMAIIKEFMRFKVHMEGSVNG	ATGAGATTTCCTTCAATTTTTACTGCTGTTTTATTCGCAGCATCCTCCGCATTAGCTGCTAGC-------------TAGGTGTTGGGTATGGCAAGCGGTGTGAGCAAGGGCGAGGAGGATAACATGGCCATCATCAAGGAGTTCATGCGCTTCAAGGTGCACATGGAGGGCTCCGTGAACGGC	ATGAGATTTCCTTCAATTTTTACTGCTGTTTTATTCGCAGCATCCTCCGCATTAGCTGCTAGCAAAAAAAAAAAAAAAGCAAGCGGTGTGAGCAAGGGCGAGGAGGATAACATGGCCATCATCAAGGAGTTCATGCGCTTCAAGGTGCACATGGAGGGCTCCGTGAACGGC
ATGAGATTTCCTTCAATTTTTACTGCTGTTTTATTCGCAGCATCCTCCGCATTAGCTGCTAGC-------------TAGgtttttgtgcgcgCAAGCGGTGTGAGCAAGGGCGAGGAGGATAACATGGCCATCATCAAGGAGTTCATGCGCTTCAAGGTGCACATGGAGGGCTCCGTGAACGGC	1	35	Insertion and Deletion	0	0		22	MRFPSIFTAVLFAASSALAAS*											MRFPSIFTAVLFAASSALAASKKKKKASGVSKGEEDNMAIIKEFMRFKVHMEGSVNG	ATGAGATTTCCTTCAATTTTTACTGCTGTTTTATTCGCAGCATCCTCCGCATTAGCTGCTAGC-------------TAGGTTTTTGTGCGCGCAAGCGGTGTGAGCAAGGGCGAGGAGGATAACATGGCCATCATCAAGGAGTTCATGCGCTTCAAGGTGCACATGGAGGGCTCCGTGAACGGC	ATGAGATTTCCTTCAATTTTTACTGCTGTTTTATTCGCAGCATCCTCCGCATTAGCTGCTAGCAAAAAAAAAAAAAAAGCAAGCGGTGTGAGCAAGGGCGAGGAGGATAACATGGCCATCATCAAGGAGTTCATGCGCTTCAAGGTGCACATGGAGGGCTCCGTGAACGGC
ATGAGATTTCCTTCAATTTTTACTGCTGTTTTATTCGCAGCATCCTCCGCATTAGCTGCTAGC-------------TAGtacgtggaccctgCAAGCGGTGTGAGCAAGGGCGAGGAGGATAACATGGCCATCATCAAGGAGTTCATGCGCTTCAAGGTGCACATGGAGGGCTCCGTGAACGGC	1	35	Insertion and Deletion	0	0		22	MRFPSIFTAVLFAASSALAAS*											MRFPSIFTAVLFAASSALAASKKKKKASGVSKGEEDNMAIIKEFMRFKVHMEGSVNG	ATGAGATTTCCTTCAATTTTTACTGCTGTTTTATTCGCAGCATCCTCCGCATTAGCTGCTAGC-------------TAGTACGTGGACCCTGCAAGCGGTGTGAGCAAGGGCGAGGAGGATAACATGGCCATCATCAAGGAGTTCATGCGCTTCAAGGTGCACATGGAGGGCTCCGTGAACGGC	ATGAGATTTCCTTCAATTTTTACTGCTGTTTTATTCGCAGCATCCTCCGCATTAGCTGCTAGCAAAAAAAAAAAAAAAGCAAGCGGTGTGAGCAAGGGCGAGGAGGATAACATGGCCATCATCAAGGAGTTCATGCGCTTCAAGGTGCACATGGAGGGCTCCGTGAACGGC
ATGAGATTTCCTTCAATTTTTACTGCTGTTTTATTCGCAGCATCCTCCGCATTAGCTGCTAGC-------------TAGtactagatcttgCAAGCGGTGTGAGCAAGGGCGAGGAGGATAACATGGCCATCATCAAGGAGTTCATGCGCTTCAAGGTGCACATGGAGGGCTCCGTGAACGGC	1	33	Insertion and Deletion	0	-1		22	MRFPSIFTAVLFAASSALAAS*											MRFPSIFTAVLFAASSALAASKKKKKASGVSKGEEDNMAIIKEFMRFKVHMEGSVNG	ATGAGATTTCCTTCAATTTTTACTGCTGTTTTATTCGCAGCATCCTCCGCATTAGCTGCTAGC-------------TAGTACTAGATCTTGCAAGCGGTGTGAGCAAGGGCGAGGAGGATAACATGGCCATCATCAAGGAGTTCATGCGCTTCAAGGTGCACATGGAGGGCTCCGTGAACGGC	ATGAGATTTCCTTCAATTTTTACTGCTGTTTTATTCGCAGCATCCTCCGCATTAGCTGCTAGCAAAAAAAAAAAAAAAGCAAGCGGTGTGAGCAAGGGCGAGGAGGATAACATGGCCATCATCAAGGAGTTCATGCGCTTCAAGGTGCACATGGAGGGCTCCGTGAACGGC
ATGAGATTTCCTTCAATTTTTACTGCTGTTTTATTCGCAGCATCCTCCGCATTAGCTGCTAGC-------------TAGtactggctgccgCAAGCGGTGTGAGCAAGGGCGAGGAGGATAACATGGCCATCATCAAGGAGTTCATGCGCTTCAAGGTGCACATGGAGGGCTCCGTGAACGGC	1	36	Insertion and Deletion	0	-1		22	MRFPSIFTAVLFAASSALAAS*											MRFPSIFTAVLFAASSALAASKKKKKASGVSKGEEDNMAIIKEFMRFKVHMEGSVNG	ATGAGATTTCCTTCAATTTTTACTGCTGTTTTATTCGCAGCATCCTCCGCATTAGCTGCTAGC-------------TAGTACTGGCTGCCGCAAGCGGTGTGAGCAAGGGCGAGGAGGATAACATGGCCATCATCAAGGAGTTCATGCGCTTCAAGGTGCACATGGAGGGCTCCGTGAACGGC	ATGAGATTTCCTTCAATTTTTACTGCTGTTTTATTCGCAGCATCCTCCGCATTAGCTGCTAGCAAAAAAAAAAAAAAAGCAAGCGGTGTGAGCAAGGGCGAGGAGGATAACATGGCCATCATCAAGGAGTTCATGCGCTTCAAGGTGCACATGGAGGGCTCCGTGAACGGC
ATGAGATTTCCTTCAATTTTTACTGCTGTTTTATTCGCAGCATCCTCCGCATTAGCTGCTAGC-------------TAGtagttgtttgcggCAAGCGGTGTGAGCAAGGGCGAGGAGGATAACATGGCCATCATCAAGGAGTTCATGCGCTTCAAGGTGCACATGGAGGGCTCCGTGAACGGC	1	27	Insertion and Deletion	0	0		22	MRFPSIFTAVLFAASSALAAS*											MRFPSIFTAVLFAASSALAASKKKKKASGVSKGEEDNMAIIKEFMRFKVHMEGSVNG	ATGAGATTTCCTTCAATTTTTACTGCTGTTTTATTCGCAGCATCCTCCGCATTAGCTGCTAGC-------------TAGTAGTTGTTTGCGGCAAGCGGTGTGAGCAAGGGCGAGGAGGATAACATGGCCATCATCAAGGAGTTCATGCGCTTCAAGGTGCACATGGAGGGCTCCGTGAACGGC	ATGAGATTTCCTTCAATTTTTACTGCTGTTTTATTCGCAGCATCCTCCGCATTAGCTGCTAGCAAAAAAAAAAAAAAAGCAAGCGGTGTGAGCAAGGGCGAGGAGGATAACATGGCCATCATCAAGGAGTTCATGCGCTTCAAGGTGCACATGGAGGGCTCCGTGAACGGC
ATGAGATTTCCTTCAATTTTTACTGCTGTTTTATTCGCAGCATCCTCCGCATTAGCTGCTAGC-------------TAGtatcggtgatccgCAAGCGGTGTGAGCAAGGGCGAGGAGGATAACATGGCCATCATCAAGGAGTTCATGCGCTTCAAGGTGCACATGGAGGGCTCCGTGAACGGC	1	32	Insertion and Deletion	0	0		22	MRFPSIFTAVLFAASSALAAS*											MRFPSIFTAVLFAASSALAASKKKKKASGVSKGEEDNMAIIKEFMRFKVHMEGSVNG	ATGAGATTTCCTTCAATTTTTACTGCTGTTTTATTCGCAGCATCCTCCGCATTAGCTGCTAGC-------------TAGTATCGGTGATCCGCAAGCGGTGTGAGCAAGGGCGAGGAGGATAACATGGCCATCATCAAGGAGTTCATGCGCTTCAAGGTGCACATGGAGGGCTCCGTGAACGGC	ATGAGATTTCCTTCAATTTTTACTGCTGTTTTATTCGCAGCATCCTCCGCATTAGCTGCTAGCAAAAAAAAAAAAAAAGCAAGCGGTGTGAGCAAGGGCGAGGAGGATAACATGGCCATCATCAAGGAGTTCATGCGCTTCAAGGTGCACATGGAGGGCTCCGTGAACGGC
ATGAGATTTCCTTCAATTTTTACTGCTGTTTTATTCGCAGCATCCTCCGCATTAGCTGCTAGC-------------TAGtcaggtgcgtttgCAAGCGGTGTGAGCAAGGGCGAGGAGGATAACATGGCCATCATCAAGGAGTTCATGCGCTTCAAGGTGCACATGGAGGGCTCCGTGAACGGC	1	36	Insertion and Deletion	0	0		22	MRFPSIFTAVLFAASSALAAS*											MRFPSIFTAVLFAASSALAASKKKKKASGVSKGEEDNMAIIKEFMRFKVHMEGSVNG	ATGAGATTTCCTTCAATTTTTACTGCTGTTTTATTCGCAGCATCCTCCGCATTAGCTGCTAGC-------------TAGTCAGGTGCGTTTGCAAGCGGTGTGAGCAAGGGCGAGGAGGATAACATGGCCATCATCAAGGAGTTCATGCGCTTCAAGGTGCACATGGAGGGCTCCGTGAACGGC	ATGAGATTTCCTTCAATTTTTACTGCTGTTTTATTCGCAGCATCCTCCGCATTAGCTGCTAGCAAAAAAAAAAAAAAAGCAAGCGGTGTGAGCAAGGGCGAGGAGGATAACATGGCCATCATCAAGGAGTTCATGCGCTTCAAGGTGCACATGGAGGGCTCCGTGAACGGC
ATGAGATTTCCTTCAATTTTTACTGCTGTTTTATTCGCAGCATCCTCCGCATTAGCTGCTAGC-------------TAGtccatatcgcgcgCAAGCGGTGTGAGCAAGGGCGAGGAGGATAACATGGCCATCATCAAGGAGTTCATGCGCTTCAAGGTGCACATGGAGGGCTCCGTGAACGGC	1	34	Insertion and Deletion	0	0		22	MRFPSIFTAVLFAASSALAAS*											MRFPSIFTAVLFAASSALAASKKKKKASGVSKGEEDNMAIIKEFMRFKVHMEGSVNG	ATGAGATTTCCTTCAATTTTTACTGCTGTTTTATTCGCAGCATCCTCCGCATTAGCTGCTAGC-------------TAGTCCATATCGCGCGCAAGCGGTGTGAGCAAGGGCGAGGAGGATAACATGGCCATCATCAAGGAGTTCATGCGCTTCAAGGTGCACATGGAGGGCTCCGTGAACGGC	ATGAGATTTCCTTCAATTTTTACTGCTGTTTTATTCGCAGCATCCTCCGCATTAGCTGCTAGCAAAAAAAAAAAAAAAGCAAGCGGTGTGAGCAAGGGCGAGGAGGATAACATGGCCATCATCAAGGAGTTCATGCGCTTCAAGGTGCACATGGAGGGCTCCGTGAACGGC
ATGAGATTTCCTTCAATTTTTACTGCTGTTTTATTCGCAGCATCCTCCGCATTAGCTGCTAGC-------------TAGtccctttctattgCAAGCGGTGTGAGCAAGGGCGAGGAGGATAACATGGCCATCATCAAGGAGTTCATGCGCTTCAAGGTGCACATGGAGGGCTCCGTGAACGGC	1	33	Insertion and Deletion	0	0		22	MRFPSIFTAVLFAASSALAAS*											MRFPSIFTAVLFAASSALAASKKKKKASGVSKGEEDNMAIIKEFMRFKVHMEGSVNG	ATGAGATTTCCTTCAATTTTTACTGCTGTTTTATTCGCAGCATCCTCCGCATTAGCTGCTAGC-------------TAGTCCCTTTCTATTGCAAGCGGTGTGAGCAAGGGCGAGGAGGATAACATGGCCATCATCAAGGAGTTCATGCGCTTCAAGGTGCACATGGAGGGCTCCGTGAACGGC	ATGAGATTTCCTTCAATTTTTACTGCTGTTTTATTCGCAGCATCCTCCGCATTAGCTGCTAGCAAAAAAAAAAAAAAAGCAAGCGGTGTGAGCAAGGGCGAGGAGGATAACATGGCCATCATCAAGGAGTTCATGCGCTTCAAGGTGCACATGGAGGGCTCCGTGAACGGC
ATGAGATTTCCTTCAATTTTTACTGCTGTTTTATTCGCAGCATCCTCCGCATTAGCTGCTAGC-------------TAGtccggagtgtcggCAAGCGGTGTGAGCAAGGGCGAGGAGGATAACATGGCCATCATCAAGGAGTTCATGCGCTTCAAGGTGCACATGGAGGGCTCCGTGAACGGC	1	35	Insertion and Deletion	0	0		22	MRFPSIFTAVLFAASSALAAS*											MRFPSIFTAVLFAASSALAASKKKKKASGVSKGEEDNMAIIKEFMRFKVHMEGSVNG	ATGAGATTTCCTTCAATTTTTACTGCTGTTTTATTCGCAGCATCCTCCGCATTAGCTGCTAGC-------------TAGTCCGGAGTGTCGGCAAGCGGTGTGAGCAAGGGCGAGGAGGATAACATGGCCATCATCAAGGAGTTCATGCGCTTCAAGGTGCACATGGAGGGCTCCGTGAACGGC	ATGAGATTTCCTTCAATTTTTACTGCTGTTTTATTCGCAGCATCCTCCGCATTAGCTGCTAGCAAAAAAAAAAAAAAAGCAAGCGGTGTGAGCAAGGGCGAGGAGGATAACATGGCCATCATCAAGGAGTTCATGCGCTTCAAGGTGCACATGGAGGGCTCCGTGAACGGC
ATGAGATTTCCTTCAATTTTTACTGCTGTTTTATTCGCAGCATCCTCCGCATTAGCTGCTAGC-------------TAGtccttataccgggCAAGCGGTGTGAGCAAGGGCGAGGAGGATAACATGGCCATCATCAAGGAGTTCATGCGCTTCAAGGTGCACATGGAGGGCTCCGTGAACGGC	1	35	Insertion and Deletion	0	0		22	MRFPSIFTAVLFAASSALAAS*											MRFPSIFTAVLFAASSALAASKKKKKASGVSKGEEDNMAIIKEFMRFKVHMEGSVNG	ATGAGATTTCCTTCAATTTTTACTGCTGTTTTATTCGCAGCATCCTCCGCATTAGCTGCTAGC-------------TAGTCCTTATACCGGGCAAGCGGTGTGAGCAAGGGCGAGGAGGATAACATGGCCATCATCAAGGAGTTCATGCGCTTCAAGGTGCACATGGAGGGCTCCGTGAACGGC	ATGAGATTTCCTTCAATTTTTACTGCTGTTTTATTCGCAGCATCCTCCGCATTAGCTGCTAGCAAAAAAAAAAAAAAAGCAAGCGGTGTGAGCAAGGGCGAGGAGGATAACATGGCCATCATCAAGGAGTTCATGCGCTTCAAGGTGCACATGGAGGGCTCCGTGAACGGC
ATGAGATTTCCTTCAATTTTTACTGCTGTTTTATTCGCAGCATCCTCCGCATTAGCTGCTAGC-------------TAGtcgcgtggagccgCAAGCGGTGTGAGCAAGGGCGAGGAGGATAACATGGCCATCATCAAGGAGTTCATGCGCTTCAAGGTGCACATGGAGGGCTCCGTGAACGGC	1	35	Insertion and Deletion	0	0		22	MRFPSIFTAVLFAASSALAAS*											MRFPSIFTAVLFAASSALAASKKKKKASGVSKGEEDNMAIIKEFMRFKVHMEGSVNG	ATGAGATTTCCTTCAATTTTTACTGCTGTTTTATTCGCAGCATCCTCCGCATTAGCTGCTAGC-------------TAGTCGCGTGGAGCCGCAAGCGGTGTGAGCAAGGGCGAGGAGGATAACATGGCCATCATCAAGGAGTTCATGCGCTTCAAGGTGCACATGGAGGGCTCCGTGAACGGC	ATGAGATTTCCTTCAATTTTTACTGCTGTTTTATTCGCAGCATCCTCCGCATTAGCTGCTAGCAAAAAAAAAAAAAAAGCAAGCGGTGTGAGCAAGGGCGAGGAGGATAACATGGCCATCATCAAGGAGTTCATGCGCTTCAAGGTGCACATGGAGGGCTCCGTGAACGGC
ATGAGATTTCCTTCAATTTTTACTGCTGTTTTATTCGCAGCATCCTCCGCATTAGCTGCTAGC-------------TAGtcggtctgattcgCAAGCGGTGTGAGCAAGGGCGAGGAGGATAACATGGCCATCATCAAGGAGTTCATGCGCTTCAAGGTGCACATGGAGGGCTCCGTGAACGGC	1	33	Insertion and Deletion	0	0		22	MRFPSIFTAVLFAASSALAAS*											MRFPSIFTAVLFAASSALAASKKKKKASGVSKGEEDNMAIIKEFMRFKVHMEGSVNG	ATGAGATTTCCTTCAATTTTTACTGCTGTTTTATTCGCAGCATCCTCCGCATTAGCTGCTAGC-------------TAGTCGGTCTGATTCGCAAGCGGTGTGAGCAAGGGCGAGGAGGATAACATGGCCATCATCAAGGAGTTCATGCGCTTCAAGGTGCACATGGAGGGCTCCGTGAACGGC	ATGAGATTTCCTTCAATTTTTACTGCTGTTTTATTCGCAGCATCCTCCGCATTAGCTGCTAGCAAAAAAAAAAAAAAAGCAAGCGGTGTGAGCAAGGGCGAGGAGGATAACATGGCCATCATCAAGGAGTTCATGCGCTTCAAGGTGCACATGGAGGGCTCCGTGAACGGC
ATGAGATTTCCTTCAATTTTTACTGCTGTTTTATTCGCAGCATCCTCCGCATTAGCTGCTAGC-------------TAGtcgtagccccgggCGAGCGGTGTGAGCAAGGGCGAGGAGGATAACATGGCCATCATCAAGGAGTTCATGCGCTTCAAGGTGCACATGGAGGGCTCCGTGAACGGC	1	35	Insertion and Deletion	0	0		22	MRFPSIFTAVLFAASSALAAS*											MRFPSIFTAVLFAASSALAASKKKKKASGVSKGEEDNMAIIKEFMRFKVHMEGSVNG	ATGAGATTTCCTTCAATTTTTACTGCTGTTTTATTCGCAGCATCCTCCGCATTAGCTGCTAGC-------------TAGTCGTAGCCCCGGGCGAGCGGTGTGAGCAAGGGCGAGGAGGATAACATGGCCATCATCAAGGAGTTCATGCGCTTCAAGGTGCACATGGAGGGCTCCGTGAACGGC	ATGAGATTTCCTTCAATTTTTACTGCTGTTTTATTCGCAGCATCCTCCGCATTAGCTGCTAGCAAAAAAAAAAAAAAAGCAAGCGGTGTGAGCAAGGGCGAGGAGGATAACATGGCCATCATCAAGGAGTTCATGCGCTTCAAGGTGCACATGGAGGGCTCCGTGAACGGC
ATGAGATTTCCTTCAATTTTTACTGCTGTTTTATTCGCAGCATCCTCCGCATTAGCTGCTAGC-------------TAGtgatgcattctggCAAGCGGTGTGAGCAAGGGCGAGGAGGATAACATGGCCATCATCAAGGAGTTCATGCGCTTCAAGGTGCACATGGAGGGCTCCGTGAACGGC	1	35	Insertion and Deletion	0	0		22	MRFPSIFTAVLFAASSALAAS*											MRFPSIFTAVLFAASSALAASKKKKKASGVSKGEEDNMAIIKEFMRFKVHMEGSVNG	ATGAGATTTCCTTCAATTTTTACTGCTGTTTTATTCGCAGCATCCTCCGCATTAGCTGCTAGC-------------TAGTGATGCATTCTGGCAAGCGGTGTGAGCAAGGGCGAGGAGGATAACATGGCCATCATCAAGGAGTTCATGCGCTTCAAGGTGCACATGGAGGGCTCCGTGAACGGC	ATGAGATTTCCTTCAATTTTTACTGCTGTTTTATTCGCAGCATCCTCCGCATTAGCTGCTAGCAAAAAAAAAAAAAAAGCAAGCGGTGTGAGCAAGGGCGAGGAGGATAACATGGCCATCATCAAGGAGTTCATGCGCTTCAAGGTGCACATGGAGGGCTCCGTGAACGGC
ATGAGATTTCCTTCAATTTTTACTGCTGTTTTATTCGCAGCATCCTCCGCATTAGCTGCTAGC-------------TAGtgattcgggggtgCAAGCGGTGTGAGCAAGGGCGAGGAGGATAACATGGCCATCATCAAGGAGTTCATGCGCTTCAAGGTGCACATGGAGGGCTCCGTGAACGGC	1	36	Insertion and Deletion	0	0		22	MRFPSIFTAVLFAASSALAAS*											MRFPSIFTAVLFAASSALAASKKKKKASGVSKGEEDNMAIIKEFMRFKVHMEGSVNG	ATGAGATTTCCTTCAATTTTTACTGCTGTTTTATTCGCAGCATCCTCCGCATTAGCTGCTAGC-------------TAGTGATTCGGGGGTGCAAGCGGTGTGAGCAAGGGCGAGGAGGATAACATGGCCATCATCAAGGAGTTCATGCGCTTCAAGGTGCACATGGAGGGCTCCGTGAACGGC	ATGAGATTTCCTTCAATTTTTACTGCTGTTTTATTCGCAGCATCCTCCGCATTAGCTGCTAGCAAAAAAAAAAAAAAAGCAAGCGGTGTGAGCAAGGGCGAGGAGGATAACATGGCCATCATCAAGGAGTTCATGCGCTTCAAGGTGCACATGGAGGGCTCCGTGAACGGC
ATGAGATTTCCTTCAATTTTTACTGCTGTTTTATTCGCAGCATCCTCCGCATTAGCTGCTAGC-------------TAGtgcctttttggtgCAAGCGGTGTGAGCAAGGGCGAGGAGGATAACATGGCCATCATCAAGGAGTTCATGCGCTTCAAGGTGCACATGGAGGGCTCCGTGAACGGC	1	32	Insertion and Deletion	0	0		22	MRFPSIFTAVLFAASSALAAS*											MRFPSIFTAVLFAASSALAASKKKKKASGVSKGEEDNMAIIKEFMRFKVHMEGSVNG	ATGAGATTTCCTTCAATTTTTACTGCTGTTTTATTCGCAGCATCCTCCGCATTAGCTGCTAGC-------------TAGTGCCTTTTTGGTGCAAGCGGTGTGAGCAAGGGCGAGGAGGATAACATGGCCATCATCAAGGAGTTCATGCGCTTCAAGGTGCACATGGAGGGCTCCGTGAACGGC	ATGAGATTTCCTTCAATTTTTACTGCTGTTTTATTCGCAGCATCCTCCGCATTAGCTGCTAGCAAAAAAAAAAAAAAAGCAAGCGGTGTGAGCAAGGGCGAGGAGGATAACATGGCCATCATCAAGGAGTTCATGCGCTTCAAGGTGCACATGGAGGGCTCCGTGAACGGC
ATGAGATTTCCTTCAATTTTTACTGCTGTTTTATTCGCAGCATCCTCCGCATTAGCTGCTAGC-------------TAGtgcgtacgggttgCAAGCGGTGTGAGCAAGGGCGAGGAGGATAACATGGCCATCATCAAGGAGTTCATGCGCTTCAAGGTGCACATGGAGGGCTCCGTGAACGGC	1	35	Insertion and Deletion	0	0		22	MRFPSIFTAVLFAASSALAAS*											MRFPSIFTAVLFAASSALAASKKKKKASGVSKGEEDNMAIIKEFMRFKVHMEGSVNG	ATGAGATTTCCTTCAATTTTTACTGCTGTTTTATTCGCAGCATCCTCCGCATTAGCTGCTAGC-------------TAGTGCGTACGGGTTGCAAGCGGTGTGAGCAAGGGCGAGGAGGATAACATGGCCATCATCAAGGAGTTCATGCGCTTCAAGGTGCACATGGAGGGCTCCGTGAACGGC	ATGAGATTTCCTTCAATTTTTACTGCTGTTTTATTCGCAGCATCCTCCGCATTAGCTGCTAGCAAAAAAAAAAAAAAAGCAAGCGGTGTGAGCAAGGGCGAGGAGGATAACATGGCCATCATCAAGGAGTTCATGCGCTTCAAGGTGCACATGGAGGGCTCCGTGAACGGC
ATGAGATTTCCTTCAATTTTTACTGCTGTTTTATTCGCAGCATCCTCCGCATTAGCTGCTAGC-------------TAGtgcttccgtatcgCAAGCGGTGTGAGCAAGGGCGAGGAGGATAACATGGCCATCATCAAGGAGTTCATGCGCTTCAAGGTGCACATGGAGGGCTCCGTGAACGGC	1	27	Insertion and Deletion	0	0		22	MRFPSIFTAVLFAASSALAAS*											MRFPSIFTAVLFAASSALAASKKKKKASGVSKGEEDNMAIIKEFMRFKVHMEGSVNG	ATGAGATTTCCTTCAATTTTTACTGCTGTTTTATTCGCAGCATCCTCCGCATTAGCTGCTAGC-------------TAGTGCTTCCGTATCGCAAGCGGTGTGAGCAAGGGCGAGGAGGATAACATGGCCATCATCAAGGAGTTCATGCGCTTCAAGGTGCACATGGAGGGCTCCGTGAACGGC	ATGAGATTTCCTTCAATTTTTACTGCTGTTTTATTCGCAGCATCCTCCGCATTAGCTGCTAGCAAAAAAAAAAAAAAAGCAAGCGGTGTGAGCAAGGGCGAGGAGGATAACATGGCCATCATCAAGGAGTTCATGCGCTTCAAGGTGCACATGGAGGGCTCCGTGAACGGC
ATGAGATTTCCTTCAATTTTTACTGCTGTTTTATTCGCAGCATCCTCCGCATTAGCTGCTAGC-------------TAGtggactagtggcgCAAGCGGTGTGAGCAAGGGCGAGGAGGATAACATGGCCATCATCAAGGAGTTCATGCGCTTCAAGGTGCACATGGAGGGCTCCGTGAACGGC	1	35	Insertion and Deletion	0	0		22	MRFPSIFTAVLFAASSALAAS*											MRFPSIFTAVLFAASSALAASKKKKKASGVSKGEEDNMAIIKEFMRFKVHMEGSVNG	ATGAGATTTCCTTCAATTTTTACTGCTGTTTTATTCGCAGCATCCTCCGCATTAGCTGCTAGC-------------TAGTGGACTAGTGGCGCAAGCGGTGTGAGCAAGGGCGAGGAGGATAACATGGCCATCATCAAGGAGTTCATGCGCTTCAAGGTGCACATGGAGGGCTCCGTGAACGGC	ATGAGATTTCCTTCAATTTTTACTGCTGTTTTATTCGCAGCATCCTCCGCATTAGCTGCTAGCAAAAAAAAAAAAAAAGCAAGCGGTGTGAGCAAGGGCGAGGAGGATAACATGGCCATCATCAAGGAGTTCATGCGCTTCAAGGTGCACATGGAGGGCTCCGTGAACGGC
ATGAGATTTCCTTCAATTTTTACTGCTGTTTTATTCGCAGCATCCTCCGCATTAGCTGCTAGC-------------TAGtggaggtactgtgCAAGCGGTGTGAGCAAGGGCGAGGAGGATAACATGGCCATCATCAAGGAGTTCATGCGCTTCAAGGTGCACATGGAGGGCTCCGTGAACGGC	1	36	Insertion and Deletion	0	0		22	MRFPSIFTAVLFAASSALAAS*											MRFPSIFTAVLFAASSALAASKKKKKASGVSKGEEDNMAIIKEFMRFKVHMEGSVNG	ATGAGATTTCCTTCAATTTTTACTGCTGTTTTATTCGCAGCATCCTCCGCATTAGCTGCTAGC-------------TAGTGGAGGTACTGTGCAAGCGGTGTGAGCAAGGGCGAGGAGGATAACATGGCCATCATCAAGGAGTTCATGCGCTTCAAGGTGCACATGGAGGGCTCCGTGAACGGC	ATGAGATTTCCTTCAATTTTTACTGCTGTTTTATTCGCAGCATCCTCCGCATTAGCTGCTAGCAAAAAAAAAAAAAAAGCAAGCGGTGTGAGCAAGGGCGAGGAGGATAACATGGCCATCATCAAGGAGTTCATGCGCTTCAAGGTGCACATGGAGGGCTCCGTGAACGGC
ATGAGATTTCCTTCAATTTTTACTGCTGTTTTATTCGCAGCATCCTCCGCATTAGCTGCTAGC-------------TAGtggcctagccgtgCAAGCGGTGTGAGCAAGGGCGAGGAGGATAACATGGCCATCATCAAGGAGTTCATGCGCTTCAAGGTGCACATGGAGGGCTCCGTGAACGGC	1	34	Insertion and Deletion	0	0		22	MRFPSIFTAVLFAASSALAAS*											MRFPSIFTAVLFAASSALAASKKKKKASGVSKGEEDNMAIIKEFMRFKVHMEGSVNG	ATGAGATTTCCTTCAATTTTTACTGCTGTTTTATTCGCAGCATCCTCCGCATTAGCTGCTAGC-------------TAGTGGCCTAGCCGTGCAAGCGGTGTGAGCAAGGGCGAGGAGGATAACATGGCCATCATCAAGGAGTTCATGCGCTTCAAGGTGCACATGGAGGGCTCCGTGAACGGC	ATGAGATTTCCTTCAATTTTTACTGCTGTTTTATTCGCAGCATCCTCCGCATTAGCTGCTAGCAAAAAAAAAAAAAAAGCAAGCGGTGTGAGCAAGGGCGAGGAGGATAACATGGCCATCATCAAGGAGTTCATGCGCTTCAAGGTGCACATGGAGGGCTCCGTGAACGGC
ATGAGATTTCCTTCAATTTTTACTGCTGTTTTATTCGCAGCATCCTCCGCATTAGCTGCTAGC-------------TAGtgggcgcttttcgCAAGCGGTGTGAGCAAGGGCGAGGAGGATAACATGGCCATCATCAAGGAGTTCATGCGCTTCAAGGTGCACATGGAGGGCTCCGTGAACGGC	1	36	Insertion and Deletion	0	0		22	MRFPSIFTAVLFAASSALAAS*											MRFPSIFTAVLFAASSALAASKKKKKASGVSKGEEDNMAIIKEFMRFKVHMEGSVNG	ATGAGATTTCCTTCAATTTTTACTGCTGTTTTATTCGCAGCATCCTCCGCATTAGCTGCTAGC-------------TAGTGGGCGCTTTTCGCAAGCGGTGTGAGCAAGGGCGAGGAGGATAACATGGCCATCATCAAGGAGTTCATGCGCTTCAAGGTGCACATGGAGGGCTCCGTGAACGGC	ATGAGATTTCCTTCAATTTTTACTGCTGTTTTATTCGCAGCATCCTCCGCATTAGCTGCTAGCAAAAAAAAAAAAAAAGCAAGCGGTGTGAGCAAGGGCGAGGAGGATAACATGGCCATCATCAAGGAGTTCATGCGCTTCAAGGTGCACATGGAGGGCTCCGTGAACGGC
ATGAGATTTCCTTCAATTTTTACTGCTGTTTTATTCGCAGCATCCTCCGCATTAGCTGCTAGC-------------TAGtgtttcaggtcggCAAGCGGTGTGAGCAAGGGCGAGGAGGATAACATGGCCATCATCAAGGAGTTCATGCGCTTCAAGGTGCACATGGAGGGCTCCGTGAACGGC	1	35	Insertion and Deletion	0	0		22	MRFPSIFTAVLFAASSALAAS*											MRFPSIFTAVLFAASSALAASKKKKKASGVSKGEEDNMAIIKEFMRFKVHMEGSVNG	ATGAGATTTCCTTCAATTTTTACTGCTGTTTTATTCGCAGCATCCTCCGCATTAGCTGCTAGC-------------TAGTGTTTCAGGTCGGCAAGCGGTGTGAGCAAGGGCGAGGAGGATAACATGGCCATCATCAAGGAGTTCATGCGCTTCAAGGTGCACATGGAGGGCTCCGTGAACGGC	ATGAGATTTCCTTCAATTTTTACTGCTGTTTTATTCGCAGCATCCTCCGCATTAGCTGCTAGCAAAAAAAAAAAAAAAGCAAGCGGTGTGAGCAAGGGCGAGGAGGATAACATGGCCATCATCAAGGAGTTCATGCGCTTCAAGGTGCACATGGAGGGCTCCGTGAACGGC
ATGAGATTTCCTTCAATTTTTACTGCTGTTTTATTCGCAGCATCCTCCGCATTAGCTGCTAGC-------------TAGttagcggcgggtgCAAGCGGTGTGAGCAAGGGCGAGGAGGATAACATGGCCATCATCAAGGAGTTCATGCGCTTCAAGGTGCACATGGAGGGCTCCGTGAACGGC	1	30	Insertion and Deletion	0	0		22	MRFPSIFTAVLFAASSALAAS*											MRFPSIFTAVLFAASSALAASKKKKKASGVSKGEEDNMAIIKEFMRFKVHMEGSVNG	ATGAGATTTCCTTCAATTTTTACTGCTGTTTTATTCGCAGCATCCTCCGCATTAGCTGCTAGC-------------TAGTTAGCGGCGGGTGCAAGCGGTGTGAGCAAGGGCGAGGAGGATAACATGGCCATCATCAAGGAGTTCATGCGCTTCAAGGTGCACATGGAGGGCTCCGTGAACGGC	ATGAGATTTCCTTCAATTTTTACTGCTGTTTTATTCGCAGCATCCTCCGCATTAGCTGCTAGCAAAAAAAAAAAAAAAGCAAGCGGTGTGAGCAAGGGCGAGGAGGATAACATGGCCATCATCAAGGAGTTCATGCGCTTCAAGGTGCACATGGAGGGCTCCGTGAACGGC
ATGAGATTTCCTTCAATTTTTACTGCTGTTTTATTCGCAGCATCCTCCGCATTAGCTGCTAGC-------------TAGttagggttgagtgCAAGCGGTGTGAGCAAGGGCGAGGAGGATAACATGGCCATCATCAAGGAGTTCATGCGCTTCAAGGTGCACATGGAGGGCTCCGTGAACGGC	1	35	Insertion and Deletion	0	0		22	MRFPSIFTAVLFAASSALAAS*											MRFPSIFTAVLFAASSALAASKKKKKASGVSKGEEDNMAIIKEFMRFKVHMEGSVNG	ATGAGATTTCCTTCAATTTTTACTGCTGTTTTATTCGCAGCATCCTCCGCATTAGCTGCTAGC-------------TAGTTAGGGTTGAGTGCAAGCGGTGTGAGCAAGGGCGAGGAGGATAACATGGCCATCATCAAGGAGTTCATGCGCTTCAAGGTGCACATGGAGGGCTCCGTGAACGGC	ATGAGATTTCCTTCAATTTTTACTGCTGTTTTATTCGCAGCATCCTCCGCATTAGCTGCTAGCAAAAAAAAAAAAAAAGCAAGCGGTGTGAGCAAGGGCGAGGAGGATAACATGGCCATCATCAAGGAGTTCATGCGCTTCAAGGTGCACATGGAGGGCTCCGTGAACGGC
ATGAGATTTCCTTCAATTTTTACTGCTGTTTTATTCGCAGCATCCTCCGCATTAGCTGCTAGC-------------TAGttatagtggtttgCAAGCGGTGTGAGCAAGGGCGAGGAGGATAACATGGCCATCATCAAGGAGTTCATGCGCTTCAAGGTGCACATGGAGGGCTCCGTGAACGGC	1	35	Insertion and Deletion	0	0		22	MRFPSIFTAVLFAASSALAAS*											MRFPSIFTAVLFAASSALAASKKKKKASGVSKGEEDNMAIIKEFMRFKVHMEGSVNG	ATGAGATTTCCTTCAATTTTTACTGCTGTTTTATTCGCAGCATCCTCCGCATTAGCTGCTAGC-------------TAGTTATAGTGGTTTGCAAGCGGTGTGAGCAAGGGCGAGGAGGATAACATGGCCATCATCAAGGAGTTCATGCGCTTCAAGGTGCACATGGAGGGCTCCGTGAACGGC	ATGAGATTTCCTTCAATTTTTACTGCTGTTTTATTCGCAGCATCCTCCGCATTAGCTGCTAGCAAAAAAAAAAAAAAAGCAAGCGGTGTGAGCAAGGGCGAGGAGGATAACATGGCCATCATCAAGGAGTTCATGCGCTTCAAGGTGCACATGGAGGGCTCCGTGAACGGC
ATGAGATTTCCTTCAATTTTTACTGCTGTTTTATTCGCAGCATCCTCCGCATTAGCTGCTAGC-------------TAGttatttcgaggggCAAGCGGTGTGAGCAAGGGCGAGGAGGATAACATGGCCATCATCAAGGAGTTCATGCGCTTCAAGGTGCACATGGAGGGCTCCGTGAACGGC	1	33	Insertion and Deletion	0	0		22	MRFPSIFTAVLFAASSALAAS*											MRFPSIFTAVLFAASSALAASKKKKKASGVSKGEEDNMAIIKEFMRFKVHMEGSVNG	ATGAGATTTCCTTCAATTTTTACTGCTGTTTTATTCGCAGCATCCTCCGCATTAGCTGCTAGC-------------TAGTTATTTCGAGGGGCAAGCGGTGTGAGCAAGGGCGAGGAGGATAACATGGCCATCATCAAGGAGTTCATGCGCTTCAAGGTGCACATGGAGGGCTCCGTGAACGGC	ATGAGATTTCCTTCAATTTTTACTGCTGTTTTATTCGCAGCATCCTCCGCATTAGCTGCTAGCAAAAAAAAAAAAAAAGCAAGCGGTGTGAGCAAGGGCGAGGAGGATAACATGGCCATCATCAAGGAGTTCATGCGCTTCAAGGTGCACATGGAGGGCTCCGTGAACGGC
ATGAGATTTCCTTCAATTTTTACTGCTGTTTTATTCGCAGCATCCTCCGCATTAGCTGCTAGC-------------TAGttcggggcgatggCAAGCGGTGTGAGCAAGGGCGAGGAGGATAACATGGCCATCATCAAGGAGTTCATGCGCTTCAAGGTGCACATGGAGGGCTCCGTGAACGGC	1	35	Insertion and Deletion	0	0		22	MRFPSIFTAVLFAASSALAAS*											MRFPSIFTAVLFAASSALAASKKKKKASGVSKGEEDNMAIIKEFMRFKVHMEGSVNG	ATGAGATTTCCTTCAATTTTTACTGCTGTTTTATTCGCAGCATCCTCCGCATTAGCTGCTAGC-------------TAGTTCGGGGCGATGGCAAGCGGTGTGAGCAAGGGCGAGGAGGATAACATGGCCATCATCAAGGAGTTCATGCGCTTCAAGGTGCACATGGAGGGCTCCGTGAACGGC	ATGAGATTTCCTTCAATTTTTACTGCTGTTTTATTCGCAGCATCCTCCGCATTAGCTGCTAGCAAAAAAAAAAAAAAAGCAAGCGGTGTGAGCAAGGGCGAGGAGGATAACATGGCCATCATCAAGGAGTTCATGCGCTTCAAGGTGCACATGGAGGGCTCCGTGAACGGC
ATGAGATTTCCTTCAATTTTTACTGCTGTTTTATTCGCAGCATCCTCCGCATTAGCTGCTAGC-------------TAGttctgcttattcgCAAGCGGTGTGAGCAAGGGCGAGGAGGATAACATGGCCATCATCAAGGAGTTCATGCGCTTCAAGGTGCACATGGAGGGCTCCGTGAACGGC	1	36	Insertion and Deletion	0	0		22	MRFPSIFTAVLFAASSALAAS*											MRFPSIFTAVLFAASSALAASKKKKKASGVSKGEEDNMAIIKEFMRFKVHMEGSVNG	ATGAGATTTCCTTCAATTTTTACTGCTGTTTTATTCGCAGCATCCTCCGCATTAGCTGCTAGC-------------TAGTTCTGCTTATTCGCAAGCGGTGTGAGCAAGGGCGAGGAGGATAACATGGCCATCATCAAGGAGTTCATGCGCTTCAAGGTGCACATGGAGGGCTCCGTGAACGGC	ATGAGATTTCCTTCAATTTTTACTGCTGTTTTATTCGCAGCATCCTCCGCATTAGCTGCTAGCAAAAAAAAAAAAAAAGCAAGCGGTGTGAGCAAGGGCGAGGAGGATAACATGGCCATCATCAAGGAGTTCATGCGCTTCAAGGTGCACATGGAGGGCTCCGTGAACGGC
ATGAGATTTCCTTCAATTTTTACTGCTGTTTTATTCGCAGCATCCTCCGCATTAGCTGCTAGC-------------TAGttcttttatttcgCAAGCGGTGTGAGCAAGGGCGAGGAGGATAACATGGCCATCATCAAGGAGTTCATGCGCTTCAAGGTGCACATGGAGGGCTCCGTGAACGGC	1	35	Insertion and Deletion	0	0		22	MRFPSIFTAVLFAASSALAAS*											MRFPSIFTAVLFAASSALAASKKKKKASGVSKGEEDNMAIIKEFMRFKVHMEGSVNG	ATGAGATTTCCTTCAATTTTTACTGCTGTTTTATTCGCAGCATCCTCCGCATTAGCTGCTAGC-------------TAGTTCTTTTATTTCGCAAGCGGTGTGAGCAAGGGCGAGGAGGATAACATGGCCATCATCAAGGAGTTCATGCGCTTCAAGGTGCACATGGAGGGCTCCGTGAACGGC	ATGAGATTTCCTTCAATTTTTACTGCTGTTTTATTCGCAGCATCCTCCGCATTAGCTGCTAGCAAAAAAAAAAAAAAAGCAAGCGGTGTGAGCAAGGGCGAGGAGGATAACATGGCCATCATCAAGGAGTTCATGCGCTTCAAGGTGCACATGGAGGGCTCCGTGAACGGC
ATGAGATTTCCTTCAATTTTTACTGCTGTTTTATTCGCAGCATCCTCCGCATTAGCTGCTAGC-------------TAGttgagttgttgggCAAGCGGTGTGAGCAAGGGCGAGGAGGATAACATGGCCATCATCAAGGAGTTCATGCGCTTCAAGGTGCACATGGAGGGCTCCGTGAACGGC	1	35	Insertion and Deletion	0	0		22	MRFPSIFTAVLFAASSALAAS*											MRFPSIFTAVLFAASSALAASKKKKKASGVSKGEEDNMAIIKEFMRFKVHMEGSVNG	ATGAGATTTCCTTCAATTTTTACTGCTGTTTTATTCGCAGCATCCTCCGCATTAGCTGCTAGC-------------TAGTTGAGTTGTTGGGCAAGCGGTGTGAGCAAGGGCGAGGAGGATAACATGGCCATCATCAAGGAGTTCATGCGCTTCAAGGTGCACATGGAGGGCTCCGTGAACGGC	ATGAGATTTCCTTCAATTTTTACTGCTGTTTTATTCGCAGCATCCTCCGCATTAGCTGCTAGCAAAAAAAAAAAAAAAGCAAGCGGTGTGAGCAAGGGCGAGGAGGATAACATGGCCATCATCAAGGAGTTCATGCGCTTCAAGGTGCACATGGAGGGCTCCGTGAACGGC
ATGAGATTTCCTTCAATTTTTACTGCTGTTTTATTCGCAGCATCCTCCGCATTAGCTGCTAGC-------------TAGttggctgtgagtgCAAGCGGTGTGAGCAAGGGCGAGGAGGATAACATGGCCATCATCAAGGAGTTCATGCGCTTCAAGGTGCACATGGAGGGCTCCGTGAACGGC	1	36	Insertion and Deletion	0	0		22	MRFPSIFTAVLFAASSALAAS*											MRFPSIFTAVLFAASSALAASKKKKKASGVSKGEEDNMAIIKEFMRFKVHMEGSVNG	ATGAGATTTCCTTCAATTTTTACTGCTGTTTTATTCGCAGCATCCTCCGCATTAGCTGCTAGC-------------TAGTTGGCTGTGAGTGCAAGCGGTGTGAGCAAGGGCGAGGAGGATAACATGGCCATCATCAAGGAGTTCATGCGCTTCAAGGTGCACATGGAGGGCTCCGTGAACGGC	ATGAGATTTCCTTCAATTTTTACTGCTGTTTTATTCGCAGCATCCTCCGCATTAGCTGCTAGCAAAAAAAAAAAAAAAGCAAGCGGTGTGAGCAAGGGCGAGGAGGATAACATGGCCATCATCAAGGAGTTCATGCGCTTCAAGGTGCACATGGAGGGCTCCGTGAACGGC
ATGAGATTTCCTTCAATTTTTACTGCTGTTTTATTCGCAGCATCCTCCGCATTAGCTGCTAGC-------------TAGttgtgctttctggCAAGCGGTGTGAGCAAGGGCGAGGAGGATAACATGGCCATCATCAAGGAGTTCATGCGCTTCAAGGTGCACATGGAGGGCTCCGTGAACGGC	1	36	Insertion and Deletion	0	0		22	MRFPSIFTAVLFAASSALAAS*											MRFPSIFTAVLFAASSALAASKKKKKASGVSKGEEDNMAIIKEFMRFKVHMEGSVNG	ATGAGATTTCCTTCAATTTTTACTGCTGTTTTATTCGCAGCATCCTCCGCATTAGCTGCTAGC-------------TAGTTGTGCTTTCTGGCAAGCGGTGTGAGCAAGGGCGAGGAGGATAACATGGCCATCATCAAGGAGTTCATGCGCTTCAAGGTGCACATGGAGGGCTCCGTGAACGGC	ATGAGATTTCCTTCAATTTTTACTGCTGTTTTATTCGCAGCATCCTCCGCATTAGCTGCTAGCAAAAAAAAAAAAAAAGCAAGCGGTGTGAGCAAGGGCGAGGAGGATAACATGGCCATCATCAAGGAGTTCATGCGCTTCAAGGTGCACATGGAGGGCTCCGTGAACGGC
ATGAGATTTCCTTCAATTTTTACTGCTGTTTTATTCGCAGCATCCTCCGCATTAGCTGCTAGC-------------TAGtttcattgccgcgCAAGCGGTGTGAGCAAGGGCGAGGAGGATAACATGGCCATCATCAAGGAGTTCATGCGCTTCAAGGTGCACATGGAGGGCTCCGTGAACGGC	1	31	Insertion and Deletion	0	0		22	MRFPSIFTAVLFAASSALAAS*											MRFPSIFTAVLFAASSALAASKKKKKASGVSKGEEDNMAIIKEFMRFKVHMEGSVNG	ATGAGATTTCCTTCAATTTTTACTGCTGTTTTATTCGCAGCATCCTCCGCATTAGCTGCTAGC-------------TAGTTTCATTGCCGCGCAAGCGGTGTGAGCAAGGGCGAGGAGGATAACATGGCCATCATCAAGGAGTTCATGCGCTTCAAGGTGCACATGGAGGGCTCCGTGAACGGC	ATGAGATTTCCTTCAATTTTTACTGCTGTTTTATTCGCAGCATCCTCCGCATTAGCTGCTAGCAAAAAAAAAAAAAAAGCAAGCGGTGTGAGCAAGGGCGAGGAGGATAACATGGCCATCATCAAGGAGTTCATGCGCTTCAAGGTGCACATGGAGGGCTCCGTGAACGGC
ATGAGATTTCCTTCAATTTTTACTGCTGTTTTATTCGCAGCATCCTCCGCATTAGCTGCTAGC-------------TAGtttgagcccgtcgCAAGCGGTGTGAGCAAGGGCGAGGAGGATAACATGGCCATCATCAAGGAGTTCATGCGCTTCAAGGTGCACATGGAGGGCTCCGTGAACGGC	1	36	Insertion and Deletion	0	0		22	MRFPSIFTAVLFAASSALAAS*											MRFPSIFTAVLFAASSALAASKKKKKASGVSKGEEDNMAIIKEFMRFKVHMEGSVNG	ATGAGATTTCCTTCAATTTTTACTGCTGTTTTATTCGCAGCATCCTCCGCATTAGCTGCTAGC-------------TAGTTTGAGCCCGTCGCAAGCGGTGTGAGCAAGGGCGAGGAGGATAACATGGCCATCATCAAGGAGTTCATGCGCTTCAAGGTGCACATGGAGGGCTCCGTGAACGGC	ATGAGATTTCCTTCAATTTTTACTGCTGTTTTATTCGCAGCATCCTCCGCATTAGCTGCTAGCAAAAAAAAAAAAAAAGCAAGCGGTGTGAGCAAGGGCGAGGAGGATAACATGGCCATCATCAAGGAGTTCATGCGCTTCAAGGTGCACATGGAGGGCTCCGTGAACGGC
ATGAGATTTCCTTCAATTTTTACTGCTGTTTTATTCGCAGCATCCTCCGCATTAGCTGCTAGC-------------TAGtttgaggtttgggCAAGCGGTGTGAGCAAGGGCGAGGAGGATAACATGGCCATCATCAAGGAGTTCATGCGCTTCAAGGTGCACATGGAGGGCTCCGTGAACGGC	1	29	Insertion and Deletion	0	0		22	MRFPSIFTAVLFAASSALAAS*											MRFPSIFTAVLFAASSALAASKKKKKASGVSKGEEDNMAIIKEFMRFKVHMEGSVNG	ATGAGATTTCCTTCAATTTTTACTGCTGTTTTATTCGCAGCATCCTCCGCATTAGCTGCTAGC-------------TAGTTTGAGGTTTGGGCAAGCGGTGTGAGCAAGGGCGAGGAGGATAACATGGCCATCATCAAGGAGTTCATGCGCTTCAAGGTGCACATGGAGGGCTCCGTGAACGGC	ATGAGATTTCCTTCAATTTTTACTGCTGTTTTATTCGCAGCATCCTCCGCATTAGCTGCTAGCAAAAAAAAAAAAAAAGCAAGCGGTGTGAGCAAGGGCGAGGAGGATAACATGGCCATCATCAAGGAGTTCATGCGCTTCAAGGTGCACATGGAGGGCTCCGTGAACGGC
ATGAGATTTCCTTCAATTTTTACTGCTGTTTTATTCGCAGCATCCTCCGCATTAGCTGCTAGC-------------TAGtttgatgtagttgCAAGCGGTGTGAGCAAGGGCGAGGAGGATAACATGGCCATCATCAAGGAGTTCATGCGCTTCAAGGTGCACATGGAGGGCTCCGTGAACGGC	1	27	Insertion and Deletion	0	0		22	MRFPSIFTAVLFAASSALAAS*											MRFPSIFTAVLFAASSALAASKKKKKASGVSKGEEDNMAIIKEFMRFKVHMEGSVNG	ATGAGATTTCCTTCAATTTTTACTGCTGTTTTATTCGCAGCATCCTCCGCATTAGCTGCTAGC-------------TAGTTTGATGTAGTTGCAAGCGGTGTGAGCAAGGGCGAGGAGGATAACATGGCCATCATCAAGGAGTTCATGCGCTTCAAGGTGCACATGGAGGGCTCCGTGAACGGC	ATGAGATTTCCTTCAATTTTTACTGCTGTTTTATTCGCAGCATCCTCCGCATTAGCTGCTAGCAAAAAAAAAAAAAAAGCAAGCGGTGTGAGCAAGGGCGAGGAGGATAACATGGCCATCATCAAGGAGTTCATGCGCTTCAAGGTGCACATGGAGGGCTCCGTGAACGGC
ATGAGATTTCCTTCAATTTTTACTGCTGTTTTATTCGCAGCATCCTCCGCATTAGCTGCTAGC------------TAACcccagagccccgCAAGCGGTGTGAGCAAGGGCGAGGAGGATAACATGGCCATCATCAAGGAGTTCATGCGCTTCAAGGTGCACATGGAGGGCTCCGTGAACGGC	1	31	Insertion and Deletion	0	0		22	MRFPSIFTAVLFAASSALAAS*											MRFPSIFTAVLFAASSALAASKKKKKASGVSKGEEDNMAIIKEFMRFKVHMEGSVNG	ATGAGATTTCCTTCAATTTTTACTGCTGTTTTATTCGCAGCATCCTCCGCATTAGCTGCTAGC------------TAACCCCAGAGCCCCGCAAGCGGTGTGAGCAAGGGCGAGGAGGATAACATGGCCATCATCAAGGAGTTCATGCGCTTCAAGGTGCACATGGAGGGCTCCGTGAACGGC	ATGAGATTTCCTTCAATTTTTACTGCTGTTTTATTCGCAGCATCCTCCGCATTAGCTGCTAGCAAAAAAAAAAAAAAAGCAAGCGGTGTGAGCAAGGGCGAGGAGGATAACATGGCCATCATCAAGGAGTTCATGCGCTTCAAGGTGCACATGGAGGGCTCCGTGAACGGC
ATGAGATTTCCTTCAATTTTTACTGCTGTTTTATTCGCAGCATCCTCCGCATTAGCTGCTAGC------------TAACccgccactctcgCAAGCGGTGTGAGCAAGGGCGAGGAGGATAACATGGCCATCATCAAGGAGTTCATGCGCTTCAAGGTGCACATGGAGGGCTCCGTGAACGGC	1	37	Insertion and Deletion	0	0		22	MRFPSIFTAVLFAASSALAAS*											MRFPSIFTAVLFAASSALAASKKKKKASGVSKGEEDNMAIIKEFMRFKVHMEGSVNG	ATGAGATTTCCTTCAATTTTTACTGCTGTTTTATTCGCAGCATCCTCCGCATTAGCTGCTAGC------------TAACCCGCCACTCTCGCAAGCGGTGTGAGCAAGGGCGAGGAGGATAACATGGCCATCATCAAGGAGTTCATGCGCTTCAAGGTGCACATGGAGGGCTCCGTGAACGGC	ATGAGATTTCCTTCAATTTTTACTGCTGTTTTATTCGCAGCATCCTCCGCATTAGCTGCTAGCAAAAAAAAAAAAAAAGCAAGCGGTGTGAGCAAGGGCGAGGAGGATAACATGGCCATCATCAAGGAGTTCATGCGCTTCAAGGTGCACATGGAGGGCTCCGTGAACGGC
ATGAGATTTCCTTCAATTTTTACTGCTGTTTTATTCGCAGCATCCTCCGCATTAGCTGCTAGC------------TAACccttattacgtgCAAGCGGTGTGAGCAAGGGCGAGGAGGATAACATGGCCATCATCAAGGAGTTCATGCGCTTCAAGGTGCACATGGAGGGCTCCGTGAACGGC	1	34	Insertion and Deletion	0	0		22	MRFPSIFTAVLFAASSALAAS*											MRFPSIFTAVLFAASSALAASKKKKKASGVSKGEEDNMAIIKEFMRFKVHMEGSVNG	ATGAGATTTCCTTCAATTTTTACTGCTGTTTTATTCGCAGCATCCTCCGCATTAGCTGCTAGC------------TAACCCTTATTACGTGCAAGCGGTGTGAGCAAGGGCGAGGAGGATAACATGGCCATCATCAAGGAGTTCATGCGCTTCAAGGTGCACATGGAGGGCTCCGTGAACGGC	ATGAGATTTCCTTCAATTTTTACTGCTGTTTTATTCGCAGCATCCTCCGCATTAGCTGCTAGCAAAAAAAAAAAAAAAGCAAGCGGTGTGAGCAAGGGCGAGGAGGATAACATGGCCATCATCAAGGAGTTCATGCGCTTCAAGGTGCACATGGAGGGCTCCGTGAACGGC
ATGAGATTTCCTTCAATTTTTACTGCTGTTTTATTCGCAGCATCCTCCGCATTAGCTGCTAGC------------TAACcgaggtttatggCAAGCGGTGTGAGCAAGGGCGAGGAGGATAACATGGCCATCATCAAGGAGTTCATGCGCTTCAAGGTGCACATGGAGGGCTCCGTGAACGGC	1	35	Insertion and Deletion	0	0		22	MRFPSIFTAVLFAASSALAAS*											MRFPSIFTAVLFAASSALAASKKKKKASGVSKGEEDNMAIIKEFMRFKVHMEGSVNG	ATGAGATTTCCTTCAATTTTTACTGCTGTTTTATTCGCAGCATCCTCCGCATTAGCTGCTAGC------------TAACCGAGGTTTATGGCAAGCGGTGTGAGCAAGGGCGAGGAGGATAACATGGCCATCATCAAGGAGTTCATGCGCTTCAAGGTGCACATGGAGGGCTCCGTGAACGGC	ATGAGATTTCCTTCAATTTTTACTGCTGTTTTATTCGCAGCATCCTCCGCATTAGCTGCTAGCAAAAAAAAAAAAAAAGCAAGCGGTGTGAGCAAGGGCGAGGAGGATAACATGGCCATCATCAAGGAGTTCATGCGCTTCAAGGTGCACATGGAGGGCTCCGTGAACGGC
ATGAGATTTCCTTCAATTTTTACTGCTGTTTTATTCGCAGCATCCTCCGCATTAGCTGCTAGC------------TAACcttaggtactggCAAGCGGTGTGAGCAAGGGCGAGGAGGATAACATGGCCATCATCAAGGAGTTCATGCGCTTCAAGGTGCACATGGAGGGCTCCGTGAACGGC	1	36	Insertion and Deletion	0	0		22	MRFPSIFTAVLFAASSALAAS*											MRFPSIFTAVLFAASSALAASKKKKKASGVSKGEEDNMAIIKEFMRFKVHMEGSVNG	ATGAGATTTCCTTCAATTTTTACTGCTGTTTTATTCGCAGCATCCTCCGCATTAGCTGCTAGC------------TAACCTTAGGTACTGGCAAGCGGTGTGAGCAAGGGCGAGGAGGATAACATGGCCATCATCAAGGAGTTCATGCGCTTCAAGGTGCACATGGAGGGCTCCGTGAACGGC	ATGAGATTTCCTTCAATTTTTACTGCTGTTTTATTCGCAGCATCCTCCGCATTAGCTGCTAGCAAAAAAAAAAAAAAAGCAAGCGGTGTGAGCAAGGGCGAGGAGGATAACATGGCCATCATCAAGGAGTTCATGCGCTTCAAGGTGCACATGGAGGGCTCCGTGAACGGC
ATGAGATTTCCTTCAATTTTTACTGCTGTTTTATTCGCAGCATCCTCCGCATTAGCTGCTAGC------------TAACcttttccatgggCAAGCGGTGTGAGCAAGGGCGAGGAGGATAACATGGCCATCATCAAGGAGTTCATGCGCTTCAAGGTGCACATGGAGGGCTCCGTGAACGGC	1	36	Insertion and Deletion	0	0		22	MRFPSIFTAVLFAASSALAAS*											MRFPSIFTAVLFAASSALAASKKKKKASGVSKGEEDNMAIIKEFMRFKVHMEGSVNG	ATGAGATTTCCTTCAATTTTTACTGCTGTTTTATTCGCAGCATCCTCCGCATTAGCTGCTAGC------------TAACCTTTTCCATGGGCAAGCGGTGTGAGCAAGGGCGAGGAGGATAACATGGCCATCATCAAGGAGTTCATGCGCTTCAAGGTGCACATGGAGGGCTCCGTGAACGGC	ATGAGATTTCCTTCAATTTTTACTGCTGTTTTATTCGCAGCATCCTCCGCATTAGCTGCTAGCAAAAAAAAAAAAAAAGCAAGCGGTGTGAGCAAGGGCGAGGAGGATAACATGGCCATCATCAAGGAGTTCATGCGCTTCAAGGTGCACATGGAGGGCTCCGTGAACGGC
ATGAGATTTCCTTCAATTTTTACTGCTGTTTTATTCGCAGCATCCTCCGCATTAGCTGCTAGC------------TAACgatctcaggtggCAAGCGGTGTGAGCAAGGGCGAGGAGGATAACATGGCCATCATCAAGGAGTTCATGCGCTTCAAGGTGCACATGGAGGGCTCCGTGAACGGC	1	34	Insertion and Deletion	0	0		22	MRFPSIFTAVLFAASSALAAS*											MRFPSIFTAVLFAASSALAASKKKKKASGVSKGEEDNMAIIKEFMRFKVHMEGSVNG	ATGAGATTTCCTTCAATTTTTACTGCTGTTTTATTCGCAGCATCCTCCGCATTAGCTGCTAGC------------TAACGATCTCAGGTGGCAAGCGGTGTGAGCAAGGGCGAGGAGGATAACATGGCCATCATCAAGGAGTTCATGCGCTTCAAGGTGCACATGGAGGGCTCCGTGAACGGC	ATGAGATTTCCTTCAATTTTTACTGCTGTTTTATTCGCAGCATCCTCCGCATTAGCTGCTAGCAAAAAAAAAAAAAAAGCAAGCGGTGTGAGCAAGGGCGAGGAGGATAACATGGCCATCATCAAGGAGTTCATGCGCTTCAAGGTGCACATGGAGGGCTCCGTGAACGGC
ATGAGATTTCCTTCAATTTTTACTGCTGTTTTATTCGCAGCATCCTCCGCATTAGCTGCTAGC------------TAACgttttacttggCAAGCGGTGTGAGCAAGGGCGAGGAGGATAACATGGCCATCATCAAGGAGTTCATGCGCTTCAAGGTGCACATGGAGGGCTCCGTGAACGGC	1	36	Insertion and Deletion	0	-1		22	MRFPSIFTAVLFAASSALAAS*											MRFPSIFTAVLFAASSALAASKKKKKASGVSKGEEDNMAIIKEFMRFKVHMEGSVNG	ATGAGATTTCCTTCAATTTTTACTGCTGTTTTATTCGCAGCATCCTCCGCATTAGCTGCTAGC------------TAACGTTTTACTTGGCAAGCGGTGTGAGCAAGGGCGAGGAGGATAACATGGCCATCATCAAGGAGTTCATGCGCTTCAAGGTGCACATGGAGGGCTCCGTGAACGGC	ATGAGATTTCCTTCAATTTTTACTGCTGTTTTATTCGCAGCATCCTCCGCATTAGCTGCTAGCAAAAAAAAAAAAAAAGCAAGCGGTGTGAGCAAGGGCGAGGAGGATAACATGGCCATCATCAAGGAGTTCATGCGCTTCAAGGTGCACATGGAGGGCTCCGTGAACGGC
ATGAGATTTCCTTCAATTTTTACTGCTGTTTTATTCGCAGCATCCTCCGCATTAGCTGCTAGC------------TAACtatgtgattcggCAAGCGGTGTGAGCAAGGGCGAGGAGGATAACATGGCCATCATCAAGGAGTTCATGCGCTTCAAGGTGCACATGGAGGGCTCCGTGAACGGC	1	35	Insertion and Deletion	0	0		22	MRFPSIFTAVLFAASSALAAS*											MRFPSIFTAVLFAASSALAASKKKKKASGVSKGEEDNMAIIKEFMRFKVHMEGSVNG	ATGAGATTTCCTTCAATTTTTACTGCTGTTTTATTCGCAGCATCCTCCGCATTAGCTGCTAGC------------TAACTATGTGATTCGGCAAGCGGTGTGAGCAAGGGCGAGGAGGATAACATGGCCATCATCAAGGAGTTCATGCGCTTCAAGGTGCACATGGAGGGCTCCGTGAACGGC	ATGAGATTTCCTTCAATTTTTACTGCTGTTTTATTCGCAGCATCCTCCGCATTAGCTGCTAGCAAAAAAAAAAAAAAAGCAAGCGGTGTGAGCAAGGGCGAGGAGGATAACATGGCCATCATCAAGGAGTTCATGCGCTTCAAGGTGCACATGGAGGGCTCCGTGAACGGC
ATGAGATTTCCTTCAATTTTTACTGCTGTTTTATTCGCAGCATCCTCCGCATTAGCTGCTAGC------------TAACtcgcctatgccgCAAGCGGTGTGAGCAAGGGCGAGGAGGATAACATGGCCATCATCAAGGAGTTCATGCGCTTCAAGGTGCACATGGAGGGCTCCGTGAACGGC	1	36	Insertion and Deletion	0	0		22	MRFPSIFTAVLFAASSALAAS*											MRFPSIFTAVLFAASSALAASKKKKKASGVSKGEEDNMAIIKEFMRFKVHMEGSVNG	ATGAGATTTCCTTCAATTTTTACTGCTGTTTTATTCGCAGCATCCTCCGCATTAGCTGCTAGC------------TAACTCGCCTATGCCGCAAGCGGTGTGAGCAAGGGCGAGGAGGATAACATGGCCATCATCAAGGAGTTCATGCGCTTCAAGGTGCACATGGAGGGCTCCGTGAACGGC	ATGAGATTTCCTTCAATTTTTACTGCTGTTTTATTCGCAGCATCCTCCGCATTAGCTGCTAGCAAAAAAAAAAAAAAAGCAAGCGGTGTGAGCAAGGGCGAGGAGGATAACATGGCCATCATCAAGGAGTTCATGCGCTTCAAGGTGCACATGGAGGGCTCCGTGAACGGC
ATGAGATTTCCTTCAATTTTTACTGCTGTTTTATTCGCAGCATCCTCCGCATTAGCTGCTAGC------------TAACtctgcgagcctgCAAGCGGTGTGAGCAAGGGCGAGGAGGATAACATGGCCATCATCAAGGAGTTCATGCGCTTCAAGGTGCACATGGAGGGCTCCGTGAACGGC	1	34	Insertion and Deletion	0	0		22	MRFPSIFTAVLFAASSALAAS*											MRFPSIFTAVLFAASSALAASKKKKKASGVSKGEEDNMAIIKEFMRFKVHMEGSVNG	ATGAGATTTCCTTCAATTTTTACTGCTGTTTTATTCGCAGCATCCTCCGCATTAGCTGCTAGC------------TAACTCTGCGAGCCTGCAAGCGGTGTGAGCAAGGGCGAGGAGGATAACATGGCCATCATCAAGGAGTTCATGCGCTTCAAGGTGCACATGGAGGGCTCCGTGAACGGC	ATGAGATTTCCTTCAATTTTTACTGCTGTTTTATTCGCAGCATCCTCCGCATTAGCTGCTAGCAAAAAAAAAAAAAAAGCAAGCGGTGTGAGCAAGGGCGAGGAGGATAACATGGCCATCATCAAGGAGTTCATGCGCTTCAAGGTGCACATGGAGGGCTCCGTGAACGGC
ATGAGATTTCCTTCAATTTTTACTGCTGTTTTATTCGCAGCATCCTCCGCATTAGCTGCTAGC------------TAACtgtatgtttgggCAAGCGGTGTGAGCAAGGGCGAGGAGGATAACATGGCCATCATCAAGGAGTTCATGCGCTTCAAGGTGCACATGGAGGGCTCCGTGAACGGC	1	33	Insertion and Deletion	0	0		22	MRFPSIFTAVLFAASSALAAS*											MRFPSIFTAVLFAASSALAASKKKKKASGVSKGEEDNMAIIKEFMRFKVHMEGSVNG	ATGAGATTTCCTTCAATTTTTACTGCTGTTTTATTCGCAGCATCCTCCGCATTAGCTGCTAGC------------TAACTGTATGTTTGGGCAAGCGGTGTGAGCAAGGGCGAGGAGGATAACATGGCCATCATCAAGGAGTTCATGCGCTTCAAGGTGCACATGGAGGGCTCCGTGAACGGC	ATGAGATTTCCTTCAATTTTTACTGCTGTTTTATTCGCAGCATCCTCCGCATTAGCTGCTAGCAAAAAAAAAAAAAAAGCAAGCGGTGTGAGCAAGGGCGAGGAGGATAACATGGCCATCATCAAGGAGTTCATGCGCTTCAAGGTGCACATGGAGGGCTCCGTGAACGGC
ATGAGATTTCCTTCAATTTTTACTGCTGTTTTATTCGCAGCATCCTCCGCATTAGCTGCTAGC------------TAACtgtccggcgtggCAAGCGGTGTGAGCAAGGGCGAGGAGGATAACATGGCCATCATCAAGGAGTTCATGCGCTTCAAGGTGCACATGGAGGGCTCCGTGAACGGC	1	33	Insertion and Deletion	0	0		22	MRFPSIFTAVLFAASSALAAS*											MRFPSIFTAVLFAASSALAASKKKKKASGVSKGEEDNMAIIKEFMRFKVHMEGSVNG	ATGAGATTTCCTTCAATTTTTACTGCTGTTTTATTCGCAGCATCCTCCGCATTAGCTGCTAGC------------TAACTGTCCGGCGTGGCAAGCGGTGTGAGCAAGGGCGAGGAGGATAACATGGCCATCATCAAGGAGTTCATGCGCTTCAAGGTGCACATGGAGGGCTCCGTGAACGGC	ATGAGATTTCCTTCAATTTTTACTGCTGTTTTATTCGCAGCATCCTCCGCATTAGCTGCTAGCAAAAAAAAAAAAAAAGCAAGCGGTGTGAGCAAGGGCGAGGAGGATAACATGGCCATCATCAAGGAGTTCATGCGCTTCAAGGTGCACATGGAGGGCTCCGTGAACGGC
ATGAGATTTCCTTCAATTTTTACTGCTGTTTTATTCGCAGCATCCTCCGCATTAGCTGCTAGC------------TAACtgtgagtcgcggCAAGCGGTGTGAGCAAGGGCGAGGAGGATAACATGGCCATCATCAAGGAGTTCATGCGCTTCAAGGTGCACATGGAGGGCTCCGTGAACGGC	1	35	Insertion and Deletion	0	0		22	MRFPSIFTAVLFAASSALAAS*											MRFPSIFTAVLFAASSALAASKKKKKASGVSKGEEDNMAIIKEFMRFKVHMEGSVNG	ATGAGATTTCCTTCAATTTTTACTGCTGTTTTATTCGCAGCATCCTCCGCATTAGCTGCTAGC------------TAACTGTGAGTCGCGGCAAGCGGTGTGAGCAAGGGCGAGGAGGATAACATGGCCATCATCAAGGAGTTCATGCGCTTCAAGGTGCACATGGAGGGCTCCGTGAACGGC	ATGAGATTTCCTTCAATTTTTACTGCTGTTTTATTCGCAGCATCCTCCGCATTAGCTGCTAGCAAAAAAAAAAAAAAAGCAAGCGGTGTGAGCAAGGGCGAGGAGGATAACATGGCCATCATCAAGGAGTTCATGCGCTTCAAGGTGCACATGGAGGGCTCCGTGAACGGC
ATGAGATTTCCTTCAATTTTTACTGCTGTTTTATTCGCAGCATCCTCCGCATTAGCTGCTAGC------------TAACttccagtgttcgCAAGCGGTGTGAGCAAGGGCGAGGAGGATAACATGGCCATCATCAAGGAGTTCATGCGCTTCAAGGTGCACATGGAGGGCTCCGTGAACGGC	1	36	Insertion and Deletion	0	0		22	MRFPSIFTAVLFAASSALAAS*											MRFPSIFTAVLFAASSALAASKKKKKASGVSKGEEDNMAIIKEFMRFKVHMEGSVNG	ATGAGATTTCCTTCAATTTTTACTGCTGTTTTATTCGCAGCATCCTCCGCATTAGCTGCTAGC------------TAACTTCCAGTGTTCGCAAGCGGTGTGAGCAAGGGCGAGGAGGATAACATGGCCATCATCAAGGAGTTCATGCGCTTCAAGGTGCACATGGAGGGCTCCGTGAACGGC	ATGAGATTTCCTTCAATTTTTACTGCTGTTTTATTCGCAGCATCCTCCGCATTAGCTGCTAGCAAAAAAAAAAAAAAAGCAAGCGGTGTGAGCAAGGGCGAGGAGGATAACATGGCCATCATCAAGGAGTTCATGCGCTTCAAGGTGCACATGGAGGGCTCCGTGAACGGC
ATGAGATTTCCTTCAATTTTTACTGCTGTTTTATTCGCAGCATCCTCCGCATTAGCTGCTAGC------------TAACttcgccctcgtgCAAGCGGTGTGAGCAAGGGCGAGGAGGATAACATGGCCATCATCAAGGAGTTCATGCGCTTCAAGGTGCACATGGAGGGCTCCGTGAACGGC	1	36	Insertion and Deletion	0	0		22	MRFPSIFTAVLFAASSALAAS*											MRFPSIFTAVLFAASSALAASKKKKKASGVSKGEEDNMAIIKEFMRFKVHMEGSVNG	ATGAGATTTCCTTCAATTTTTACTGCTGTTTTATTCGCAGCATCCTCCGCATTAGCTGCTAGC------------TAACTTCGCCCTCGTGCAAGCGGTGTGAGCAAGGGCGAGGAGGATAACATGGCCATCATCAAGGAGTTCATGCGCTTCAAGGTGCACATGGAGGGCTCCGTGAACGGC	ATGAGATTTCCTTCAATTTTTACTGCTGTTTTATTCGCAGCATCCTCCGCATTAGCTGCTAGCAAAAAAAAAAAAAAAGCAAGCGGTGTGAGCAAGGGCGAGGAGGATAACATGGCCATCATCAAGGAGTTCATGCGCTTCAAGGTGCACATGGAGGGCTCCGTGAACGGC
ATGAGATTTCCTTCAATTTTTACTGCTGTTTTATTCGCAGCATCCTCCGCATTAGCTGCTAGC------------TAACttgcacccctcgCAAGCGGTGTGAGCAAGGGCGAGGAGGATAACATGGCCATCATCAAGGAGTTCATGCGCTTCAAGGTGCACATGGAGGGCTCCGTGAACGGC	1	33	Insertion and Deletion	0	0		22	MRFPSIFTAVLFAASSALAAS*											MRFPSIFTAVLFAASSALAASKKKKKASGVSKGEEDNMAIIKEFMRFKVHMEGSVNG	ATGAGATTTCCTTCAATTTTTACTGCTGTTTTATTCGCAGCATCCTCCGCATTAGCTGCTAGC------------TAACTTGCACCCCTCGCAAGCGGTGTGAGCAAGGGCGAGGAGGATAACATGGCCATCATCAAGGAGTTCATGCGCTTCAAGGTGCACATGGAGGGCTCCGTGAACGGC	ATGAGATTTCCTTCAATTTTTACTGCTGTTTTATTCGCAGCATCCTCCGCATTAGCTGCTAGCAAAAAAAAAAAAAAAGCAAGCGGTGTGAGCAAGGGCGAGGAGGATAACATGGCCATCATCAAGGAGTTCATGCGCTTCAAGGTGCACATGGAGGGCTCCGTGAACGGC
ATGAGATTTCCTTCAATTTTTACTGCTGTTTTATTCGCAGCATCCTCCGCATTAGCTGCTAGC------------TAACtttcgtgacttgCAAGCGGTGTGAGCAAGGGCGAGGAGGATAACATGGCCATCATCAAGGAGTTCATGCGCTTCAAGGTGCACATGGAGGGCTCCGTGAACGGC	1	31	Insertion and Deletion	0	0		22	MRFPSIFTAVLFAASSALAAS*											MRFPSIFTAVLFAASSALAASKKKKKASGVSKGEEDNMAIIKEFMRFKVHMEGSVNG	ATGAGATTTCCTTCAATTTTTACTGCTGTTTTATTCGCAGCATCCTCCGCATTAGCTGCTAGC------------TAACTTTCGTGACTTGCAAGCGGTGTGAGCAAGGGCGAGGAGGATAACATGGCCATCATCAAGGAGTTCATGCGCTTCAAGGTGCACATGGAGGGCTCCGTGAACGGC	ATGAGATTTCCTTCAATTTTTACTGCTGTTTTATTCGCAGCATCCTCCGCATTAGCTGCTAGCAAAAAAAAAAAAAAAGCAAGCGGTGTGAGCAAGGGCGAGGAGGATAACATGGCCATCATCAAGGAGTTCATGCGCTTCAAGGTGCACATGGAGGGCTCCGTGAACGGC
ATGAGATTTCCTTCAATTTTTACTGCTGTTTTATTCGCAGCATCCTCCGCATTAGCTGCTAGC------------TAACtttgtctttttgCAAGCGGTGTGAGCAAGGGCGAGGAGGATAACATGGCCATCATCAAGGAGTTCATGCGCTTCAAGGTGCACATGGAGGGCTCCGTGAACGGC	1	35	Insertion and Deletion	0	0		22	MRFPSIFTAVLFAASSALAAS*											MRFPSIFTAVLFAASSALAASKKKKKASGVSKGEEDNMAIIKEFMRFKVHMEGSVNG	ATGAGATTTCCTTCAATTTTTACTGCTGTTTTATTCGCAGCATCCTCCGCATTAGCTGCTAGC------------TAACTTTGTCTTTTTGCAAGCGGTGTGAGCAAGGGCGAGGAGGATAACATGGCCATCATCAAGGAGTTCATGCGCTTCAAGGTGCACATGGAGGGCTCCGTGAACGGC	ATGAGATTTCCTTCAATTTTTACTGCTGTTTTATTCGCAGCATCCTCCGCATTAGCTGCTAGCAAAAAAAAAAAAAAAGCAAGCGGTGTGAGCAAGGGCGAGGAGGATAACATGGCCATCATCAAGGAGTTCATGCGCTTCAAGGTGCACATGGAGGGCTCCGTGAACGGC
ATGAGATTTCCTTCAATTTTTACTGCTGTTTTATTCGCAGCATCCTCCGCATTAGCTGCTAGC------------TAACttttccagcccgCAAGCGGTGTGAGCAAGGGCGAGGAGGATAACATGGCCATCATCAAGGAGTTCATGCGCTTCAAGGTGCACATGGAGGGCTCCGTGAACGGC	1	35	Insertion and Deletion	0	0		22	MRFPSIFTAVLFAASSALAAS*											MRFPSIFTAVLFAASSALAASKKKKKASGVSKGEEDNMAIIKEFMRFKVHMEGSVNG	ATGAGATTTCCTTCAATTTTTACTGCTGTTTTATTCGCAGCATCCTCCGCATTAGCTGCTAGC------------TAACTTTTCCAGCCCGCAAGCGGTGTGAGCAAGGGCGAGGAGGATAACATGGCCATCATCAAGGAGTTCATGCGCTTCAAGGTGCACATGGAGGGCTCCGTGAACGGC	ATGAGATTTCCTTCAATTTTTACTGCTGTTTTATTCGCAGCATCCTCCGCATTAGCTGCTAGCAAAAAAAAAAAAAAAGCAAGCGGTGTGAGCAAGGGCGAGGAGGATAACATGGCCATCATCAAGGAGTTCATGCGCTTCAAGGTGCACATGGAGGGCTCCGTGAACGGC
ATGAGATTTCCTTCAATTTTTACTGCTGTTTTATTCGCAGCATCCTCCGCATTAGCTGCTAGC------------TAAGcattagttgtggCAAGCGGTGTGAGCAAGGGCGAGGAGGATAACATGGCCATCATCAAGGAGTTCATGCGCTTCAAGGTGCACATGGAGGGCTCCGTGAACGGC	1	36	Insertion and Deletion	0	0		22	MRFPSIFTAVLFAASSALAAS*											MRFPSIFTAVLFAASSALAASKKKKKASGVSKGEEDNMAIIKEFMRFKVHMEGSVNG	ATGAGATTTCCTTCAATTTTTACTGCTGTTTTATTCGCAGCATCCTCCGCATTAGCTGCTAGC------------TAAGCATTAGTTGTGGCAAGCGGTGTGAGCAAGGGCGAGGAGGATAACATGGCCATCATCAAGGAGTTCATGCGCTTCAAGGTGCACATGGAGGGCTCCGTGAACGGC	ATGAGATTTCCTTCAATTTTTACTGCTGTTTTATTCGCAGCATCCTCCGCATTAGCTGCTAGCAAAAAAAAAAAAAAAGCAAGCGGTGTGAGCAAGGGCGAGGAGGATAACATGGCCATCATCAAGGAGTTCATGCGCTTCAAGGTGCACATGGAGGGCTCCGTGAACGGC
ATGAGATTTCCTTCAATTTTTACTGCTGTTTTATTCGCAGCATCCTCCGCATTAGCTGCTAGC------------TAAGcctctgttggggCAAGCGGTGTGAGCAAGGGCGAGGATGATAACATGGCCATCATCAAGGAGTTCATGCGCTTCAAGGTGCACATGGAGGGCTCCGTGAACGGC	1	35	Insertion and Deletion	0	0		22	MRFPSIFTAVLFAASSALAAS*											MRFPSIFTAVLFAASSALAASKKKKKASGVSKGEEDNMAIIKEFMRFKVHMEGSVNG	ATGAGATTTCCTTCAATTTTTACTGCTGTTTTATTCGCAGCATCCTCCGCATTAGCTGCTAGC------------TAAGCCTCTGTTGGGGCAAGCGGTGTGAGCAAGGGCGAGGATGATAACATGGCCATCATCAAGGAGTTCATGCGCTTCAAGGTGCACATGGAGGGCTCCGTGAACGGC	ATGAGATTTCCTTCAATTTTTACTGCTGTTTTATTCGCAGCATCCTCCGCATTAGCTGCTAGCAAAAAAAAAAAAAAAGCAAGCGGTGTGAGCAAGGGCGAGGAGGATAACATGGCCATCATCAAGGAGTTCATGCGCTTCAAGGTGCACATGGAGGGCTCCGTGAACGGC
ATGAGATTTCCTTCAATTTTTACTGCTGTTTTATTCGCAGCATCCTCCGCATTAGCTGCTAGC------------TAAGcgacccttttgactgggCAAGCGGTGTGAGCAAGGGCGAGGAGGATAACATGGCCATCATCAAGGAGTTCATGCGCTTCAAGGTGCACATGGAGGGCTCCGTGAACGGC	1	36	Insertion and Deletion	0	5		22	MRFPSIFTAVLFAASSALAAS*											MRFPSIFTAVLFAASSALAASKKKKKASGVSKGEEDNMAIIKEFMRFKVHMEGSVNG	ATGAGATTTCCTTCAATTTTTACTGCTGTTTTATTCGCAGCATCCTCCGCATTAGCTGCTAGC------------TAAGCGACCCTTTTGACTGGGCAAGCGGTGTGAGCAAGGGCGAGGAGGATAACATGGCCATCATCAAGGAGTTCATGCGCTTCAAGGTGCACATGGAGGGCTCCGTGAACGGC	ATGAGATTTCCTTCAATTTTTACTGCTGTTTTATTCGCAGCATCCTCCGCATTAGCTGCTAGCAAAAAAAAAAAAAAAGCAAGCGGTGTGAGCAAGGGCGAGGAGGATAACATGGCCATCATCAAGGAGTTCATGCGCTTCAAGGTGCACATGGAGGGCTCCGTGAACGGC
ATGAGATTTCCTTCAATTTTTACTGCTGTTTTATTCGCAGCATCCTCCGCATTAGCTGCTAGC------------TAAGggagtggaggggCAAGCGGTGTGAGCAAGGGCGAGGAGGATAACATGGCCATCATCAAGGAGTTCATGGGCTTCAAGGTGCACATGGAGGGCTCCGTGAACGGC	1	30	Insertion and Deletion	0	0		22	MRFPSIFTAVLFAASSALAAS*											MRFPSIFTAVLFAASSALAASKKKKKASGVSKGEEDNMAIIKEFMRFKVHMEGSVNG	ATGAGATTTCCTTCAATTTTTACTGCTGTTTTATTCGCAGCATCCTCCGCATTAGCTGCTAGC------------TAAGGGAGTGGAGGGGCAAGCGGTGTGAGCAAGGGCGAGGAGGATAACATGGCCATCATCAAGGAGTTCATGGGCTTCAAGGTGCACATGGAGGGCTCCGTGAACGGC	ATGAGATTTCCTTCAATTTTTACTGCTGTTTTATTCGCAGCATCCTCCGCATTAGCTGCTAGCAAAAAAAAAAAAAAAGCAAGCGGTGTGAGCAAGGGCGAGGAGGATAACATGGCCATCATCAAGGAGTTCATGCGCTTCAAGGTGCACATGGAGGGCTCCGTGAACGGC
ATGAGATTTCCTTCAATTTTTACTGCTGTTTTATTCGCAGCATCCTCCGCATTAGCTGCTAGC------------TAAGggtgcccagttgCAAGCGGTGTGAGCAAGGGCGAGGAGGATAACATGGCCATCATCAAGGAGTTCATGCGCTTCAAGGTGCACATGGAGGGCTCCGTGAACGGC	1	36	Insertion and Deletion	0	0		22	MRFPSIFTAVLFAASSALAAS*											MRFPSIFTAVLFAASSALAASKKKKKASGVSKGEEDNMAIIKEFMRFKVHMEGSVNG	ATGAGATTTCCTTCAATTTTTACTGCTGTTTTATTCGCAGCATCCTCCGCATTAGCTGCTAGC------------TAAGGGTGCCCAGTTGCAAGCGGTGTGAGCAAGGGCGAGGAGGATAACATGGCCATCATCAAGGAGTTCATGCGCTTCAAGGTGCACATGGAGGGCTCCGTGAACGGC	ATGAGATTTCCTTCAATTTTTACTGCTGTTTTATTCGCAGCATCCTCCGCATTAGCTGCTAGCAAAAAAAAAAAAAAAGCAAGCGGTGTGAGCAAGGGCGAGGAGGATAACATGGCCATCATCAAGGAGTTCATGCGCTTCAAGGTGCACATGGAGGGCTCCGTGAACGGC
ATGAGATTTCCTTCAATTTTTACTGCTGTTTTATTCGCAGCATCCTCCGCATTAGCTGCTAGC------------TAAGggttttgctccgCAAGCGGTGTGAGCAAGGGCGAGGAGGATAACATGGCCATCATCAAGGAGTTCATGCGCTTCAAGGTGCACATGGAGGGCTCCGTGAACGGC	1	35	Insertion and Deletion	0	0		22	MRFPSIFTAVLFAASSALAAS*											MRFPSIFTAVLFAASSALAASKKKKKASGVSKGEEDNMAIIKEFMRFKVHMEGSVNG	ATGAGATTTCCTTCAATTTTTACTGCTGTTTTATTCGCAGCATCCTCCGCATTAGCTGCTAGC------------TAAGGGTTTTGCTCCGCAAGCGGTGTGAGCAAGGGCGAGGAGGATAACATGGCCATCATCAAGGAGTTCATGCGCTTCAAGGTGCACATGGAGGGCTCCGTGAACGGC	ATGAGATTTCCTTCAATTTTTACTGCTGTTTTATTCGCAGCATCCTCCGCATTAGCTGCTAGCAAAAAAAAAAAAAAAGCAAGCGGTGTGAGCAAGGGCGAGGAGGATAACATGGCCATCATCAAGGAGTTCATGCGCTTCAAGGTGCACATGGAGGGCTCCGTGAACGGC
ATGAGATTTCCTTCAATTTTTACTGCTGTTTTATTCGCAGCATCCTCCGCATTAGCTGCTAGC------------TAAGgttctgcagtggCAAGCGGTGTGAGCAAGGGCGAGGAGGATAACATGGCCATCATCAAGGAGTTCATGCGCTTCAAGGTGCACATGGAGGGCTCCGTGAACGGC	1	36	Insertion and Deletion	0	0		22	MRFPSIFTAVLFAASSALAAS*											MRFPSIFTAVLFAASSALAASKKKKKASGVSKGEEDNMAIIKEFMRFKVHMEGSVNG	ATGAGATTTCCTTCAATTTTTACTGCTGTTTTATTCGCAGCATCCTCCGCATTAGCTGCTAGC------------TAAGGTTCTGCAGTGGCAAGCGGTGTGAGCAAGGGCGAGGAGGATAACATGGCCATCATCAAGGAGTTCATGCGCTTCAAGGTGCACATGGAGGGCTCCGTGAACGGC	ATGAGATTTCCTTCAATTTTTACTGCTGTTTTATTCGCAGCATCCTCCGCATTAGCTGCTAGCAAAAAAAAAAAAAAAGCAAGCGGTGTGAGCAAGGGCGAGGAGGATAACATGGCCATCATCAAGGAGTTCATGCGCTTCAAGGTGCACATGGAGGGCTCCGTGAACGGC
ATGAGATTTCCTTCAATTTTTACTGCTGTTTTATTCGCAGCATCCTCCGCATTAGCTGCTAGC------------TAAGgttgtcacgctgCAAGCGGTGTGAGCAAGGGCGAGGAGGATAACATGGCCATCATCAAGGAGTTCATGCGCTTCAAGGTGCACATGGAGGGCTCCGTGAACGGC	1	36	Insertion and Deletion	0	0		22	MRFPSIFTAVLFAASSALAAS*											MRFPSIFTAVLFAASSALAASKKKKKASGVSKGEEDNMAIIKEFMRFKVHMEGSVNG	ATGAGATTTCCTTCAATTTTTACTGCTGTTTTATTCGCAGCATCCTCCGCATTAGCTGCTAGC------------TAAGGTTGTCACGCTGCAAGCGGTGTGAGCAAGGGCGAGGAGGATAACATGGCCATCATCAAGGAGTTCATGCGCTTCAAGGTGCACATGGAGGGCTCCGTGAACGGC	ATGAGATTTCCTTCAATTTTTACTGCTGTTTTATTCGCAGCATCCTCCGCATTAGCTGCTAGCAAAAAAAAAAAAAAAGCAAGCGGTGTGAGCAAGGGCGAGGAGGATAACATGGCCATCATCAAGGAGTTCATGCGCTTCAAGGTGCACATGGAGGGCTCCGTGAACGGC
ATGAGATTTCCTTCAATTTTTACTGCTGTTTTATTCGCAGCATCCTCCGCATTAGCTGCTAGC------------TAAGgttttgcgggggCAAGCGGTGTGAGCAAGGGCGAGGAGGATAACATGGCCATCATCAAGGAGTTCATGCGCTTCAAGGTGCACATGGAGGGCTCCGTGAACGGC	1	36	Insertion and Deletion	0	0		22	MRFPSIFTAVLFAASSALAAS*											MRFPSIFTAVLFAASSALAASKKKKKASGVSKGEEDNMAIIKEFMRFKVHMEGSVNG	ATGAGATTTCCTTCAATTTTTACTGCTGTTTTATTCGCAGCATCCTCCGCATTAGCTGCTAGC------------TAAGGTTTTGCGGGGGCAAGCGGTGTGAGCAAGGGCGAGGAGGATAACATGGCCATCATCAAGGAGTTCATGCGCTTCAAGGTGCACATGGAGGGCTCCGTGAACGGC	ATGAGATTTCCTTCAATTTTTACTGCTGTTTTATTCGCAGCATCCTCCGCATTAGCTGCTAGCAAAAAAAAAAAAAAAGCAAGCGGTGTGAGCAAGGGCGAGGAGGATAACATGGCCATCATCAAGGAGTTCATGCGCTTCAAGGTGCACATGGAGGGCTCCGTGAACGGC
ATGAGATTTCCTTCAATTTTTACTGCTGTTTTATTCGCAGCATCCTCCGCATTAGCTGCTAGC------------TAAGtcgcccctggggCAAGCGGTGTGAGCAAGGGCGAGGAGGATAACATGGCCATCATCAAGGAGTTCATGCGCTTCAAGGTGCACATGGAGGGCTCCGTGAACGGC	1	35	Insertion and Deletion	0	0		22	MRFPSIFTAVLFAASSALAAS*											MRFPSIFTAVLFAASSALAASKKKKKASGVSKGEEDNMAIIKEFMRFKVHMEGSVNG	ATGAGATTTCCTTCAATTTTTACTGCTGTTTTATTCGCAGCATCCTCCGCATTAGCTGCTAGC------------TAAGTCGCCCCTGGGGCAAGCGGTGTGAGCAAGGGCGAGGAGGATAACATGGCCATCATCAAGGAGTTCATGCGCTTCAAGGTGCACATGGAGGGCTCCGTGAACGGC	ATGAGATTTCCTTCAATTTTTACTGCTGTTTTATTCGCAGCATCCTCCGCATTAGCTGCTAGCAAAAAAAAAAAAAAAGCAAGCGGTGTGAGCAAGGGCGAGGAGGATAACATGGCCATCATCAAGGAGTTCATGCGCTTCAAGGTGCACATGGAGGGCTCCGTGAACGGC
ATGAGATTTCCTTCAATTTTTACTGCTGTTTTATTCGCAGCATCCTCCGCATTAGCTGCTAGC------------TAAGtcggttgatgtgCAAGCGGTGTGAGCAAGGGCGAGGAGGATAACATGGCCATCATCAAGGAGTTCATGCGCTTCAAGGTGCACATGGAGGGCTCCGTGAACGGC	1	36	Insertion and Deletion	0	0		22	MRFPSIFTAVLFAASSALAAS*											MRFPSIFTAVLFAASSALAASKKKKKASGVSKGEEDNMAIIKEFMRFKVHMEGSVNG	ATGAGATTTCCTTCAATTTTTACTGCTGTTTTATTCGCAGCATCCTCCGCATTAGCTGCTAGC------------TAAGTCGGTTGATGTGCAAGCGGTGTGAGCAAGGGCGAGGAGGATAACATGGCCATCATCAAGGAGTTCATGCGCTTCAAGGTGCACATGGAGGGCTCCGTGAACGGC	ATGAGATTTCCTTCAATTTTTACTGCTGTTTTATTCGCAGCATCCTCCGCATTAGCTGCTAGCAAAAAAAAAAAAAAAGCAAGCGGTGTGAGCAAGGGCGAGGAGGATAACATGGCCATCATCAAGGAGTTCATGCGCTTCAAGGTGCACATGGAGGGCTCCGTGAACGGC
ATGAGATTTCCTTCAATTTTTACTGCTGTTTTATTCGCAGCATCCTCCGCATTAGCTGCTAGC------------TAAGtcttagacggggCAAGCGGTGTGAGCAAGGGCGAGGAGGATAACATGGCCATCATCAAGGAGTTCATGCGCTTCAAGGTGCACATGGAGGGCTCCGTGAACGGC	1	36	Insertion and Deletion	0	0		22	MRFPSIFTAVLFAASSALAAS*											MRFPSIFTAVLFAASSALAASKKKKKASGVSKGEEDNMAIIKEFMRFKVHMEGSVNG	ATGAGATTTCCTTCAATTTTTACTGCTGTTTTATTCGCAGCATCCTCCGCATTAGCTGCTAGC------------TAAGTCTTAGACGGGGCAAGCGGTGTGAGCAAGGGCGAGGAGGATAACATGGCCATCATCAAGGAGTTCATGCGCTTCAAGGTGCACATGGAGGGCTCCGTGAACGGC	ATGAGATTTCCTTCAATTTTTACTGCTGTTTTATTCGCAGCATCCTCCGCATTAGCTGCTAGCAAAAAAAAAAAAAAAGCAAGCGGTGTGAGCAAGGGCGAGGAGGATAACATGGCCATCATCAAGGAGTTCATGCGCTTCAAGGTGCACATGGAGGGCTCCGTGAACGGC
ATGAGATTTCCTTCAATTTTTACTGCTGTTTTATTCGCAGCATCCTCCGCATTAGCTGCTAGC------------TAAGtcttgtgcgtcgCAAGCGGTGTGAGCAAGGGCGAGGAGGATAACATGGCCATCATCAAGGAGTTCATGCGCTTCAAGGTGCACATGGAGGGCTCCGTGAACGGC	1	33	Insertion and Deletion	0	0		22	MRFPSIFTAVLFAASSALAAS*											MRFPSIFTAVLFAASSALAASKKKKKASGVSKGEEDNMAIIKEFMRFKVHMEGSVNG	ATGAGATTTCCTTCAATTTTTACTGCTGTTTTATTCGCAGCATCCTCCGCATTAGCTGCTAGC------------TAAGTCTTGTGCGTCGCAAGCGGTGTGAGCAAGGGCGAGGAGGATAACATGGCCATCATCAAGGAGTTCATGCGCTTCAAGGTGCACATGGAGGGCTCCGTGAACGGC	ATGAGATTTCCTTCAATTTTTACTGCTGTTTTATTCGCAGCATCCTCCGCATTAGCTGCTAGCAAAAAAAAAAAAAAAGCAAGCGGTGTGAGCAAGGGCGAGGAGGATAACATGGCCATCATCAAGGAGTTCATGCGCTTCAAGGTGCACATGGAGGGCTCCGTGAACGGC
ATGAGATTTCCTTCAATTTTTACTGCTGTTTTATTCGCAGCATCCTCCGCATTAGCTGCTAGC------------TAAGtggttgtagcggCAAGCGGTGTGAGCAAGGGCGAGGAGGATAACATGGCCATCATCAAGGAGTTCATGCGCTTCAAGGTGCACATGGAGGGCTCCGTGAACGGC	1	36	Insertion and Deletion	0	0		22	MRFPSIFTAVLFAASSALAAS*											MRFPSIFTAVLFAASSALAASKKKKKASGVSKGEEDNMAIIKEFMRFKVHMEGSVNG	ATGAGATTTCCTTCAATTTTTACTGCTGTTTTATTCGCAGCATCCTCCGCATTAGCTGCTAGC------------TAAGTGGTTGTAGCGGCAAGCGGTGTGAGCAAGGGCGAGGAGGATAACATGGCCATCATCAAGGAGTTCATGCGCTTCAAGGTGCACATGGAGGGCTCCGTGAACGGC	ATGAGATTTCCTTCAATTTTTACTGCTGTTTTATTCGCAGCATCCTCCGCATTAGCTGCTAGCAAAAAAAAAAAAAAAGCAAGCGGTGTGAGCAAGGGCGAGGAGGATAACATGGCCATCATCAAGGAGTTCATGCGCTTCAAGGTGCACATGGAGGGCTCCGTGAACGGC
ATGAGATTTCCTTCAATTTTTACTGCTGTTTTATTCGCAGCATCCTCCGCATTAGCTGCTAGC------------TAAGtgtcgcgtctggCAAGCGGTGTGAGCAAGGGCGAGGAGGATAACATGGCCATCATCAAGGAGTTCATGCGCTTCAAGGTGCACATGGAGGGCTCCGTGAACGGC	1	36	Insertion and Deletion	0	0		22	MRFPSIFTAVLFAASSALAAS*											MRFPSIFTAVLFAASSALAASKKKKKASGVSKGEEDNMAIIKEFMRFKVHMEGSVNG	ATGAGATTTCCTTCAATTTTTACTGCTGTTTTATTCGCAGCATCCTCCGCATTAGCTGCTAGC------------TAAGTGTCGCGTCTGGCAAGCGGTGTGAGCAAGGGCGAGGAGGATAACATGGCCATCATCAAGGAGTTCATGCGCTTCAAGGTGCACATGGAGGGCTCCGTGAACGGC	ATGAGATTTCCTTCAATTTTTACTGCTGTTTTATTCGCAGCATCCTCCGCATTAGCTGCTAGCAAAAAAAAAAAAAAAGCAAGCGGTGTGAGCAAGGGCGAGGAGGATAACATGGCCATCATCAAGGAGTTCATGCGCTTCAAGGTGCACATGGAGGGCTCCGTGAACGGC
ATGAGATTTCCTTCAATTTTTACTGCTGTTTTATTCGCAGCATCCTCCGCATTAGCTGCTAGC------------TAAGtgtgtgtattcgCAAGCGGTGTGAGCAAGGGCGAGGAGGATAACATGGCCATCATCAAGGAGTTCATGCGCTTCAAGGTGCACATGGAGGGCTCCGTGAACGGC	1	36	Insertion and Deletion	0	0		22	MRFPSIFTAVLFAASSALAAS*											MRFPSIFTAVLFAASSALAASKKKKKASGVSKGEEDNMAIIKEFMRFKVHMEGSVNG	ATGAGATTTCCTTCAATTTTTACTGCTGTTTTATTCGCAGCATCCTCCGCATTAGCTGCTAGC------------TAAGTGTGTGTATTCGCAAGCGGTGTGAGCAAGGGCGAGGAGGATAACATGGCCATCATCAAGGAGTTCATGCGCTTCAAGGTGCACATGGAGGGCTCCGTGAACGGC	ATGAGATTTCCTTCAATTTTTACTGCTGTTTTATTCGCAGCATCCTCCGCATTAGCTGCTAGCAAAAAAAAAAAAAAAGCAAGCGGTGTGAGCAAGGGCGAGGAGGATAACATGGCCATCATCAAGGAGTTCATGCGCTTCAAGGTGCACATGGAGGGCTCCGTGAACGGC
ATGAGATTTCCTTCAATTTTTACTGCTGTTTTATTCGCAGCATCCTCCGCATTAGCTGCTAGC------------TAAGtgtttttggtggCAAGCGGTGTGAGCAAGGGCGAGGAGGATAACATGGCCATCATCAAGGAGTTCATGCGCTTCAAGGTGCACATGGAGGGCTCCGTGAACGGC	1	34	Insertion and Deletion	0	0		22	MRFPSIFTAVLFAASSALAAS*											MRFPSIFTAVLFAASSALAASKKKKKASGVSKGEEDNMAIIKEFMRFKVHMEGSVNG	ATGAGATTTCCTTCAATTTTTACTGCTGTTTTATTCGCAGCATCCTCCGCATTAGCTGCTAGC------------TAAGTGTTTTTGGTGGCAAGCGGTGTGAGCAAGGGCGAGGAGGATAACATGGCCATCATCAAGGAGTTCATGCGCTTCAAGGTGCACATGGAGGGCTCCGTGAACGGC	ATGAGATTTCCTTCAATTTTTACTGCTGTTTTATTCGCAGCATCCTCCGCATTAGCTGCTAGCAAAAAAAAAAAAAAAGCAAGCGGTGTGAGCAAGGGCGAGGAGGATAACATGGCCATCATCAAGGAGTTCATGCGCTTCAAGGTGCACATGGAGGGCTCCGTGAACGGC
ATGAGATTTCCTTCAATTTTTACTGCTGTTTTATTCGCAGCATCCTCCGCATTAGCTGCTAGC------------TAATccttatatcttgCAAGCGGTGTGAGCAAGGGCGAGGAGGATAACATGGCCATCATCAAGGAGTTCATGCGCTTCAAGGTGCACATGGAGGGCTCCGTGAACGGC	1	35	Insertion and Deletion	0	0		22	MRFPSIFTAVLFAASSALAAS*											MRFPSIFTAVLFAASSALAASKKKKKASGVSKGEEDNMAIIKEFMRFKVHMEGSVNG	ATGAGATTTCCTTCAATTTTTACTGCTGTTTTATTCGCAGCATCCTCCGCATTAGCTGCTAGC------------TAATCCTTATATCTTGCAAGCGGTGTGAGCAAGGGCGAGGAGGATAACATGGCCATCATCAAGGAGTTCATGCGCTTCAAGGTGCACATGGAGGGCTCCGTGAACGGC	ATGAGATTTCCTTCAATTTTTACTGCTGTTTTATTCGCAGCATCCTCCGCATTAGCTGCTAGCAAAAAAAAAAAAAAAGCAAGCGGTGTGAGCAAGGGCGAGGAGGATAACATGGCCATCATCAAGGAGTTCATGCGCTTCAAGGTGCACATGGAGGGCTCCGTGAACGGC
ATGAGATTTCCTTCAATTTTTACTGCTGTTTTATTCGCAGCATCCTCCGCATTAGCTGCTAGC------------TAATcggaccgtcgtgCAAGCGGTGTGAGCAAGGGCGAGGAGGATAACATGGCCATCATCAAGGAGTTCATGCGCTTCAAGGTGCACATGGAGGGCTCCGTGAACGGC	1	34	Insertion and Deletion	0	0		22	MRFPSIFTAVLFAASSALAAS*											MRFPSIFTAVLFAASSALAASKKKKKASGVSKGEEDNMAIIKEFMRFKVHMEGSVNG	ATGAGATTTCCTTCAATTTTTACTGCTGTTTTATTCGCAGCATCCTCCGCATTAGCTGCTAGC------------TAATCGGACCGTCGTGCAAGCGGTGTGAGCAAGGGCGAGGAGGATAACATGGCCATCATCAAGGAGTTCATGCGCTTCAAGGTGCACATGGAGGGCTCCGTGAACGGC	ATGAGATTTCCTTCAATTTTTACTGCTGTTTTATTCGCAGCATCCTCCGCATTAGCTGCTAGCAAAAAAAAAAAAAAAGCAAGCGGTGTGAGCAAGGGCGAGGAGGATAACATGGCCATCATCAAGGAGTTCATGCGCTTCAAGGTGCACATGGAGGGCTCCGTGAACGGC
ATGAGATTTCCTTCAATTTTTACTGCTGTTTTATTCGCAGCATCCTCCGCATTAGCTGCTAGC------------TAATctagcctatgggCAAGCGGTGTGAGCAAGGGCGAGGAGGATAACATGGCCATCATCAAGGAGTTCATGCGCTTCAAGGTGCACATGGAGGGCTCCGTGAACGGC	1	32	Insertion and Deletion	0	0		22	MRFPSIFTAVLFAASSALAAS*											MRFPSIFTAVLFAASSALAASKKKKKASGVSKGEEDNMAIIKEFMRFKVHMEGSVNG	ATGAGATTTCCTTCAATTTTTACTGCTGTTTTATTCGCAGCATCCTCCGCATTAGCTGCTAGC------------TAATCTAGCCTATGGGCAAGCGGTGTGAGCAAGGGCGAGGAGGATAACATGGCCATCATCAAGGAGTTCATGCGCTTCAAGGTGCACATGGAGGGCTCCGTGAACGGC	ATGAGATTTCCTTCAATTTTTACTGCTGTTTTATTCGCAGCATCCTCCGCATTAGCTGCTAGCAAAAAAAAAAAAAAAGCAAGCGGTGTGAGCAAGGGCGAGGAGGATAACATGGCCATCATCAAGGAGTTCATGCGCTTCAAGGTGCACATGGAGGGCTCCGTGAACGGC
ATGAGATTTCCTTCAATTTTTACTGCTGTTTTATTCGCAGCATCCTCCGCATTAGCTGCTAGC------------TAATctattttgtctgCAAGCGGTGTGAGCAAGGGCGAGGAGGATAACATGGCCATCATCAAGGAGTTCATGCGCTTCAAGGTGCACATGGAGGGCTCCGTGAACGGC	1	36	Insertion and Deletion	0	0		22	MRFPSIFTAVLFAASSALAAS*											MRFPSIFTAVLFAASSALAASKKKKKASGVSKGEEDNMAIIKEFMRFKVHMEGSVNG	ATGAGATTTCCTTCAATTTTTACTGCTGTTTTATTCGCAGCATCCTCCGCATTAGCTGCTAGC------------TAATCTATTTTGTCTGCAAGCGGTGTGAGCAAGGGCGAGGAGGATAACATGGCCATCATCAAGGAGTTCATGCGCTTCAAGGTGCACATGGAGGGCTCCGTGAACGGC	ATGAGATTTCCTTCAATTTTTACTGCTGTTTTATTCGCAGCATCCTCCGCATTAGCTGCTAGCAAAAAAAAAAAAAAAGCAAGCGGTGTGAGCAAGGGCGAGGAGGATAACATGGCCATCATCAAGGAGTTCATGCGCTTCAAGGTGCACATGGAGGGCTCCGTGAACGGC
ATGAGATTTCCTTCAATTTTTACTGCTGTTTTATTCGCAGCATCCTCCGCATTAGCTGCTAGC------------TAATcttttttttcggCAAGCGGTGTGAGCAAGGGCGAGGAGGATAACATGGCCATCATCAAGGAGTTCATGCGCTTCAAGGTGCACATGGAGGGCTCCGTGAACGGC	1	36	Insertion and Deletion	0	0		22	MRFPSIFTAVLFAASSALAAS*											MRFPSIFTAVLFAASSALAASKKKKKASGVSKGEEDNMAIIKEFMRFKVHMEGSVNG	ATGAGATTTCCTTCAATTTTTACTGCTGTTTTATTCGCAGCATCCTCCGCATTAGCTGCTAGC------------TAATCTTTTTTTTCGGCAAGCGGTGTGAGCAAGGGCGAGGAGGATAACATGGCCATCATCAAGGAGTTCATGCGCTTCAAGGTGCACATGGAGGGCTCCGTGAACGGC	ATGAGATTTCCTTCAATTTTTACTGCTGTTTTATTCGCAGCATCCTCCGCATTAGCTGCTAGCAAAAAAAAAAAAAAAGCAAGCGGTGTGAGCAAGGGCGAGGAGGATAACATGGCCATCATCAAGGAGTTCATGCGCTTCAAGGTGCACATGGAGGGCTCCGTGAACGGC
ATGAGATTTCCTTCAATTTTTACTGCTGTTTTATTCGCAGCATCCTCCGCATTAGCTGCTAGC------------TAATgatttgctcttgCAAGCGGTGTGAGCAAGGGCGAGGAGGATAACATGGCCATCATCAAGGAGTTCATGCGCTTCAAGGTGCACATGGAGGGCTCCGTGAACGGC	1	36	Insertion and Deletion	0	0		22	MRFPSIFTAVLFAASSALAAS*											MRFPSIFTAVLFAASSALAASKKKKKASGVSKGEEDNMAIIKEFMRFKVHMEGSVNG	ATGAGATTTCCTTCAATTTTTACTGCTGTTTTATTCGCAGCATCCTCCGCATTAGCTGCTAGC------------TAATGATTTGCTCTTGCAAGCGGTGTGAGCAAGGGCGAGGAGGATAACATGGCCATCATCAAGGAGTTCATGCGCTTCAAGGTGCACATGGAGGGCTCCGTGAACGGC	ATGAGATTTCCTTCAATTTTTACTGCTGTTTTATTCGCAGCATCCTCCGCATTAGCTGCTAGCAAAAAAAAAAAAAAAGCAAGCGGTGTGAGCAAGGGCGAGGAGGATAACATGGCCATCATCAAGGAGTTCATGCGCTTCAAGGTGCACATGGAGGGCTCCGTGAACGGC
ATGAGATTTCCTTCAATTTTTACTGCTGTTTTATTCGCAGCATCCTCCGCATTAGCTGCTAGC------------TAATgcccgcttgttgCAAGCGGTGTGAGCAAGGGCGAGGAGGATAACATGGCCATCATCAAGGAGTTCATGCGCTTCAAGGTGCACATGGAGGGCTCCGTGAACGGC	1	32	Insertion and Deletion	0	0		22	MRFPSIFTAVLFAASSALAAS*											MRFPSIFTAVLFAASSALAASKKKKKASGVSKGEEDNMAIIKEFMRFKVHMEGSVNG	ATGAGATTTCCTTCAATTTTTACTGCTGTTTTATTCGCAGCATCCTCCGCATTAGCTGCTAGC------------TAATGCCCGCTTGTTGCAAGCGGTGTGAGCAAGGGCGAGGAGGATAACATGGCCATCATCAAGGAGTTCATGCGCTTCAAGGTGCACATGGAGGGCTCCGTGAACGGC	ATGAGATTTCCTTCAATTTTTACTGCTGTTTTATTCGCAGCATCCTCCGCATTAGCTGCTAGCAAAAAAAAAAAAAAAGCAAGCGGTGTGAGCAAGGGCGAGGAGGATAACATGGCCATCATCAAGGAGTTCATGCGCTTCAAGGTGCACATGGAGGGCTCCGTGAACGGC
ATGAGATTTCCTTCAATTTTTACTGCTGTTTTATTCGCAGCATCCTCCGCATTAGCTGCTAGC------------TAATggattggtggggCAAGCGGTGTGAGCAAGGGCGAGGAGGATAACATGGCCATCATCAAGGAGTTCATGCGCTTCAAGGTGCACATGGAGGGCTCCGTGAACGGC	1	35	Insertion and Deletion	0	0		22	MRFPSIFTAVLFAASSALAAS*											MRFPSIFTAVLFAASSALAASKKKKKASGVSKGEEDNMAIIKEFMRFKVHMEGSVNG	ATGAGATTTCCTTCAATTTTTACTGCTGTTTTATTCGCAGCATCCTCCGCATTAGCTGCTAGC------------TAATGGATTGGTGGGGCAAGCGGTGTGAGCAAGGGCGAGGAGGATAACATGGCCATCATCAAGGAGTTCATGCGCTTCAAGGTGCACATGGAGGGCTCCGTGAACGGC	ATGAGATTTCCTTCAATTTTTACTGCTGTTTTATTCGCAGCATCCTCCGCATTAGCTGCTAGCAAAAAAAAAAAAAAAGCAAGCGGTGTGAGCAAGGGCGAGGAGGATAACATGGCCATCATCAAGGAGTTCATGCGCTTCAAGGTGCACATGGAGGGCTCCGTGAACGGC
ATGAGATTTCCTTCAATTTTTACTGCTGTTTTATTCGCAGCATCCTCCGCATTAGCTGCTAGC------------TAATgtagcgagcgcgCAAGCGGTGTGAGCAAGGGCGAGGAGGATAACATGGCCATCATCAAGGAGTTCATGCGCTTCAAGGTGCACATGGAGGGCTCCGTGAACGGC	1	31	Insertion and Deletion	0	0		22	MRFPSIFTAVLFAASSALAAS*											MRFPSIFTAVLFAASSALAASKKKKKASGVSKGEEDNMAIIKEFMRFKVHMEGSVNG	ATGAGATTTCCTTCAATTTTTACTGCTGTTTTATTCGCAGCATCCTCCGCATTAGCTGCTAGC------------TAATGTAGCGAGCGCGCAAGCGGTGTGAGCAAGGGCGAGGAGGATAACATGGCCATCATCAAGGAGTTCATGCGCTTCAAGGTGCACATGGAGGGCTCCGTGAACGGC	ATGAGATTTCCTTCAATTTTTACTGCTGTTTTATTCGCAGCATCCTCCGCATTAGCTGCTAGCAAAAAAAAAAAAAAAGCAAGCGGTGTGAGCAAGGGCGAGGAGGATAACATGGCCATCATCAAGGAGTTCATGCGCTTCAAGGTGCACATGGAGGGCTCCGTGAACGGC
ATGAGATTTCCTTCAATTTTTACTGCTGTTTTATTCGCAGCATCCTCCGCATTAGCTGCTAGC------------TAATgtagtcgtcccgCAAGCGGTGTGAGCAAGGGCGAGGAGGATAACATGGCCATCATCAAGGAGTTCATGCGCTTCAAGGTGCACATGGAGGGCTCCGTGAACGGC	1	35	Insertion and Deletion	0	0		22	MRFPSIFTAVLFAASSALAAS*											MRFPSIFTAVLFAASSALAASKKKKKASGVSKGEEDNMAIIKEFMRFKVHMEGSVNG	ATGAGATTTCCTTCAATTTTTACTGCTGTTTTATTCGCAGCATCCTCCGCATTAGCTGCTAGC------------TAATGTAGTCGTCCCGCAAGCGGTGTGAGCAAGGGCGAGGAGGATAACATGGCCATCATCAAGGAGTTCATGCGCTTCAAGGTGCACATGGAGGGCTCCGTGAACGGC	ATGAGATTTCCTTCAATTTTTACTGCTGTTTTATTCGCAGCATCCTCCGCATTAGCTGCTAGCAAAAAAAAAAAAAAAGCAAGCGGTGTGAGCAAGGGCGAGGAGGATAACATGGCCATCATCAAGGAGTTCATGCGCTTCAAGGTGCACATGGAGGGCTCCGTGAACGGC
ATGAGATTTCCTTCAATTTTTACTGCTGTTTTATTCGCAGCATCCTCCGCATTAGCTGCTAGC------------TAATtacccccctccgCAAGCGGTGTGAGCAAGGGCGAGGAGGAGAACATGGCCATCATCAAGGAGTTCATGCGCTTCAAGGTGCACATGGAGGGCTCCGTGAACGGC	1	25	Insertion and Deletion	0	0		22	MRFPSIFTAVLFAASSALAAS*											MRFPSIFTAVLFAASSALAASKKKKKASGVSKGEEDNMAIIKEFMRFKVHMEGSVNG	ATGAGATTTCCTTCAATTTTTACTGCTGTTTTATTCGCAGCATCCTCCGCATTAGCTGCTAGC------------TAATTACCCCCCTCCGCAAGCGGTGTGAGCAAGGGCGAGGAGGAGAACATGGCCATCATCAAGGAGTTCATGCGCTTCAAGGTGCACATGGAGGGCTCCGTGAACGGC	ATGAGATTTCCTTCAATTTTTACTGCTGTTTTATTCGCAGCATCCTCCGCATTAGCTGCTAGCAAAAAAAAAAAAAAAGCAAGCGGTGTGAGCAAGGGCGAGGAGGATAACATGGCCATCATCAAGGAGTTCATGCGCTTCAAGGTGCACATGGAGGGCTCCGTGAACGGC
ATGAGATTTCCTTCAATTTTTACTGCTGTTTTATTCGCAGCATCCTCCGCATTAGCTGCTAGC------------TAATtacgagtgtgtgCAAGCGGTGTGAGCAAGGGCGAGGAGGATAACATGGCCATCATCAAGGAGTTCATGCGCTTCAAGGTGCACATGGAGGGCTCCGTGAACGGC	1	35	Insertion and Deletion	0	0		22	MRFPSIFTAVLFAASSALAAS*											MRFPSIFTAVLFAASSALAASKKKKKASGVSKGEEDNMAIIKEFMRFKVHMEGSVNG	ATGAGATTTCCTTCAATTTTTACTGCTGTTTTATTCGCAGCATCCTCCGCATTAGCTGCTAGC------------TAATTACGAGTGTGTGCAAGCGGTGTGAGCAAGGGCGAGGAGGATAACATGGCCATCATCAAGGAGTTCATGCGCTTCAAGGTGCACATGGAGGGCTCCGTGAACGGC	ATGAGATTTCCTTCAATTTTTACTGCTGTTTTATTCGCAGCATCCTCCGCATTAGCTGCTAGCAAAAAAAAAAAAAAAGCAAGCGGTGTGAGCAAGGGCGAGGAGGATAACATGGCCATCATCAAGGAGTTCATGCGCTTCAAGGTGCACATGGAGGGCTCCGTGAACGGC
ATGAGATTTCCTTCAATTTTTACTGCTGTTTTATTCGCAGCATCCTCCGCATTAGCTGCTAGC------------TAATtacggtatgttgCAAGCGGTGTGAGCAAGGGCGAGGAGGATAACATGGCCATCATCAAGGAGTTCATGCGCTTCAAGGTGCACATGGAGGGCTCCGTGAACGGC	1	35	Insertion and Deletion	0	0		22	MRFPSIFTAVLFAASSALAAS*											MRFPSIFTAVLFAASSALAASKKKKKASGVSKGEEDNMAIIKEFMRFKVHMEGSVNG	ATGAGATTTCCTTCAATTTTTACTGCTGTTTTATTCGCAGCATCCTCCGCATTAGCTGCTAGC------------TAATTACGGTATGTTGCAAGCGGTGTGAGCAAGGGCGAGGAGGATAACATGGCCATCATCAAGGAGTTCATGCGCTTCAAGGTGCACATGGAGGGCTCCGTGAACGGC	ATGAGATTTCCTTCAATTTTTACTGCTGTTTTATTCGCAGCATCCTCCGCATTAGCTGCTAGCAAAAAAAAAAAAAAAGCAAGCGGTGTGAGCAAGGGCGAGGAGGATAACATGGCCATCATCAAGGAGTTCATGCGCTTCAAGGTGCACATGGAGGGCTCCGTGAACGGC
ATGAGATTTCCTTCAATTTTTACTGCTGTTTTATTCGCAGCATCCTCCGCATTAGCTGCTAGC------------TAATtaggggcatttgCAAGCGGTGTGAGCAAGGGCGAGGAGGATAACATGGCCATCATCAAGGAGTTCATGCGCTTCAAGGTGCACATGGAGGGCTCCGTGAACGGC	1	35	Insertion and Deletion	0	0		22	MRFPSIFTAVLFAASSALAAS*											MRFPSIFTAVLFAASSALAASKKKKKASGVSKGEEDNMAIIKEFMRFKVHMEGSVNG	ATGAGATTTCCTTCAATTTTTACTGCTGTTTTATTCGCAGCATCCTCCGCATTAGCTGCTAGC------------TAATTAGGGGCATTTGCAAGCGGTGTGAGCAAGGGCGAGGAGGATAACATGGCCATCATCAAGGAGTTCATGCGCTTCAAGGTGCACATGGAGGGCTCCGTGAACGGC	ATGAGATTTCCTTCAATTTTTACTGCTGTTTTATTCGCAGCATCCTCCGCATTAGCTGCTAGCAAAAAAAAAAAAAAAGCAAGCGGTGTGAGCAAGGGCGAGGAGGATAACATGGCCATCATCAAGGAGTTCATGCGCTTCAAGGTGCACATGGAGGGCTCCGTGAACGGC
ATGAGATTTCCTTCAATTTTTACTGCTGTTTTATTCGCAGCATCCTCCGCATTAGCTGCTAGC------------TAATtatctggatgggCAAGCGGTGTGAGCAAGGGCGAGGAGGATAACATGGCCATCATCAAGGAGTTCATGCGCTTCAAGGTGCACATGGAGGGCTCCGTGAACGGC	1	29	Insertion and Deletion	0	0		22	MRFPSIFTAVLFAASSALAAS*											MRFPSIFTAVLFAASSALAASKKKKKASGVSKGEEDNMAIIKEFMRFKVHMEGSVNG	ATGAGATTTCCTTCAATTTTTACTGCTGTTTTATTCGCAGCATCCTCCGCATTAGCTGCTAGC------------TAATTATCTGGATGGGCAAGCGGTGTGAGCAAGGGCGAGGAGGATAACATGGCCATCATCAAGGAGTTCATGCGCTTCAAGGTGCACATGGAGGGCTCCGTGAACGGC	ATGAGATTTCCTTCAATTTTTACTGCTGTTTTATTCGCAGCATCCTCCGCATTAGCTGCTAGCAAAAAAAAAAAAAAAGCAAGCGGTGTGAGCAAGGGCGAGGAGGATAACATGGCCATCATCAAGGAGTTCATGCGCTTCAAGGTGCACATGGAGGGCTCCGTGAACGGC
ATGAGATTTCCTTCAATTTTTACTGCTGTTTTATTCGCAGCATCCTCCGCATTAGCTGCTAGC------------TAATtcccattacttgCAAGCGGTGTGAGCAAGGGCGAGGAGGATAACATGGCCATCATCAAGGAGTTCATGCGCTTCAAGGTGCACATGGAGGGCTCCGTGAACGGC	1	34	Insertion and Deletion	0	0		22	MRFPSIFTAVLFAASSALAAS*											MRFPSIFTAVLFAASSALAASKKKKKASGVSKGEEDNMAIIKEFMRFKVHMEGSVNG	ATGAGATTTCCTTCAATTTTTACTGCTGTTTTATTCGCAGCATCCTCCGCATTAGCTGCTAGC------------TAATTCCCATTACTTGCAAGCGGTGTGAGCAAGGGCGAGGAGGATAACATGGCCATCATCAAGGAGTTCATGCGCTTCAAGGTGCACATGGAGGGCTCCGTGAACGGC	ATGAGATTTCCTTCAATTTTTACTGCTGTTTTATTCGCAGCATCCTCCGCATTAGCTGCTAGCAAAAAAAAAAAAAAAGCAAGCGGTGTGAGCAAGGGCGAGGAGGATAACATGGCCATCATCAAGGAGTTCATGCGCTTCAAGGTGCACATGGAGGGCTCCGTGAACGGC
ATGAGATTTCCTTCAATTTTTACTGCTGTTTTATTCGCAGCATCCTCCGCATTAGCTGCTAGC------------TAATtcgttttcgctgCAAGCGGTGTGAGCAAGGGCGAGGAGGATAACATGGCCATCATCAAGGAGTTCATGCGCTTCAAGGTGCACATGGAGGGCTCCGTGAACGGC	1	35	Insertion and Deletion	0	0		22	MRFPSIFTAVLFAASSALAAS*											MRFPSIFTAVLFAASSALAASKKKKKASGVSKGEEDNMAIIKEFMRFKVHMEGSVNG	ATGAGATTTCCTTCAATTTTTACTGCTGTTTTATTCGCAGCATCCTCCGCATTAGCTGCTAGC------------TAATTCGTTTTCGCTGCAAGCGGTGTGAGCAAGGGCGAGGAGGATAACATGGCCATCATCAAGGAGTTCATGCGCTTCAAGGTGCACATGGAGGGCTCCGTGAACGGC	ATGAGATTTCCTTCAATTTTTACTGCTGTTTTATTCGCAGCATCCTCCGCATTAGCTGCTAGCAAAAAAAAAAAAAAAGCAAGCGGTGTGAGCAAGGGCGAGGAGGATAACATGGCCATCATCAAGGAGTTCATGCGCTTCAAGGTGCACATGGAGGGCTCCGTGAACGGC
ATGAGATTTCCTTCAATTTTTACTGCTGTTTTATTCGCAGCATCCTCCGCATTAGCTGCTAGC------------TAATtctataccctggCAAGCGGTGTGAGCAAGGGCGAGGAGGATAACATGGCCATCATCAAGGAGTTCATGCGCTTCAAGGTGCACATGGAGGGCTCCGTGAACGGC	1	35	Insertion and Deletion	0	0		22	MRFPSIFTAVLFAASSALAAS*											MRFPSIFTAVLFAASSALAASKKKKKASGVSKGEEDNMAIIKEFMRFKVHMEGSVNG	ATGAGATTTCCTTCAATTTTTACTGCTGTTTTATTCGCAGCATCCTCCGCATTAGCTGCTAGC------------TAATTCTATACCCTGGCAAGCGGTGTGAGCAAGGGCGAGGAGGATAACATGGCCATCATCAAGGAGTTCATGCGCTTCAAGGTGCACATGGAGGGCTCCGTGAACGGC	ATGAGATTTCCTTCAATTTTTACTGCTGTTTTATTCGCAGCATCCTCCGCATTAGCTGCTAGCAAAAAAAAAAAAAAAGCAAGCGGTGTGAGCAAGGGCGAGGAGGATAACATGGCCATCATCAAGGAGTTCATGCGCTTCAAGGTGCACATGGAGGGCTCCGTGAACGGC
ATGAGATTTCCTTCAATTTTTACTGCTGTTTTATTCGCAGCATCCTCCGCATTAGCTGCTAGC------------TAATtggatatttttgCAAGCGGTGTGAGCAAGGGCGAGGAGGATAACATGGCCATCATCAAGGAGTTCATGCGCTTCAAGGTGCACATGGAGGGCTCCGTGAACGGC	1	36	Insertion and Deletion	0	0		22	MRFPSIFTAVLFAASSALAAS*											MRFPSIFTAVLFAASSALAASKKKKKASGVSKGEEDNMAIIKEFMRFKVHMEGSVNG	ATGAGATTTCCTTCAATTTTTACTGCTGTTTTATTCGCAGCATCCTCCGCATTAGCTGCTAGC------------TAATTGGATATTTTTGCAAGCGGTGTGAGCAAGGGCGAGGAGGATAACATGGCCATCATCAAGGAGTTCATGCGCTTCAAGGTGCACATGGAGGGCTCCGTGAACGGC	ATGAGATTTCCTTCAATTTTTACTGCTGTTTTATTCGCAGCATCCTCCGCATTAGCTGCTAGCAAAAAAAAAAAAAAAGCAAGCGGTGTGAGCAAGGGCGAGGAGGATAACATGGCCATCATCAAGGAGTTCATGCGCTTCAAGGTGCACATGGAGGGCTCCGTGAACGGC
ATGAGATTTCCTTCAATTTTTACTGCTGTTTTATTCGCAGCATCCTCCGCATTAGCTGCTAGC------------TAATtggcgctcgctgCAAGCGGTGTGAGCAAGGGCGAGGAGGATAACATGGCCATCATCAAGGAGTTCATGCGCTTCAAGGTGCACATGGAGGGCTCCGTGAACGGC	1	35	Insertion and Deletion	0	0		22	MRFPSIFTAVLFAASSALAAS*											MRFPSIFTAVLFAASSALAASKKKKKASGVSKGEEDNMAIIKEFMRFKVHMEGSVNG	ATGAGATTTCCTTCAATTTTTACTGCTGTTTTATTCGCAGCATCCTCCGCATTAGCTGCTAGC------------TAATTGGCGCTCGCTGCAAGCGGTGTGAGCAAGGGCGAGGAGGATAACATGGCCATCATCAAGGAGTTCATGCGCTTCAAGGTGCACATGGAGGGCTCCGTGAACGGC	ATGAGATTTCCTTCAATTTTTACTGCTGTTTTATTCGCAGCATCCTCCGCATTAGCTGCTAGCAAAAAAAAAAAAAAAGCAAGCGGTGTGAGCAAGGGCGAGGAGGATAACATGGCCATCATCAAGGAGTTCATGCGCTTCAAGGTGCACATGGAGGGCTCCGTGAACGGC
ATGAGATTTCCTTCAATTTTTACTGCTGTTTTATTCGCAGCATCCTCCGCATTAGCTGCTAGC------------TAATtgtctggccctgCACGCGGTGTGAGCAAGGGCGAGGAGGATAACATGGCCATCATCAAGGAGTTCATGCGCTTCAAGGTGCACATGGAGGGCTTCGTGAACGGC	1	32	Insertion and Deletion	0	0		22	MRFPSIFTAVLFAASSALAAS*											MRFPSIFTAVLFAASSALAASKKKKKASGVSKGEEDNMAIIKEFMRFKVHMEGSVNG	ATGAGATTTCCTTCAATTTTTACTGCTGTTTTATTCGCAGCATCCTCCGCATTAGCTGCTAGC------------TAATTGTCTGGCCCTGCACGCGGTGTGAGCAAGGGCGAGGAGGATAACATGGCCATCATCAAGGAGTTCATGCGCTTCAAGGTGCACATGGAGGGCTTCGTGAACGGC	ATGAGATTTCCTTCAATTTTTACTGCTGTTTTATTCGCAGCATCCTCCGCATTAGCTGCTAGCAAAAAAAAAAAAAAAGCAAGCGGTGTGAGCAAGGGCGAGGAGGATAACATGGCCATCATCAAGGAGTTCATGCGCTTCAAGGTGCACATGGAGGGCTCCGTGAACGGC
ATGAGATTTCCTTCAATTTTTACTGCTGTTTTATTCGCAGCATCCTCCGCATTAGCTGCTAGC------------TAATtgtgattctctgCAAGCGGTGTGAGCAAGGGCGAGGAGGATAACATGGCCATCATCAAGGAGTTCATGCGCTTCAAGGTGCACATGGAGGGCTCCGTGAACGGC	1	36	Insertion and Deletion	0	0		22	MRFPSIFTAVLFAASSALAAS*											MRFPSIFTAVLFAASSALAASKKKKKASGVSKGEEDNMAIIKEFMRFKVHMEGSVNG	ATGAGATTTCCTTCAATTTTTACTGCTGTTTTATTCGCAGCATCCTCCGCATTAGCTGCTAGC------------TAATTGTGATTCTCTGCAAGCGGTGTGAGCAAGGGCGAGGAGGATAACATGGCCATCATCAAGGAGTTCATGCGCTTCAAGGTGCACATGGAGGGCTCCGTGAACGGC	ATGAGATTTCCTTCAATTTTTACTGCTGTTTTATTCGCAGCATCCTCCGCATTAGCTGCTAGCAAAAAAAAAAAAAAAGCAAGCGGTGTGAGCAAGGGCGAGGAGGATAACATGGCCATCATCAAGGAGTTCATGCGCTTCAAGGTGCACATGGAGGGCTCCGTGAACGGC
ATGAGATTTCCTTCAATTTTTACTGCTGTTTTATTCGCAGCATCCTCCGCATTAGCTGCTAGC------------TAATttctacctgtggCAAGCGGTGTGAGCAAGGGCGAGGAGGATAACATGGCCATCATCAAGGAGTTCATGCGCTTCAAGGTGCACATGGAGGGCTCCGTGAACGGC	1	36	Insertion and Deletion	0	0		22	MRFPSIFTAVLFAASSALAAS*											MRFPSIFTAVLFAASSALAASKKKKKASGVSKGEEDNMAIIKEFMRFKVHMEGSVNG	ATGAGATTTCCTTCAATTTTTACTGCTGTTTTATTCGCAGCATCCTCCGCATTAGCTGCTAGC------------TAATTTCTACCTGTGGCAAGCGGTGTGAGCAAGGGCGAGGAGGATAACATGGCCATCATCAAGGAGTTCATGCGCTTCAAGGTGCACATGGAGGGCTCCGTGAACGGC	ATGAGATTTCCTTCAATTTTTACTGCTGTTTTATTCGCAGCATCCTCCGCATTAGCTGCTAGCAAAAAAAAAAAAAAAGCAAGCGGTGTGAGCAAGGGCGAGGAGGATAACATGGCCATCATCAAGGAGTTCATGCGCTTCAAGGTGCACATGGAGGGCTCCGTGAACGGC
ATGAGATTTCCTTCAATTTTTACTGCTGTTTTATTCGCAGCATCCTCCGCATTAGCTGCTAGC------------TAATtttatttttttgCAAGCGGTGTGAGCAAGGGCGAGGAGGATAACATGGCCATCATCAAGGAGTTCATGCGCTTCAAGGTGCACATGGAGGGCTCCGTGAACGGC	1	36	Insertion and Deletion	0	0		22	MRFPSIFTAVLFAASSALAAS*											MRFPSIFTAVLFAASSALAASKKKKKASGVSKGEEDNMAIIKEFMRFKVHMEGSVNG	ATGAGATTTCCTTCAATTTTTACTGCTGTTTTATTCGCAGCATCCTCCGCATTAGCTGCTAGC------------TAATTTTATTTTTTTGCAAGCGGTGTGAGCAAGGGCGAGGAGGATAACATGGCCATCATCAAGGAGTTCATGCGCTTCAAGGTGCACATGGAGGGCTCCGTGAACGGC	ATGAGATTTCCTTCAATTTTTACTGCTGTTTTATTCGCAGCATCCTCCGCATTAGCTGCTAGCAAAAAAAAAAAAAAAGCAAGCGGTGTGAGCAAGGGCGAGGAGGATAACATGGCCATCATCAAGGAGTTCATGCGCTTCAAGGTGCACATGGAGGGCTCCGTGAACGGC
ATGAGATTTCCTTCAATTTTTACTGCTGTTTTATTCGCAGCATCCTCCGCATTAGCTGCTAGC------------TAGcaggggcgattaGCAAGCGGTGTGAGCAAGGGCGAGGAGGATAACATGGCCATCATCAAGGAGTTCATGCGCTTCAAGGTGCACATGGAGGGCTCCGTGAACGGC	1	29	Insertion and Deletion	0	0		22	MRFPSIFTAVLFAASSALAAS*											MRFPSIFTAVLFAASSALAASKKKKKASGVSKGEEDNMAIIKEFMRFKVHMEGSVNG	ATGAGATTTCCTTCAATTTTTACTGCTGTTTTATTCGCAGCATCCTCCGCATTAGCTGCTAGC------------TAGCAGGGGCGATTAGCAAGCGGTGTGAGCAAGGGCGAGGAGGATAACATGGCCATCATCAAGGAGTTCATGCGCTTCAAGGTGCACATGGAGGGCTCCGTGAACGGC	ATGAGATTTCCTTCAATTTTTACTGCTGTTTTATTCGCAGCATCCTCCGCATTAGCTGCTAGCAAAAAAAAAAAAAAAGCAAGCGGTGTGAGCAAGGGCGAGGAGGATAACATGGCCATCATCAAGGAGTTCATGCGCTTCAAGGTGCACATGGAGGGCTCCGTGAACGGC
ATGAGATTTCCTTCAATTTTTACTGCTGTTTTATTCGCAGCATCCTCCGCATTAGCTGCTAGC------------TAGcccactcgggcaGCAAGCGGTGTGAGCAAGGGCGAGGAGGATAACATGGCCATCATCAAGGAGTTCATGCGCTTCAAGGTGCACATGGAGGGCTCCGTGAACGGC	1	35	Insertion and Deletion	0	0		22	MRFPSIFTAVLFAASSALAAS*											MRFPSIFTAVLFAASSALAASKKKKKASGVSKGEEDNMAIIKEFMRFKVHMEGSVNG	ATGAGATTTCCTTCAATTTTTACTGCTGTTTTATTCGCAGCATCCTCCGCATTAGCTGCTAGC------------TAGCCCACTCGGGCAGCAAGCGGTGTGAGCAAGGGCGAGGAGGATAACATGGCCATCATCAAGGAGTTCATGCGCTTCAAGGTGCACATGGAGGGCTCCGTGAACGGC	ATGAGATTTCCTTCAATTTTTACTGCTGTTTTATTCGCAGCATCCTCCGCATTAGCTGCTAGCAAAAAAAAAAAAAAAGCAAGCGGTGTGAGCAAGGGCGAGGAGGATAACATGGCCATCATCAAGGAGTTCATGCGCTTCAAGGTGCACATGGAGGGCTCCGTGAACGGC
ATGAGATTTCCTTCAATTTTTACTGCTGTTTTATTCGCAGCATCCTCCGCATTAGCTGCTAGC------------TAGccccacgtgctaGCAAGCGGTGTGAGCAAGGGCGAGGAGGATAACATGGCCATCATCAAGGAGTTCATGCGCTTCAAGGTGCACATGGAGGGCTCCGTGAACGGC	1	35	Insertion and Deletion	0	0		22	MRFPSIFTAVLFAASSALAAS*											MRFPSIFTAVLFAASSALAASKKKKKASGVSKGEEDNMAIIKEFMRFKVHMEGSVNG	ATGAGATTTCCTTCAATTTTTACTGCTGTTTTATTCGCAGCATCCTCCGCATTAGCTGCTAGC------------TAGCCCCACGTGCTAGCAAGCGGTGTGAGCAAGGGCGAGGAGGATAACATGGCCATCATCAAGGAGTTCATGCGCTTCAAGGTGCACATGGAGGGCTCCGTGAACGGC	ATGAGATTTCCTTCAATTTTTACTGCTGTTTTATTCGCAGCATCCTCCGCATTAGCTGCTAGCAAAAAAAAAAAAAAAGCAAGCGGTGTGAGCAAGGGCGAGGAGGATAACATGGCCATCATCAAGGAGTTCATGCGCTTCAAGGTGCACATGGAGGGCTCCGTGAACGGC
ATGAGATTTCCTTCAATTTTTACTGCTGTTTTATTCGCAGCATCCTCCGCATTAGCTGCTAGC------------TAGcgcgggatctgaGCAAGCGGTGTGAGCAAGGGCGAGGAGGATAACATGGCCATCATCAAGGAGTTCATGCGCTTCAAGGTGCACATGGAGGGCTCCGTGAACGGC	1	35	Insertion and Deletion	0	0		22	MRFPSIFTAVLFAASSALAAS*											MRFPSIFTAVLFAASSALAASKKKKKASGVSKGEEDNMAIIKEFMRFKVHMEGSVNG	ATGAGATTTCCTTCAATTTTTACTGCTGTTTTATTCGCAGCATCCTCCGCATTAGCTGCTAGC------------TAGCGCGGGATCTGAGCAAGCGGTGTGAGCAAGGGCGAGGAGGATAACATGGCCATCATCAAGGAGTTCATGCGCTTCAAGGTGCACATGGAGGGCTCCGTGAACGGC	ATGAGATTTCCTTCAATTTTTACTGCTGTTTTATTCGCAGCATCCTCCGCATTAGCTGCTAGCAAAAAAAAAAAAAAAGCAAGCGGTGTGAGCAAGGGCGAGGAGGATAACATGGCCATCATCAAGGAGTTCATGCGCTTCAAGGTGCACATGGAGGGCTCCGTGAACGGC
ATGAGATTTCCTTCAATTTTTACTGCTGTTTTATTCGCAGCATCCTCCGCATTAGCTGCTAGC------------TAGcgtagatcttgaGCAAGCGGTGTGAGCAAGGGCGAGGAGGATAACATGGCCATCATCAAGGAGTTCATGCGCTTCAAGGTGCACATGGAGGGCTCCGTGAACGGC	1	34	Insertion and Deletion	0	0		22	MRFPSIFTAVLFAASSALAAS*											MRFPSIFTAVLFAASSALAASKKKKKASGVSKGEEDNMAIIKEFMRFKVHMEGSVNG	ATGAGATTTCCTTCAATTTTTACTGCTGTTTTATTCGCAGCATCCTCCGCATTAGCTGCTAGC------------TAGCGTAGATCTTGAGCAAGCGGTGTGAGCAAGGGCGAGGAGGATAACATGGCCATCATCAAGGAGTTCATGCGCTTCAAGGTGCACATGGAGGGCTCCGTGAACGGC	ATGAGATTTCCTTCAATTTTTACTGCTGTTTTATTCGCAGCATCCTCCGCATTAGCTGCTAGCAAAAAAAAAAAAAAAGCAAGCGGTGTGAGCAAGGGCGAGGAGGATAACATGGCCATCATCAAGGAGTTCATGCGCTTCAAGGTGCACATGGAGGGCTCCGTGAACGGC
ATGAGATTTCCTTCAATTTTTACTGCTGTTTTATTCGCAGCATCCTCCGCATTAGCTGCTAGC------------TAGGCAA--TGTCgTGAGCAAGCGCGAGGAGGATAACATGGCCATCATCAAGGAGTTCATGCGCTTCAAGGTGCACATGGAGGGCTCCGTGAACGGC	1	37	Insertion and Deletion	0	-13		22	MRFPSIFTAVLFAASSALAAS*											MRFPSIFTAVLFAASSALAASKKKKKASGVSKGEEDNMAIIKEFMRFKVHMEGSVNG	ATGAGATTTCCTTCAATTTTTACTGCTGTTTTATTCGCAGCATCCTCCGCATTAGCTGCTAGC------------TAGGCAA--TGTCGTGAGCAAGCGCGAGGAGGATAACATGGCCATCATCAAGGAGTTCATGCGCTTCAAGGTGCACATGGAGGGCTCCGTGAACGGC	ATGAGATTTCCTTCAATTTTTACTGCTGTTTTATTCGCAGCATCCTCCGCATTAGCTGCTAGCAAAAAAAAAAAAAAAGCAAGCGGTGTGAGCAAGGGCGAGGAGGATAACATGGCCATCATCAAGGAGTTCATGCGCTTCAAGGTGCACATGGAGGGCTCCGTGAACGGC
ATGAGATTTCCTTCAATTTTTACTGCTGTTTTATTCGCAGCATCCTCCGCATTAGCTGCTAGC------------TAGgcacagtctgtaGCAAGCGGTGTGAGCAAGGGCGAGGAGGATAACATGGCCATCATCAAGGAGTTCATGCGCTTCAAGGTGCACATGGAGGGCTCCGTGAACGGC	1	31	Insertion and Deletion	0	0		22	MRFPSIFTAVLFAASSALAAS*											MRFPSIFTAVLFAASSALAASKKKKKASGVSKGEEDNMAIIKEFMRFKVHMEGSVNG	ATGAGATTTCCTTCAATTTTTACTGCTGTTTTATTCGCAGCATCCTCCGCATTAGCTGCTAGC------------TAGGCACAGTCTGTAGCAAGCGGTGTGAGCAAGGGCGAGGAGGATAACATGGCCATCATCAAGGAGTTCATGCGCTTCAAGGTGCACATGGAGGGCTCCGTGAACGGC	ATGAGATTTCCTTCAATTTTTACTGCTGTTTTATTCGCAGCATCCTCCGCATTAGCTGCTAGCAAAAAAAAAAAAAAAGCAAGCGGTGTGAGCAAGGGCGAGGAGGATAACATGGCCATCATCAAGGAGTTCATGCGCTTCAAGGTGCACATGGAGGGCTCCGTGAACGGC
ATGAGATTTCCTTCAATTTTTACTGCTGTTTTATTCGCAGCATCCTCCGCATTAGCTGCTAGC------------TAGgcccatgatgtaGCAAGCGGTGTGAGCAAGGGCGAGGAGGATAACATGGCCATCATCAAGGAGTTCATGCGCTTCAAGGTGCACATGGAGGGCTCCGTGAACGGC	1	33	Insertion and Deletion	0	0		22	MRFPSIFTAVLFAASSALAAS*											MRFPSIFTAVLFAASSALAASKKKKKASGVSKGEEDNMAIIKEFMRFKVHMEGSVNG	ATGAGATTTCCTTCAATTTTTACTGCTGTTTTATTCGCAGCATCCTCCGCATTAGCTGCTAGC------------TAGGCCCATGATGTAGCAAGCGGTGTGAGCAAGGGCGAGGAGGATAACATGGCCATCATCAAGGAGTTCATGCGCTTCAAGGTGCACATGGAGGGCTCCGTGAACGGC	ATGAGATTTCCTTCAATTTTTACTGCTGTTTTATTCGCAGCATCCTCCGCATTAGCTGCTAGCAAAAAAAAAAAAAAAGCAAGCGGTGTGAGCAAGGGCGAGGAGGATAACATGGCCATCATCAAGGAGTTCATGCGCTTCAAGGTGCACATGGAGGGCTCCGTGAACGGC
ATGAGATTTCCTTCAATTTTTACTGCTGTTTTATTCGCAGCATCCTCCGCATTAGCTGCTAGC------------TAGgcttctcatgtaGCAAGCGGTGTGAGCAAGGGCGAGGAGGATAACATGGCCATCATCAAGGAGTTCATGCGCTTTAAGGTGCACATGGAGGGCTCCGTGAACGGC	1	36	Insertion and Deletion	0	0		22	MRFPSIFTAVLFAASSALAAS*											MRFPSIFTAVLFAASSALAASKKKKKASGVSKGEEDNMAIIKEFMRFKVHMEGSVNG	ATGAGATTTCCTTCAATTTTTACTGCTGTTTTATTCGCAGCATCCTCCGCATTAGCTGCTAGC------------TAGGCTTCTCATGTAGCAAGCGGTGTGAGCAAGGGCGAGGAGGATAACATGGCCATCATCAAGGAGTTCATGCGCTTTAAGGTGCACATGGAGGGCTCCGTGAACGGC	ATGAGATTTCCTTCAATTTTTACTGCTGTTTTATTCGCAGCATCCTCCGCATTAGCTGCTAGCAAAAAAAAAAAAAAAGCAAGCGGTGTGAGCAAGGGCGAGGAGGATAACATGGCCATCATCAAGGAGTTCATGCGCTTCAAGGTGCACATGGAGGGCTCCGTGAACGGC
ATGAGATTTCCTTCAATTTTTACTGCTGTTTTATTCGCAGCATCCTCCGCATTAGCTGCTAGC------------TAGggctttcgacgaGCAAGCGGTGTGAGCAAGGGCGAGGAGGATAACATGGCCATCATCAAGGAGTTCATGCGCTTCAAGGTGCACATGGAGGGCTCCGTGAACGGC	1	35	Insertion and Deletion	0	0		22	MRFPSIFTAVLFAASSALAAS*											MRFPSIFTAVLFAASSALAASKKKKKASGVSKGEEDNMAIIKEFMRFKVHMEGSVNG	ATGAGATTTCCTTCAATTTTTACTGCTGTTTTATTCGCAGCATCCTCCGCATTAGCTGCTAGC------------TAGGGCTTTCGACGAGCAAGCGGTGTGAGCAAGGGCGAGGAGGATAACATGGCCATCATCAAGGAGTTCATGCGCTTCAAGGTGCACATGGAGGGCTCCGTGAACGGC	ATGAGATTTCCTTCAATTTTTACTGCTGTTTTATTCGCAGCATCCTCCGCATTAGCTGCTAGCAAAAAAAAAAAAAAAGCAAGCGGTGTGAGCAAGGGCGAGGAGGATAACATGGCCATCATCAAGGAGTTCATGCGCTTCAAGGTGCACATGGAGGGCTCCGTGAACGGC
ATGAGATTTCCTTCAATTTTTACTGCTGTTTTATTCGCAGCATCCTCCGCATTAGCTGCTAGC------------TAGgtaggatcttcaGCAAGCGGTGTGAGCAAGGGCGAGGAGGATAACATGGCCATCATCAAGGAGTTCATGCGCTTCAAGGTGCACATGGAGGGCTCCGTGAACGGC	1	36	Insertion and Deletion	0	0		22	MRFPSIFTAVLFAASSALAAS*											MRFPSIFTAVLFAASSALAASKKKKKASGVSKGEEDNMAIIKEFMRFKVHMEGSVNG	ATGAGATTTCCTTCAATTTTTACTGCTGTTTTATTCGCAGCATCCTCCGCATTAGCTGCTAGC------------TAGGTAGGATCTTCAGCAAGCGGTGTGAGCAAGGGCGAGGAGGATAACATGGCCATCATCAAGGAGTTCATGCGCTTCAAGGTGCACATGGAGGGCTCCGTGAACGGC	ATGAGATTTCCTTCAATTTTTACTGCTGTTTTATTCGCAGCATCCTCCGCATTAGCTGCTAGCAAAAAAAAAAAAAAAGCAAGCGGTGTGAGCAAGGGCGAGGAGGATAACATGGCCATCATCAAGGAGTTCATGCGCTTCAAGGTGCACATGGAGGGCTCCGTGAACGGC
ATGAGATTTCCTTCAATTTTTACTGCTGTTTTATTCGCAGCATCCTCCGCATTAGCTGCTAGC------------TAGgtccggtctccaGCAAGCGGTGTGAGCAAGGGCGAGGAGGATAACATGGCCATCATCAAGGAGTTCATGCGCTTCAAGGTGCACATGGAGGGCTCCGTGAACGGC	1	31	Insertion and Deletion	0	0		22	MRFPSIFTAVLFAASSALAAS*											MRFPSIFTAVLFAASSALAASKKKKKASGVSKGEEDNMAIIKEFMRFKVHMEGSVNG	ATGAGATTTCCTTCAATTTTTACTGCTGTTTTATTCGCAGCATCCTCCGCATTAGCTGCTAGC------------TAGGTCCGGTCTCCAGCAAGCGGTGTGAGCAAGGGCGAGGAGGATAACATGGCCATCATCAAGGAGTTCATGCGCTTCAAGGTGCACATGGAGGGCTCCGTGAACGGC	ATGAGATTTCCTTCAATTTTTACTGCTGTTTTATTCGCAGCATCCTCCGCATTAGCTGCTAGCAAAAAAAAAAAAAAAGCAAGCGGTGTGAGCAAGGGCGAGGAGGATAACATGGCCATCATCAAGGAGTTCATGCGCTTCAAGGTGCACATGGAGGGCTCCGTGAACGGC
ATGAGATTTCCTTCAATTTTTACTGCTGTTTTATTCGCAGCATCCTCCGCATTAGCTGCTAGC------------TAGgtgctatattgaGCAAGCGGTGTGAGCAAGGGCGAGGAGGATAACATGGCCATCATCAAGGAGTTCATGCGCTTCAAGGTGCACATGGAGGGCTCCGTGAACGGC	1	36	Insertion and Deletion	0	0		22	MRFPSIFTAVLFAASSALAAS*											MRFPSIFTAVLFAASSALAASKKKKKASGVSKGEEDNMAIIKEFMRFKVHMEGSVNG	ATGAGATTTCCTTCAATTTTTACTGCTGTTTTATTCGCAGCATCCTCCGCATTAGCTGCTAGC------------TAGGTGCTATATTGAGCAAGCGGTGTGAGCAAGGGCGAGGAGGATAACATGGCCATCATCAAGGAGTTCATGCGCTTCAAGGTGCACATGGAGGGCTCCGTGAACGGC	ATGAGATTTCCTTCAATTTTTACTGCTGTTTTATTCGCAGCATCCTCCGCATTAGCTGCTAGCAAAAAAAAAAAAAAAGCAAGCGGTGTGAGCAAGGGCGAGGAGGATAACATGGCCATCATCAAGGAGTTCATGCGCTTCAAGGTGCACATGGAGGGCTCCGTGAACGGC
ATGAGATTTCCTTCAATTTTTACTGCTGTTTTATTCGCAGCATCCTCCGCATTAGCTGCTAGC------------TAGgtgtccgcttcaGCAAGCGGTGTGAGCAAGGGCGAGGAGGATAACATGGCCATCATCAAGGAGTTCATGCGCTTCAAGGTGCACATGGAGGGCTCCGTGAACGGC	1	36	Insertion and Deletion	0	0		22	MRFPSIFTAVLFAASSALAAS*											MRFPSIFTAVLFAASSALAASKKKKKASGVSKGEEDNMAIIKEFMRFKVHMEGSVNG	ATGAGATTTCCTTCAATTTTTACTGCTGTTTTATTCGCAGCATCCTCCGCATTAGCTGCTAGC------------TAGGTGTCCGCTTCAGCAAGCGGTGTGAGCAAGGGCGAGGAGGATAACATGGCCATCATCAAGGAGTTCATGCGCTTCAAGGTGCACATGGAGGGCTCCGTGAACGGC	ATGAGATTTCCTTCAATTTTTACTGCTGTTTTATTCGCAGCATCCTCCGCATTAGCTGCTAGCAAAAAAAAAAAAAAAGCAAGCGGTGTGAGCAAGGGCGAGGAGGATAACATGGCCATCATCAAGGAGTTCATGCGCTTCAAGGTGCACATGGAGGGCTCCGTGAACGGC
ATGAGATTTCCTTCAATTTTTACTGCTGTTTTATTCGCAGCATCCTCCGCATTAGCTGCTAGC------------TAGgtttccatttgaGCAAGCGGTGTGAGCAAGGGCGAGGAGGATAACATGGCCATCATCAAGGAGTTCATGCGCTTCAAGGTGCACATGGAGGGCTCCGTGAACGGC	1	36	Insertion and Deletion	0	0		22	MRFPSIFTAVLFAASSALAAS*											MRFPSIFTAVLFAASSALAASKKKKKASGVSKGEEDNMAIIKEFMRFKVHMEGSVNG	ATGAGATTTCCTTCAATTTTTACTGCTGTTTTATTCGCAGCATCCTCCGCATTAGCTGCTAGC------------TAGGTTTCCATTTGAGCAAGCGGTGTGAGCAAGGGCGAGGAGGATAACATGGCCATCATCAAGGAGTTCATGCGCTTCAAGGTGCACATGGAGGGCTCCGTGAACGGC	ATGAGATTTCCTTCAATTTTTACTGCTGTTTTATTCGCAGCATCCTCCGCATTAGCTGCTAGCAAAAAAAAAAAAAAAGCAAGCGGTGTGAGCAAGGGCGAGGAGGATAACATGGCCATCATCAAGGAGTTCATGCGCTTCAAGGTGCACATGGAGGGCTCCGTGAACGGC
ATGAGATTTCCTTCAATTTTTACTGCTGTTTTATTCGCAGCATCCTCCGCATTAGCTGCTAGC------------TAGtatctctatggaGCAAGCGGTGTGAGCAAGGGCGAGGAGGATAACATGGCCATCATCAAGGAGTTCATGCGCTTCAAGGTGCACATGGAGGGCTCCGTGAACGGC	1	36	Insertion and Deletion	0	0		22	MRFPSIFTAVLFAASSALAAS*											MRFPSIFTAVLFAASSALAASKKKKKASGVSKGEEDNMAIIKEFMRFKVHMEGSVNG	ATGAGATTTCCTTCAATTTTTACTGCTGTTTTATTCGCAGCATCCTCCGCATTAGCTGCTAGC------------TAGTATCTCTATGGAGCAAGCGGTGTGAGCAAGGGCGAGGAGGATAACATGGCCATCATCAAGGAGTTCATGCGCTTCAAGGTGCACATGGAGGGCTCCGTGAACGGC	ATGAGATTTCCTTCAATTTTTACTGCTGTTTTATTCGCAGCATCCTCCGCATTAGCTGCTAGCAAAAAAAAAAAAAAAGCAAGCGGTGTGAGCAAGGGCGAGGAGGATAACATGGCCATCATCAAGGAGTTCATGCGCTTCAAGGTGCACATGGAGGGCTCCGTGAACGGC
ATGAGATTTCCTTCAATTTTTACTGCTGTTTTATTCGCAGCATCCTCCGCATTAGCTGCTAGC------------TAGtccactcattcaGCAAGCGGTGTGAGCAAGGGCGAGGAGGATAACATGGCCATCATCAAGGAGTTCATGCGCTTCAAGGTGCACATGGAGGGCTCCGTGAACGGC	1	33	Insertion and Deletion	0	0		22	MRFPSIFTAVLFAASSALAAS*											MRFPSIFTAVLFAASSALAASKKKKKASGVSKGEEDNMAIIKEFMRFKVHMEGSVNG	ATGAGATTTCCTTCAATTTTTACTGCTGTTTTATTCGCAGCATCCTCCGCATTAGCTGCTAGC------------TAGTCCACTCATTCAGCAAGCGGTGTGAGCAAGGGCGAGGAGGATAACATGGCCATCATCAAGGAGTTCATGCGCTTCAAGGTGCACATGGAGGGCTCCGTGAACGGC	ATGAGATTTCCTTCAATTTTTACTGCTGTTTTATTCGCAGCATCCTCCGCATTAGCTGCTAGCAAAAAAAAAAAAAAAGCAAGCGGTGTGAGCAAGGGCGAGGAGGATAACATGGCCATCATCAAGGAGTTCATGCGCTTCAAGGTGCACATGGAGGGCTCCGTGAACGGC
ATGAGATTTCCTTCAATTTTTACTGCTGTTTTATTCGCAGCATCCTCCGCATTAGCTGCTAGC------------TAGtctagatgcccaGCAAGCGGTGTGAGCAAGGGCGAGGAGGATAACATGGCCATCATCAAGGAGTTCATGCGCTTCAAGGTGCACATGGAGGGCTCCGTGAACGGC	1	36	Insertion and Deletion	0	0		22	MRFPSIFTAVLFAASSALAAS*											MRFPSIFTAVLFAASSALAASKKKKKASGVSKGEEDNMAIIKEFMRFKVHMEGSVNG	ATGAGATTTCCTTCAATTTTTACTGCTGTTTTATTCGCAGCATCCTCCGCATTAGCTGCTAGC------------TAGTCTAGATGCCCAGCAAGCGGTGTGAGCAAGGGCGAGGAGGATAACATGGCCATCATCAAGGAGTTCATGCGCTTCAAGGTGCACATGGAGGGCTCCGTGAACGGC	ATGAGATTTCCTTCAATTTTTACTGCTGTTTTATTCGCAGCATCCTCCGCATTAGCTGCTAGCAAAAAAAAAAAAAAAGCAAGCGGTGTGAGCAAGGGCGAGGAGGATAACATGGCCATCATCAAGGAGTTCATGCGCTTCAAGGTGCACATGGAGGGCTCCGTGAACGGC
ATGAGATTTCCTTCAATTTTTACTGCTGTTTTATTCGCAGCATCCTCCGCATTAGCTGCTAGC------------TAGttttcttttgtaGCAAGCGGTGTGAGCAAGGGCGAGGAGGATAACATGGCCATCATCAAGGAGTTCATGCGCTTCAAGGTGCACATGGAGGGCTCCGTGAACGGC	1	32	Insertion and Deletion	0	0		22	MRFPSIFTAVLFAASSALAAS*											MRFPSIFTAVLFAASSALAASKKKKKASGVSKGEEDNMAIIKEFMRFKVHMEGSVNG	ATGAGATTTCCTTCAATTTTTACTGCTGTTTTATTCGCAGCATCCTCCGCATTAGCTGCTAGC------------TAGTTTTCTTTTGTAGCAAGCGGTGTGAGCAAGGGCGAGGAGGATAACATGGCCATCATCAAGGAGTTCATGCGCTTCAAGGTGCACATGGAGGGCTCCGTGAACGGC	ATGAGATTTCCTTCAATTTTTACTGCTGTTTTATTCGCAGCATCCTCCGCATTAGCTGCTAGCAAAAAAAAAAAAAAAGCAAGCGGTGTGAGCAAGGGCGAGGAGGATAACATGGCCATCATCAAGGAGTTCATGCGCTTCAAGGTGCACATGGAGGGCTCCGTGAACGGC
ATGAGATTTCCTTCAATTTTTACTGCTGTTTTATTCGCAGCATCCTCCGCATTAGCTGCTAGC------------TGACccccccacgtggCAAGCGGTGTGAGCAAGGGCGAGGAGGATAACATGGCCATCATCAAGGAGTTCATGCGCTTCAAGGTGCACATGGAGGGCTCCGTGAACGGC	1	35	Insertion and Deletion	0	0		22	MRFPSIFTAVLFAASSALAAS*											MRFPSIFTAVLFAASSALAASKKKKKASGVSKGEEDNMAIIKEFMRFKVHMEGSVNG	ATGAGATTTCCTTCAATTTTTACTGCTGTTTTATTCGCAGCATCCTCCGCATTAGCTGCTAGC------------TGACCCCCCCACGTGGCAAGCGGTGTGAGCAAGGGCGAGGAGGATAACATGGCCATCATCAAGGAGTTCATGCGCTTCAAGGTGCACATGGAGGGCTCCGTGAACGGC	ATGAGATTTCCTTCAATTTTTACTGCTGTTTTATTCGCAGCATCCTCCGCATTAGCTGCTAGCAAAAAAAAAAAAAAAGCAAGCGGTGTGAGCAAGGGCGAGGAGGATAACATGGCCATCATCAAGGAGTTCATGCGCTTCAAGGTGCACATGGAGGGCTCCGTGAACGGC
ATGAGATTTCCTTCAATTTTTACTGCTGTTTTATTCGCAGCATCCTCCGCATTAGCTGCTAGC------------TGACcttcccgttgggCAAGCGGTGTGAGCAAGGGCGAGGAGGATAACATGGCCATCATCAAGGAGTTCATGCGCTTCAAGGTGCACATGGAGGGCTCCGTGAACGGC	1	32	Insertion and Deletion	0	0		22	MRFPSIFTAVLFAASSALAAS*											MRFPSIFTAVLFAASSALAASKKKKKASGVSKGEEDNMAIIKEFMRFKVHMEGSVNG	ATGAGATTTCCTTCAATTTTTACTGCTGTTTTATTCGCAGCATCCTCCGCATTAGCTGCTAGC------------TGACCTTCCCGTTGGGCAAGCGGTGTGAGCAAGGGCGAGGAGGATAACATGGCCATCATCAAGGAGTTCATGCGCTTCAAGGTGCACATGGAGGGCTCCGTGAACGGC	ATGAGATTTCCTTCAATTTTTACTGCTGTTTTATTCGCAGCATCCTCCGCATTAGCTGCTAGCAAAAAAAAAAAAAAAGCAAGCGGTGTGAGCAAGGGCGAGGAGGATAACATGGCCATCATCAAGGAGTTCATGCGCTTCAAGGTGCACATGGAGGGCTCCGTGAACGGC
ATGAGATTTCCTTCAATTTTTACTGCTGTTTTATTCGCAGCATCCTCCGCATTAGCTGCTAGC------------TGACctttatgtccgggCAAGCGGTGTGAGCAAGGGCGAGGAGGATAACATGGCCATCATCAAGGAGTTCATGCGCTTCAAGGTGCACATGGAGGGCTCCGTGAACGGC	1	35	Insertion and Deletion	0	1		22	MRFPSIFTAVLFAASSALAAS*											MRFPSIFTAVLFAASSALAASKKKKKASGVSKGEEDNMAIIKEFMRFKVHMEGSVNG	ATGAGATTTCCTTCAATTTTTACTGCTGTTTTATTCGCAGCATCCTCCGCATTAGCTGCTAGC------------TGACCTTTATGTCCGGGCAAGCGGTGTGAGCAAGGGCGAGGAGGATAACATGGCCATCATCAAGGAGTTCATGCGCTTCAAGGTGCACATGGAGGGCTCCGTGAACGGC	ATGAGATTTCCTTCAATTTTTACTGCTGTTTTATTCGCAGCATCCTCCGCATTAGCTGCTAGCAAAAAAAAAAAAAAAGCAAGCGGTGTGAGCAAGGGCGAGGAGGATAACATGGCCATCATCAAGGAGTTCATGCGCTTCAAGGTGCACATGGAGGGCTCCGTGAACGGC
ATGAGATTTCCTTCAATTTTTACTGCTGTTTTATTCGCAGCATCCTCCGCATTAGCTGCTAGC------------TGACcttttgttcctgCAAGCGGTGTGAGCAAGGGCGAGGAGGATAACATGGCCATCATCAAGGAGTTCATGCGCTTCAAGGTGCACATGGAGGGCTCCGTGAACGGC	1	35	Insertion and Deletion	0	0		22	MRFPSIFTAVLFAASSALAAS*											MRFPSIFTAVLFAASSALAASKKKKKASGVSKGEEDNMAIIKEFMRFKVHMEGSVNG	ATGAGATTTCCTTCAATTTTTACTGCTGTTTTATTCGCAGCATCCTCCGCATTAGCTGCTAGC------------TGACCTTTTGTTCCTGCAAGCGGTGTGAGCAAGGGCGAGGAGGATAACATGGCCATCATCAAGGAGTTCATGCGCTTCAAGGTGCACATGGAGGGCTCCGTGAACGGC	ATGAGATTTCCTTCAATTTTTACTGCTGTTTTATTCGCAGCATCCTCCGCATTAGCTGCTAGCAAAAAAAAAAAAAAAGCAAGCGGTGTGAGCAAGGGCGAGGAGGATAACATGGCCATCATCAAGGAGTTCATGCGCTTCAAGGTGCACATGGAGGGCTCCGTGAACGGC
ATGAGATTTCCTTCAATTTTTACTGCTGTTTTATTCGCAGCATCCTCCGCATTAGCTGCTAGC------------TGACgaccggtttgtggCAAGCGGTGTGAGCAAGGGCGAGGAGGATAACATGGCCATCATCAAGGAGTTCATGCGCTTCAAGGTGCACATGGAGGGCTCCGTGAACGGC	1	33	Insertion and Deletion	0	1		22	MRFPSIFTAVLFAASSALAAS*											MRFPSIFTAVLFAASSALAASKKKKKASGVSKGEEDNMAIIKEFMRFKVHMEGSVNG	ATGAGATTTCCTTCAATTTTTACTGCTGTTTTATTCGCAGCATCCTCCGCATTAGCTGCTAGC------------TGACGACCGGTTTGTGGCAAGCGGTGTGAGCAAGGGCGAGGAGGATAACATGGCCATCATCAAGGAGTTCATGCGCTTCAAGGTGCACATGGAGGGCTCCGTGAACGGC	ATGAGATTTCCTTCAATTTTTACTGCTGTTTTATTCGCAGCATCCTCCGCATTAGCTGCTAGCAAAAAAAAAAAAAAAGCAAGCGGTGTGAGCAAGGGCGAGGAGGATAACATGGCCATCATCAAGGAGTTCATGCGCTTCAAGGTGCACATGGAGGGCTCCGTGAACGGC
ATGAGATTTCCTTCAATTTTTACTGCTGTTTTATTCGCAGCATCCTCCGCATTAGCTGCTAGC------------TGACgacgtcgccgggCAAGCGGTGTGAGCAAGGGCGAGGAGGATAACATGGCCATCATCAAGGAGTTCATGCGCTTCAAGGTGCACATGGAGGGCTCCGTGAACGGC	1	35	Insertion and Deletion	0	0		22	MRFPSIFTAVLFAASSALAAS*											MRFPSIFTAVLFAASSALAASKKKKKASGVSKGEEDNMAIIKEFMRFKVHMEGSVNG	ATGAGATTTCCTTCAATTTTTACTGCTGTTTTATTCGCAGCATCCTCCGCATTAGCTGCTAGC------------TGACGACGTCGCCGGGCAAGCGGTGTGAGCAAGGGCGAGGAGGATAACATGGCCATCATCAAGGAGTTCATGCGCTTCAAGGTGCACATGGAGGGCTCCGTGAACGGC	ATGAGATTTCCTTCAATTTTTACTGCTGTTTTATTCGCAGCATCCTCCGCATTAGCTGCTAGCAAAAAAAAAAAAAAAGCAAGCGGTGTGAGCAAGGGCGAGGAGGATAACATGGCCATCATCAAGGAGTTCATGCGCTTCAAGGTGCACATGGAGGGCTCCGTGAACGGC
ATGAGATTTCCTTCAATTTTTACTGCTGTTTTATTCGCAGCATCCTCCGCATTAGCTGCTAGC------------TGACgatgttgatgggCAAGCGGTGTGAGCAAGGGCGAGGAGGATAACATGGCCATCATCAAGGAGTTCATGCGCTTCAAGGTGCACATGGAGGGCTCCGTGAACGGC	1	24	Insertion and Deletion	0	0		22	MRFPSIFTAVLFAASSALAAS*											MRFPSIFTAVLFAASSALAASKKKKKASGVSKGEEDNMAIIKEFMRFKVHMEGSVNG	ATGAGATTTCCTTCAATTTTTACTGCTGTTTTATTCGCAGCATCCTCCGCATTAGCTGCTAGC------------TGACGATGTTGATGGGCAAGCGGTGTGAGCAAGGGCGAGGAGGATAACATGGCCATCATCAAGGAGTTCATGCGCTTCAAGGTGCACATGGAGGGCTCCGTGAACGGC	ATGAGATTTCCTTCAATTTTTACTGCTGTTTTATTCGCAGCATCCTCCGCATTAGCTGCTAGCAAAAAAAAAAAAAAAGCAAGCGGTGTGAGCAAGGGCGAGGAGGATAACATGGCCATCATCAAGGAGTTCATGCGCTTCAAGGTGCACATGGAGGGCTCCGTGAACGGC
ATGAGATTTCCTTCAATTTTTACTGCTGTTTTATTCGCAGCATCCTCCGCATTAGCTGCTAGC------------TGACggcatctcgttgCAAGCGGTGTGAGCAAGGGCGAGGAGGATAACATGGCCATCATCAAGGAGTTCATGCGCTTCAAGGTGCACATGGAGGGCTCCGTGAACGGC	1	33	Insertion and Deletion	0	0		22	MRFPSIFTAVLFAASSALAAS*											MRFPSIFTAVLFAASSALAASKKKKKASGVSKGEEDNMAIIKEFMRFKVHMEGSVNG	ATGAGATTTCCTTCAATTTTTACTGCTGTTTTATTCGCAGCATCCTCCGCATTAGCTGCTAGC------------TGACGGCATCTCGTTGCAAGCGGTGTGAGCAAGGGCGAGGAGGATAACATGGCCATCATCAAGGAGTTCATGCGCTTCAAGGTGCACATGGAGGGCTCCGTGAACGGC	ATGAGATTTCCTTCAATTTTTACTGCTGTTTTATTCGCAGCATCCTCCGCATTAGCTGCTAGCAAAAAAAAAAAAAAAGCAAGCGGTGTGAGCAAGGGCGAGGAGGATAACATGGCCATCATCAAGGAGTTCATGCGCTTCAAGGTGCACATGGAGGGCTCCGTGAACGGC
ATGAGATTTCCTTCAATTTTTACTGCTGTTTTATTCGCAGCATCCTCCGCATTAGCTGCTAGC------------TGACggggcgttctggCAAGCGGTGTGAGCAAGGGCGAGGAGGATAACATGGCCATCATCAAGGAGTTCATGCGCTTCAAGGTGCACATGGAGGGCTCCGTGAACGGC	1	32	Insertion and Deletion	0	0		22	MRFPSIFTAVLFAASSALAAS*											MRFPSIFTAVLFAASSALAASKKKKKASGVSKGEEDNMAIIKEFMRFKVHMEGSVNG	ATGAGATTTCCTTCAATTTTTACTGCTGTTTTATTCGCAGCATCCTCCGCATTAGCTGCTAGC------------TGACGGGGCGTTCTGGCAAGCGGTGTGAGCAAGGGCGAGGAGGATAACATGGCCATCATCAAGGAGTTCATGCGCTTCAAGGTGCACATGGAGGGCTCCGTGAACGGC	ATGAGATTTCCTTCAATTTTTACTGCTGTTTTATTCGCAGCATCCTCCGCATTAGCTGCTAGCAAAAAAAAAAAAAAAGCAAGCGGTGTGAGCAAGGGCGAGGAGGATAACATGGCCATCATCAAGGAGTTCATGCGCTTCAAGGTGCACATGGAGGGCTCCGTGAACGGC
ATGAGATTTCCTTCAATTTTTACTGCTGTTTTATTCGCAGCATCCTCCGCATTAGCTGCTAGC------------TGACggttacgacttgCAAGCGGTGTGAGCAAGGGCGAGGAGGATAACATGGCCATCATCAAGGAGTTCATGCGCTTCAAGGTGCACATGGAGGGCTCCGTGAACGGC	1	28	Insertion and Deletion	0	0		22	MRFPSIFTAVLFAASSALAAS*											MRFPSIFTAVLFAASSALAASKKKKKASGVSKGEEDNMAIIKEFMRFKVHMEGSVNG	ATGAGATTTCCTTCAATTTTTACTGCTGTTTTATTCGCAGCATCCTCCGCATTAGCTGCTAGC------------TGACGGTTACGACTTGCAAGCGGTGTGAGCAAGGGCGAGGAGGATAACATGGCCATCATCAAGGAGTTCATGCGCTTCAAGGTGCACATGGAGGGCTCCGTGAACGGC	ATGAGATTTCCTTCAATTTTTACTGCTGTTTTATTCGCAGCATCCTCCGCATTAGCTGCTAGCAAAAAAAAAAAAAAAGCAAGCGGTGTGAGCAAGGGCGAGGAGGATAACATGGCCATCATCAAGGAGTTCATGCGCTTCAAGGTGCACATGGAGGGCTCCGTGAACGGC
ATGAGATTTCCTTCAATTTTTACTGCTGTTTTATTCGCAGCATCCTCCGCATTAGCTGCTAGC------------TGACgtggacttttgCAAGCGGTGTGAGCAAGGGCGAGGAGGATAACATGGCCATCATCAAGGAGTTCATGCGCTTCAAGGTGCACATGGAGGGCTCCGTGAACGGC	1	29	Insertion and Deletion	0	-1		22	MRFPSIFTAVLFAASSALAAS*											MRFPSIFTAVLFAASSALAASKKKKKASGVSKGEEDNMAIIKEFMRFKVHMEGSVNG	ATGAGATTTCCTTCAATTTTTACTGCTGTTTTATTCGCAGCATCCTCCGCATTAGCTGCTAGC------------TGACGTGGACTTTTGCAAGCGGTGTGAGCAAGGGCGAGGAGGATAACATGGCCATCATCAAGGAGTTCATGCGCTTCAAGGTGCACATGGAGGGCTCCGTGAACGGC	ATGAGATTTCCTTCAATTTTTACTGCTGTTTTATTCGCAGCATCCTCCGCATTAGCTGCTAGCAAAAAAAAAAAAAAAGCAAGCGGTGTGAGCAAGGGCGAGGAGGATAACATGGCCATCATCAAGGAGTTCATGCGCTTCAAGGTGCACATGGAGGGCTCCGTGAACGGC
ATGAGATTTCCTTCAATTTTTACTGCTGTTTTATTCGCAGCATCCTCCGCATTAGCTGCTAGC------------TGACgttgcgtgtgggCAAGCGGTGTGAGCAAGGGCGAGGAGGATAACATGGCCATCATCAAGGAGTTCATGCGCTTCAAGGTGCACATGGAGGGCTCCGTGAACGGC	1	36	Insertion and Deletion	0	0		22	MRFPSIFTAVLFAASSALAAS*											MRFPSIFTAVLFAASSALAASKKKKKASGVSKGEEDNMAIIKEFMRFKVHMEGSVNG	ATGAGATTTCCTTCAATTTTTACTGCTGTTTTATTCGCAGCATCCTCCGCATTAGCTGCTAGC------------TGACGTTGCGTGTGGGCAAGCGGTGTGAGCAAGGGCGAGGAGGATAACATGGCCATCATCAAGGAGTTCATGCGCTTCAAGGTGCACATGGAGGGCTCCGTGAACGGC	ATGAGATTTCCTTCAATTTTTACTGCTGTTTTATTCGCAGCATCCTCCGCATTAGCTGCTAGCAAAAAAAAAAAAAAAGCAAGCGGTGTGAGCAAGGGCGAGGAGGATAACATGGCCATCATCAAGGAGTTCATGCGCTTCAAGGTGCACATGGAGGGCTCCGTGAACGGC
ATGAGATTTCCTTCAATTTTTACTGCTGTTTTATTCGCAGCATCCTCCGCATTAGCTGCTAGC------------TGACgttgtgcttcggCAAGCGGTGTGAGCAAGGGCGAGGAGGATAACATGGCCATCATCAAGGAGTTCATGCGCTTCAAGGTGCACATGGAGGGCTCCGTGAACGGC	1	36	Insertion and Deletion	0	0		22	MRFPSIFTAVLFAASSALAAS*											MRFPSIFTAVLFAASSALAASKKKKKASGVSKGEEDNMAIIKEFMRFKVHMEGSVNG	ATGAGATTTCCTTCAATTTTTACTGCTGTTTTATTCGCAGCATCCTCCGCATTAGCTGCTAGC------------TGACGTTGTGCTTCGGCAAGCGGTGTGAGCAAGGGCGAGGAGGATAACATGGCCATCATCAAGGAGTTCATGCGCTTCAAGGTGCACATGGAGGGCTCCGTGAACGGC	ATGAGATTTCCTTCAATTTTTACTGCTGTTTTATTCGCAGCATCCTCCGCATTAGCTGCTAGCAAAAAAAAAAAAAAAGCAAGCGGTGTGAGCAAGGGCGAGGAGGATAACATGGCCATCATCAAGGAGTTCATGCGCTTCAAGGTGCACATGGAGGGCTCCGTGAACGGC
ATGAGATTTCCTTCAATTTTTACTGCTGTTTTATTCGCAGCATCCTCCGCATTAGCTGCTAGC------------TGACtagttggacgtgCAAGCGGTGTGAGCAAGGGCGAGGAGGATAACATGGCCATCATCAAGGAGTTCATGCGCTTCAAGGTGCACATGGAGGGCTCCGTGAACGGC	1	30	Insertion and Deletion	0	0		22	MRFPSIFTAVLFAASSALAAS*											MRFPSIFTAVLFAASSALAASKKKKKASGVSKGEEDNMAIIKEFMRFKVHMEGSVNG	ATGAGATTTCCTTCAATTTTTACTGCTGTTTTATTCGCAGCATCCTCCGCATTAGCTGCTAGC------------TGACTAGTTGGACGTGCAAGCGGTGTGAGCAAGGGCGAGGAGGATAACATGGCCATCATCAAGGAGTTCATGCGCTTCAAGGTGCACATGGAGGGCTCCGTGAACGGC	ATGAGATTTCCTTCAATTTTTACTGCTGTTTTATTCGCAGCATCCTCCGCATTAGCTGCTAGCAAAAAAAAAAAAAAAGCAAGCGGTGTGAGCAAGGGCGAGGAGGATAACATGGCCATCATCAAGGAGTTCATGCGCTTCAAGGTGCACATGGAGGGCTCCGTGAACGGC
ATGAGATTTCCTTCAATTTTTACTGCTGTTTTATTCGCAGCATCCTCCGCATTAGCTGCTAGC------------TGACtcacggatcctgCAAGCGGTGTGAGCAAGGGCGAGGAGGATAACATGGCCATCATCAAGGAGTTCATGCGCTTCAAGGTGCACATGGAGGGCTCCGTGAACGGC	1	36	Insertion and Deletion	0	0		22	MRFPSIFTAVLFAASSALAAS*											MRFPSIFTAVLFAASSALAASKKKKKASGVSKGEEDNMAIIKEFMRFKVHMEGSVNG	ATGAGATTTCCTTCAATTTTTACTGCTGTTTTATTCGCAGCATCCTCCGCATTAGCTGCTAGC------------TGACTCACGGATCCTGCAAGCGGTGTGAGCAAGGGCGAGGAGGATAACATGGCCATCATCAAGGAGTTCATGCGCTTCAAGGTGCACATGGAGGGCTCCGTGAACGGC	ATGAGATTTCCTTCAATTTTTACTGCTGTTTTATTCGCAGCATCCTCCGCATTAGCTGCTAGCAAAAAAAAAAAAAAAGCAAGCGGTGTGAGCAAGGGCGAGGAGGATAACATGGCCATCATCAAGGAGTTCATGCGCTTCAAGGTGCACATGGAGGGCTCCGTGAACGGC
ATGAGATTTCCTTCAATTTTTACTGCTGTTTTATTCGCAGCATCCTCCGCATTAGCTGCTAGC------------TGACtcctctctgctgCAAGCGGTtGTGAGCAAGGGCGAGGAGGATAACATGGCCATCATCAAGGAGTTCATGCGCTTCAAGGTGCACATGGAGGGCTCCGTGAACGGC	1	36	Insertion and Deletion	0	1		22	MRFPSIFTAVLFAASSALAAS*											MRFPSIFTAVLFAASSALAASKKKKKASGVSKGEEDNMAIIKEFMRFKVHMEGSVNG	ATGAGATTTCCTTCAATTTTTACTGCTGTTTTATTCGCAGCATCCTCCGCATTAGCTGCTAGC------------TGACTCCTCTCTGCTGCAAGCGGTTGTGAGCAAGGGCGAGGAGGATAACATGGCCATCATCAAGGAGTTCATGCGCTTCAAGGTGCACATGGAGGGCTCCGTGAACGGC	ATGAGATTTCCTTCAATTTTTACTGCTGTTTTATTCGCAGCATCCTCCGCATTAGCTGCTAGCAAAAAAAAAAAAAAAGCAAGCGGTGTGAGCAAGGGCGAGGAGGATAACATGGCCATCATCAAGGAGTTCATGCGCTTCAAGGTGCACATGGAGGGCTCCGTGAACGGC
ATGAGATTTCCTTCAATTTTTACTGCTGTTTTATTCGCAGCATCCTCCGCATTAGCTGCTAGC------------TGACtcgacgagttggCAAGCGGTGTGAGCAAGGGCGAGGAGGATAACATGGCCATCATCAAGGAGTTCATGCGCTTCAAGGTGCACATGGAGGGCTCCGTGAACGGC	1	36	Insertion and Deletion	0	0		22	MRFPSIFTAVLFAASSALAAS*											MRFPSIFTAVLFAASSALAASKKKKKASGVSKGEEDNMAIIKEFMRFKVHMEGSVNG	ATGAGATTTCCTTCAATTTTTACTGCTGTTTTATTCGCAGCATCCTCCGCATTAGCTGCTAGC------------TGACTCGACGAGTTGGCAAGCGGTGTGAGCAAGGGCGAGGAGGATAACATGGCCATCATCAAGGAGTTCATGCGCTTCAAGGTGCACATGGAGGGCTCCGTGAACGGC	ATGAGATTTCCTTCAATTTTTACTGCTGTTTTATTCGCAGCATCCTCCGCATTAGCTGCTAGCAAAAAAAAAAAAAAAGCAAGCGGTGTGAGCAAGGGCGAGGAGGATAACATGGCCATCATCAAGGAGTTCATGCGCTTCAAGGTGCACATGGAGGGCTCCGTGAACGGC
ATGAGATTTCCTTCAATTTTTACTGCTGTTTTATTCGCAGCATCCTCCGCATTAGCTGCTAGC------------TGACtcgattgaccggCAAGCGGTGTGAGCAAGGGCGAGGAGGATAACATGGCCATCATCAAGGAGTTCATGCGCTTCAAGGTGCACATGGAGGGCTCCGTGAACGGC	1	35	Insertion and Deletion	0	0		22	MRFPSIFTAVLFAASSALAAS*											MRFPSIFTAVLFAASSALAASKKKKKASGVSKGEEDNMAIIKEFMRFKVHMEGSVNG	ATGAGATTTCCTTCAATTTTTACTGCTGTTTTATTCGCAGCATCCTCCGCATTAGCTGCTAGC------------TGACTCGATTGACCGGCAAGCGGTGTGAGCAAGGGCGAGGAGGATAACATGGCCATCATCAAGGAGTTCATGCGCTTCAAGGTGCACATGGAGGGCTCCGTGAACGGC	ATGAGATTTCCTTCAATTTTTACTGCTGTTTTATTCGCAGCATCCTCCGCATTAGCTGCTAGCAAAAAAAAAAAAAAAGCAAGCGGTGTGAGCAAGGGCGAGGAGGATAACATGGCCATCATCAAGGAGTTCATGCGCTTCAAGGTGCACATGGAGGGCTCCGTGAACGGC
ATGAGATTTCCTTCAATTTTTACTGCTGTTTTATTCGCAGCATCCTCCGCATTAGCTGCTAGC------------TGACtcgcgttgttggCAAGCGGTGTGAGCAAGGGCGAGGAGGATAACATGGCCATCATCAAGGAGTTCATGCGCTTCAAGGTGCACATGGAGGGCTCCGTGAACGGC	1	36	Insertion and Deletion	0	0		22	MRFPSIFTAVLFAASSALAAS*											MRFPSIFTAVLFAASSALAASKKKKKASGVSKGEEDNMAIIKEFMRFKVHMEGSVNG	ATGAGATTTCCTTCAATTTTTACTGCTGTTTTATTCGCAGCATCCTCCGCATTAGCTGCTAGC------------TGACTCGCGTTGTTGGCAAGCGGTGTGAGCAAGGGCGAGGAGGATAACATGGCCATCATCAAGGAGTTCATGCGCTTCAAGGTGCACATGGAGGGCTCCGTGAACGGC	ATGAGATTTCCTTCAATTTTTACTGCTGTTTTATTCGCAGCATCCTCCGCATTAGCTGCTAGCAAAAAAAAAAAAAAAGCAAGCGGTGTGAGCAAGGGCGAGGAGGATAACATGGCCATCATCAAGGAGTTCATGCGCTTCAAGGTGCACATGGAGGGCTCCGTGAACGGC
ATGAGATTTCCTTCAATTTTTACTGCTGTTTTATTCGCAGCATCCTCCGCATTAGCTGCTAGC------------TGACtcgttgggtttgCAAGCGGTGTGAGCAAGGGCGAGGAGGATAACATGGCCATCATCAAGGAGTTCATGCGCTTCAAGGTGCACATGGAGGGCTCCGTGAACGGC	1	35	Insertion and Deletion	0	0		22	MRFPSIFTAVLFAASSALAAS*											MRFPSIFTAVLFAASSALAASKKKKKASGVSKGEEDNMAIIKEFMRFKVHMEGSVNG	ATGAGATTTCCTTCAATTTTTACTGCTGTTTTATTCGCAGCATCCTCCGCATTAGCTGCTAGC------------TGACTCGTTGGGTTTGCAAGCGGTGTGAGCAAGGGCGAGGAGGATAACATGGCCATCATCAAGGAGTTCATGCGCTTCAAGGTGCACATGGAGGGCTCCGTGAACGGC	ATGAGATTTCCTTCAATTTTTACTGCTGTTTTATTCGCAGCATCCTCCGCATTAGCTGCTAGCAAAAAAAAAAAAAAAGCAAGCGGTGTGAGCAAGGGCGAGGAGGATAACATGGCCATCATCAAGGAGTTCATGCGCTTCAAGGTGCACATGGAGGGCTCCGTGAACGGC
ATGAGATTTCCTTCAATTTTTACTGCTGTTTTATTCGCAGCATCCTCCGCATTAGCTGCTAGC------------TGACtgggtgacggggCAAGCGGTGTGAGCAAGGGCGAGGAGGATAACATGGCCATCATCAAGGAGTTCATGCGCTTCAAGGTGCACATGGAGGGCTCCGTGAACGGC	1	35	Insertion and Deletion	0	0		22	MRFPSIFTAVLFAASSALAAS*											MRFPSIFTAVLFAASSALAASKKKKKASGVSKGEEDNMAIIKEFMRFKVHMEGSVNG	ATGAGATTTCCTTCAATTTTTACTGCTGTTTTATTCGCAGCATCCTCCGCATTAGCTGCTAGC------------TGACTGGGTGACGGGGCAAGCGGTGTGAGCAAGGGCGAGGAGGATAACATGGCCATCATCAAGGAGTTCATGCGCTTCAAGGTGCACATGGAGGGCTCCGTGAACGGC	ATGAGATTTCCTTCAATTTTTACTGCTGTTTTATTCGCAGCATCCTCCGCATTAGCTGCTAGCAAAAAAAAAAAAAAAGCAAGCGGTGTGAGCAAGGGCGAGGAGGATAACATGGCCATCATCAAGGAGTTCATGCGCTTCAAGGTGCACATGGAGGGCTCCGTGAACGGC
ATGAGATTTCCTTCAATTTTTACTGCTGTTTTATTCGCAGCATCCTCCGCATTAGCTGCTAGC------------TGACtgggtgacggggCAAGCGGTGTGAGCAAGGGTGAGGAGGATAACATGGCCATCATCAAGGAGTTCATGCGCTTCAAGGTGCACATGGAGGGCTCCGTGAACGGC	1	34	Insertion and Deletion	0	0		22	MRFPSIFTAVLFAASSALAAS*											MRFPSIFTAVLFAASSALAASKKKKKASGVSKGEEDNMAIIKEFMRFKVHMEGSVNG	ATGAGATTTCCTTCAATTTTTACTGCTGTTTTATTCGCAGCATCCTCCGCATTAGCTGCTAGC------------TGACTGGGTGACGGGGCAAGCGGTGTGAGCAAGGGTGAGGAGGATAACATGGCCATCATCAAGGAGTTCATGCGCTTCAAGGTGCACATGGAGGGCTCCGTGAACGGC	ATGAGATTTCCTTCAATTTTTACTGCTGTTTTATTCGCAGCATCCTCCGCATTAGCTGCTAGCAAAAAAAAAAAAAAAGCAAGCGGTGTGAGCAAGGGCGAGGAGGATAACATGGCCATCATCAAGGAGTTCATGCGCTTCAAGGTGCACATGGAGGGCTCCGTGAACGGC
ATGAGATTTCCTTCAATTTTTACTGCTGTTTTATTCGCAGCATCCTCCGCATTAGCTGCTAGC------------TGACtggtacgtgctgCAAGCGGTGTGAGCAAGGGCGAGGAGGATAACATGGCCATCATCAAGGAGTTCATGCGCTTCAAGGTGCACATGGAGGGCTCCGTGAACGGC	1	36	Insertion and Deletion	0	0		22	MRFPSIFTAVLFAASSALAAS*											MRFPSIFTAVLFAASSALAASKKKKKASGVSKGEEDNMAIIKEFMRFKVHMEGSVNG	ATGAGATTTCCTTCAATTTTTACTGCTGTTTTATTCGCAGCATCCTCCGCATTAGCTGCTAGC------------TGACTGGTACGTGCTGCAAGCGGTGTGAGCAAGGGCGAGGAGGATAACATGGCCATCATCAAGGAGTTCATGCGCTTCAAGGTGCACATGGAGGGCTCCGTGAACGGC	ATGAGATTTCCTTCAATTTTTACTGCTGTTTTATTCGCAGCATCCTCCGCATTAGCTGCTAGCAAAAAAAAAAAAAAAGCAAGCGGTGTGAGCAAGGGCGAGGAGGATAACATGGCCATCATCAAGGAGTTCATGCGCTTCAAGGTGCACATGGAGGGCTCCGTGAACGGC
ATGAGATTTCCTTCAATTTTTACTGCTGTTTTATTCGCAGCATCCTCCGCATTAGCTGCTAGC------------TGACttgtccagcgtgCAAGCGGTGTGAGCAAGGGCGAGGAGGATAACATGGCCATCATCAAGGAGTTCATGCGCTTCAAGGTGCACATGGAGGGCTCCGTGAACGGC	1	36	Insertion and Deletion	0	0		22	MRFPSIFTAVLFAASSALAAS*											MRFPSIFTAVLFAASSALAASKKKKKASGVSKGEEDNMAIIKEFMRFKVHMEGSVNG	ATGAGATTTCCTTCAATTTTTACTGCTGTTTTATTCGCAGCATCCTCCGCATTAGCTGCTAGC------------TGACTTGTCCAGCGTGCAAGCGGTGTGAGCAAGGGCGAGGAGGATAACATGGCCATCATCAAGGAGTTCATGCGCTTCAAGGTGCACATGGAGGGCTCCGTGAACGGC	ATGAGATTTCCTTCAATTTTTACTGCTGTTTTATTCGCAGCATCCTCCGCATTAGCTGCTAGCAAAAAAAAAAAAAAAGCAAGCGGTGTGAGCAAGGGCGAGGAGGATAACATGGCCATCATCAAGGAGTTCATGCGCTTCAAGGTGCACATGGAGGGCTCCGTGAACGGC
ATGAGATTTCCTTCAATTTTTACTGCTGTTTTATTCGCAGCATCCTCCGCATTAGCTGCTAGC------------TGACttgtctgaggggCAAGCGGTGTGAGCAAGGGCGAGGAGGATAACATGGCCATCATCAAGGAGTTCATGCGCTTCAAGGTGCACATGGAGGGCTCCGTGAACGGC	1	33	Insertion and Deletion	0	0		22	MRFPSIFTAVLFAASSALAAS*											MRFPSIFTAVLFAASSALAASKKKKKASGVSKGEEDNMAIIKEFMRFKVHMEGSVNG	ATGAGATTTCCTTCAATTTTTACTGCTGTTTTATTCGCAGCATCCTCCGCATTAGCTGCTAGC------------TGACTTGTCTGAGGGGCAAGCGGTGTGAGCAAGGGCGAGGAGGATAACATGGCCATCATCAAGGAGTTCATGCGCTTCAAGGTGCACATGGAGGGCTCCGTGAACGGC	ATGAGATTTCCTTCAATTTTTACTGCTGTTTTATTCGCAGCATCCTCCGCATTAGCTGCTAGCAAAAAAAAAAAAAAAGCAAGCGGTGTGAGCAAGGGCGAGGAGGATAACATGGCCATCATCAAGGAGTTCATGCGCTTCAAGGTGCACATGGAGGGCTCCGTGAACGGC
ATGAGATTTCCTTCAATTTTTACTGCTGTTTTATTCGCAGCATCCTCCGCATTAGCTGCTAGC------------TGAGcccccccatctgCAAGCGGTGTGAGCAAGGGCGAGGAGGATAACATGGCCATCATCAAGGAGTTCATGCGCTTCAAGGTGCACATGGAGGGCTCCGTGAACGGC	1	31	Insertion and Deletion	0	0		22	MRFPSIFTAVLFAASSALAAS*											MRFPSIFTAVLFAASSALAASKKKKKASGVSKGEEDNMAIIKEFMRFKVHMEGSVNG	ATGAGATTTCCTTCAATTTTTACTGCTGTTTTATTCGCAGCATCCTCCGCATTAGCTGCTAGC------------TGAGCCCCCCCATCTGCAAGCGGTGTGAGCAAGGGCGAGGAGGATAACATGGCCATCATCAAGGAGTTCATGCGCTTCAAGGTGCACATGGAGGGCTCCGTGAACGGC	ATGAGATTTCCTTCAATTTTTACTGCTGTTTTATTCGCAGCATCCTCCGCATTAGCTGCTAGCAAAAAAAAAAAAAAAGCAAGCGGTGTGAGCAAGGGCGAGGAGGATAACATGGCCATCATCAAGGAGTTCATGCGCTTCAAGGTGCACATGGAGGGCTCCGTGAACGGC
ATGAGATTTCCTTCAATTTTTACTGCTGTTTTATTCGCAGCATCCTCCGCATTAGCTGCTAGC------------TGAGgaggatcttttgCAAGCGGTGTGAGCAAGGGCGAGGAGGATAACATGGCCATCATCAAGGAGTTCATGCGCTTCAAGGTGCACATGGAGGGCTCCGTGAACGGC	1	36	Insertion and Deletion	0	0		22	MRFPSIFTAVLFAASSALAAS*											MRFPSIFTAVLFAASSALAASKKKKKASGVSKGEEDNMAIIKEFMRFKVHMEGSVNG	ATGAGATTTCCTTCAATTTTTACTGCTGTTTTATTCGCAGCATCCTCCGCATTAGCTGCTAGC------------TGAGGAGGATCTTTTGCAAGCGGTGTGAGCAAGGGCGAGGAGGATAACATGGCCATCATCAAGGAGTTCATGCGCTTCAAGGTGCACATGGAGGGCTCCGTGAACGGC	ATGAGATTTCCTTCAATTTTTACTGCTGTTTTATTCGCAGCATCCTCCGCATTAGCTGCTAGCAAAAAAAAAAAAAAAGCAAGCGGTGTGAGCAAGGGCGAGGAGGATAACATGGCCATCATCAAGGAGTTCATGCGCTTCAAGGTGCACATGGAGGGCTCCGTGAACGGC
ATGAGATTTCCTTCAATTTTTACTGCTGTTTTATTCGCAGCATCCTCCGCATTAGCTGCTAGC------------TGAGgatccggtcgtgCAAGCGGTGTGAGCAAGGGCGAGGAGGATAACATGGCCATCATCAAGGAGTTCATGCGCTTCAAGGTGCACATGGAGGGCTCCGTGAACGGC	1	36	Insertion and Deletion	0	0		22	MRFPSIFTAVLFAASSALAAS*											MRFPSIFTAVLFAASSALAASKKKKKASGVSKGEEDNMAIIKEFMRFKVHMEGSVNG	ATGAGATTTCCTTCAATTTTTACTGCTGTTTTATTCGCAGCATCCTCCGCATTAGCTGCTAGC------------TGAGGATCCGGTCGTGCAAGCGGTGTGAGCAAGGGCGAGGAGGATAACATGGCCATCATCAAGGAGTTCATGCGCTTCAAGGTGCACATGGAGGGCTCCGTGAACGGC	ATGAGATTTCCTTCAATTTTTACTGCTGTTTTATTCGCAGCATCCTCCGCATTAGCTGCTAGCAAAAAAAAAAAAAAAGCAAGCGGTGTGAGCAAGGGCGAGGAGGATAACATGGCCATCATCAAGGAGTTCATGCGCTTCAAGGTGCACATGGAGGGCTCCGTGAACGGC
ATGAGATTTCCTTCAATTTTTACTGCTGTTTTATTCGCAGCATCCTCCGCATTAGCTGCTAGC------------TGAGgatgttgtttggCAAGCGGTGTGAGCAAGGGCGAGGAGGATAACATGGCCATCATCAAGGAGTTCATGCGCTTCAAGGTGCACATGGAGGGCTCCGTGAACGGC	1	34	Insertion and Deletion	0	0		22	MRFPSIFTAVLFAASSALAAS*											MRFPSIFTAVLFAASSALAASKKKKKASGVSKGEEDNMAIIKEFMRFKVHMEGSVNG	ATGAGATTTCCTTCAATTTTTACTGCTGTTTTATTCGCAGCATCCTCCGCATTAGCTGCTAGC------------TGAGGATGTTGTTTGGCAAGCGGTGTGAGCAAGGGCGAGGAGGATAACATGGCCATCATCAAGGAGTTCATGCGCTTCAAGGTGCACATGGAGGGCTCCGTGAACGGC	ATGAGATTTCCTTCAATTTTTACTGCTGTTTTATTCGCAGCATCCTCCGCATTAGCTGCTAGCAAAAAAAAAAAAAAAGCAAGCGGTGTGAGCAAGGGCGAGGAGGATAACATGGCCATCATCAAGGAGTTCATGCGCTTCAAGGTGCACATGGAGGGCTCCGTGAACGGC
ATGAGATTTCCTTCAATTTTTACTGCTGTTTTATTCGCAGCATCCTCCGCATTAGCTGCTAGC------------TGAGgctggccggttgCAAGCGGTGTGAGCAAGGGCGAGGAGGATAACATGGCCATCATCAAGGAGTTCATGCGCTTCAAGGTGCACATGGAGGGCTCCGTGAACGGC	1	35	Insertion and Deletion	0	0		22	MRFPSIFTAVLFAASSALAAS*											MRFPSIFTAVLFAASSALAASKKKKKASGVSKGEEDNMAIIKEFMRFKVHMEGSVNG	ATGAGATTTCCTTCAATTTTTACTGCTGTTTTATTCGCAGCATCCTCCGCATTAGCTGCTAGC------------TGAGGCTGGCCGGTTGCAAGCGGTGTGAGCAAGGGCGAGGAGGATAACATGGCCATCATCAAGGAGTTCATGCGCTTCAAGGTGCACATGGAGGGCTCCGTGAACGGC	ATGAGATTTCCTTCAATTTTTACTGCTGTTTTATTCGCAGCATCCTCCGCATTAGCTGCTAGCAAAAAAAAAAAAAAAGCAAGCGGTGTGAGCAAGGGCGAGGAGGATAACATGGCCATCATCAAGGAGTTCATGCGCTTCAAGGTGCACATGGAGGGCTCCGTGAACGGC
ATGAGATTTCCTTCAATTTTTACTGCTGTTTTATTCGCAGCATCCTCCGCATTAGCTGCTAGC------------TGAGggattcaggtggCAAGCGGTGTGAGCAAGGGCGAGGAGGATAACATGGCCATCATCAAGGAGTTCATGCGCTTCAAGGTGCACATGGAGGGCTCCGTGAACGGC	1	32	Insertion and Deletion	0	0		22	MRFPSIFTAVLFAASSALAAS*											MRFPSIFTAVLFAASSALAASKKKKKASGVSKGEEDNMAIIKEFMRFKVHMEGSVNG	ATGAGATTTCCTTCAATTTTTACTGCTGTTTTATTCGCAGCATCCTCCGCATTAGCTGCTAGC------------TGAGGGATTCAGGTGGCAAGCGGTGTGAGCAAGGGCGAGGAGGATAACATGGCCATCATCAAGGAGTTCATGCGCTTCAAGGTGCACATGGAGGGCTCCGTGAACGGC	ATGAGATTTCCTTCAATTTTTACTGCTGTTTTATTCGCAGCATCCTCCGCATTAGCTGCTAGCAAAAAAAAAAAAAAAGCAAGCGGTGTGAGCAAGGGCGAGGAGGATAACATGGCCATCATCAAGGAGTTCATGCGCTTCAAGGTGCACATGGAGGGCTCCGTGAACGGC
ATGAGATTTCCTTCAATTTTTACTGCTGTTTTATTCGCAGCATCCTCCGCATTAGCTGCTAGC------------TGAGggcgccggctggCAAGCGGTGTGAGCAAGGGCGAGGAGGATAACATGGCCATCATCAAGGAGTTCATGCGCTTCAAGGTGCACATGGAGGGCTCCGTGAACGGC	1	35	Insertion and Deletion	0	0		22	MRFPSIFTAVLFAASSALAAS*											MRFPSIFTAVLFAASSALAASKKKKKASGVSKGEEDNMAIIKEFMRFKVHMEGSVNG	ATGAGATTTCCTTCAATTTTTACTGCTGTTTTATTCGCAGCATCCTCCGCATTAGCTGCTAGC------------TGAGGGCGCCGGCTGGCAAGCGGTGTGAGCAAGGGCGAGGAGGATAACATGGCCATCATCAAGGAGTTCATGCGCTTCAAGGTGCACATGGAGGGCTCCGTGAACGGC	ATGAGATTTCCTTCAATTTTTACTGCTGTTTTATTCGCAGCATCCTCCGCATTAGCTGCTAGCAAAAAAAAAAAAAAAGCAAGCGGTGTGAGCAAGGGCGAGGAGGATAACATGGCCATCATCAAGGAGTTCATGCGCTTCAAGGTGCACATGGAGGGCTCCGTGAACGGC
ATGAGATTTCCTTCAATTTTTACTGCTGTTTTATTCGCAGCATCCTCCGCATTAGCTGCTAGC------------TGAGggctgtccggtgCAAGCGGTGTGAGCAAGGGCGAGGAGGATAACATGGCCATCATCAAGGAGTTCATGCGCTTCAAGGTGCACATGGAGGGCTCCGTGAACGGC	1	35	Insertion and Deletion	0	0		22	MRFPSIFTAVLFAASSALAAS*											MRFPSIFTAVLFAASSALAASKKKKKASGVSKGEEDNMAIIKEFMRFKVHMEGSVNG	ATGAGATTTCCTTCAATTTTTACTGCTGTTTTATTCGCAGCATCCTCCGCATTAGCTGCTAGC------------TGAGGGCTGTCCGGTGCAAGCGGTGTGAGCAAGGGCGAGGAGGATAACATGGCCATCATCAAGGAGTTCATGCGCTTCAAGGTGCACATGGAGGGCTCCGTGAACGGC	ATGAGATTTCCTTCAATTTTTACTGCTGTTTTATTCGCAGCATCCTCCGCATTAGCTGCTAGCAAAAAAAAAAAAAAAGCAAGCGGTGTGAGCAAGGGCGAGGAGGATAACATGGCCATCATCAAGGAGTTCATGCGCTTCAAGGTGCACATGGAGGGCTCCGTGAACGGC
ATGAGATTTCCTTCAATTTTTACTGCTGTTTTATTCGCAGCATCCTCCGCATTAGCTGCTAGC------------TGAGggggggtctgtgCAAGCGGTGTGAGCAAGGGCGAGGAGGATAACATGGCCATCATCAAGGAGTTCATGCGCTTCAAGGTGCACATGGAGGGCTCCGTGAACGGC	1	22	Insertion and Deletion	0	0		22	MRFPSIFTAVLFAASSALAAS*											MRFPSIFTAVLFAASSALAASKKKKKASGVSKGEEDNMAIIKEFMRFKVHMEGSVNG	ATGAGATTTCCTTCAATTTTTACTGCTGTTTTATTCGCAGCATCCTCCGCATTAGCTGCTAGC------------TGAGGGGGGGTCTGTGCAAGCGGTGTGAGCAAGGGCGAGGAGGATAACATGGCCATCATCAAGGAGTTCATGCGCTTCAAGGTGCACATGGAGGGCTCCGTGAACGGC	ATGAGATTTCCTTCAATTTTTACTGCTGTTTTATTCGCAGCATCCTCCGCATTAGCTGCTAGCAAAAAAAAAAAAAAAGCAAGCGGTGTGAGCAAGGGCGAGGAGGATAACATGGCCATCATCAAGGAGTTCATGCGCTTCAAGGTGCACATGGAGGGCTCCGTGAACGGC
ATGAGATTTCCTTCAATTTTTACTGCTGTTTTATTCGCAGCATCCTCCGCATTAGCTGCTAGC------------TGAGgtggctcccgtgCAAGCGGTGTGAGCAAGGGCGAGGAGGATAACATGGCCATCATCAAGGAGTTCATGCGCTTCAAGGTGCACATGGAGGGCTCCGTGAACGGC	1	36	Insertion and Deletion	0	0		22	MRFPSIFTAVLFAASSALAAS*											MRFPSIFTAVLFAASSALAASKKKKKASGVSKGEEDNMAIIKEFMRFKVHMEGSVNG	ATGAGATTTCCTTCAATTTTTACTGCTGTTTTATTCGCAGCATCCTCCGCATTAGCTGCTAGC------------TGAGGTGGCTCCCGTGCAAGCGGTGTGAGCAAGGGCGAGGAGGATAACATGGCCATCATCAAGGAGTTCATGCGCTTCAAGGTGCACATGGAGGGCTCCGTGAACGGC	ATGAGATTTCCTTCAATTTTTACTGCTGTTTTATTCGCAGCATCCTCCGCATTAGCTGCTAGCAAAAAAAAAAAAAAAGCAAGCGGTGTGAGCAAGGGCGAGGAGGATAACATGGCCATCATCAAGGAGTTCATGCGCTTCAAGGTGCACATGGAGGGCTCCGTGAACGGC
ATGAGATTTCCTTCAATTTTTACTGCTGTTTTATTCGCAGCATCCTCCGCATTAGCTGCTAGC------------TGAGgtgtatggggggCAAGCGGTGTGAGCAAGGGCGAGGAGGATAACATGGCCATCATCAAGGAGTTCATGCGCTTCAAGGTGCACATGGAGGGCTCCGTGAACGGC	1	35	Insertion and Deletion	0	0		22	MRFPSIFTAVLFAASSALAAS*											MRFPSIFTAVLFAASSALAASKKKKKASGVSKGEEDNMAIIKEFMRFKVHMEGSVNG	ATGAGATTTCCTTCAATTTTTACTGCTGTTTTATTCGCAGCATCCTCCGCATTAGCTGCTAGC------------TGAGGTGTATGGGGGGCAAGCGGTGTGAGCAAGGGCGAGGAGGATAACATGGCCATCATCAAGGAGTTCATGCGCTTCAAGGTGCACATGGAGGGCTCCGTGAACGGC	ATGAGATTTCCTTCAATTTTTACTGCTGTTTTATTCGCAGCATCCTCCGCATTAGCTGCTAGCAAAAAAAAAAAAAAAGCAAGCGGTGTGAGCAAGGGCGAGGAGGATAACATGGCCATCATCAAGGAGTTCATGCGCTTCAAGGTGCACATGGAGGGCTCCGTGAACGGC
ATGAGATTTCCTTCAATTTTTACTGCTGTTTTATTCGCAGCATCCTCCGCATTAGCTGCTAGC------------TGAGgtgttttttgtgCAAGCGGTGTGAGCAAGGGCGAGGAGGATAACATGGCCATCATCAAGGAGTTCATGCGCTTCAAGGTGCACATGGAGGGCTCCGTGAACGGC	1	32	Insertion and Deletion	0	0		22	MRFPSIFTAVLFAASSALAAS*											MRFPSIFTAVLFAASSALAASKKKKKASGVSKGEEDNMAIIKEFMRFKVHMEGSVNG	ATGAGATTTCCTTCAATTTTTACTGCTGTTTTATTCGCAGCATCCTCCGCATTAGCTGCTAGC------------TGAGGTGTTTTTTGTGCAAGCGGTGTGAGCAAGGGCGAGGAGGATAACATGGCCATCATCAAGGAGTTCATGCGCTTCAAGGTGCACATGGAGGGCTCCGTGAACGGC	ATGAGATTTCCTTCAATTTTTACTGCTGTTTTATTCGCAGCATCCTCCGCATTAGCTGCTAGCAAAAAAAAAAAAAAAGCAAGCGGTGTGAGCAAGGGCGAGGAGGATAACATGGCCATCATCAAGGAGTTCATGCGCTTCAAGGTGCACATGGAGGGCTCCGTGAACGGC
ATGAGATTTCCTTCAATTTTTACTGCTGTTTTATTCGCAGCATCCTCCGCATTAGCTGCTAGC------------TGAGtagtattgctggCAAGCGGTGTGAGCAAGGGCGAGGAGGATAACATGGCCATCATCAAGGAGTTCATGCGCTTCAAGGTGCACATGGAGGGCTCCGTGAACGGC	1	36	Insertion and Deletion	0	0		22	MRFPSIFTAVLFAASSALAAS*											MRFPSIFTAVLFAASSALAASKKKKKASGVSKGEEDNMAIIKEFMRFKVHMEGSVNG	ATGAGATTTCCTTCAATTTTTACTGCTGTTTTATTCGCAGCATCCTCCGCATTAGCTGCTAGC------------TGAGTAGTATTGCTGGCAAGCGGTGTGAGCAAGGGCGAGGAGGATAACATGGCCATCATCAAGGAGTTCATGCGCTTCAAGGTGCACATGGAGGGCTCCGTGAACGGC	ATGAGATTTCCTTCAATTTTTACTGCTGTTTTATTCGCAGCATCCTCCGCATTAGCTGCTAGCAAAAAAAAAAAAAAAGCAAGCGGTGTGAGCAAGGGCGAGGAGGATAACATGGCCATCATCAAGGAGTTCATGCGCTTCAAGGTGCACATGGAGGGCTCCGTGAACGGC
ATGAGATTTCCTTCAATTTTTACTGCTGTTTTATTCGCAGCATCCTCCGCATTAGCTGCTAGC------------TGAGtccgatggtgtgCAAGCGGTGTGAGCAAGGGCGAGGAGGATAACATGGCCATCATCAAGGAGTTCATGCGCTTCAAGGTGCACATGGAGGGCTCCGTGAACGGC	1	35	Insertion and Deletion	0	0		22	MRFPSIFTAVLFAASSALAAS*											MRFPSIFTAVLFAASSALAASKKKKKASGVSKGEEDNMAIIKEFMRFKVHMEGSVNG	ATGAGATTTCCTTCAATTTTTACTGCTGTTTTATTCGCAGCATCCTCCGCATTAGCTGCTAGC------------TGAGTCCGATGGTGTGCAAGCGGTGTGAGCAAGGGCGAGGAGGATAACATGGCCATCATCAAGGAGTTCATGCGCTTCAAGGTGCACATGGAGGGCTCCGTGAACGGC	ATGAGATTTCCTTCAATTTTTACTGCTGTTTTATTCGCAGCATCCTCCGCATTAGCTGCTAGCAAAAAAAAAAAAAAAGCAAGCGGTGTGAGCAAGGGCGAGGAGGATAACATGGCCATCATCAAGGAGTTCATGCGCTTCAAGGTGCACATGGAGGGCTCCGTGAACGGC
ATGAGATTTCCTTCAATTTTTACTGCTGTTTTATTCGCAGCATCCTCCGCATTAGCTGCTAGC------------TGAGtctactgaggtgCAAGCGGTGTGAGCAAGGGCGAGGAGGATAACATGGCCATCATCAAGGAGTTCATGCGCTTCAAGGTGCACATGGAGGGCTCCGTGAACGGC	1	35	Insertion and Deletion	0	0		22	MRFPSIFTAVLFAASSALAAS*											MRFPSIFTAVLFAASSALAASKKKKKASGVSKGEEDNMAIIKEFMRFKVHMEGSVNG	ATGAGATTTCCTTCAATTTTTACTGCTGTTTTATTCGCAGCATCCTCCGCATTAGCTGCTAGC------------TGAGTCTACTGAGGTGCAAGCGGTGTGAGCAAGGGCGAGGAGGATAACATGGCCATCATCAAGGAGTTCATGCGCTTCAAGGTGCACATGGAGGGCTCCGTGAACGGC	ATGAGATTTCCTTCAATTTTTACTGCTGTTTTATTCGCAGCATCCTCCGCATTAGCTGCTAGCAAAAAAAAAAAAAAAGCAAGCGGTGTGAGCAAGGGCGAGGAGGATAACATGGCCATCATCAAGGAGTTCATGCGCTTCAAGGTGCACATGGAGGGCTCCGTGAACGGC
ATGAGATTTCCTTCAATTTTTACTGCTGTTTTATTCGCAGCATCCTCCGCATTAGCTGCTAGC------------TGAGtctactgatgggCAAGCGGTGTGAGCAAGGGCGAGGAGGATAACATGGCCATCATCAAGGAGTTCATGCGCTTCAAGGTGCACATGGAGGGCTCCGTGAACGGC	1	35	Insertion and Deletion	0	0		22	MRFPSIFTAVLFAASSALAAS*											MRFPSIFTAVLFAASSALAASKKKKKASGVSKGEEDNMAIIKEFMRFKVHMEGSVNG	ATGAGATTTCCTTCAATTTTTACTGCTGTTTTATTCGCAGCATCCTCCGCATTAGCTGCTAGC------------TGAGTCTACTGATGGGCAAGCGGTGTGAGCAAGGGCGAGGAGGATAACATGGCCATCATCAAGGAGTTCATGCGCTTCAAGGTGCACATGGAGGGCTCCGTGAACGGC	ATGAGATTTCCTTCAATTTTTACTGCTGTTTTATTCGCAGCATCCTCCGCATTAGCTGCTAGCAAAAAAAAAAAAAAAGCAAGCGGTGTGAGCAAGGGCGAGGAGGATAACATGGCCATCATCAAGGAGTTCATGCGCTTCAAGGTGCACATGGAGGGCTCCGTGAACGGC
ATGAGATTTCCTTCAATTTTTACTGCTGTTTTATTCGCAGCATCCTCCGCATTAGCTGCTAGC------------TGAGtctttttatctgCAAGCGGTGTGAGCAAGGGCGAGGAGGATAACATGGCCATCATCAAGGAGTTCATGCGCTTCAAGGTGCACATGGAGGGCTCCGTGAACGGC	1	35	Insertion and Deletion	0	0		22	MRFPSIFTAVLFAASSALAAS*											MRFPSIFTAVLFAASSALAASKKKKKASGVSKGEEDNMAIIKEFMRFKVHMEGSVNG	ATGAGATTTCCTTCAATTTTTACTGCTGTTTTATTCGCAGCATCCTCCGCATTAGCTGCTAGC------------TGAGTCTTTTTATCTGCAAGCGGTGTGAGCAAGGGCGAGGAGGATAACATGGCCATCATCAAGGAGTTCATGCGCTTCAAGGTGCACATGGAGGGCTCCGTGAACGGC	ATGAGATTTCCTTCAATTTTTACTGCTGTTTTATTCGCAGCATCCTCCGCATTAGCTGCTAGCAAAAAAAAAAAAAAAGCAAGCGGTGTGAGCAAGGGCGAGGAGGATAACATGGCCATCATCAAGGAGTTCATGCGCTTCAAGGTGCACATGGAGGGCTCCGTGAACGGC
ATGAGATTTCCTTCAATTTTTACTGCTGTTTTATTCGCAGCATCCTCCGCATTAGCTGCTAGC------------TGAGtgaggtattgggCAAGCGGTGTGAGCAAGGGCGAGGAGGATAACATGGCCATCATCAAGGAGTTCATGCGCTTCAAGGTGCACATGGAGGGCTCCGTGAACGGC	1	33	Insertion and Deletion	0	0		22	MRFPSIFTAVLFAASSALAAS*											MRFPSIFTAVLFAASSALAASKKKKKASGVSKGEEDNMAIIKEFMRFKVHMEGSVNG	ATGAGATTTCCTTCAATTTTTACTGCTGTTTTATTCGCAGCATCCTCCGCATTAGCTGCTAGC------------TGAGTGAGGTATTGGGCAAGCGGTGTGAGCAAGGGCGAGGAGGATAACATGGCCATCATCAAGGAGTTCATGCGCTTCAAGGTGCACATGGAGGGCTCCGTGAACGGC	ATGAGATTTCCTTCAATTTTTACTGCTGTTTTATTCGCAGCATCCTCCGCATTAGCTGCTAGCAAAAAAAAAAAAAAAGCAAGCGGTGTGAGCAAGGGCGAGGAGGATAACATGGCCATCATCAAGGAGTTCATGCGCTTCAAGGTGCACATGGAGGGCTCCGTGAACGGC
ATGAGATTTCCTTCAATTTTTACTGCTGTTTTATTCGCAGCATCCTCCGCATTAGCTGCTAGC------------TGAGtgcttcgcctggCAAGCGGTGTGAGCAAGGGCGAGGAGGATAACATGGCCATCATCAAGGAGTTCATGCGCTTCAAGGTGCACATGGAGGGCTCCGTGAACGGC	1	35	Insertion and Deletion	0	0		22	MRFPSIFTAVLFAASSALAAS*											MRFPSIFTAVLFAASSALAASKKKKKASGVSKGEEDNMAIIKEFMRFKVHMEGSVNG	ATGAGATTTCCTTCAATTTTTACTGCTGTTTTATTCGCAGCATCCTCCGCATTAGCTGCTAGC------------TGAGTGCTTCGCCTGGCAAGCGGTGTGAGCAAGGGCGAGGAGGATAACATGGCCATCATCAAGGAGTTCATGCGCTTCAAGGTGCACATGGAGGGCTCCGTGAACGGC	ATGAGATTTCCTTCAATTTTTACTGCTGTTTTATTCGCAGCATCCTCCGCATTAGCTGCTAGCAAAAAAAAAAAAAAAGCAAGCGGTGTGAGCAAGGGCGAGGAGGATAACATGGCCATCATCAAGGAGTTCATGCGCTTCAAGGTGCACATGGAGGGCTCCGTGAACGGC
ATGAGATTTCCTTCAATTTTTACTGCTGTTTTATTCGCAGCATCCTCCGCATTAGCTGCTAGC------------TGAGtggcagtccttgCAAGCGGTGTGAGCAAGGGCGAGGAGGATAACATGGCCATCATCAAGGAGTTCATGCGCTTCAAGGTGCACATGGAGGGCTCCGTGAACGGC	1	33	Insertion and Deletion	0	0		22	MRFPSIFTAVLFAASSALAAS*											MRFPSIFTAVLFAASSALAASKKKKKASGVSKGEEDNMAIIKEFMRFKVHMEGSVNG	ATGAGATTTCCTTCAATTTTTACTGCTGTTTTATTCGCAGCATCCTCCGCATTAGCTGCTAGC------------TGAGTGGCAGTCCTTGCAAGCGGTGTGAGCAAGGGCGAGGAGGATAACATGGCCATCATCAAGGAGTTCATGCGCTTCAAGGTGCACATGGAGGGCTCCGTGAACGGC	ATGAGATTTCCTTCAATTTTTACTGCTGTTTTATTCGCAGCATCCTCCGCATTAGCTGCTAGCAAAAAAAAAAAAAAAGCAAGCGGTGTGAGCAAGGGCGAGGAGGATAACATGGCCATCATCAAGGAGTTCATGCGCTTCAAGGTGCACATGGAGGGCTCCGTGAACGGC
ATGAGATTTCCTTCAATTTTTACTGCTGTTTTATTCGCAGCATCCTCCGCATTAGCTGCTAGC------------TGAGtgtatgtttcggCAAGCGGTGTGAGCAAGGGCGAGGAGGATAACATGGCCATCATCAAGGAGTTCATGCGCTTCAAGGTGCACATGGAGGGCTCCGTGAACGGC	1	33	Insertion and Deletion	0	0		22	MRFPSIFTAVLFAASSALAAS*											MRFPSIFTAVLFAASSALAASKKKKKASGVSKGEEDNMAIIKEFMRFKVHMEGSVNG	ATGAGATTTCCTTCAATTTTTACTGCTGTTTTATTCGCAGCATCCTCCGCATTAGCTGCTAGC------------TGAGTGTATGTTTCGGCAAGCGGTGTGAGCAAGGGCGAGGAGGATAACATGGCCATCATCAAGGAGTTCATGCGCTTCAAGGTGCACATGGAGGGCTCCGTGAACGGC	ATGAGATTTCCTTCAATTTTTACTGCTGTTTTATTCGCAGCATCCTCCGCATTAGCTGCTAGCAAAAAAAAAAAAAAAGCAAGCGGTGTGAGCAAGGGCGAGGAGGATAACATGGCCATCATCAAGGAGTTCATGCGCTTCAAGGTGCACATGGAGGGCTCCGTGAACGGC
ATGAGATTTCCTTCAATTTTTACTGCTGTTTTATTCGCAGCATCCTCCGCATTAGCTGCTAGC------------TGAGttggttgtttggCAAGCGGTGTGAGCAAGGGCGAGGAGGATAACATGGCCATCATCAAGGAGTTCATGCGCTTCAAGGTGCACATGGAGGGCTCCGTGAACGGC	1	35	Insertion and Deletion	0	0		22	MRFPSIFTAVLFAASSALAAS*											MRFPSIFTAVLFAASSALAASKKKKKASGVSKGEEDNMAIIKEFMRFKVHMEGSVNG	ATGAGATTTCCTTCAATTTTTACTGCTGTTTTATTCGCAGCATCCTCCGCATTAGCTGCTAGC------------TGAGTTGGTTGTTTGGCAAGCGGTGTGAGCAAGGGCGAGGAGGATAACATGGCCATCATCAAGGAGTTCATGCGCTTCAAGGTGCACATGGAGGGCTCCGTGAACGGC	ATGAGATTTCCTTCAATTTTTACTGCTGTTTTATTCGCAGCATCCTCCGCATTAGCTGCTAGCAAAAAAAAAAAAAAAGCAAGCGGTGTGAGCAAGGGCGAGGAGGATAACATGGCCATCATCAAGGAGTTCATGCGCTTCAAGGTGCACATGGAGGGCTCCGTGAACGGC
ATGAGATTTCCTTCAATTTTTACTGCTGTTTTATTCGCAGCATCCTCCGCATTAGCTGCTAGC------------TGAGttgtcctccgggCAAGCGGTGTGAGCAAGGGCGAGGAGGATAACATGGCCATCATCAAGGAGTTCATGCGCTTCAAGGTGCACATGGAGGGCTCCGTGAACGGC	1	31	Insertion and Deletion	0	0		22	MRFPSIFTAVLFAASSALAAS*											MRFPSIFTAVLFAASSALAASKKKKKASGVSKGEEDNMAIIKEFMRFKVHMEGSVNG	ATGAGATTTCCTTCAATTTTTACTGCTGTTTTATTCGCAGCATCCTCCGCATTAGCTGCTAGC------------TGAGTTGTCCTCCGGGCAAGCGGTGTGAGCAAGGGCGAGGAGGATAACATGGCCATCATCAAGGAGTTCATGCGCTTCAAGGTGCACATGGAGGGCTCCGTGAACGGC	ATGAGATTTCCTTCAATTTTTACTGCTGTTTTATTCGCAGCATCCTCCGCATTAGCTGCTAGCAAAAAAAAAAAAAAAGCAAGCGGTGTGAGCAAGGGCGAGGAGGATAACATGGCCATCATCAAGGAGTTCATGCGCTTCAAGGTGCACATGGAGGGCTCCGTGAACGGC
ATGAGATTTCCTTCAATTTTTACTGCTGTTTTATTCGCAGCATCCTCCGCATTAGCTGCTAGC------------TGATcaggctggggggCAAGCGGTGTGAGCAAGGGCGAGGAGGATAACATGGCCATCATCAAGGAGTTCATGCGCTTCAAGGTGCACATGGAGGGCTCCGTGAACGGC	1	35	Insertion and Deletion	0	0		22	MRFPSIFTAVLFAASSALAAS*											MRFPSIFTAVLFAASSALAASKKKKKASGVSKGEEDNMAIIKEFMRFKVHMEGSVNG	ATGAGATTTCCTTCAATTTTTACTGCTGTTTTATTCGCAGCATCCTCCGCATTAGCTGCTAGC------------TGATCAGGCTGGGGGGCAAGCGGTGTGAGCAAGGGCGAGGAGGATAACATGGCCATCATCAAGGAGTTCATGCGCTTCAAGGTGCACATGGAGGGCTCCGTGAACGGC	ATGAGATTTCCTTCAATTTTTACTGCTGTTTTATTCGCAGCATCCTCCGCATTAGCTGCTAGCAAAAAAAAAAAAAAAGCAAGCGGTGTGAGCAAGGGCGAGGAGGATAACATGGCCATCATCAAGGAGTTCATGCGCTTCAAGGTGCACATGGAGGGCTCCGTGAACGGC
ATGAGATTTCCTTCAATTTTTACTGCTGTTTTATTCGCAGCATCCTCCGCATTAGCTGCTAGC------------TGATcattgttgcttgCAAGCGGTGTGAGCAAGGGCGAGGAGGATAACATGGCCATCATCAAGGAGTTCATGCGCTTCAAGGTGCACATGGAGGGCTCCGTGAACGGC	1	35	Insertion and Deletion	0	0		22	MRFPSIFTAVLFAASSALAAS*											MRFPSIFTAVLFAASSALAASKKKKKASGVSKGEEDNMAIIKEFMRFKVHMEGSVNG	ATGAGATTTCCTTCAATTTTTACTGCTGTTTTATTCGCAGCATCCTCCGCATTAGCTGCTAGC------------TGATCATTGTTGCTTGCAAGCGGTGTGAGCAAGGGCGAGGAGGATAACATGGCCATCATCAAGGAGTTCATGCGCTTCAAGGTGCACATGGAGGGCTCCGTGAACGGC	ATGAGATTTCCTTCAATTTTTACTGCTGTTTTATTCGCAGCATCCTCCGCATTAGCTGCTAGCAAAAAAAAAAAAAAAGCAAGCGGTGTGAGCAAGGGCGAGGAGGATAACATGGCCATCATCAAGGAGTTCATGCGCTTCAAGGTGCACATGGAGGGCTCCGTGAACGGC
ATGAGATTTCCTTCAATTTTTACTGCTGTTTTATTCGCAGCATCCTCCGCATTAGCTGCTAGC------------TGATccccagcttcggCAAGCGGTGTGAGCAAGGGCGAGGAGGATAACATGGCCATCATCAAGGAGTTCATGCGCTTCAAGGTGCACATGGAGGGCTCCGTGAACGGC	1	34	Insertion and Deletion	0	0		22	MRFPSIFTAVLFAASSALAAS*											MRFPSIFTAVLFAASSALAASKKKKKASGVSKGEEDNMAIIKEFMRFKVHMEGSVNG	ATGAGATTTCCTTCAATTTTTACTGCTGTTTTATTCGCAGCATCCTCCGCATTAGCTGCTAGC------------TGATCCCCAGCTTCGGCAAGCGGTGTGAGCAAGGGCGAGGAGGATAACATGGCCATCATCAAGGAGTTCATGCGCTTCAAGGTGCACATGGAGGGCTCCGTGAACGGC	ATGAGATTTCCTTCAATTTTTACTGCTGTTTTATTCGCAGCATCCTCCGCATTAGCTGCTAGCAAAAAAAAAAAAAAAGCAAGCGGTGTGAGCAAGGGCGAGGAGGATAACATGGCCATCATCAAGGAGTTCATGCGCTTCAAGGTGCACATGGAGGGCTCCGTGAACGGC
[truncated: 41,984 more rows]

## Sheet: Unstable bin
TargetSequence	Reads	AvgQScore	Type	Pct	IndelLength	# of AA translated	TargetAA	AA sequence starting from 5AA	5AA sequence	Position 1-4 AA	Position 2-5 AA	Pos 3 and 4 AA	1st position AA	2nd position AA	3rd position AA	4th position AA	5th position AA	ReferenceAA	WideTargetSeq	WideReference	TargetLeftFlank	TargetRightFlank
[truncated: 93,087 more rows]

[truncated: 1 more sheets: AA analysis]
