# Supplementary material for: Identification of ERAD-dependent degrons for the endoplasmic reticulum lumen
Source: eLife. 2024 Nov 12;12:RP89606. doi: 10.7554/eLife.89606 (PMC11556787; doi:10.7554/eLife.89606)
Supplement: Supplementary file 1. [file elife-89606-supp1.xlsx]

## Sheet: Supplementary File 1 - Strains
Strain number	Strain name	Genotype	Source
	BY4741	MATa his3Δ1 leu2Δ0 met15Δ0 ura3Δ0	GE Dharmacon
	BY4742	MATalpha his3Δ1 leu2Δ0 lys2Δ0 ura3Δ0	GE Dharmacon
	der1Δ	MATa his3Δ1 leu2Δ0 met15Δ0 ura3Δ0 der1::kanR	GE Dharmacon
	doa10Δ	MATa his3Δ1 leu2Δ0 met15Δ0 ura3Δ0 doa10::kanR	GE Dharmacon
	hrd1Δ	MATa his3Δ1 leu2Δ0 met15Δ0 ura3Δ0 hrd1::kanR	GE Dharmacon
	hrd3Δ	MATa his3Δ1 leu2Δ0 met15Δ0 ura3Δ0 hrd3::kanR	GE Dharmacon
	pdr5Δ	MATa his3Δ1 leu2Δ0 met15Δ0 ura3Δ0 pdr5::kanR	GE Dharmacon
	ubc7Δ	MATa his3Δ1 leu2Δ0 met15Δ0 ura3Δ0 ubc7::kanR	GE Dharmacon
	usa1Δ	MATa his3Δ1 leu2Δ0 met15Δ0 ura3Δ0 usa1::kanR	GE Dharmacon
	yos9Δ	MATa his3Δ1 leu2Δ0 met15Δ0 ura3Δ0 yos9::kanR	GE Dharmacon
JHY41A	hrd1Δpdr5Δ	MAT? his3Δ1 leu2Δ0 MET15? LYS2? ura3Δ0 hrd1::kanR pdr5::kanR	Hwang et al., 2023
