# Supplementary material for: Identification of ERAD-dependent degrons for the endoplasmic reticulum lumen
Source: eLife. 2024 Nov 12;12:RP89606. doi: 10.7554/eLife.89606 (PMC11556787; doi:10.7554/eLife.89606)
Supplement: Supplementary file 3. [file elife-89606-supp3.xlsx]

## Sheet: Supplementary File 3 - Primers
Primer	Description	Sequence
prRP07	GPD 3000 Fw	gagcccgctttttaagctgg
prRP08	mCherry 4022 Rev	cttcagggcgccgtcc
prRP09	5AA library Fw	CCTCCGCATTAGCTGCTAGCnnnnnnnnnnnnnnngcaagcggtGTGAGCAAG
prRP10	5AA library Rev	CTTGCTCACaccgcttgcnnnnnnnnnnnnnnnGCTAGCAGCTAATGCGGAGG
prRP29	Fw primer for library amplification (-500 bp/in GPD promoter)	GAATCCCAGCACCAAA
prRP37	5AA Seq Fw	ACACTCTTTCCCTACACGACGCTCTTCCGATCTCACCAGAACTTAGTTTCGACG
prRP38	5AA Seq Rev	GACTGGAGTTCAGACGTGTGCTCTTCCGATCTctcgatctcgaactcgtg
prRP51	Rev primer for library amplification (+100 bp/in mCherry)	ctcgatctcgaactcgtg
