# Supplementary figures and images for: Identification of ERAD-dependent degrons for the endoplasmic reticulum lumen
Source: eLife journal article supplement (doi:10.7554/elife.89606), 2023-09-05

Figure 1. Identification of endoplasmic reticulum localized degrons.

B

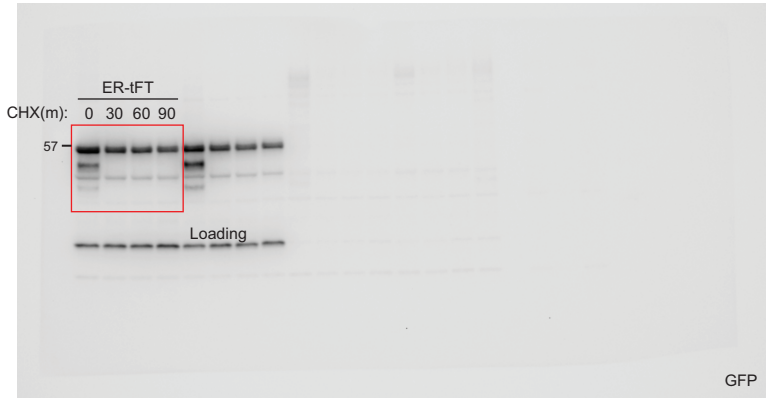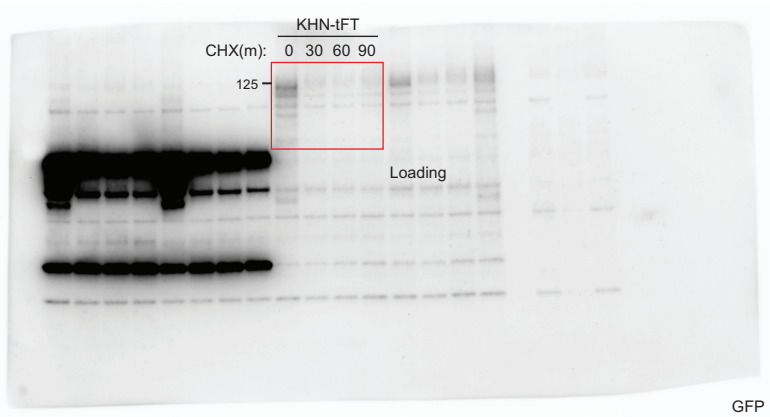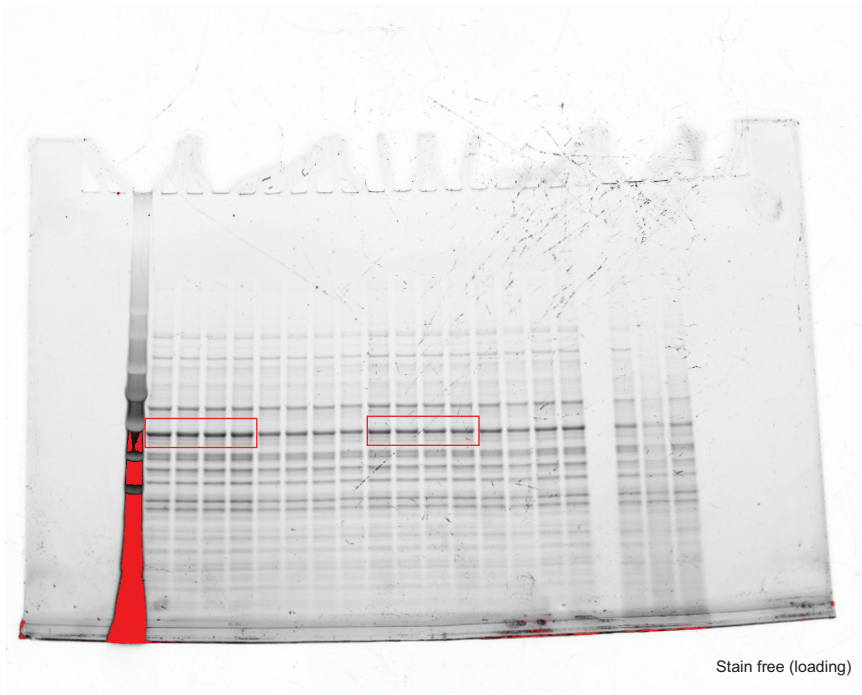

Supplement: fig1-data1 [file elife-89606-fig1-data1-v1.zip]

Figure 2-figure supplement 1

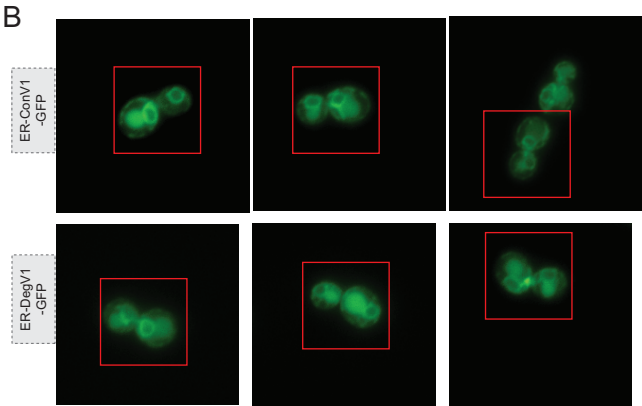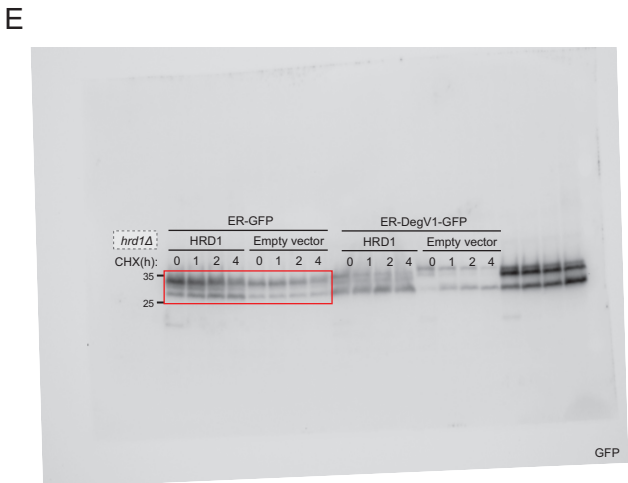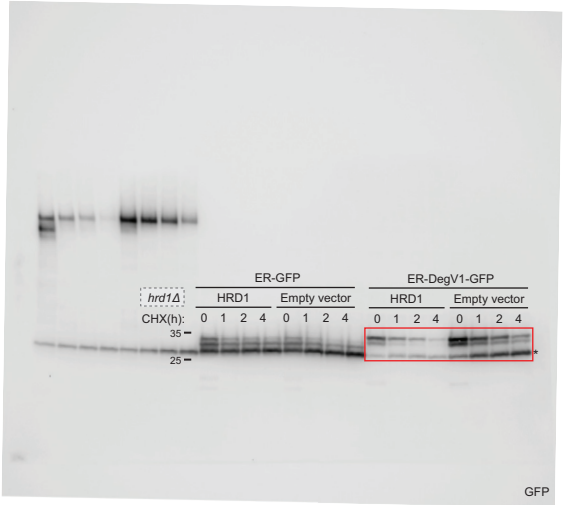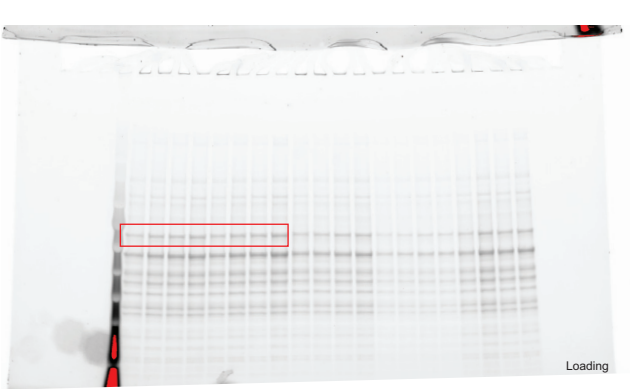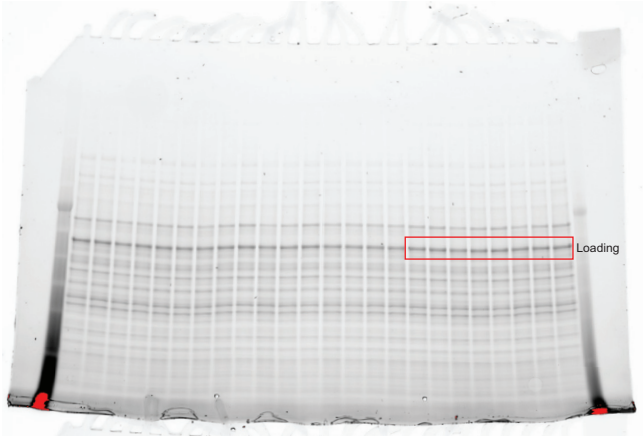

Figure 2-figure supplement 1

F

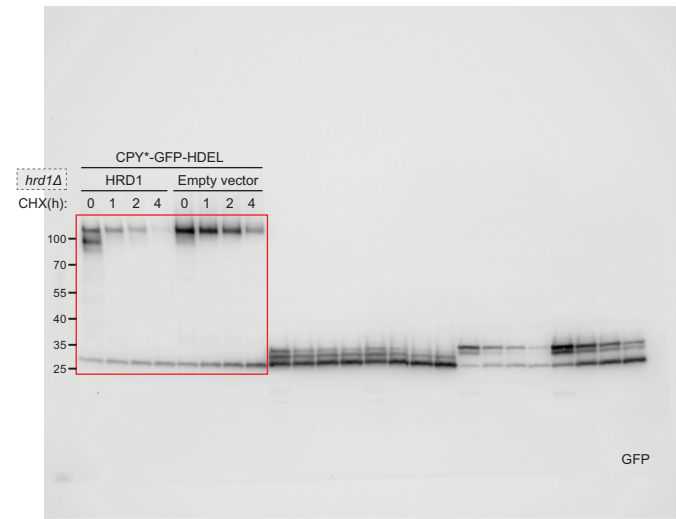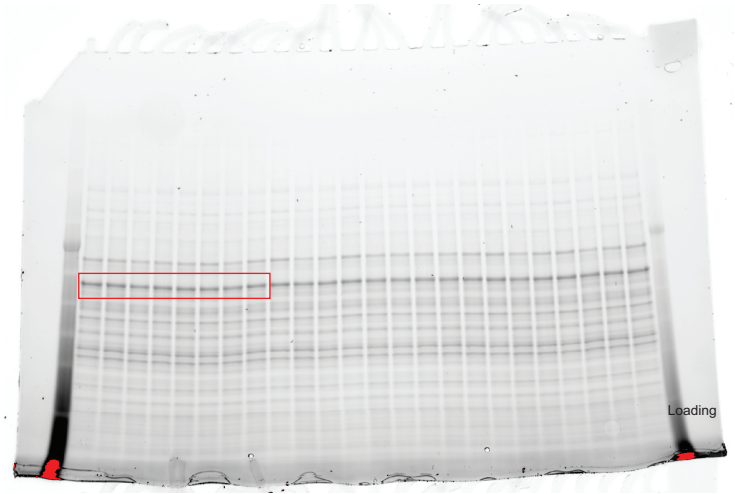

Figure 2-figure supplement 1

G

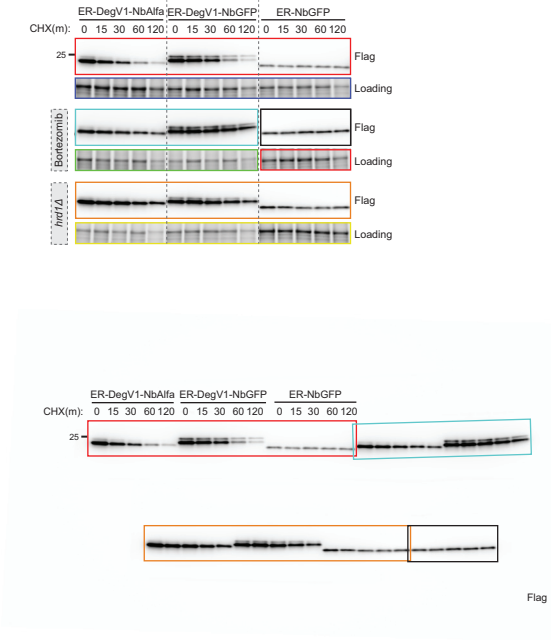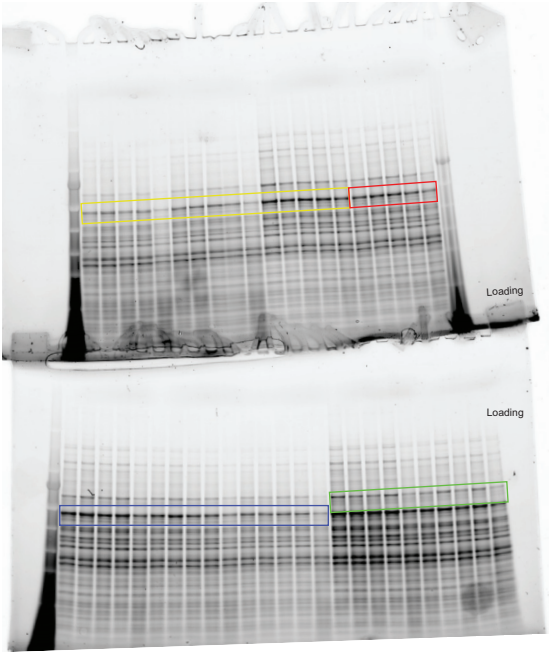

Supplement: fig2-figsupp1-data1 [file elife-89606-fig2-figsupp1-data1-v1.zip]

Figure 2-figure supplement 2

A

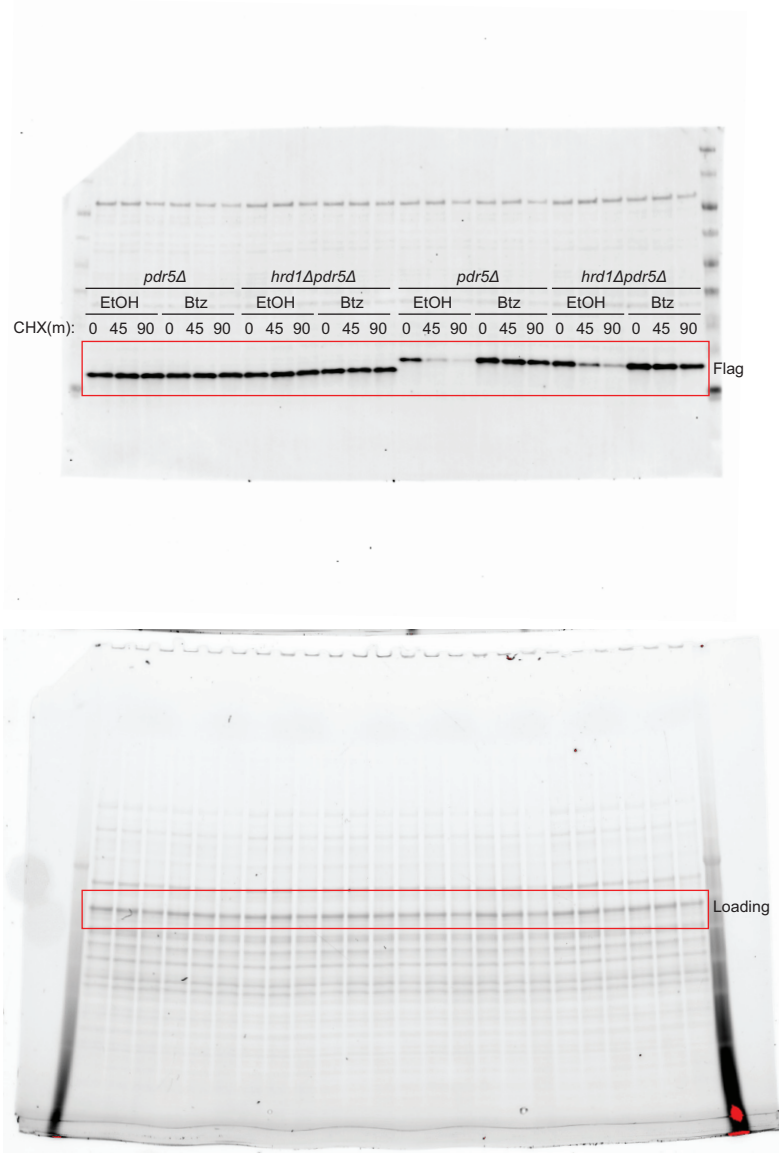

Supplement: fig2-figsupp2-data1 [file elife-89606-fig2-figsupp2-data1-v1.zip]
